# Supplementary material
Source: MDPI journal article supplement (https://www.mdpi.com/2073-4336/2/3/277)
Supplement: s1 [file s1]

# Teaming Instructions for ENFORCED SYM

## Instructions

You are participating in a decision-making experiment, where you have the opportunity to earn money. How much money you earn depends on your own decisions, but may also depend on those of other participants.

You will make individual decisions at your computer. From now on, please do not talk with other participants until the end of the experiment.

In the experiment, you will be anonymously paired with another participant to form a group of two. The experiment consists of 30 repetitions, called periods. You will stay in the same group with the same other participant during all 30 periods. In each of the periods, you will be in the same decision situation.

Each participant has to choose an effort, which is an integer number between 0 and 100. The effort incurs a cost measured in Experimental Currency Units (ECU). The effort cost is equal to the square of the chosen effort divided by 10. Table 1 below shows the cost of each effort level between 1 and 100. Zero effort implies zero cost.

## Your Earnings

Your profit (in ECU) in a period is determined as follows.

- Your profit is determined by the average effort by you and the other group member, multiplied by 10 ECU, minus the cost of your individual effort in ECU.

Your total profit for the experiment equals the sum of your profits over the 30 periods. At the end of the experiment, your total profit will be converted to Canadian dollars with a conversion rate of 25 cents per 100 ECU.

## Available Information

At the beginning of each period (except for the first one), you are informed of your result in the previous period. This includes your individual effort, the average effort in your group, your effort cost, your profit and your cumulated profit over all previous periods.

At any time, by clicking on the magnifying glass icon on your screen, you can access a table of your results in all previous periods. The table shows the results of the first period in the top line and the results of subsequent periods underneath.

Before we begin the experiment, we ask you to answer some comprehension questions regarding these instructions. Everybody must answer all of the questions correctly before we carry on.

**Table 1.** Individual effort cost.

| <b>Niveau</b>      | <b>Coût</b>        | <b>Niveau</b>      | <b>Coût</b>        |
|--------------------|--------------------|--------------------|--------------------|
| <b>de l'effort</b> | <b>de l'effort</b> | <b>de l'effort</b> | <b>de l'effort</b> |
| 1                  | 0,10               | 51                 | 260,10             |
| 2                  | 0,40               | 52                 | 270,40             |
| 3                  | 0,90               | 53                 | 280,90             |
| 4                  | 1,60               | 54                 | 291,60             |
| 5                  | 2,50               | 55                 | 302,50             |
| 6                  | 3,60               | 56                 | 313,60             |
| 7                  | 4,90               | 57                 | 324,90             |
| 8                  | 6,40               | 58                 | 336,40             |
| 9                  | 8,10               | 59                 | 348,10             |
| 10                 | 10,00              | 60                 | 360,00             |
| 11                 | 12,10              | 61                 | 372,10             |
| 12                 | 14,40              | 62                 | 384,40             |
| 13                 | 16,90              | 63                 | 396,90             |
| 14                 | 19,60              | 64                 | 409,60             |
| 15                 | 22,50              | 65                 | 422,50             |
| 16                 | 25,60              | 66                 | 435,60             |
| 17                 | 28,90              | 67                 | 448,90             |
| 18                 | 32,40              | 68                 | 462,40             |
| 19                 | 36,10              | 69                 | 476,10             |
| 20                 | 40,00              | 70                 | 490,00             |
| 21                 | 44,10              | 71                 | 504,10             |
| 22                 | 48,40              | 72                 | 518,40             |
| 23                 | 52,90              | 73                 | 532,90             |
| 24                 | 57,60              | 74                 | 547,60             |
| 25                 | 62,50              | 75                 | 562,50             |
| 26                 | 67,60              | 76                 | 577,60             |
| 27                 | 72,90              | 77                 | 592,90             |
| 28                 | 78,40              | 78                 | 608,40             |
| 29                 | 84,10              | 79                 | 624,10             |
| 30                 | 90,00              | 80                 | 640,00             |
| 31                 | 96,10              | 81                 | 656,10             |
| 32                 | 102,40             | 82                 | 672,40             |
| 33                 | 108,90             | 83                 | 688,90             |
| 34                 | 115,60             | 84                 | 705,60             |
| 35                 | 122,50             | 85                 | 722,50             |
| 36                 | 129,60             | 86                 | 739,60             |
| 37                 | 136,90             | 87                 | 756,90             |
| 38                 | 144,40             | 88                 | 774,40             |
| 39                 | 152,10             | 89                 | 792,10             |
| 40                 | 160,00             | 90                 | 810,00             |
| 41                 | 168,10             | 91                 | 828,10             |
| 42                 | 176,40             | 92                 | 846,40             |
| 43                 | 184,90             | 93                 | 864,90             |
| 44                 | 193,60             | 94                 | 883,60             |
| 45                 | 202,50             | 95                 | 902,50             |
| 46                 | 211,60             | 96                 | 921,60             |
| 47                 | 220,90             | 97                 | 940,90             |
| 48                 | 230,40             | 98                 | 960,40             |
| 49                 | 240,10             | 99                 | 980,10             |
| 50                 | 250,00             | 100                | 1000,00            |

## Data for ENFORCED SYM

| Player | Group | Period | Session | Effort | Other effort | Mean effort | Remuneration | Cost   | Profit | Cum. profit |
|--------|-------|--------|---------|--------|--------------|-------------|--------------|--------|--------|-------------|
| 1      | 1     | 1      | 1       | 70     | 10           | 40.0        | 400.0        | 490.0  | −90.0  | −90.0       |
| 1      | 1     | 2      | 1       | 30     | 10           | 20.0        | 200.0        | 90.0   | 110.0  | 20.0        |
| 1      | 1     | 3      | 1       | 30     | 20           | 25.0        | 250.0        | 90.0   | 160.0  | 180.0       |
| 1      | 1     | 4      | 1       | 40     | 50           | 45.0        | 450.0        | 160.0  | 290.0  | 470.0       |
| 1      | 1     | 5      | 1       | 80     | 60           | 70.0        | 700.0        | 640.0  | 60.0   | 530.0       |
| 1      | 1     | 6      | 1       | 80     | 70           | 75.0        | 750.0        | 640.0  | 110.0  | 640.0       |
| 1      | 1     | 7      | 1       | 40     | 5            | 22.5        | 225.0        | 160.0  | 65.0   | 705.0       |
| 1      | 1     | 8      | 1       | 60     | 50           | 55.0        | 550.0        | 360.0  | 190.0  | 895.0       |
| 1      | 1     | 9      | 1       | 50     | 1            | 25.5        | 255.0        | 250.0  | 5.0    | 900.0       |
| 1      | 1     | 10     | 1       | 50     | 60           | 55.0        | 550.0        | 250.0  | 300.0  | 1200.0      |
| 1      | 1     | 11     | 1       | 50     | 10           | 30.0        | 300.0        | 250.0  | 50.0   | 1250.0      |
| 1      | 1     | 12     | 1       | 10     | 60           | 35.0        | 350.0        | 10.0   | 340.0  | 1590.0      |
| 1      | 1     | 13     | 1       | 15     | 1            | 8.0         | 80.0         | 22.5   | 57.5   | 1647.5      |
| 1      | 1     | 14     | 1       | 60     | 40           | 50.0        | 500.0        | 360.0  | 140.0  | 1787.5      |
| 1      | 1     | 15     | 1       | 60     | 40           | 50.0        | 500.0        | 360.0  | 140.0  | 1927.5      |
| 1      | 1     | 16     | 1       | 10     | 60           | 35.0        | 350.0        | 10.0   | 340.0  | 2267.5      |
| 1      | 1     | 17     | 1       | 15     | 2            | 8.5         | 85.0         | 22.5   | 62.5   | 2330.0      |
| 1      | 1     | 18     | 1       | 50     | 50           | 50.0        | 500.0        | 250.0  | 250.0  | 2580.0      |
| 1      | 1     | 19     | 1       | 50     | 50           | 50.0        | 500.0        | 250.0  | 250.0  | 2830.0      |
| 1      | 1     | 20     | 1       | 60     | 15           | 37.5        | 375.0        | 360.0  | 15.0   | 2845.0      |
| 1      | 1     | 21     | 1       | 50     | 1            | 25.5        | 255.0        | 250.0  | 5.0    | 2850.0      |
| 1      | 1     | 22     | 1       | 10     | 20           | 15.0        | 150.0        | 10.0   | 140.0  | 2990.0      |
| 1      | 1     | 23     | 1       | 5      | 30           | 17.5        | 175.0        | 2.5    | 172.5  | 3162.5      |
| 1      | 1     | 24     | 1       | 10     | 20           | 15.0        | 150.0        | 10.0   | 140.0  | 3302.5      |
| 1      | 1     | 25     | 1       | 5      | 40           | 22.5        | 225.0        | 2.5    | 222.5  | 3525.0      |
| 1      | 1     | 26     | 1       | 50     | 40           | 45.0        | 450.0        | 250.0  | 200.0  | 3725.0      |
| 1      | 1     | 27     | 1       | 50     | 50           | 50.0        | 500.0        | 250.0  | 250.0  | 3975.0      |
| 1      | 1     | 28     | 1       | 50     | 50           | 50.0        | 500.0        | 250.0  | 250.0  | 4225.0      |
| 1      | 1     | 29     | 1       | 50     | 100          | 75.0        | 750.0        | 250.0  | 500.0  | 4725.0      |
| 1      | 1     | 30     | 1       | 100    | 1            | 50.5        | 505.0        | 1000.0 | −495.0 | 4230.0      |
| 5      | 1     | 1      | 1       | 10     | 70           | 40.0        | 400.0        | 10.0   | 390.0  | 390.0       |
| 5      | 1     | 2      | 1       | 10     | 30           | 20.0        | 200.0        | 10.0   | 190.0  | 580.0       |
| 5      | 1     | 3      | 1       | 20     | 30           | 25.0        | 250.0        | 40.0   | 210.0  | 790.0       |

|   |   |    |   |     |     |      |       |        |        |        |
|---|---|----|---|-----|-----|------|-------|--------|--------|--------|
| 5 | 1 | 4  | 1 | 50  | 40  | 45.0 | 450.0 | 250.0  | 200.0  | 990.0  |
| 5 | 1 | 5  | 1 | 60  | 80  | 70.0 | 700.0 | 360.0  | 340.0  | 1330.0 |
| 5 | 1 | 6  | 1 | 70  | 80  | 75.0 | 750.0 | 490.0  | 260.0  | 1590.0 |
| 5 | 1 | 7  | 1 | 5   | 40  | 22.5 | 225.0 | 2.5    | 222.5  | 1812.5 |
| 5 | 1 | 8  | 1 | 50  | 60  | 55.0 | 550.0 | 250.0  | 300.0  | 2112.5 |
| 5 | 1 | 9  | 1 | 1   | 50  | 25.5 | 255.0 | 0.1    | 254.9  | 2367.4 |
| 5 | 1 | 10 | 1 | 60  | 50  | 55.0 | 550.0 | 360.0  | 190.0  | 2557.4 |
| 5 | 1 | 11 | 1 | 10  | 50  | 30.0 | 300.0 | 10.0   | 290.0  | 2847.4 |
| 5 | 1 | 12 | 1 | 60  | 10  | 35.0 | 350.0 | 360.0  | -10.0  | 2837.4 |
| 5 | 1 | 13 | 1 | 1   | 15  | 8.0  | 80.0  | 0.1    | 79.9   | 2917.3 |
| 5 | 1 | 14 | 1 | 40  | 60  | 50.0 | 500.0 | 160.0  | 340.0  | 3257.3 |
| 5 | 1 | 15 | 1 | 40  | 60  | 50.0 | 500.0 | 160.0  | 340.0  | 3597.3 |
| 5 | 1 | 16 | 1 | 60  | 10  | 35.0 | 350.0 | 360.0  | -10.0  | 3587.3 |
| 5 | 1 | 17 | 1 | 2   | 15  | 8.5  | 85.0  | 0.4    | 84.6   | 3671.9 |
| 5 | 1 | 18 | 1 | 50  | 50  | 50.0 | 500.0 | 250.0  | 250.0  | 3921.9 |
| 5 | 1 | 19 | 1 | 50  | 50  | 50.0 | 500.0 | 250.0  | 250.0  | 4171.9 |
| 5 | 1 | 20 | 1 | 15  | 60  | 37.5 | 375.0 | 22.5   | 352.5  | 4524.4 |
| 5 | 1 | 21 | 1 | 1   | 50  | 25.5 | 255.0 | 0.1    | 254.9  | 4779.3 |
| 5 | 1 | 22 | 1 | 20  | 10  | 15.0 | 150.0 | 40.0   | 110.0  | 4889.3 |
| 5 | 1 | 23 | 1 | 30  | 5   | 17.5 | 175.0 | 90.0   | 85.0   | 4974.3 |
| 5 | 1 | 24 | 1 | 20  | 10  | 15.0 | 150.0 | 40.0   | 110.0  | 5084.3 |
| 5 | 1 | 25 | 1 | 40  | 5   | 22.5 | 225.0 | 160.0  | 65.0   | 5149.3 |
| 5 | 1 | 26 | 1 | 40  | 50  | 45.0 | 450.0 | 160.0  | 290.0  | 5439.3 |
| 5 | 1 | 27 | 1 | 50  | 50  | 50.0 | 500.0 | 250.0  | 250.0  | 5689.3 |
| 5 | 1 | 28 | 1 | 50  | 50  | 50.0 | 500.0 | 250.0  | 250.0  | 5939.3 |
| 5 | 1 | 29 | 1 | 100 | 50  | 75.0 | 750.0 | 1000.0 | -250.0 | 5689.3 |
| 5 | 1 | 30 | 1 | 1   | 100 | 50.5 | 505.0 | 0.1    | 504.9  | 6194.2 |
| 2 | 2 | 1  | 1 | 50  | 20  | 35.0 | 350.0 | 250.0  | 100.0  | 100.0  |
| 2 | 2 | 2  | 1 | 70  | 40  | 55.0 | 550.0 | 490.0  | 60.0   | 160.0  |
| 2 | 2 | 3  | 1 | 65  | 30  | 47.5 | 475.0 | 422.5  | 52.5   | 212.5  |
| 2 | 2 | 4  | 1 | 28  | 45  | 36.5 | 365.0 | 78.4   | 286.6  | 499.1  |
| 2 | 2 | 5  | 1 | 80  | 16  | 48.0 | 480.0 | 640.0  | -160.0 | 339.1  |
| 2 | 2 | 6  | 1 | 24  | 30  | 27.0 | 270.0 | 57.6   | 212.4  | 551.5  |
| 2 | 2 | 7  | 1 | 35  | 35  | 35.0 | 350.0 | 122.5  | 227.5  | 779.0  |
| 2 | 2 | 8  | 1 | 55  | 25  | 40.0 | 400.0 | 302.5  | 97.5   | 876.5  |

|   |   |    |   |    |    |      |       |       |        |        |
|---|---|----|---|----|----|------|-------|-------|--------|--------|
| 2 | 2 | 9  | 1 | 30 | 15 | 22.5 | 225.0 | 90.0  | 135.0  | 1011.5 |
| 2 | 2 | 10 | 1 | 45 | 25 | 35.0 | 350.0 | 202.5 | 147.5  | 1159.0 |
| 2 | 2 | 11 | 1 | 70 | 32 | 51.0 | 510.0 | 490.0 | 20.0   | 1179.0 |
| 2 | 2 | 12 | 1 | 38 | 22 | 30.0 | 300.0 | 144.4 | 155.6  | 1334.6 |
| 2 | 2 | 13 | 1 | 45 | 16 | 30.5 | 305.0 | 202.5 | 102.5  | 1437.1 |
| 2 | 2 | 14 | 1 | 50 | 8  | 29.0 | 290.0 | 250.0 | 40.0   | 1477.1 |
| 2 | 2 | 15 | 1 | 15 | 5  | 10.0 | 100.0 | 22.5  | 77.5   | 1554.6 |
| 2 | 2 | 16 | 1 | 75 | 17 | 46.0 | 460.0 | 562.5 | -102.5 | 1452.1 |
| 2 | 2 | 17 | 1 | 45 | 19 | 32.0 | 320.0 | 202.5 | 117.5  | 1569.6 |
| 2 | 2 | 18 | 1 | 40 | 27 | 33.5 | 335.0 | 160.0 | 175.0  | 1744.6 |
| 2 | 2 | 19 | 1 | 30 | 21 | 25.5 | 255.0 | 90.0  | 165.0  | 1909.6 |
| 2 | 2 | 20 | 1 | 55 | 37 | 46.0 | 460.0 | 302.5 | 157.5  | 2067.1 |
| 2 | 2 | 21 | 1 | 60 | 47 | 53.5 | 535.0 | 360.0 | 175.0  | 2242.1 |
| 2 | 2 | 22 | 1 | 57 | 13 | 35.0 | 350.0 | 324.9 | 25.1   | 2267.2 |
| 2 | 2 | 23 | 1 | 50 | 9  | 29.5 | 295.0 | 250.0 | 45.0   | 2312.2 |
| 2 | 2 | 24 | 1 | 42 | 33 | 37.5 | 375.0 | 176.4 | 198.6  | 2510.8 |
| 2 | 2 | 25 | 1 | 57 | 41 | 49.0 | 490.0 | 324.9 | 165.1  | 2675.9 |
| 2 | 2 | 26 | 1 | 59 | 16 | 37.5 | 375.0 | 348.1 | 26.9   | 2702.8 |
| 2 | 2 | 27 | 1 | 48 | 48 | 48.0 | 480.0 | 230.4 | 249.6  | 2952.4 |
| 2 | 2 | 28 | 1 | 49 | 36 | 42.5 | 425.0 | 240.1 | 184.9  | 3137.3 |
| 2 | 2 | 29 | 1 | 55 | 29 | 42.0 | 420.0 | 302.5 | 117.5  | 3254.8 |
| 2 | 2 | 30 | 1 | 60 | 7  | 33.5 | 335.0 | 360.0 | -25.0  | 3229.8 |
| 6 | 2 | 1  | 1 | 20 | 50 | 35.0 | 350.0 | 40.0  | 310.0  | 310.0  |
| 6 | 2 | 2  | 1 | 40 | 70 | 55.0 | 550.0 | 160.0 | 390.0  | 700.0  |
| 6 | 2 | 3  | 1 | 30 | 65 | 47.5 | 475.0 | 90.0  | 385.0  | 1085.0 |
| 6 | 2 | 4  | 1 | 45 | 28 | 36.5 | 365.0 | 202.5 | 162.5  | 1247.5 |
| 6 | 2 | 5  | 1 | 16 | 80 | 48.0 | 480.0 | 25.6  | 454.4  | 1701.9 |
| 6 | 2 | 6  | 1 | 30 | 24 | 27.0 | 270.0 | 90.0  | 180.0  | 1881.9 |
| 6 | 2 | 7  | 1 | 35 | 35 | 35.0 | 350.0 | 122.5 | 227.5  | 2109.4 |
| 6 | 2 | 8  | 1 | 25 | 55 | 40.0 | 400.0 | 62.5  | 337.5  | 2446.9 |
| 6 | 2 | 9  | 1 | 15 | 30 | 22.5 | 225.0 | 22.5  | 202.5  | 2649.4 |
| 6 | 2 | 10 | 1 | 25 | 45 | 35.0 | 350.0 | 62.5  | 287.5  | 2936.9 |
| 6 | 2 | 11 | 1 | 32 | 70 | 51.0 | 510.0 | 102.4 | 407.6  | 3344.5 |
| 6 | 2 | 12 | 1 | 22 | 38 | 30.0 | 300.0 | 48.4  | 251.6  | 3596.1 |
| 6 | 2 | 13 | 1 | 16 | 45 | 30.5 | 305.0 | 25.6  | 279.4  | 3875.5 |

|   |   |    |   |    |    |      |       |       |        |        |
|---|---|----|---|----|----|------|-------|-------|--------|--------|
| 6 | 2 | 14 | 1 | 8  | 50 | 29.0 | 290.0 | 6.4   | 283.6  | 4159.1 |
| 6 | 2 | 15 | 1 | 5  | 15 | 10.0 | 100.0 | 2.5   | 97.5   | 4256.6 |
| 6 | 2 | 16 | 1 | 17 | 75 | 46.0 | 460.0 | 28.9  | 431.1  | 4687.7 |
| 6 | 2 | 17 | 1 | 19 | 45 | 32.0 | 320.0 | 36.1  | 283.9  | 4971.6 |
| 6 | 2 | 18 | 1 | 27 | 40 | 33.5 | 335.0 | 72.9  | 262.1  | 5233.7 |
| 6 | 2 | 19 | 1 | 21 | 30 | 25.5 | 255.0 | 44.1  | 210.9  | 5444.6 |
| 6 | 2 | 20 | 1 | 37 | 55 | 46.0 | 460.0 | 136.9 | 323.1  | 5767.7 |
| 6 | 2 | 21 | 1 | 47 | 60 | 53.5 | 535.0 | 220.9 | 314.1  | 6081.8 |
| 6 | 2 | 22 | 1 | 13 | 57 | 35.0 | 350.0 | 16.9  | 333.1  | 6414.9 |
| 6 | 2 | 23 | 1 | 9  | 50 | 29.5 | 295.0 | 8.1   | 286.9  | 6701.8 |
| 6 | 2 | 24 | 1 | 33 | 42 | 37.5 | 375.0 | 108.9 | 266.1  | 6967.9 |
| 6 | 2 | 25 | 1 | 41 | 57 | 49.0 | 490.0 | 168.1 | 321.9  | 7289.8 |
| 6 | 2 | 26 | 1 | 16 | 59 | 37.5 | 375.0 | 25.6  | 349.4  | 7639.2 |
| 6 | 2 | 27 | 1 | 48 | 48 | 48.0 | 480.0 | 230.4 | 249.6  | 7888.8 |
| 6 | 2 | 28 | 1 | 36 | 49 | 42.5 | 425.0 | 129.6 | 295.4  | 8184.2 |
| 6 | 2 | 29 | 1 | 29 | 55 | 42.0 | 420.0 | 84.1  | 335.9  | 8520.1 |
| 6 | 2 | 30 | 1 | 7  | 60 | 33.5 | 335.0 | 4.9   | 330.1  | 8850.2 |
| 3 | 3 | 1  | 1 | 70 | 22 | 46.0 | 460.0 | 490.0 | −30.0  | −30.0  |
| 3 | 3 | 2  | 1 | 60 | 30 | 45.0 | 450.0 | 360.0 | 90.0   | 60.0   |
| 3 | 3 | 3  | 1 | 65 | 10 | 37.5 | 375.0 | 422.5 | −47.5  | 12.5   |
| 3 | 3 | 4  | 1 | 80 | 20 | 50.0 | 500.0 | 640.0 | −140.0 | −127.5 |
| 3 | 3 | 5  | 1 | 50 | 50 | 50.0 | 500.0 | 250.0 | 250.0  | 122.5  |
| 3 | 3 | 6  | 1 | 40 | 45 | 42.5 | 425.0 | 160.0 | 265.0  | 387.5  |
| 3 | 3 | 7  | 1 | 20 | 10 | 15.0 | 150.0 | 40.0  | 110.0  | 497.5  |
| 3 | 3 | 8  | 1 | 25 | 20 | 22.5 | 225.0 | 62.5  | 162.5  | 660.0  |
| 3 | 3 | 9  | 1 | 15 | 30 | 22.5 | 225.0 | 22.5  | 202.5  | 862.5  |
| 3 | 3 | 10 | 1 | 30 | 40 | 35.0 | 350.0 | 90.0  | 260.0  | 1122.5 |
| 3 | 3 | 11 | 1 | 50 | 15 | 32.5 | 325.0 | 250.0 | 75.0   | 1197.5 |
| 3 | 3 | 12 | 1 | 55 | 25 | 40.0 | 400.0 | 302.5 | 97.5   | 1295.0 |
| 3 | 3 | 13 | 1 | 50 | 50 | 50.0 | 500.0 | 250.0 | 250.0  | 1545.0 |
| 3 | 3 | 14 | 1 | 70 | 60 | 65.0 | 650.0 | 490.0 | 160.0  | 1705.0 |
| 3 | 3 | 15 | 1 | 70 | 60 | 65.0 | 650.0 | 490.0 | 160.0  | 1865.0 |
| 3 | 3 | 16 | 1 | 80 | 20 | 50.0 | 500.0 | 640.0 | −140.0 | 1725.0 |
| 3 | 3 | 17 | 1 | 60 | 35 | 47.5 | 475.0 | 360.0 | 115.0  | 1840.0 |
| 3 | 3 | 18 | 1 | 65 | 25 | 45.0 | 450.0 | 422.5 | 27.5   | 1867.5 |

|   |   |    |   |    |    |      |       |       |       |        |
|---|---|----|---|----|----|------|-------|-------|-------|--------|
| 3 | 3 | 19 | 1 | 50 | 50 | 50.0 | 500.0 | 250.0 | 250.0 | 2117.5 |
| 3 | 3 | 20 | 1 | 55 | 25 | 40.0 | 400.0 | 302.5 | 97.5  | 2215.0 |
| 3 | 3 | 21 | 1 | 50 | 29 | 39.5 | 395.0 | 250.0 | 145.0 | 2360.0 |
| 3 | 3 | 22 | 1 | 40 | 75 | 57.5 | 575.0 | 160.0 | 415.0 | 2775.0 |
| 3 | 3 | 23 | 1 | 55 | 22 | 38.5 | 385.0 | 302.5 | 82.5  | 2857.5 |
| 3 | 3 | 24 | 1 | 60 | 19 | 39.5 | 395.0 | 360.0 | 35.0  | 2892.5 |
| 3 | 3 | 25 | 1 | 40 | 29 | 34.5 | 345.0 | 160.0 | 185.0 | 3077.5 |
| 3 | 3 | 26 | 1 | 45 | 23 | 34.0 | 340.0 | 202.5 | 137.5 | 3215.0 |
| 3 | 3 | 27 | 1 | 40 | 17 | 28.5 | 285.0 | 160.0 | 125.0 | 3340.0 |
| 3 | 3 | 28 | 1 | 30 | 13 | 21.5 | 215.0 | 90.0  | 125.0 | 3465.0 |
| 3 | 3 | 29 | 1 | 30 | 29 | 29.5 | 295.0 | 90.0  | 205.0 | 3670.0 |
| 3 | 3 | 30 | 1 | 50 | 26 | 38.0 | 380.0 | 250.0 | 130.0 | 3800.0 |
| 7 | 3 | 1  | 1 | 22 | 70 | 46.0 | 460.0 | 48.4  | 411.6 | 411.6  |
| 7 | 3 | 2  | 1 | 30 | 60 | 45.0 | 450.0 | 90.0  | 360.0 | 771.6  |
| 7 | 3 | 3  | 1 | 10 | 65 | 37.5 | 375.0 | 10.0  | 365.0 | 1136.6 |
| 7 | 3 | 4  | 1 | 20 | 80 | 50.0 | 500.0 | 40.0  | 460.0 | 1596.6 |
| 7 | 3 | 5  | 1 | 50 | 50 | 50.0 | 500.0 | 250.0 | 250.0 | 1846.6 |
| 7 | 3 | 6  | 1 | 45 | 40 | 42.5 | 425.0 | 202.5 | 222.5 | 2069.1 |
| 7 | 3 | 7  | 1 | 10 | 20 | 15.0 | 150.0 | 10.0  | 140.0 | 2209.1 |
| 7 | 3 | 8  | 1 | 20 | 25 | 22.5 | 225.0 | 40.0  | 185.0 | 2394.1 |
| 7 | 3 | 9  | 1 | 30 | 15 | 22.5 | 225.0 | 90.0  | 135.0 | 2529.1 |
| 7 | 3 | 10 | 1 | 40 | 30 | 35.0 | 350.0 | 160.0 | 190.0 | 2719.1 |
| 7 | 3 | 11 | 1 | 15 | 50 | 32.5 | 325.0 | 22.5  | 302.5 | 3021.6 |
| 7 | 3 | 12 | 1 | 25 | 55 | 40.0 | 400.0 | 62.5  | 337.5 | 3359.1 |
| 7 | 3 | 13 | 1 | 50 | 50 | 50.0 | 500.0 | 250.0 | 250.0 | 3609.1 |
| 7 | 3 | 14 | 1 | 60 | 70 | 65.0 | 650.0 | 360.0 | 290.0 | 3899.1 |
| 7 | 3 | 15 | 1 | 60 | 70 | 65.0 | 650.0 | 360.0 | 290.0 | 4189.1 |
| 7 | 3 | 16 | 1 | 20 | 80 | 50.0 | 500.0 | 40.0  | 460.0 | 4649.1 |
| 7 | 3 | 17 | 1 | 35 | 60 | 47.5 | 475.0 | 122.5 | 352.5 | 5001.6 |
| 7 | 3 | 18 | 1 | 25 | 65 | 45.0 | 450.0 | 62.5  | 387.5 | 5389.1 |
| 7 | 3 | 19 | 1 | 50 | 50 | 50.0 | 500.0 | 250.0 | 250.0 | 5639.1 |
| 7 | 3 | 20 | 1 | 25 | 55 | 40.0 | 400.0 | 62.5  | 337.5 | 5976.6 |
| 7 | 3 | 21 | 1 | 29 | 50 | 39.5 | 395.0 | 84.1  | 310.9 | 6287.5 |
| 7 | 3 | 22 | 1 | 75 | 40 | 57.5 | 575.0 | 562.5 | 12.5  | 6300.0 |
| 7 | 3 | 23 | 1 | 22 | 55 | 38.5 | 385.0 | 48.4  | 336.6 | 6636.6 |

|   |   |    |   |    |    |      |       |      |       |        |
|---|---|----|---|----|----|------|-------|------|-------|--------|
| 7 | 3 | 24 | 1 | 19 | 60 | 39.5 | 395.0 | 36.1 | 358.9 | 6995.5 |
| 7 | 3 | 25 | 1 | 29 | 40 | 34.5 | 345.0 | 84.1 | 260.9 | 7256.4 |
| 7 | 3 | 26 | 1 | 23 | 45 | 34.0 | 340.0 | 52.9 | 287.1 | 7543.5 |
| 7 | 3 | 27 | 1 | 17 | 40 | 28.5 | 285.0 | 28.9 | 256.1 | 7799.6 |
| 7 | 3 | 28 | 1 | 13 | 30 | 21.5 | 215.0 | 16.9 | 198.1 | 7997.7 |
| 7 | 3 | 29 | 1 | 29 | 30 | 29.5 | 295.0 | 84.1 | 210.9 | 8208.6 |
| 7 | 3 | 30 | 1 | 26 | 50 | 38.0 | 380.0 | 67.6 | 312.4 | 8521.0 |
| 4 | 4 | 1  | 1 | 20 | 40 | 30.0 | 300.0 | 40.0 | 260.0 | 260.0  |
| 4 | 4 | 2  | 1 | 30 | 5  | 17.5 | 175.0 | 90.0 | 85.0  | 345.0  |
| 4 | 4 | 3  | 1 | 25 | 30 | 27.5 | 275.0 | 62.5 | 212.5 | 557.5  |
| 4 | 4 | 4  | 1 | 10 | 40 | 25.0 | 250.0 | 10.0 | 240.0 | 797.5  |
| 4 | 4 | 5  | 1 | 10 | 35 | 22.5 | 225.0 | 10.0 | 215.0 | 1012.5 |
| 4 | 4 | 6  | 1 | 11 | 5  | 8.0  | 80.0  | 12.1 | 67.9  | 1080.4 |
| 4 | 4 | 7  | 1 | 5  | 25 | 15.0 | 150.0 | 2.5  | 147.5 | 1227.9 |
| 4 | 4 | 8  | 1 | 15 | 25 | 20.0 | 200.0 | 22.5 | 177.5 | 1405.4 |
| 4 | 4 | 9  | 1 | 15 | 30 | 22.5 | 225.0 | 22.5 | 202.5 | 1607.9 |
| 4 | 4 | 10 | 1 | 20 | 30 | 25.0 | 250.0 | 40.0 | 210.0 | 1817.9 |
| 4 | 4 | 11 | 1 | 5  | 25 | 15.0 | 150.0 | 2.5  | 147.5 | 1965.4 |
| 4 | 4 | 12 | 1 | 15 | 20 | 17.5 | 175.0 | 22.5 | 152.5 | 2117.9 |
| 4 | 4 | 13 | 1 | 10 | 28 | 19.0 | 190.0 | 10.0 | 180.0 | 2297.9 |
| 4 | 4 | 14 | 1 | 9  | 25 | 17.0 | 170.0 | 8.1  | 161.9 | 2459.8 |
| 4 | 4 | 15 | 1 | 9  | 30 | 19.5 | 195.0 | 8.1  | 186.9 | 2646.7 |
| 4 | 4 | 16 | 1 | 15 | 1  | 8.0  | 80.0  | 22.5 | 57.5  | 2704.2 |
| 4 | 4 | 17 | 1 | 8  | 1  | 4.5  | 45.0  | 6.4  | 38.6  | 2742.8 |
| 4 | 4 | 18 | 1 | 1  | 1  | 1.0  | 10.0  | 0.1  | 9.9   | 2752.7 |
| 4 | 4 | 19 | 1 | 0  | 30 | 15.0 | 150.0 | 0.0  | 150.0 | 2902.7 |
| 4 | 4 | 20 | 1 | 0  | 30 | 15.0 | 150.0 | 0.0  | 150.0 | 3052.7 |
| 4 | 4 | 21 | 1 | 5  | 40 | 22.5 | 225.0 | 2.5  | 222.5 | 3275.2 |
| 4 | 4 | 22 | 1 | 5  | 40 | 22.5 | 225.0 | 2.5  | 222.5 | 3497.7 |
| 4 | 4 | 23 | 1 | 7  | 5  | 6.0  | 60.0  | 4.9  | 55.1  | 3552.8 |
| 4 | 4 | 24 | 1 | 0  | 5  | 2.5  | 25.0  | 0.0  | 25.0  | 3577.8 |
| 4 | 4 | 25 | 1 | 5  | 0  | 2.5  | 25.0  | 2.5  | 22.5  | 3600.3 |
| 4 | 4 | 26 | 1 | 5  | 10 | 7.5  | 75.0  | 2.5  | 72.5  | 3672.8 |
| 4 | 4 | 27 | 1 | 5  | 40 | 22.5 | 225.0 | 2.5  | 222.5 | 3895.3 |
| 4 | 4 | 28 | 1 | 5  | 50 | 27.5 | 275.0 | 2.5  | 272.5 | 4167.8 |



|   |   |    |   |    |    |      |       |       |       |        |
|---|---|----|---|----|----|------|-------|-------|-------|--------|
| 4 | 4 | 29 | 1 | 5  | 0  | 2.5  | 25.0  | 2.5   | 22.5  | 4190.3 |
| 4 | 4 | 30 | 1 | 0  | 5  | 2.5  | 25.0  | 0.0   | 25.0  | 4215.3 |
| 8 | 4 | 1  | 1 | 40 | 20 | 30.0 | 300.0 | 160.0 | 140.0 | 140.0  |
| 8 | 4 | 2  | 1 | 5  | 30 | 17.5 | 175.0 | 2.5   | 172.5 | 312.5  |
| 8 | 4 | 3  | 1 | 30 | 25 | 27.5 | 275.0 | 90.0  | 185.0 | 497.5  |
| 8 | 4 | 4  | 1 | 40 | 10 | 25.0 | 250.0 | 160.0 | 90.0  | 587.5  |
| 8 | 4 | 5  | 1 | 35 | 10 | 22.5 | 225.0 | 122.5 | 102.5 | 690.0  |
| 8 | 4 | 6  | 1 | 5  | 11 | 8.0  | 80.0  | 2.5   | 77.5  | 767.5  |
| 8 | 4 | 7  | 1 | 25 | 5  | 15.0 | 150.0 | 62.5  | 87.5  | 855.0  |
| 8 | 4 | 8  | 1 | 25 | 15 | 20.0 | 200.0 | 62.5  | 137.5 | 992.5  |
| 8 | 4 | 9  | 1 | 30 | 15 | 22.5 | 225.0 | 90.0  | 135.0 | 1127.5 |
| 8 | 4 | 10 | 1 | 30 | 20 | 25.0 | 250.0 | 90.0  | 160.0 | 1287.5 |
| 8 | 4 | 11 | 1 | 25 | 5  | 15.0 | 150.0 | 62.5  | 87.5  | 1375.0 |
| 8 | 4 | 12 | 1 | 20 | 15 | 17.5 | 175.0 | 40.0  | 135.0 | 1510.0 |
| 8 | 4 | 13 | 1 | 28 | 10 | 19.0 | 190.0 | 78.4  | 111.6 | 1621.6 |
| 8 | 4 | 14 | 1 | 25 | 9  | 17.0 | 170.0 | 62.5  | 107.5 | 1729.1 |
| 8 | 4 | 15 | 1 | 30 | 9  | 19.5 | 195.0 | 90.0  | 105.0 | 1834.1 |
| 8 | 4 | 16 | 1 | 1  | 15 | 8.0  | 80.0  | 0.1   | 79.9  | 1914.0 |
| 8 | 4 | 17 | 1 | 1  | 8  | 4.5  | 45.0  | 0.1   | 44.9  | 1958.9 |
| 8 | 4 | 18 | 1 | 1  | 1  | 1.0  | 10.0  | 0.1   | 9.9   | 1968.8 |
| 8 | 4 | 19 | 1 | 30 | 0  | 15.0 | 150.0 | 90.0  | 60.0  | 2028.8 |
| 8 | 4 | 20 | 1 | 30 | 0  | 15.0 | 150.0 | 90.0  | 60.0  | 2088.8 |
| 8 | 4 | 21 | 1 | 40 | 5  | 22.5 | 225.0 | 160.0 | 65.0  | 2153.8 |
| 8 | 4 | 22 | 1 | 40 | 5  | 22.5 | 225.0 | 160.0 | 65.0  | 2218.8 |
| 8 | 4 | 23 | 1 | 5  | 7  | 6.0  | 60.0  | 2.5   | 57.5  | 2276.3 |
| 8 | 4 | 24 | 1 | 5  | 0  | 2.5  | 25.0  | 2.5   | 22.5  | 2298.8 |
| 8 | 4 | 25 | 1 | 0  | 5  | 2.5  | 25.0  | 0.0   | 25.0  | 2323.8 |
| 8 | 4 | 26 | 1 | 10 | 5  | 7.5  | 75.0  | 10.0  | 65.0  | 2388.8 |
| 8 | 4 | 27 | 1 | 40 | 5  | 22.5 | 225.0 | 160.0 | 65.0  | 2453.8 |
| 8 | 4 | 28 | 1 | 50 | 5  | 27.5 | 275.0 | 250.0 | 25.0  | 2478.8 |
| 8 | 4 | 29 | 1 | 0  | 5  | 2.5  | 25.0  | 0.0   | 25.0  | 2503.8 |
| 8 | 4 | 30 | 1 | 5  | 0  | 2.5  | 25.0  | 2.5   | 22.5  | 2526.3 |
| 9 | 5 | 1  | 2 | 40 | 50 | 45.0 | 450.0 | 160.0 | 290.0 | 290.0  |
| 9 | 5 | 2  | 2 | 45 | 40 | 42.5 | 425.0 | 202.5 | 222.5 | 512.5  |
| 9 | 5 | 3  | 2 | 40 | 40 | 40.0 | 400.0 | 160.0 | 240.0 | 752.5  |

|    |   |    |   |    |    |      |       |       |       |        |
|----|---|----|---|----|----|------|-------|-------|-------|--------|
| 9  | 5 | 4  | 2 | 48 | 40 | 44.0 | 440.0 | 230.4 | 209.6 | 962.1  |
| 9  | 5 | 5  | 2 | 45 | 50 | 47.5 | 475.0 | 202.5 | 272.5 | 1234.6 |
| 9  | 5 | 6  | 2 | 48 | 45 | 46.5 | 465.0 | 230.4 | 234.6 | 1469.2 |
| 9  | 5 | 7  | 2 | 52 | 46 | 49.0 | 490.0 | 270.4 | 219.6 | 1688.8 |
| 9  | 5 | 8  | 2 | 50 | 48 | 49.0 | 490.0 | 250.0 | 240.0 | 1928.8 |
| 9  | 5 | 9  | 2 | 50 | 49 | 49.5 | 495.0 | 250.0 | 245.0 | 2173.8 |
| 9  | 5 | 10 | 2 | 51 | 50 | 50.5 | 505.0 | 260.1 | 244.9 | 2418.7 |
| 9  | 5 | 11 | 2 | 53 | 50 | 51.5 | 515.0 | 280.9 | 234.1 | 2652.8 |
| 9  | 5 | 12 | 2 | 50 | 50 | 50.0 | 500.0 | 250.0 | 250.0 | 2902.8 |
| 9  | 5 | 13 | 2 | 45 | 50 | 47.5 | 475.0 | 202.5 | 272.5 | 3175.3 |
| 9  | 5 | 14 | 2 | 48 | 45 | 46.5 | 465.0 | 230.4 | 234.6 | 3409.9 |
| 9  | 5 | 15 | 2 | 48 | 47 | 47.5 | 475.0 | 230.4 | 244.6 | 3654.5 |
| 9  | 5 | 16 | 2 | 49 | 48 | 48.5 | 485.0 | 240.1 | 244.9 | 3899.4 |
| 9  | 5 | 17 | 2 | 51 | 49 | 50.0 | 500.0 | 260.1 | 239.9 | 4139.3 |
| 9  | 5 | 18 | 2 | 52 | 50 | 51.0 | 510.0 | 270.4 | 239.6 | 4378.9 |
| 9  | 5 | 19 | 2 | 51 | 50 | 50.5 | 505.0 | 260.1 | 244.9 | 4623.8 |
| 9  | 5 | 20 | 2 | 52 | 50 | 51.0 | 510.0 | 270.4 | 239.6 | 4863.4 |
| 9  | 5 | 21 | 2 | 53 | 50 | 51.5 | 515.0 | 280.9 | 234.1 | 5097.5 |
| 9  | 5 | 22 | 2 | 50 | 50 | 50.0 | 500.0 | 250.0 | 250.0 | 5347.5 |
| 9  | 5 | 23 | 2 | 48 | 50 | 49.0 | 490.0 | 230.4 | 259.6 | 5607.1 |
| 9  | 5 | 24 | 2 | 48 | 49 | 48.5 | 485.0 | 230.4 | 254.6 | 5861.7 |
| 9  | 5 | 25 | 2 | 45 | 49 | 47.0 | 470.0 | 202.5 | 267.5 | 6129.2 |
| 9  | 5 | 26 | 2 | 44 | 48 | 46.0 | 460.0 | 193.6 | 266.4 | 6395.6 |
| 9  | 5 | 27 | 2 | 44 | 44 | 44.0 | 440.0 | 193.6 | 246.4 | 6642.0 |
| 9  | 5 | 28 | 2 | 42 | 44 | 43.0 | 430.0 | 176.4 | 253.6 | 6895.6 |
| 9  | 5 | 29 | 2 | 42 | 20 | 31.0 | 310.0 | 176.4 | 133.6 | 7029.2 |
| 9  | 5 | 30 | 2 | 1  | 10 | 5.5  | 55.0  | 0.1   | 54.9  | 7084.1 |
| 13 | 5 | 1  | 2 | 50 | 40 | 45.0 | 450.0 | 250.0 | 200.0 | 200.0  |
| 13 | 5 | 2  | 2 | 40 | 45 | 42.5 | 425.0 | 160.0 | 265.0 | 465.0  |
| 13 | 5 | 3  | 2 | 40 | 40 | 40.0 | 400.0 | 160.0 | 240.0 | 705.0  |
| 13 | 5 | 4  | 2 | 40 | 48 | 44.0 | 440.0 | 160.0 | 280.0 | 985.0  |
| 13 | 5 | 5  | 2 | 50 | 45 | 47.5 | 475.0 | 250.0 | 225.0 | 1210.0 |
| 13 | 5 | 6  | 2 | 45 | 48 | 46.5 | 465.0 | 202.5 | 262.5 | 1472.5 |
| 13 | 5 | 7  | 2 | 46 | 52 | 49.0 | 490.0 | 211.6 | 278.4 | 1750.9 |
| 13 | 5 | 8  | 2 | 48 | 50 | 49.0 | 490.0 | 230.4 | 259.6 | 2010.5 |

|    |   |    |   |    |    |      |       |       |        |        |
|----|---|----|---|----|----|------|-------|-------|--------|--------|
| 13 | 5 | 9  | 2 | 49 | 50 | 49.5 | 495.0 | 240.1 | 254.9  | 2265.4 |
| 13 | 5 | 10 | 2 | 50 | 51 | 50.5 | 505.0 | 250.0 | 255.0  | 2520.4 |
| 13 | 5 | 11 | 2 | 50 | 53 | 51.5 | 515.0 | 250.0 | 265.0  | 2785.4 |
| 13 | 5 | 12 | 2 | 50 | 50 | 50.0 | 500.0 | 250.0 | 250.0  | 3035.4 |
| 13 | 5 | 13 | 2 | 50 | 45 | 47.5 | 475.0 | 250.0 | 225.0  | 3260.4 |
| 13 | 5 | 14 | 2 | 45 | 48 | 46.5 | 465.0 | 202.5 | 262.5  | 3522.9 |
| 13 | 5 | 15 | 2 | 47 | 48 | 47.5 | 475.0 | 220.9 | 254.1  | 3777.0 |
| 13 | 5 | 16 | 2 | 48 | 49 | 48.5 | 485.0 | 230.4 | 254.6  | 4031.6 |
| 13 | 5 | 17 | 2 | 49 | 51 | 50.0 | 500.0 | 240.1 | 259.9  | 4291.5 |
| 13 | 5 | 18 | 2 | 50 | 52 | 51.0 | 510.0 | 250.0 | 260.0  | 4551.5 |
| 13 | 5 | 19 | 2 | 50 | 51 | 50.5 | 505.0 | 250.0 | 255.0  | 4806.5 |
| 13 | 5 | 20 | 2 | 50 | 52 | 51.0 | 510.0 | 250.0 | 260.0  | 5066.5 |
| 13 | 5 | 21 | 2 | 50 | 53 | 51.5 | 515.0 | 250.0 | 265.0  | 5331.5 |
| 13 | 5 | 22 | 2 | 50 | 50 | 50.0 | 500.0 | 250.0 | 250.0  | 5581.5 |
| 13 | 5 | 23 | 2 | 50 | 48 | 49.0 | 490.0 | 250.0 | 240.0  | 5821.5 |
| 13 | 5 | 24 | 2 | 49 | 48 | 48.5 | 485.0 | 240.1 | 244.9  | 6066.4 |
| 13 | 5 | 25 | 2 | 49 | 45 | 47.0 | 470.0 | 240.1 | 229.9  | 6296.3 |
| 13 | 5 | 26 | 2 | 48 | 44 | 46.0 | 460.0 | 230.4 | 229.6  | 6525.9 |
| 13 | 5 | 27 | 2 | 44 | 44 | 44.0 | 440.0 | 193.6 | 246.4  | 6772.3 |
| 13 | 5 | 28 | 2 | 44 | 42 | 43.0 | 430.0 | 193.6 | 236.4  | 7008.7 |
| 13 | 5 | 29 | 2 | 20 | 42 | 31.0 | 310.0 | 40.0  | 270.0  | 7278.7 |
| 13 | 5 | 30 | 2 | 10 | 1  | 5.5  | 55.0  | 10.0  | 45.0   | 7323.7 |
| 10 | 6 | 1  | 2 | 18 | 50 | 34.0 | 340.0 | 32.4  | 307.6  | 307.6  |
| 10 | 6 | 2  | 2 | 23 | 75 | 49.0 | 490.0 | 52.9  | 437.1  | 744.7  |
| 10 | 6 | 3  | 2 | 69 | 40 | 54.5 | 545.0 | 476.1 | 68.9   | 813.6  |
| 10 | 6 | 4  | 2 | 33 | 30 | 31.5 | 315.0 | 108.9 | 206.1  | 1019.7 |
| 10 | 6 | 5  | 2 | 48 | 45 | 46.5 | 465.0 | 230.4 | 234.6  | 1254.3 |
| 10 | 6 | 6  | 2 | 16 | 40 | 28.0 | 280.0 | 25.6  | 254.4  | 1508.7 |
| 10 | 6 | 7  | 2 | 24 | 50 | 37.0 | 370.0 | 57.6  | 312.4  | 1821.1 |
| 10 | 6 | 8  | 2 | 75 | 45 | 60.0 | 600.0 | 562.5 | 37.5   | 1858.6 |
| 10 | 6 | 9  | 2 | 88 | 40 | 64.0 | 640.0 | 774.4 | -134.4 | 1724.2 |
| 10 | 6 | 10 | 2 | 11 | 38 | 24.5 | 245.0 | 12.1  | 232.9  | 1957.1 |
| 10 | 6 | 11 | 2 | 13 | 40 | 26.5 | 265.0 | 16.9  | 248.1  | 2205.2 |
| 10 | 6 | 12 | 2 | 22 | 45 | 33.5 | 335.0 | 48.4  | 286.6  | 2491.8 |
| 10 | 6 | 13 | 2 | 28 | 50 | 39.0 | 390.0 | 78.4  | 311.6  | 2803.4 |

|    |   |    |   |    |    |      |       |       |       |        |
|----|---|----|---|----|----|------|-------|-------|-------|--------|
| 10 | 6 | 14 | 2 | 31 | 55 | 43.0 | 430.0 | 96.1  | 333.9 | 3137.3 |
| 10 | 6 | 15 | 2 | 37 | 40 | 38.5 | 385.0 | 136.9 | 248.1 | 3385.4 |
| 10 | 6 | 16 | 2 | 44 | 40 | 42.0 | 420.0 | 193.6 | 226.4 | 3611.8 |
| 10 | 6 | 17 | 2 | 3  | 45 | 24.0 | 240.0 | 0.9   | 239.1 | 3850.9 |
| 10 | 6 | 18 | 2 | 8  | 40 | 24.0 | 240.0 | 6.4   | 233.6 | 4084.5 |
| 10 | 6 | 19 | 2 | 45 | 40 | 42.5 | 425.0 | 202.5 | 222.5 | 4307.0 |
| 10 | 6 | 20 | 2 | 55 | 40 | 47.5 | 475.0 | 302.5 | 172.5 | 4479.5 |
| 10 | 6 | 21 | 2 | 65 | 40 | 52.5 | 525.0 | 422.5 | 102.5 | 4582.0 |
| 10 | 6 | 22 | 2 | 51 | 40 | 45.5 | 455.0 | 260.1 | 194.9 | 4776.9 |
| 10 | 6 | 23 | 2 | 40 | 39 | 39.5 | 395.0 | 160.0 | 235.0 | 5011.9 |
| 10 | 6 | 24 | 2 | 30 | 40 | 35.0 | 350.0 | 90.0  | 260.0 | 5271.9 |
| 10 | 6 | 25 | 2 | 27 | 39 | 33.0 | 330.0 | 72.9  | 257.1 | 5529.0 |
| 10 | 6 | 26 | 2 | 16 | 40 | 28.0 | 280.0 | 25.6  | 254.4 | 5783.4 |
| 10 | 6 | 27 | 2 | 29 | 41 | 35.0 | 350.0 | 84.1  | 265.9 | 6049.3 |
| 10 | 6 | 28 | 2 | 36 | 45 | 40.5 | 405.0 | 129.6 | 275.4 | 6324.7 |
| 10 | 6 | 29 | 2 | 47 | 50 | 48.5 | 485.0 | 220.9 | 264.1 | 6588.8 |
| 10 | 6 | 30 | 2 | 49 | 52 | 50.5 | 505.0 | 240.1 | 264.9 | 6853.7 |
| 14 | 6 | 1  | 2 | 50 | 18 | 34.0 | 340.0 | 250.0 | 90.0  | 90.0   |
| 14 | 6 | 2  | 2 | 75 | 23 | 49.0 | 490.0 | 562.5 | -72.5 | 17.5   |
| 14 | 6 | 3  | 2 | 40 | 69 | 54.5 | 545.0 | 160.0 | 385.0 | 402.5  |
| 14 | 6 | 4  | 2 | 30 | 33 | 31.5 | 315.0 | 90.0  | 225.0 | 627.5  |
| 14 | 6 | 5  | 2 | 45 | 48 | 46.5 | 465.0 | 202.5 | 262.5 | 890.0  |
| 14 | 6 | 6  | 2 | 40 | 16 | 28.0 | 280.0 | 160.0 | 120.0 | 1010.0 |
| 14 | 6 | 7  | 2 | 50 | 24 | 37.0 | 370.0 | 250.0 | 120.0 | 1130.0 |
| 14 | 6 | 8  | 2 | 45 | 75 | 60.0 | 600.0 | 202.5 | 397.5 | 1527.5 |
| 14 | 6 | 9  | 2 | 40 | 88 | 64.0 | 640.0 | 160.0 | 480.0 | 2007.5 |
| 14 | 6 | 10 | 2 | 38 | 11 | 24.5 | 245.0 | 144.4 | 100.6 | 2108.1 |
| 14 | 6 | 11 | 2 | 40 | 13 | 26.5 | 265.0 | 160.0 | 105.0 | 2213.1 |
| 14 | 6 | 12 | 2 | 45 | 22 | 33.5 | 335.0 | 202.5 | 132.5 | 2345.6 |
| 14 | 6 | 13 | 2 | 50 | 28 | 39.0 | 390.0 | 250.0 | 140.0 | 2485.6 |
| 14 | 6 | 14 | 2 | 55 | 31 | 43.0 | 430.0 | 302.5 | 127.5 | 2613.1 |
| 14 | 6 | 15 | 2 | 40 | 37 | 38.5 | 385.0 | 160.0 | 225.0 | 2838.1 |
| 14 | 6 | 16 | 2 | 40 | 44 | 42.0 | 420.0 | 160.0 | 260.0 | 3098.1 |
| 14 | 6 | 17 | 2 | 45 | 3  | 24.0 | 240.0 | 202.5 | 37.5  | 3135.6 |
| 14 | 6 | 18 | 2 | 40 | 8  | 24.0 | 240.0 | 160.0 | 80.0  | 3215.6 |

|    |   |    |   |    |    |      |       |       |        |        |
|----|---|----|---|----|----|------|-------|-------|--------|--------|
| 14 | 6 | 19 | 2 | 40 | 45 | 42.5 | 425.0 | 160.0 | 265.0  | 3480.6 |
| 14 | 6 | 20 | 2 | 40 | 55 | 47.5 | 475.0 | 160.0 | 315.0  | 3795.6 |
| 14 | 6 | 21 | 2 | 40 | 65 | 52.5 | 525.0 | 160.0 | 365.0  | 4160.6 |
| 14 | 6 | 22 | 2 | 40 | 51 | 45.5 | 455.0 | 160.0 | 295.0  | 4455.6 |
| 14 | 6 | 23 | 2 | 39 | 40 | 39.5 | 395.0 | 152.1 | 242.9  | 4698.5 |
| 14 | 6 | 24 | 2 | 40 | 30 | 35.0 | 350.0 | 160.0 | 190.0  | 4888.5 |
| 14 | 6 | 25 | 2 | 39 | 27 | 33.0 | 330.0 | 152.1 | 177.9  | 5066.4 |
| 14 | 6 | 26 | 2 | 40 | 16 | 28.0 | 280.0 | 160.0 | 120.0  | 5186.4 |
| 14 | 6 | 27 | 2 | 41 | 29 | 35.0 | 350.0 | 168.1 | 181.9  | 5368.3 |
| 14 | 6 | 28 | 2 | 45 | 36 | 40.5 | 405.0 | 202.5 | 202.5  | 5570.8 |
| 14 | 6 | 29 | 2 | 50 | 47 | 48.5 | 485.0 | 250.0 | 235.0  | 5805.8 |
| 14 | 6 | 30 | 2 | 52 | 49 | 50.5 | 505.0 | 270.4 | 234.6  | 6040.4 |
| 11 | 7 | 1  | 2 | 99 | 60 | 79.5 | 795.0 | 980.1 | -185.1 | -185.1 |
| 11 | 7 | 2  | 2 | 70 | 50 | 60.0 | 600.0 | 490.0 | 110.0  | -75.1  |
| 11 | 7 | 3  | 2 | 50 | 40 | 45.0 | 450.0 | 250.0 | 200.0  | 124.9  |
| 11 | 7 | 4  | 2 | 30 | 30 | 30.0 | 300.0 | 90.0  | 210.0  | 334.9  |
| 11 | 7 | 5  | 2 | 1  | 0  | 0.5  | 5.0   | 0.1   | 4.9    | 339.8  |
| 11 | 7 | 6  | 2 | 20 | 50 | 35.0 | 350.0 | 40.0  | 310.0  | 649.8  |
| 11 | 7 | 7  | 2 | 25 | 70 | 47.5 | 475.0 | 62.5  | 412.5  | 1062.3 |
| 11 | 7 | 8  | 2 | 30 | 80 | 55.0 | 550.0 | 90.0  | 460.0  | 1522.3 |
| 11 | 7 | 9  | 2 | 35 | 60 | 47.5 | 475.0 | 122.5 | 352.5  | 1874.8 |
| 11 | 7 | 10 | 2 | 25 | 60 | 42.5 | 425.0 | 62.5  | 362.5  | 2237.3 |
| 11 | 7 | 11 | 2 | 29 | 50 | 39.5 | 395.0 | 84.1  | 310.9  | 2548.2 |
| 11 | 7 | 12 | 2 | 20 | 40 | 30.0 | 300.0 | 40.0  | 260.0  | 2808.2 |
| 11 | 7 | 13 | 2 | 30 | 50 | 40.0 | 400.0 | 90.0  | 310.0  | 3118.2 |
| 11 | 7 | 14 | 2 | 30 | 30 | 30.0 | 300.0 | 90.0  | 210.0  | 3328.2 |
| 11 | 7 | 15 | 2 | 29 | 30 | 29.5 | 295.0 | 84.1  | 210.9  | 3539.1 |
| 11 | 7 | 16 | 2 | 20 | 30 | 25.0 | 250.0 | 40.0  | 210.0  | 3749.1 |
| 11 | 7 | 17 | 2 | 40 | 15 | 27.5 | 275.0 | 160.0 | 115.0  | 3864.1 |
| 11 | 7 | 18 | 2 | 25 | 40 | 32.5 | 325.0 | 62.5  | 262.5  | 4126.6 |
| 11 | 7 | 19 | 2 | 30 | 15 | 22.5 | 225.0 | 90.0  | 135.0  | 4261.6 |
| 11 | 7 | 20 | 2 | 20 | 20 | 20.0 | 200.0 | 40.0  | 160.0  | 4421.6 |
| 11 | 7 | 21 | 2 | 25 | 18 | 21.5 | 215.0 | 62.5  | 152.5  | 4574.1 |
| 11 | 7 | 22 | 2 | 30 | 22 | 26.0 | 260.0 | 90.0  | 170.0  | 4744.1 |
| 11 | 7 | 23 | 2 | 30 | 25 | 27.5 | 275.0 | 90.0  | 185.0  | 4929.1 |

|    |   |    |   |    |    |      |       |       |       |        |
|----|---|----|---|----|----|------|-------|-------|-------|--------|
| 11 | 7 | 24 | 2 | 20 | 27 | 23.5 | 235.0 | 40.0  | 195.0 | 5124.1 |
| 11 | 7 | 25 | 2 | 15 | 18 | 16.5 | 165.0 | 22.5  | 142.5 | 5266.6 |
| 11 | 7 | 26 | 2 | 20 | 18 | 19.0 | 190.0 | 40.0  | 150.0 | 5416.6 |
| 11 | 7 | 27 | 2 | 30 | 20 | 25.0 | 250.0 | 90.0  | 160.0 | 5576.6 |
| 11 | 7 | 28 | 2 | 33 | 25 | 29.0 | 290.0 | 108.9 | 181.1 | 5757.7 |
| 11 | 7 | 29 | 2 | 35 | 30 | 32.5 | 325.0 | 122.5 | 202.5 | 5960.2 |
| 11 | 7 | 30 | 2 | 37 | 50 | 43.5 | 435.0 | 136.9 | 298.1 | 6258.3 |
| 15 | 7 | 1  | 2 | 60 | 99 | 79.5 | 795.0 | 360.0 | 435.0 | 435.0  |
| 15 | 7 | 2  | 2 | 50 | 70 | 60.0 | 600.0 | 250.0 | 350.0 | 785.0  |
| 15 | 7 | 3  | 2 | 40 | 50 | 45.0 | 450.0 | 160.0 | 290.0 | 1075.0 |
| 15 | 7 | 4  | 2 | 30 | 30 | 30.0 | 300.0 | 90.0  | 210.0 | 1285.0 |
| 15 | 7 | 5  | 2 | 0  | 1  | 0.5  | 5.0   | 0.0   | 5.0   | 1290.0 |
| 15 | 7 | 6  | 2 | 50 | 20 | 35.0 | 350.0 | 250.0 | 100.0 | 1390.0 |
| 15 | 7 | 7  | 2 | 70 | 25 | 47.5 | 475.0 | 490.0 | -15.0 | 1375.0 |
| 15 | 7 | 8  | 2 | 80 | 30 | 55.0 | 550.0 | 640.0 | -90.0 | 1285.0 |
| 15 | 7 | 9  | 2 | 60 | 35 | 47.5 | 475.0 | 360.0 | 115.0 | 1400.0 |
| 15 | 7 | 10 | 2 | 60 | 25 | 42.5 | 425.0 | 360.0 | 65.0  | 1465.0 |
| 15 | 7 | 11 | 2 | 50 | 29 | 39.5 | 395.0 | 250.0 | 145.0 | 1610.0 |
| 15 | 7 | 12 | 2 | 40 | 20 | 30.0 | 300.0 | 160.0 | 140.0 | 1750.0 |
| 15 | 7 | 13 | 2 | 50 | 30 | 40.0 | 400.0 | 250.0 | 150.0 | 1900.0 |
| 15 | 7 | 14 | 2 | 30 | 30 | 30.0 | 300.0 | 90.0  | 210.0 | 2110.0 |
| 15 | 7 | 15 | 2 | 30 | 29 | 29.5 | 295.0 | 90.0  | 205.0 | 2315.0 |
| 15 | 7 | 16 | 2 | 30 | 20 | 25.0 | 250.0 | 90.0  | 160.0 | 2475.0 |
| 15 | 7 | 17 | 2 | 15 | 40 | 27.5 | 275.0 | 22.5  | 252.5 | 2727.5 |
| 15 | 7 | 18 | 2 | 40 | 25 | 32.5 | 325.0 | 160.0 | 165.0 | 2892.5 |
| 15 | 7 | 19 | 2 | 15 | 30 | 22.5 | 225.0 | 22.5  | 202.5 | 3095.0 |
| 15 | 7 | 20 | 2 | 20 | 20 | 20.0 | 200.0 | 40.0  | 160.0 | 3255.0 |
| 15 | 7 | 21 | 2 | 18 | 25 | 21.5 | 215.0 | 32.4  | 182.6 | 3437.6 |
| 15 | 7 | 22 | 2 | 22 | 30 | 26.0 | 260.0 | 48.4  | 211.6 | 3649.2 |
| 15 | 7 | 23 | 2 | 25 | 30 | 27.5 | 275.0 | 62.5  | 212.5 | 3861.7 |
| 15 | 7 | 24 | 2 | 27 | 20 | 23.5 | 235.0 | 72.9  | 162.1 | 4023.8 |
| 15 | 7 | 25 | 2 | 18 | 15 | 16.5 | 165.0 | 32.4  | 132.6 | 4156.4 |
| 15 | 7 | 26 | 2 | 18 | 20 | 19.0 | 190.0 | 32.4  | 157.6 | 4314.0 |
| 15 | 7 | 27 | 2 | 20 | 30 | 25.0 | 250.0 | 40.0  | 210.0 | 4524.0 |
| 15 | 7 | 28 | 2 | 25 | 33 | 29.0 | 290.0 | 62.5  | 227.5 | 4751.5 |

|    |   |    |   |    |     |      |       |       |       |        |
|----|---|----|---|----|-----|------|-------|-------|-------|--------|
| 15 | 7 | 29 | 2 | 30 | 35  | 32.5 | 325.0 | 90.0  | 235.0 | 4986.5 |
| 15 | 7 | 30 | 2 | 50 | 37  | 43.5 | 435.0 | 250.0 | 185.0 | 5171.5 |
| 12 | 8 | 1  | 2 | 50 | 1   | 25.5 | 255.0 | 250.0 | 5.0   | 5.0    |
| 12 | 8 | 2  | 2 | 10 | 1   | 5.5  | 55.0  | 10.0  | 45.0  | 50.0   |
| 12 | 8 | 3  | 2 | 10 | 1   | 5.5  | 55.0  | 10.0  | 45.0  | 95.0   |
| 12 | 8 | 4  | 2 | 1  | 1   | 1.0  | 10.0  | 0.1   | 9.9   | 104.9  |
| 12 | 8 | 5  | 2 | 15 | 10  | 12.5 | 125.0 | 22.5  | 102.5 | 207.4  |
| 12 | 8 | 6  | 2 | 10 | 50  | 30.0 | 300.0 | 10.0  | 290.0 | 497.4  |
| 12 | 8 | 7  | 2 | 25 | 50  | 37.5 | 375.0 | 62.5  | 312.5 | 809.9  |
| 12 | 8 | 8  | 2 | 35 | 50  | 42.5 | 425.0 | 122.5 | 302.5 | 1112.4 |
| 12 | 8 | 9  | 2 | 30 | 50  | 40.0 | 400.0 | 90.0  | 310.0 | 1422.4 |
| 12 | 8 | 10 | 2 | 32 | 30  | 31.0 | 310.0 | 102.4 | 207.6 | 1630.0 |
| 12 | 8 | 11 | 2 | 20 | 100 | 60.0 | 600.0 | 40.0  | 560.0 | 2190.0 |
| 12 | 8 | 12 | 2 | 40 | 50  | 45.0 | 450.0 | 160.0 | 290.0 | 2480.0 |
| 12 | 8 | 13 | 2 | 45 | 50  | 47.5 | 475.0 | 202.5 | 272.5 | 2752.5 |
| 12 | 8 | 14 | 2 | 35 | 50  | 42.5 | 425.0 | 122.5 | 302.5 | 3055.0 |
| 12 | 8 | 15 | 2 | 40 | 50  | 45.0 | 450.0 | 160.0 | 290.0 | 3345.0 |
| 12 | 8 | 16 | 2 | 40 | 50  | 45.0 | 450.0 | 160.0 | 290.0 | 3635.0 |
| 12 | 8 | 17 | 2 | 45 | 55  | 50.0 | 500.0 | 202.5 | 297.5 | 3932.5 |
| 12 | 8 | 18 | 2 | 40 | 55  | 47.5 | 475.0 | 160.0 | 315.0 | 4247.5 |
| 12 | 8 | 19 | 2 | 44 | 55  | 49.5 | 495.0 | 193.6 | 301.4 | 4548.9 |
| 12 | 8 | 20 | 2 | 40 | 45  | 42.5 | 425.0 | 160.0 | 265.0 | 4813.9 |
| 12 | 8 | 21 | 2 | 35 | 40  | 37.5 | 375.0 | 122.5 | 252.5 | 5066.4 |
| 12 | 8 | 22 | 2 | 35 | 35  | 35.0 | 350.0 | 122.5 | 227.5 | 5293.9 |
| 12 | 8 | 23 | 2 | 30 | 35  | 32.5 | 325.0 | 90.0  | 235.0 | 5528.9 |
| 12 | 8 | 24 | 2 | 40 | 30  | 35.0 | 350.0 | 160.0 | 190.0 | 5718.9 |
| 12 | 8 | 25 | 2 | 35 | 35  | 35.0 | 350.0 | 122.5 | 227.5 | 5946.4 |
| 12 | 8 | 26 | 2 | 35 | 35  | 35.0 | 350.0 | 122.5 | 227.5 | 6173.9 |
| 12 | 8 | 27 | 2 | 35 | 35  | 35.0 | 350.0 | 122.5 | 227.5 | 6401.4 |
| 12 | 8 | 28 | 2 | 35 | 35  | 35.0 | 350.0 | 122.5 | 227.5 | 6628.9 |
| 12 | 8 | 29 | 2 | 35 | 35  | 35.0 | 350.0 | 122.5 | 227.5 | 6856.4 |
| 12 | 8 | 30 | 2 | 35 | 1   | 18.0 | 180.0 | 122.5 | 57.5  | 6913.9 |
| 16 | 8 | 1  | 2 | 1  | 50  | 25.5 | 255.0 | 0.1   | 254.9 | 254.9  |
| 16 | 8 | 2  | 2 | 1  | 10  | 5.5  | 55.0  | 0.1   | 54.9  | 309.8  |
| 16 | 8 | 3  | 2 | 1  | 10  | 5.5  | 55.0  | 0.1   | 54.9  | 364.7  |

|    |   |    |   |     |    |      |       |        |        |        |
|----|---|----|---|-----|----|------|-------|--------|--------|--------|
| 16 | 8 | 4  | 2 | 1   | 1  | 1.0  | 10.0  | 0.1    | 9.9    | 374.6  |
| 16 | 8 | 5  | 2 | 10  | 15 | 12.5 | 125.0 | 10.0   | 115.0  | 489.6  |
| 16 | 8 | 6  | 2 | 50  | 10 | 30.0 | 300.0 | 250.0  | 50.0   | 539.6  |
| 16 | 8 | 7  | 2 | 50  | 25 | 37.5 | 375.0 | 250.0  | 125.0  | 664.6  |
| 16 | 8 | 8  | 2 | 50  | 35 | 42.5 | 425.0 | 250.0  | 175.0  | 839.6  |
| 16 | 8 | 9  | 2 | 50  | 30 | 40.0 | 400.0 | 250.0  | 150.0  | 989.6  |
| 16 | 8 | 10 | 2 | 30  | 32 | 31.0 | 310.0 | 90.0   | 220.0  | 1209.6 |
| 16 | 8 | 11 | 2 | 100 | 20 | 60.0 | 600.0 | 1000.0 | -400.0 | 809.6  |
| 16 | 8 | 12 | 2 | 50  | 40 | 45.0 | 450.0 | 250.0  | 200.0  | 1009.6 |
| 16 | 8 | 13 | 2 | 50  | 45 | 47.5 | 475.0 | 250.0  | 225.0  | 1234.6 |
| 16 | 8 | 14 | 2 | 50  | 35 | 42.5 | 425.0 | 250.0  | 175.0  | 1409.6 |
| 16 | 8 | 15 | 2 | 50  | 40 | 45.0 | 450.0 | 250.0  | 200.0  | 1609.6 |
| 16 | 8 | 16 | 2 | 50  | 40 | 45.0 | 450.0 | 250.0  | 200.0  | 1809.6 |
| 16 | 8 | 17 | 2 | 55  | 45 | 50.0 | 500.0 | 302.5  | 197.5  | 2007.1 |
| 16 | 8 | 18 | 2 | 55  | 40 | 47.5 | 475.0 | 302.5  | 172.5  | 2179.6 |
| 16 | 8 | 19 | 2 | 55  | 44 | 49.5 | 495.0 | 302.5  | 192.5  | 2372.1 |
| 16 | 8 | 20 | 2 | 45  | 40 | 42.5 | 425.0 | 202.5  | 222.5  | 2594.6 |
| 16 | 8 | 21 | 2 | 40  | 35 | 37.5 | 375.0 | 160.0  | 215.0  | 2809.6 |
| 16 | 8 | 22 | 2 | 35  | 35 | 35.0 | 350.0 | 122.5  | 227.5  | 3037.1 |
| 16 | 8 | 23 | 2 | 35  | 30 | 32.5 | 325.0 | 122.5  | 202.5  | 3239.6 |
| 16 | 8 | 24 | 2 | 30  | 40 | 35.0 | 350.0 | 90.0   | 260.0  | 3499.6 |
| 16 | 8 | 25 | 2 | 35  | 35 | 35.0 | 350.0 | 122.5  | 227.5  | 3727.1 |
| 16 | 8 | 26 | 2 | 35  | 35 | 35.0 | 350.0 | 122.5  | 227.5  | 3954.6 |
| 16 | 8 | 27 | 2 | 35  | 35 | 35.0 | 350.0 | 122.5  | 227.5  | 4182.1 |
| 16 | 8 | 28 | 2 | 35  | 35 | 35.0 | 350.0 | 122.5  | 227.5  | 4409.6 |
| 16 | 8 | 29 | 2 | 35  | 35 | 35.0 | 350.0 | 122.5  | 227.5  | 4637.1 |
| 16 | 8 | 30 | 2 | 1   | 35 | 18.0 | 180.0 | 0.1    | 179.9  | 4817.0 |
