# Supplementary material
Source: MDPI journal article supplement (https://www.mdpi.com/2073-4336/2/3/277)
Supplement: s1 [file s1]

# Teaming Instructions for VOLUNTARY ASYM

## Instructions

You are participating in a decision-making experiment where you have the opportunity to earn money. How much money you earn depends on your own decisions, but may also depend on those of other participants.

You will make individual decisions at your computer. From now on, please do not talk with other participants until the end of the experiment.

In the experiment, you will be anonymously paired with another participant to form a group of two. The experiment consists of 30 repetitions, called periods. You will stay in the same group with the same other participant during all 30 periods. In each of the periods, you will be in the same decision situation.

A period consists of two decision stages. We start by describing the second stage. In this stage, each participant has to choose an effort, which is an integer number between 0 and 100. The effort incurs a cost measured in Experimental Currency Units (ECU). The two members in each group have different effort costs. For one of the two group members, the effort cost is equal to the square of the chosen effort divided by 10, while for the other it is equal to the square of the chosen effort divided by 8. Tables 1 and 1A below show for the two group members, respectively, the cost of each effort level between 1 and 100. Zero effort implies zero cost.

At the beginning of the experiment, you will find an envelope with your personal effort cost table at your computer terminal. One of the two members in each group will find Table 1 (cost equals squared effort divided by 10), while the other will find Table 1A (cost equals squared effort divided by 8).

In the first stage of each period, you have to choose between two modes of remuneration: a private remuneration mode and a joint remuneration mode. The remuneration mode will determine how you will be compensated for your effort.

- If you choose the private remuneration mode, you will be paid 7 ECU per effort unit that you individually choose in the second stage. The other group member will be paid 7 ECU per effort unit that he or she chooses in the second stage.
- If both you and the anonymous other group member choose the joint remuneration mode, each of you will be paid based on the average effort in your group in the second stage. Each of you will be paid 8 ECU per unit of the average effort by you and the other group member.
- If you choose the joint remuneration mode, but the anonymous other group member chooses the private remuneration mode, you will both adhere to the private remuneration mode. You will be paid 7 ECU per effort unit that you individually choose in the second stage. The other group member will be paid 7 ECU per effort unit that he or she chooses in the second stage.

## Your earnings

Your profit (in ECU) in a period is determined as follows.

- If you are in the private remuneration mode, your profit is determined by your individual effort multiplied by 7 ECU minus the cost of your individual effort in ECU. Below you find Table 2 (cost equals squared effort divided by 10) and 2A (cost equals squared effort divided by 8) that

show for each level of individual effort the corresponding cost and the profit under private remuneration. Those of you who will find Table 1 in the envelope at the beginning of the experiment will also be provided with Table 2 while those who will find Table 1a will also be provided with Table 2A.

- If you are in the joint remuneration mode, your profit is determined by the average effort by you and the other group member, multiplied by 8 ECU, minus the cost of your individual effort in ECU.

Your total profit for the experiment equals the sum of your profits over the 30 periods. At the end of the experiment, your total profit will be converted to Canadian dollars with a conversion rate of 50 cents per 100 ECU.

### **Available Information**

At the end of the first stage of each period, you are told whether you are in private or joint remuneration mode.

At the beginning of each period (except for the first one), you are informed of your result in the previous period. This includes the remuneration mode that you chose, the remuneration mode that the other chose, the effective remuneration mode, your individual effort, the average effort in the joint remuneration mode (if applicable), your effort cost, your profit and your cumulated profit over all previous periods.

At any time, by clicking on the magnifying glass icon on your screen, you can access a table of your results in all previous periods. The table shows the results of the first period in the top line and the results of subsequent periods underneath.

Before we begin the experiment, we ask you to answer some comprehension questions regarding these instructions. Everybody must answer all of the questions correctly before we carry on.

**Table 1.** Individual effort cost (Effort level squared and divided by 10).

| Effort level | Effort cost | Effort level | Effort cost |
|--------------|-------------|--------------|-------------|
| 1            | 0.10        | 51           | 260.10      |
| 2            | 0.40        | 52           | 270.40      |
| 3            | 0.90        | 53           | 280.90      |
| 4            | 1.60        | 54           | 291.60      |
| 5            | 2.50        | 55           | 302.50      |
| 6            | 3.60        | 56           | 313.60      |
| 7            | 4.90        | 57           | 624.90      |
| 8            | 6.40        | 58           | 336.40      |
| 9            | 8.10        | 59           | 348.10      |
| 10           | 10.00       | 60           | 360.00      |
| 11           | 12.10       | 61           | 372.10      |
| 12           | 14.40       | 62           | 384.40      |
| 13           | 16.90       | 63           | 396.90      |
| 14           | 19.60       | 64           | 409.60      |
| 15           | 22.50       | 65           | 422.50      |
| 16           | 25.60       | 66           | 435.60      |
| 17           | 28.90       | 67           | 448.90      |
| 18           | 32.40       | 68           | 462.40      |
| 19           | 36.10       | 69           | 476.10      |
| 20           | 40.00       | 70           | 490.00      |
| 21           | 44.10       | 71           | 504.10      |
| 22           | 48.40       | 72           | 518.40      |
| 23           | 52.90       | 73           | 532.90      |
| 24           | 57.60       | 74           | 547.60      |
| 25           | 62.50       | 75           | 562.50      |
| 26           | 67.60       | 76           | 577.60      |
| 27           | 72.90       | 77           | 592.90      |
| 28           | 78.40       | 78           | 608.40      |
| 29           | 84.10       | 79           | 624.10      |
| 30           | 90.00       | 80           | 640.00      |
| 31           | 96.10       | 81           | 656.10      |
| 32           | 102.40      | 82           | 672.40      |
| 33           | 108.90      | 83           | 688.90      |
| 34           | 115.60      | 84           | 705.60      |
| 35           | 122.50      | 85           | 722.50      |
| 36           | 129.60      | 86           | 739.60      |
| 37           | 136.90      | 87           | 756.90      |
| 38           | 144.40      | 88           | 774.40      |
| 39           | 152.10      | 89           | 792.10      |
| 40           | 160.00      | 90           | 810.00      |
| 41           | 168.10      | 91           | 828.10      |
| 42           | 176.40      | 92           | 846.40      |
| 43           | 184.90      | 93           | 864.90      |
| 44           | 193.60      | 94           | 883.60      |
| 45           | 202.50      | 95           | 802.50      |
| 46           | 211.60      | 96           | 921.60      |
| 47           | 220.90      | 97           | 940.90      |
| 48           | 230.40      | 98           | 960.40      |
| 49           | 240.10      | 99           | 980.10      |
| 50           | 250.00      | 100          | 1000.00     |

**Table 1A.** Individual effort cost (Effort level squared and divided by 8).

| <b>Effort level</b> | <b>Effort cost</b> | <b>Effort level</b> | <b>Effort cost</b> |
|---------------------|--------------------|---------------------|--------------------|
| <b>1</b>            | 0.13               | <b>51</b>           | 325.13             |
| <b>2</b>            | 0.50               | <b>52</b>           | 338.00             |
| <b>3</b>            | 1.13               | <b>53</b>           | 351.13             |
| <b>4</b>            | 2.00               | <b>54</b>           | 364.50             |
| <b>5</b>            | 3.13               | <b>55</b>           | 378.13             |
| <b>6</b>            | 4.50               | <b>56</b>           | 392.00             |
| <b>7</b>            | 6.13               | <b>57</b>           | 406.13             |
| <b>8</b>            | 8.00               | <b>58</b>           | 420.50             |
| <b>9</b>            | 10.13              | <b>59</b>           | 435.13             |
| <b>10</b>           | 12.50              | <b>60</b>           | 450.00             |
| <b>11</b>           | 15.13              | <b>61</b>           | 465.13             |
| <b>12</b>           | 18.00              | <b>62</b>           | 480.50             |
| <b>13</b>           | 21.13              | <b>63</b>           | 496.13             |
| <b>14</b>           | 24.50              | <b>64</b>           | 512.00             |
| <b>15</b>           | 28.13              | <b>65</b>           | 528.13             |
| <b>16</b>           | 32.00              | <b>66</b>           | 544.50             |
| <b>17</b>           | 36.13              | <b>67</b>           | 561.13             |
| <b>18</b>           | 40.50              | <b>68</b>           | 578.00             |
| <b>19</b>           | 45.13              | <b>69</b>           | 595.13             |
| <b>20</b>           | 50.00              | <b>70</b>           | 612.50             |
| <b>21</b>           | 55.13              | <b>71</b>           | 630.13             |
| <b>22</b>           | 60.50              | <b>72</b>           | 648.00             |
| <b>23</b>           | 66.13              | <b>73</b>           | 666.13             |
| <b>24</b>           | 72.00              | <b>74</b>           | 684.50             |
| <b>25</b>           | 78.13              | <b>75</b>           | 703.13             |
| <b>26</b>           | 84.50              | <b>76</b>           | 722.00             |
| <b>27</b>           | 91.13              | <b>77</b>           | 741.13             |
| <b>28</b>           | 98.00              | <b>78</b>           | 760.50             |
| <b>29</b>           | 105.13             | <b>79</b>           | 780.13             |
| <b>30</b>           | 112.50             | <b>80</b>           | 800.00             |
| <b>31</b>           | 120.13             | <b>81</b>           | 820.13             |
| <b>32</b>           | 128.00             | <b>82</b>           | 840.50             |
| <b>33</b>           | 136.13             | <b>83</b>           | 861.13             |
| <b>34</b>           | 144.50             | <b>84</b>           | 882.00             |
| <b>35</b>           | 153.13             | <b>85</b>           | 903.13             |
| <b>36</b>           | 162.00             | <b>86</b>           | 924.50             |
| <b>37</b>           | 171.13             | <b>87</b>           | 946.13             |
| <b>38</b>           | 180.50             | <b>88</b>           | 968.00             |
| <b>39</b>           | 190.13             | <b>89</b>           | 990.13             |
| <b>40</b>           | 200.00             | <b>90</b>           | 1012.50            |
| <b>41</b>           | 210.13             | <b>91</b>           | 1035.13            |
| <b>42</b>           | 220.50             | <b>92</b>           | 1058.00            |
| <b>43</b>           | 231.13             | <b>93</b>           | 1081.13            |
| <b>44</b>           | 242.00             | <b>94</b>           | 1104.50            |
| <b>45</b>           | 253.13             | <b>95</b>           | 1128.13            |
| <b>46</b>           | 264.50             | <b>96</b>           | 1152.00            |
| <b>47</b>           | 276.13             | <b>97</b>           | 1176.13            |
| <b>48</b>           | 288.00             | <b>98</b>           | 1200.50            |
| <b>49</b>           | 300.13             | <b>99</b>           | 1225.13            |
| <b>50</b>           | 312.50             | <b>100</b>          | 1250.00            |

**Table 2.** Profit in the private mode (Cost equals squared effort level divided by 10).

| <b>Effort level</b> | <b>Effort cost</b> | <b>Profit</b> | <b>Effort level</b> | <b>Effort cost</b> | <b>Profit</b> |
|---------------------|--------------------|---------------|---------------------|--------------------|---------------|
| <b>1</b>            | 0.10               | 6.90          | <b>51</b>           | 260.10             | 96.90         |
| <b>2</b>            | 0.40               | 13.60         | <b>52</b>           | 270.40             | 93.60         |
| <b>3</b>            | 0.90               | 20.10         | <b>53</b>           | 280.90             | 90.10         |
| <b>4</b>            | 1.60               | 26.40         | <b>54</b>           | 291.60             | 86.40         |
| <b>5</b>            | 2.50               | 32.50         | <b>55</b>           | 302.50             | 82.50         |
| <b>6</b>            | 3.60               | 38.40         | <b>56</b>           | 313.60             | 78.40         |
| <b>7</b>            | 4.90               | 44.10         | <b>57</b>           | 624.90             | 74.10         |
| <b>8</b>            | 6.40               | 49.60         | <b>58</b>           | 336.40             | 69.60         |
| <b>9</b>            | 8.10               | 54.90         | <b>59</b>           | 348.10             | 64.90         |
| <b>10</b>           | 10.00              | 60.00         | <b>60</b>           | 360.00             | 60.00         |
| <b>11</b>           | 12.10              | 64.90         | <b>61</b>           | 372.10             | 54.90         |
| <b>12</b>           | 14.40              | 69.60         | <b>62</b>           | 384.40             | 49.60         |
| <b>13</b>           | 16.90              | 74.10         | <b>63</b>           | 396.90             | 44.10         |
| <b>14</b>           | 19.60              | 78.40         | <b>64</b>           | 409.60             | 38.40         |
| <b>15</b>           | 22.50              | 82.50         | <b>65</b>           | 422.50             | 32.50         |
| <b>16</b>           | 25.60              | 86.40         | <b>66</b>           | 435.60             | 26.40         |
| <b>17</b>           | 28.90              | 90.10         | <b>67</b>           | 448.90             | 20.10         |
| <b>18</b>           | 32.40              | 93.60         | <b>68</b>           | 462.40             | 13.60         |
| <b>19</b>           | 36.10              | 96.90         | <b>69</b>           | 476.10             | 6.90          |
| <b>20</b>           | 40.00              | 100.00        | <b>70</b>           | 490.00             | 0.00          |
| <b>21</b>           | 44.10              | 102.90        | <b>71</b>           | 504.10             | -7.10         |
| <b>22</b>           | 48.40              | 105.60        | <b>72</b>           | 518.40             | -14.40        |
| <b>23</b>           | 52.90              | 108.10        | <b>73</b>           | 532.90             | -21.90        |
| <b>24</b>           | 57.60              | 110.40        | <b>74</b>           | 547.60             | -29.60        |
| <b>25</b>           | 62.50              | 112.50        | <b>75</b>           | 562.50             | -37.50        |
| <b>26</b>           | 67.60              | 114.40        | <b>76</b>           | 577.60             | -45.60        |
| <b>27</b>           | 72.90              | 116.10        | <b>77</b>           | 592.90             | -53.90        |
| <b>28</b>           | 78.40              | 117.60        | <b>78</b>           | 608.40             | -62.40        |
| <b>29</b>           | 84.10              | 118.90        | <b>79</b>           | 624.10             | -71.10        |
| <b>30</b>           | 90.00              | 120.00        | <b>80</b>           | 640.00             | -80.00        |
| <b>31</b>           | 96.10              | 120.90        | <b>81</b>           | 656.10             | -89.10        |
| <b>32</b>           | 102.40             | 121.60        | <b>82</b>           | 672.40             | -98.40        |
| <b>33</b>           | 108.90             | 122.10        | <b>83</b>           | 688.90             | -107.60       |
| <b>34</b>           | 115.60             | 122.40        | <b>84</b>           | 705.60             | -117.60       |
| <b>35</b>           | 122.50             | 122.50        | <b>85</b>           | 722.50             | -127.50       |
| <b>36</b>           | 129.60             | 122.40        | <b>86</b>           | 739.60             | -137.60       |
| <b>37</b>           | 136.90             | 122.10        | <b>87</b>           | 756.90             | -147.90       |
| <b>38</b>           | 144.40             | 121.60        | <b>88</b>           | 774.40             | -158.40       |
| <b>39</b>           | 152.10             | 120.90        | <b>89</b>           | 792.10             | -169.10       |
| <b>40</b>           | 160.00             | 120.00        | <b>90</b>           | 810.00             | -180.00       |
| <b>41</b>           | 168.10             | 118.90        | <b>91</b>           | 828.10             | -191.10       |
| <b>42</b>           | 176.40             | 117.60        | <b>92</b>           | 846.40             | -202.40       |
| <b>43</b>           | 184.90             | 116.10        | <b>93</b>           | 864.90             | -213.90       |
| <b>44</b>           | 193.60             | 114.40        | <b>94</b>           | 883.60             | -225.60       |
| <b>45</b>           | 202.50             | 112.50        | <b>95</b>           | 802.50             | -237.50       |
| <b>46</b>           | 211.60             | 110.40        | <b>96</b>           | 921.60             | -249.60       |
| <b>47</b>           | 220.90             | 108.10        | <b>97</b>           | 940.90             | -261.90       |
| <b>48</b>           | 230.40             | 105.60        | <b>98</b>           | 960.40             | -274.40       |
| <b>49</b>           | 240.10             | 102.90        | <b>99</b>           | 980.10             | -287.10       |
| <b>50</b>           | 250.00             | 100.00        | <b>100</b>          | 1000.00            | -300.00       |

**Table 2A.** Profit in the private mode (Cost equals squared effort level divided by 8).

| <b>Effort level</b> | <b>Effort cost</b> | <b>Profit</b> | <b>Effort level</b> | <b>Effort cost</b> | <b>Profit</b> |
|---------------------|--------------------|---------------|---------------------|--------------------|---------------|
| <b>1</b>            | 0.13               | 6.88          | <b>51</b>           | 325.13             | 31.88         |
| <b>2</b>            | 0.50               | 13.50         | <b>52</b>           | 338.00             | 26.00         |
| <b>3</b>            | 1.13               | 19.88         | <b>53</b>           | 351.13             | 19.88         |
| <b>4</b>            | 2.00               | 26.00         | <b>54</b>           | 364.50             | 13.50         |
| <b>5</b>            | 3.13               | 31.88         | <b>55</b>           | 378.13             | 6.88          |
| <b>6</b>            | 4.50               | 37.50         | <b>56</b>           | 392.00             | 0.00          |
| <b>7</b>            | 6.13               | 42.88         | <b>57</b>           | 406.13             | -7.13         |
| <b>8</b>            | 8.00               | 48.00         | <b>58</b>           | 420.50             | -14.50        |
| <b>9</b>            | 10.13              | 52.88         | <b>59</b>           | 435.13             | -22.13        |
| <b>10</b>           | 12.50              | 57.50         | <b>60</b>           | 450.00             | -30.00        |
| <b>11</b>           | 15.13              | 61.88         | <b>61</b>           | 465.13             | -38.13        |
| <b>12</b>           | 18.00              | 66.00         | <b>62</b>           | 480.50             | -46.50        |
| <b>13</b>           | 21.13              | 69.88         | <b>63</b>           | 496.13             | -55.13        |
| <b>14</b>           | 24.50              | 73.50         | <b>64</b>           | 512.00             | -64.00        |
| <b>15</b>           | 28.13              | 76.88         | <b>65</b>           | 528.13             | -73.13        |
| <b>16</b>           | 32.00              | 80.00         | <b>66</b>           | 544.50             | -82.50        |
| <b>17</b>           | 36.13              | 82.88         | <b>67</b>           | 561.13             | -92.13        |
| <b>18</b>           | 40.50              | 85.50         | <b>68</b>           | 578.00             | -102.00       |
| <b>19</b>           | 45.13              | 87.88         | <b>69</b>           | 595.13             | -112.13       |
| <b>20</b>           | 50.00              | 90.00         | <b>70</b>           | 612.50             | -122.50       |
| <b>21</b>           | 55.13              | 91.88         | <b>71</b>           | 630.13             | -133.13       |
| <b>22</b>           | 60.50              | 93.50         | <b>72</b>           | 648.00             | -144.00       |
| <b>23</b>           | 66.13              | 94.88         | <b>73</b>           | 666.13             | -155.13       |
| <b>24</b>           | 72.00              | 96.00         | <b>74</b>           | 684.50             | -166.50       |
| <b>25</b>           | 78.13              | 96.88         | <b>75</b>           | 703.13             | -178.13       |
| <b>26</b>           | 84.50              | 97.50         | <b>76</b>           | 722.00             | -190.00       |
| <b>27</b>           | 91.13              | 97.88         | <b>77</b>           | 741.13             | -202.13       |
| <b>28</b>           | 98.00              | 98.00         | <b>78</b>           | 760.50             | -214.50       |
| <b>29</b>           | 105.13             | 97.88         | <b>79</b>           | 780.13             | -227.13       |
| <b>30</b>           | 112.50             | 97.50         | <b>80</b>           | 800.00             | -240.00       |
| <b>31</b>           | 120.13             | 96.88         | <b>81</b>           | 820.13             | -253.13       |
| <b>32</b>           | 128.00             | 96.00         | <b>82</b>           | 840.50             | -266.50       |
| <b>33</b>           | 136.13             | 94.88         | <b>83</b>           | 861.13             | -280.13       |
| <b>34</b>           | 144.50             | 93.50         | <b>84</b>           | 882.00             | -294.00       |
| <b>35</b>           | 153.13             | 91.88         | <b>85</b>           | 903.13             | -308.13       |
| <b>36</b>           | 162.00             | 90.00         | <b>86</b>           | 924.50             | -322.50       |
| <b>37</b>           | 171.13             | 87.88         | <b>87</b>           | 946.13             | -337.13       |
| <b>38</b>           | 180.50             | 85.50         | <b>88</b>           | 968.00             | -352.00       |
| <b>39</b>           | 190.13             | 82.88         | <b>89</b>           | 990.13             | -367.13       |
| <b>40</b>           | 200.00             | 80.00         | <b>90</b>           | 1012.50            | -382.50       |
| <b>41</b>           | 210.13             | 76.88         | <b>91</b>           | 1035.13            | -398.13       |
| <b>42</b>           | 220.50             | 73.50         | <b>92</b>           | 1058.00            | -414.00       |
| <b>43</b>           | 231.13             | 69.88         | <b>93</b>           | 1081.13            | -430.13       |
| <b>44</b>           | 242.00             | 66.00         | <b>94</b>           | 1104.50            | -446.50       |
| <b>45</b>           | 253.13             | 61.88         | <b>95</b>           | 1128.13            | -463.13       |
| <b>46</b>           | 264.50             | 57.50         | <b>96</b>           | 1152.00            | -480.00       |
| <b>47</b>           | 276.13             | 52.88         | <b>97</b>           | 1176.13            | -497.13       |
| <b>48</b>           | 288.00             | 48.00         | <b>98</b>           | 1200.50            | -514.50       |
| <b>49</b>           | 300.13             | 42.88         | <b>99</b>           | 1225.13            | -532.13       |
| <b>50</b>           | 312.50             | 37.50         | <b>100</b>          | 1250.00            | -550.00       |

## Data for VOLUNTARY ASYM

| Player | Group | Period | Session | Choice team | Other choice team | Teaming mode | Effort | Other effort | Avg. effort team | Remuneration | Cost  | Profit | Cum. profit | Low cost |
|--------|-------|--------|---------|-------------|-------------------|--------------|--------|--------------|------------------|--------------|-------|--------|-------------|----------|
| 1      | 1     | 1      | 1       | 0           | 1                 | 0            | 7      | 1            | 0.0              | 49.0         | 4.9   | 44.1   | 44.1        | 1        |
| 1      | 1     | 2      | 1       | 1           | 1                 | 1            | 10     | 1            | 5.5              | 44.0         | 10.0  | 34.0   | 78.1        | 1        |
| 1      | 1     | 3      | 1       | 0           | 1                 | 0            | 25     | 1            | 0.0              | 175.0        | 62.5  | 112.5  | 190.6       | 1        |
| 1      | 1     | 4      | 1       | 0           | 1                 | 0            | 27     | 1            | 0.0              | 189.0        | 72.9  | 116.1  | 306.7       | 1        |
| 1      | 1     | 5      | 1       | 1           | 1                 | 1            | 16     | 1            | 8.5              | 68.0         | 25.6  | 42.4   | 349.1       | 1        |
| 1      | 1     | 6      | 1       | 0           | 1                 | 0            | 8      | 1            | 0.0              | 56.0         | 6.4   | 49.6   | 398.7       | 1        |
| 1      | 1     | 7      | 1       | 0           | 1                 | 0            | 32     | 28           | 0.0              | 224.0        | 102.4 | 121.6  | 520.3       | 1        |
| 1      | 1     | 8      | 1       | 1           | 1                 | 1            | 32     | 28           | 30.0             | 240.0        | 102.4 | 137.6  | 657.9       | 1        |
| 1      | 1     | 9      | 1       | 1           | 1                 | 1            | 30     | 28           | 29.0             | 232.0        | 90.0  | 142.0  | 799.9       | 1        |
| 1      | 1     | 10     | 1       | 0           | 1                 | 0            | 35     | 28           | 0.0              | 245.0        | 122.5 | 122.5  | 922.4       | 1        |
| 1      | 1     | 11     | 1       | 1           | 1                 | 1            | 69     | 28           | 48.5             | 388.0        | 476.1 | -88.1  | 834.3       | 1        |
| 1      | 1     | 12     | 1       | 0           | 1                 | 0            | 35     | 28           | 0.0              | 245.0        | 122.5 | 122.5  | 956.8       | 1        |
| 1      | 1     | 13     | 1       | 0           | 1                 | 0            | 37     | 28           | 0.0              | 259.0        | 136.9 | 122.1  | 1078.9      | 1        |
| 1      | 1     | 14     | 1       | 1           | 1                 | 1            | 57     | 28           | 42.5             | 340.0        | 324.9 | 15.1   | 1094.0      | 1        |
| 1      | 1     | 15     | 1       | 0           | 1                 | 0            | 40     | 25           | 0.0              | 280.0        | 160.0 | 120.0  | 1214.0      | 1        |
| 1      | 1     | 16     | 1       | 1           | 0                 | 0            | 10     | 28           | 0.0              | 70.0         | 10.0  | 60.0   | 1274.0      | 1        |
| 1      | 1     | 17     | 1       | 1           | 1                 | 1            | 45     | 0            | 22.5             | 180.0        | 202.5 | -22.5  | 1251.5      | 1        |
| 1      | 1     | 18     | 1       | 1           | 1                 | 1            | 37     | 0            | 18.5             | 148.0        | 136.9 | 11.1   | 1262.6      | 1        |
| 1      | 1     | 19     | 1       | 0           | 1                 | 0            | 27     | 28           | 0.0              | 189.0        | 72.9  | 116.1  | 1378.7      | 1        |
| 1      | 1     | 20     | 1       | 1           | 1                 | 1            | 1      | 28           | 14.5             | 116.0        | 0.1   | 115.9  | 1494.6      | 1        |
| 1      | 1     | 21     | 1       | 1           | 1                 | 1            | 26     | 0            | 13.0             | 104.0        | 67.6  | 36.4   | 1531.0      | 1        |
| 1      | 1     | 22     | 1       | 1           | 1                 | 1            | 0      | 0            | 0.0              | 0.0          | 0.0   | 0.0    | 1531.0      | 1        |
| 1      | 1     | 23     | 1       | 1           | 0                 | 0            | 1      | 28           | 0.0              | 7.0          | 0.1   | 6.9    | 1537.9      | 1        |
| 1      | 1     | 24     | 1       | 0           | 0                 | 0            | 27     | 28           | 0.0              | 189.0        | 72.9  | 116.1  | 1654.0      | 1        |
| 1      | 1     | 25     | 1       | 0           | 1                 | 0            | 39     | 28           | 0.0              | 273.0        | 152.1 | 120.9  | 1774.9      | 1        |
| 1      | 1     | 26     | 1       | 0           | 1                 | 0            | 17     | 0            | 0.0              | 119.0        | 28.9  | 90.1   | 1865.0      | 1        |
| 1      | 1     | 27     | 1       | 1           | 1                 | 1            | 13     | 0            | 6.5              | 52.0         | 16.9  | 35.1   | 1900.1      | 1        |
| 1      | 1     | 28     | 1       | 0           | 0                 | 0            | 19     | 28           | 0.0              | 133.0        | 36.1  | 96.9   | 1997.0      | 1        |
| 1      | 1     | 29     | 1       | 1           | 0                 | 0            | 15     | 28           | 0.0              | 105.0        | 22.5  | 82.5   | 2079.5      | 1        |
| 1      | 1     | 30     | 1       | 1           | 0                 | 0            | 29     | 28           | 0.0              | 203.0        | 84.1  | 118.9  | 2198.4      | 1        |
| 6      | 1     | 1      | 1       | 1           | 0                 | 0            | 1      | 7            | 0.0              | 7.0          | 0.1   | 6.9    | 6.9         | 0        |
| 6      | 1     | 2      | 1       | 1           | 1                 | 1            | 1      | 10           | 5.5              | 44.0         | 0.1   | 43.9   | 50.8        | 0        |
| 6      | 1     | 3      | 1       | 1           | 0                 | 0            | 1      | 25           | 0.0              | 7.0          | 0.1   | 6.9    | 57.6        | 0        |
| 6      | 1     | 4      | 1       | 1           | 0                 | 0            | 1      | 27           | 0.0              | 7.0          | 0.1   | 6.9    | 64.5        | 0        |

|   |   |    |   |   |   |   |    |    |      |       |      |       |        |   |
|---|---|----|---|---|---|---|----|----|------|-------|------|-------|--------|---|
| 6 | 1 | 5  | 1 | 1 | 1 | 1 | 1  | 16 | 8.5  | 68.0  | 0.1  | 67.9  | 132.4  | 0 |
| 6 | 1 | 6  | 1 | 1 | 0 | 0 | 1  | 8  | 0.0  | 7.0   | 0.1  | 6.9   | 139.3  | 0 |
| 6 | 1 | 7  | 1 | 1 | 0 | 0 | 28 | 32 | 0.0  | 196.0 | 98.0 | 98.0  | 237.3  | 0 |
| 6 | 1 | 8  | 1 | 1 | 1 | 1 | 28 | 32 | 30.0 | 240.0 | 98.0 | 142.0 | 379.3  | 0 |
| 6 | 1 | 9  | 1 | 1 | 1 | 1 | 28 | 30 | 29.0 | 232.0 | 98.0 | 134.0 | 513.3  | 0 |
| 6 | 1 | 10 | 1 | 1 | 0 | 0 | 28 | 35 | 0.0  | 196.0 | 98.0 | 98.0  | 611.3  | 0 |
| 6 | 1 | 11 | 1 | 1 | 1 | 1 | 28 | 69 | 48.5 | 388.0 | 98.0 | 290.0 | 901.3  | 0 |
| 6 | 1 | 12 | 1 | 1 | 0 | 0 | 28 | 35 | 0.0  | 196.0 | 98.0 | 98.0  | 999.3  | 0 |
| 6 | 1 | 13 | 1 | 1 | 0 | 0 | 28 | 37 | 0.0  | 196.0 | 98.0 | 98.0  | 1097.3 | 0 |
| 6 | 1 | 14 | 1 | 1 | 1 | 1 | 28 | 57 | 42.5 | 340.0 | 98.0 | 242.0 | 1339.3 | 0 |
| 6 | 1 | 15 | 1 | 1 | 0 | 0 | 25 | 40 | 0.0  | 175.0 | 78.1 | 96.9  | 1436.1 | 0 |
| 6 | 1 | 16 | 1 | 0 | 1 | 0 | 28 | 10 | 0.0  | 196.0 | 98.0 | 98.0  | 1534.1 | 0 |
| 6 | 1 | 17 | 1 | 1 | 1 | 1 | 0  | 45 | 22.5 | 180.0 | 0.0  | 180.0 | 1714.1 | 0 |
| 6 | 1 | 18 | 1 | 1 | 1 | 1 | 0  | 37 | 18.5 | 148.0 | 0.0  | 148.0 | 1862.1 | 0 |
| 6 | 1 | 19 | 1 | 1 | 0 | 0 | 28 | 27 | 0.0  | 196.0 | 98.0 | 98.0  | 1960.1 | 0 |
| 6 | 1 | 20 | 1 | 1 | 1 | 1 | 28 | 1  | 14.5 | 116.0 | 98.0 | 18.0  | 1978.1 | 0 |
| 6 | 1 | 21 | 1 | 1 | 1 | 1 | 0  | 26 | 13.0 | 104.0 | 0.0  | 104.0 | 2082.1 | 0 |
| 6 | 1 | 22 | 1 | 1 | 1 | 1 | 0  | 0  | 0.0  | 0.0   | 0.0  | 0.0   | 2082.1 | 0 |
| 6 | 1 | 23 | 1 | 0 | 1 | 0 | 28 | 1  | 0.0  | 196.0 | 98.0 | 98.0  | 2180.1 | 0 |
| 6 | 1 | 24 | 1 | 0 | 0 | 0 | 28 | 27 | 0.0  | 196.0 | 98.0 | 98.0  | 2278.1 | 0 |
| 6 | 1 | 25 | 1 | 1 | 0 | 0 | 28 | 39 | 0.0  | 196.0 | 98.0 | 98.0  | 2376.1 | 0 |
| 6 | 1 | 26 | 1 | 1 | 0 | 0 | 0  | 17 | 0.0  | 0.0   | 0.0  | 0.0   | 2376.1 | 0 |
| 6 | 1 | 27 | 1 | 1 | 1 | 1 | 0  | 13 | 6.5  | 52.0  | 0.0  | 52.0  | 2428.1 | 0 |
| 6 | 1 | 28 | 1 | 0 | 0 | 0 | 28 | 19 | 0.0  | 196.0 | 98.0 | 98.0  | 2526.1 | 0 |
| 6 | 1 | 29 | 1 | 0 | 1 | 0 | 28 | 15 | 0.0  | 196.0 | 98.0 | 98.0  | 2624.1 | 0 |
| 6 | 1 | 30 | 1 | 0 | 1 | 0 | 28 | 29 | 0.0  | 196.0 | 98.0 | 98.0  | 2722.1 | 0 |
| 2 | 2 | 1  | 1 | 1 | 1 | 1 | 28 | 15 | 21.5 | 172.0 | 98.0 | 74.0  | 74.0   | 0 |
| 2 | 2 | 2  | 1 | 0 | 0 | 0 | 28 | 27 | 0.0  | 196.0 | 98.0 | 98.0  | 172.0  | 0 |
| 2 | 2 | 3  | 1 | 0 | 1 | 0 | 28 | 12 | 0.0  | 196.0 | 98.0 | 98.0  | 270.0  | 0 |
| 2 | 2 | 4  | 1 | 1 | 1 | 1 | 10 | 30 | 20.0 | 160.0 | 12.5 | 147.5 | 417.5  | 0 |
| 2 | 2 | 5  | 1 | 1 | 1 | 1 | 10 | 15 | 12.5 | 100.0 | 12.5 | 87.5  | 505.0  | 0 |
| 2 | 2 | 6  | 1 | 0 | 1 | 0 | 28 | 50 | 0.0  | 196.0 | 98.0 | 98.0  | 603.0  | 0 |
| 2 | 2 | 7  | 1 | 1 | 0 | 0 | 28 | 45 | 0.0  | 196.0 | 98.0 | 98.0  | 701.0  | 0 |
| 2 | 2 | 8  | 1 | 1 | 0 | 0 | 28 | 35 | 0.0  | 196.0 | 98.0 | 98.0  | 799.0  | 0 |
| 2 | 2 | 9  | 1 | 1 | 1 | 1 | 20 | 62 | 41.0 | 328.0 | 50.0 | 278.0 | 1077.0 | 0 |
| 2 | 2 | 10 | 1 | 1 | 1 | 1 | 20 | 4  | 12.0 | 96.0  | 50.0 | 46.0  | 1123.0 | 0 |
| 2 | 2 | 11 | 1 | 0 | 1 | 0 | 28 | 24 | 0.0  | 196.0 | 98.0 | 98.0  | 1221.0 | 0 |
| 2 | 2 | 12 | 1 | 0 | 0 | 0 | 28 | 20 | 0.0  | 196.0 | 98.0 | 98.0  | 1319.0 | 0 |



|   |   |    |   |   |   |   |    |    |      |       |       |       |        |   |
|---|---|----|---|---|---|---|----|----|------|-------|-------|-------|--------|---|
| 2 | 2 | 13 | 1 | 0 | 1 | 0 | 28 | 29 | 0.0  | 196.0 | 98.0  | 98.0  | 1417.0 | 0 |
| 2 | 2 | 14 | 1 | 1 | 0 | 0 | 28 | 28 | 0.0  | 196.0 | 98.0  | 98.0  | 1515.0 | 0 |
| 2 | 2 | 15 | 1 | 1 | 0 | 0 | 28 | 30 | 0.0  | 196.0 | 98.0  | 98.0  | 1613.0 | 0 |
| 2 | 2 | 16 | 1 | 1 | 1 | 1 | 20 | 30 | 25.0 | 200.0 | 50.0  | 150.0 | 1763.0 | 0 |
| 2 | 2 | 17 | 1 | 1 | 1 | 1 | 25 | 35 | 30.0 | 240.0 | 78.1  | 161.9 | 1924.9 | 0 |
| 2 | 2 | 18 | 1 | 1 | 1 | 1 | 28 | 37 | 32.5 | 260.0 | 98.0  | 162.0 | 2086.9 | 0 |
| 2 | 2 | 19 | 1 | 1 | 1 | 1 | 28 | 39 | 33.5 | 268.0 | 98.0  | 170.0 | 2256.9 | 0 |
| 2 | 2 | 20 | 1 | 1 | 1 | 1 | 30 | 37 | 33.5 | 268.0 | 112.5 | 155.5 | 2412.4 | 0 |
| 2 | 2 | 21 | 1 | 1 | 1 | 1 | 28 | 37 | 32.5 | 260.0 | 98.0  | 162.0 | 2574.4 | 0 |
| 2 | 2 | 22 | 1 | 1 | 1 | 1 | 37 | 38 | 37.5 | 300.0 | 171.1 | 128.9 | 2703.3 | 0 |
| 2 | 2 | 23 | 1 | 1 | 1 | 1 | 0  | 39 | 19.5 | 156.0 | 0.0   | 156.0 | 2859.3 | 0 |
| 2 | 2 | 24 | 1 | 1 | 0 | 0 | 28 | 40 | 0.0  | 196.0 | 98.0  | 98.0  | 2957.3 | 0 |
| 2 | 2 | 25 | 1 | 1 | 1 | 1 | 20 | 35 | 27.5 | 220.0 | 50.0  | 170.0 | 3127.3 | 0 |
| 2 | 2 | 26 | 1 | 1 | 1 | 1 | 25 | 37 | 31.0 | 248.0 | 78.1  | 169.9 | 3297.1 | 0 |
| 2 | 2 | 27 | 1 | 1 | 1 | 1 | 28 | 31 | 29.5 | 236.0 | 98.0  | 138.0 | 3435.1 | 0 |
| 2 | 2 | 28 | 1 | 0 | 1 | 0 | 28 | 33 | 0.0  | 196.0 | 98.0  | 98.0  | 3533.1 | 0 |
| 2 | 2 | 29 | 1 | 1 | 1 | 1 | 25 | 33 | 29.0 | 232.0 | 78.1  | 153.9 | 3687.0 | 0 |
| 2 | 2 | 30 | 1 | 1 | 1 | 1 | 20 | 30 | 25.0 | 200.0 | 50.0  | 150.0 | 3837.0 | 0 |
| 5 | 2 | 1  | 1 | 1 | 1 | 1 | 15 | 28 | 21.5 | 172.0 | 22.5  | 149.5 | 149.5  | 1 |
| 5 | 2 | 2  | 1 | 0 | 0 | 0 | 27 | 28 | 0.0  | 189.0 | 72.9  | 116.1 | 265.6  | 1 |
| 5 | 2 | 3  | 1 | 1 | 0 | 0 | 12 | 28 | 0.0  | 84.0  | 14.4  | 69.6  | 335.2  | 1 |
| 5 | 2 | 4  | 1 | 1 | 1 | 1 | 30 | 10 | 20.0 | 160.0 | 90.0  | 70.0  | 405.2  | 1 |
| 5 | 2 | 5  | 1 | 1 | 1 | 1 | 15 | 10 | 12.5 | 100.0 | 22.5  | 77.5  | 482.7  | 1 |
| 5 | 2 | 6  | 1 | 1 | 0 | 0 | 50 | 28 | 0.0  | 350.0 | 250.0 | 100.0 | 582.7  | 1 |
| 5 | 2 | 7  | 1 | 0 | 1 | 0 | 45 | 28 | 0.0  | 315.0 | 202.5 | 112.5 | 695.2  | 1 |
| 5 | 2 | 8  | 1 | 0 | 1 | 0 | 35 | 28 | 0.0  | 245.0 | 122.5 | 122.5 | 817.7  | 1 |
| 5 | 2 | 9  | 1 | 1 | 1 | 1 | 62 | 20 | 41.0 | 328.0 | 384.4 | -56.4 | 761.3  | 1 |
| 5 | 2 | 10 | 1 | 1 | 1 | 1 | 4  | 20 | 12.0 | 96.0  | 1.6   | 94.4  | 855.7  | 1 |
| 5 | 2 | 11 | 1 | 1 | 0 | 0 | 24 | 28 | 0.0  | 168.0 | 57.6  | 110.4 | 966.1  | 1 |
| 5 | 2 | 12 | 1 | 0 | 0 | 0 | 20 | 28 | 0.0  | 140.0 | 40.0  | 100.0 | 1066.1 | 1 |
| 5 | 2 | 13 | 1 | 1 | 0 | 0 | 29 | 28 | 0.0  | 203.0 | 84.1  | 118.9 | 1185.0 | 1 |
| 5 | 2 | 14 | 1 | 0 | 1 | 0 | 28 | 28 | 0.0  | 196.0 | 78.4  | 117.6 | 1302.6 | 1 |
| 5 | 2 | 15 | 1 | 0 | 1 | 0 | 30 | 28 | 0.0  | 210.0 | 90.0  | 120.0 | 1422.6 | 1 |
| 5 | 2 | 16 | 1 | 1 | 1 | 1 | 30 | 20 | 25.0 | 200.0 | 90.0  | 110.0 | 1532.6 | 1 |
| 5 | 2 | 17 | 1 | 1 | 1 | 1 | 35 | 25 | 30.0 | 240.0 | 122.5 | 117.5 | 1650.1 | 1 |
| 5 | 2 | 18 | 1 | 1 | 1 | 1 | 37 | 28 | 32.5 | 260.0 | 136.9 | 123.1 | 1773.2 | 1 |
| 5 | 2 | 19 | 1 | 1 | 1 | 1 | 39 | 28 | 33.5 | 268.0 | 152.1 | 115.9 | 1889.1 | 1 |
| 5 | 2 | 20 | 1 | 1 | 1 | 1 | 37 | 30 | 33.5 | 268.0 | 136.9 | 131.1 | 2020.2 | 1 |

|   |   |    |   |   |   |   |    |    |      |       |       |        |        |   |
|---|---|----|---|---|---|---|----|----|------|-------|-------|--------|--------|---|
| 5 | 2 | 21 | 1 | 1 | 1 | 1 | 37 | 28 | 32.5 | 260.0 | 136.9 | 123.1  | 2143.3 | 1 |
| 5 | 2 | 22 | 1 | 1 | 1 | 1 | 38 | 37 | 37.5 | 300.0 | 144.4 | 155.6  | 2298.9 | 1 |
| 5 | 2 | 23 | 1 | 1 | 1 | 1 | 39 | 0  | 19.5 | 156.0 | 152.1 | 3.9    | 2302.8 | 1 |
| 5 | 2 | 24 | 1 | 0 | 1 | 0 | 40 | 28 | 0.0  | 280.0 | 160.0 | 120.0  | 2422.8 | 1 |
| 5 | 2 | 25 | 1 | 1 | 1 | 1 | 35 | 20 | 27.5 | 220.0 | 122.5 | 97.5   | 2520.3 | 1 |
| 5 | 2 | 26 | 1 | 1 | 1 | 1 | 37 | 25 | 31.0 | 248.0 | 136.9 | 111.1  | 2631.4 | 1 |
| 5 | 2 | 27 | 1 | 1 | 1 | 1 | 31 | 28 | 29.5 | 236.0 | 96.1  | 139.9  | 2771.3 | 1 |
| 5 | 2 | 28 | 1 | 1 | 0 | 0 | 33 | 28 | 0.0  | 231.0 | 108.9 | 122.1  | 2893.4 | 1 |
| 5 | 2 | 29 | 1 | 1 | 1 | 1 | 33 | 25 | 29.0 | 232.0 | 108.9 | 123.1  | 3016.5 | 1 |
| 5 | 2 | 30 | 1 | 1 | 1 | 1 | 30 | 20 | 25.0 | 200.0 | 90.0  | 110.0  | 3126.5 | 1 |
| 3 | 3 | 1  | 1 | 0 | 1 | 0 | 50 | 34 | 0.0  | 350.0 | 250.0 | 100.0  | 100.0  | 1 |
| 3 | 3 | 2  | 1 | 0 | 0 | 0 | 99 | 29 | 0.0  | 693.0 | 980.1 | -287.1 | -187.1 | 1 |
| 3 | 3 | 3  | 1 | 0 | 1 | 0 | 75 | 20 | 0.0  | 525.0 | 562.5 | -37.5  | -224.6 | 1 |
| 3 | 3 | 4  | 1 | 1 | 1 | 1 | 20 | 64 | 42.0 | 336.0 | 40.0  | 296.0  | 71.4   | 1 |
| 3 | 3 | 5  | 1 | 1 | 1 | 1 | 25 | 20 | 22.5 | 180.0 | 62.5  | 117.5  | 188.9  | 1 |
| 3 | 3 | 6  | 1 | 1 | 1 | 1 | 19 | 25 | 22.0 | 176.0 | 36.1  | 139.9  | 328.8  | 1 |
| 3 | 3 | 7  | 1 | 0 | 1 | 0 | 70 | 40 | 0.0  | 490.0 | 490.0 | 0.0    | 328.8  | 1 |
| 3 | 3 | 8  | 1 | 1 | 0 | 0 | 20 | 16 | 0.0  | 140.0 | 40.0  | 100.0  | 428.8  | 1 |
| 3 | 3 | 9  | 1 | 1 | 0 | 0 | 10 | 36 | 0.0  | 70.0  | 10.0  | 60.0   | 488.8  | 1 |
| 3 | 3 | 10 | 1 | 1 | 1 | 1 | 21 | 40 | 30.5 | 244.0 | 44.1  | 199.9  | 688.7  | 1 |
| 3 | 3 | 11 | 1 | 1 | 1 | 1 | 15 | 50 | 32.5 | 260.0 | 22.5  | 237.5  | 926.2  | 1 |
| 3 | 3 | 12 | 1 | 0 | 1 | 0 | 20 | 52 | 0.0  | 140.0 | 40.0  | 100.0  | 1026.2 | 1 |
| 3 | 3 | 13 | 1 | 1 | 0 | 0 | 50 | 26 | 0.0  | 350.0 | 250.0 | 100.0  | 1126.2 | 1 |
| 3 | 3 | 14 | 1 | 1 | 0 | 0 | 40 | 28 | 0.0  | 280.0 | 160.0 | 120.0  | 1246.2 | 1 |
| 3 | 3 | 15 | 1 | 1 | 0 | 0 | 45 | 7  | 0.0  | 315.0 | 202.5 | 112.5  | 1358.7 | 1 |
| 3 | 3 | 16 | 1 | 1 | 0 | 0 | 50 | 12 | 0.0  | 350.0 | 250.0 | 100.0  | 1458.7 | 1 |
| 3 | 3 | 17 | 1 | 1 | 0 | 0 | 25 | 14 | 0.0  | 175.0 | 62.5  | 112.5  | 1571.2 | 1 |
| 3 | 3 | 18 | 1 | 1 | 0 | 0 | 10 | 20 | 0.0  | 70.0  | 10.0  | 60.0   | 1631.2 | 1 |
| 3 | 3 | 19 | 1 | 1 | 0 | 0 | 10 | 21 | 0.0  | 70.0  | 10.0  | 60.0   | 1691.2 | 1 |
| 3 | 3 | 20 | 1 | 0 | 0 | 0 | 50 | 20 | 0.0  | 350.0 | 250.0 | 100.0  | 1791.2 | 1 |
| 3 | 3 | 21 | 1 | 1 | 0 | 0 | 1  | 21 | 0.0  | 7.0   | 0.1   | 6.9    | 1798.1 | 1 |
| 3 | 3 | 22 | 1 | 1 | 0 | 0 | 20 | 28 | 0.0  | 140.0 | 40.0  | 100.0  | 1898.1 | 1 |
| 3 | 3 | 23 | 1 | 1 | 0 | 0 | 25 | 28 | 0.0  | 175.0 | 62.5  | 112.5  | 2010.6 | 1 |
| 3 | 3 | 24 | 1 | 1 | 0 | 0 | 45 | 28 | 0.0  | 315.0 | 202.5 | 112.5  | 2123.1 | 1 |
| 3 | 3 | 25 | 1 | 1 | 0 | 0 | 44 | 28 | 0.0  | 308.0 | 193.6 | 114.4  | 2237.5 | 1 |
| 3 | 3 | 26 | 1 | 0 | 1 | 0 | 25 | 30 | 0.0  | 175.0 | 62.5  | 112.5  | 2350.0 | 1 |
| 3 | 3 | 27 | 1 | 1 | 1 | 1 | 15 | 40 | 27.5 | 220.0 | 22.5  | 197.5  | 2547.5 | 1 |
| 3 | 3 | 28 | 1 | 1 | 0 | 0 | 20 | 28 | 0.0  | 140.0 | 40.0  | 100.0  | 2647.5 | 1 |

|   |   |    |   |   |   |   |     |    |      |       |        |        |        |   |
|---|---|----|---|---|---|---|-----|----|------|-------|--------|--------|--------|---|
| 3 | 3 | 29 | 1 | 1 | 1 | 1 | 47  | 12 | 29.5 | 236.0 | 220.9  | 15.1   | 2662.6 | 1 |
| 3 | 3 | 30 | 1 | 1 | 1 | 1 | 35  | 10 | 22.5 | 180.0 | 122.5  | 57.5   | 2720.1 | 1 |
| 4 | 3 | 1  | 1 | 1 | 0 | 0 | 34  | 50 | 0.0  | 238.0 | 144.5  | 93.5   | 93.5   | 0 |
| 4 | 3 | 2  | 1 | 0 | 0 | 0 | 29  | 99 | 0.0  | 203.0 | 105.1  | 97.9   | 191.4  | 0 |
| 4 | 3 | 3  | 1 | 1 | 0 | 0 | 20  | 75 | 0.0  | 140.0 | 50.0   | 90.0   | 281.4  | 0 |
| 4 | 3 | 4  | 1 | 1 | 1 | 1 | 64  | 20 | 42.0 | 336.0 | 512.0  | -176.0 | 105.4  | 0 |
| 4 | 3 | 5  | 1 | 1 | 1 | 1 | 20  | 25 | 22.5 | 180.0 | 50.0   | 130.0  | 235.4  | 0 |
| 4 | 3 | 6  | 1 | 1 | 1 | 1 | 25  | 19 | 22.0 | 176.0 | 78.1   | 97.9   | 333.3  | 0 |
| 4 | 3 | 7  | 1 | 1 | 0 | 0 | 40  | 70 | 0.0  | 280.0 | 200.0  | 80.0   | 413.3  | 0 |
| 4 | 3 | 8  | 1 | 0 | 1 | 0 | 16  | 20 | 0.0  | 112.0 | 32.0   | 80.0   | 493.3  | 0 |
| 4 | 3 | 9  | 1 | 0 | 1 | 0 | 36  | 10 | 0.0  | 252.0 | 162.0  | 90.0   | 583.3  | 0 |
| 4 | 3 | 10 | 1 | 1 | 1 | 1 | 40  | 21 | 30.5 | 244.0 | 200.0  | 44.0   | 627.3  | 0 |
| 4 | 3 | 11 | 1 | 1 | 1 | 1 | 50  | 15 | 32.5 | 260.0 | 312.5  | -52.5  | 574.8  | 0 |
| 4 | 3 | 12 | 1 | 1 | 0 | 0 | 52  | 20 | 0.0  | 364.0 | 338.0  | 26.0   | 600.8  | 0 |
| 4 | 3 | 13 | 1 | 0 | 1 | 0 | 26  | 50 | 0.0  | 182.0 | 84.5   | 97.5   | 698.3  | 0 |
| 4 | 3 | 14 | 1 | 0 | 1 | 0 | 28  | 40 | 0.0  | 196.0 | 98.0   | 98.0   | 796.3  | 0 |
| 4 | 3 | 15 | 1 | 0 | 1 | 0 | 7   | 45 | 0.0  | 49.0  | 6.1    | 42.9   | 839.1  | 0 |
| 4 | 3 | 16 | 1 | 0 | 1 | 0 | 12  | 50 | 0.0  | 84.0  | 18.0   | 66.0   | 905.1  | 0 |
| 4 | 3 | 17 | 1 | 0 | 1 | 0 | 14  | 25 | 0.0  | 98.0  | 24.5   | 73.5   | 978.6  | 0 |
| 4 | 3 | 18 | 1 | 0 | 1 | 0 | 20  | 10 | 0.0  | 140.0 | 50.0   | 90.0   | 1068.6 | 0 |
| 4 | 3 | 19 | 1 | 0 | 1 | 0 | 21  | 10 | 0.0  | 147.0 | 55.1   | 91.9   | 1160.5 | 0 |
| 4 | 3 | 20 | 1 | 0 | 0 | 0 | 20  | 50 | 0.0  | 140.0 | 50.0   | 90.0   | 1250.5 | 0 |
| 4 | 3 | 21 | 1 | 0 | 1 | 0 | 21  | 1  | 0.0  | 147.0 | 55.1   | 91.9   | 1342.4 | 0 |
| 4 | 3 | 22 | 1 | 0 | 1 | 0 | 28  | 20 | 0.0  | 196.0 | 98.0   | 98.0   | 1440.4 | 0 |
| 4 | 3 | 23 | 1 | 0 | 1 | 0 | 28  | 25 | 0.0  | 196.0 | 98.0   | 98.0   | 1538.4 | 0 |
| 4 | 3 | 24 | 1 | 0 | 1 | 0 | 28  | 45 | 0.0  | 196.0 | 98.0   | 98.0   | 1636.4 | 0 |
| 4 | 3 | 25 | 1 | 0 | 1 | 0 | 28  | 44 | 0.0  | 196.0 | 98.0   | 98.0   | 1734.4 | 0 |
| 4 | 3 | 26 | 1 | 1 | 0 | 0 | 30  | 25 | 0.0  | 210.0 | 112.5  | 97.5   | 1831.9 | 0 |
| 4 | 3 | 27 | 1 | 1 | 1 | 1 | 40  | 15 | 27.5 | 220.0 | 200.0  | 20.0   | 1851.9 | 0 |
| 4 | 3 | 28 | 1 | 0 | 1 | 0 | 28  | 20 | 0.0  | 196.0 | 98.0   | 98.0   | 1949.9 | 0 |
| 4 | 3 | 29 | 1 | 1 | 1 | 1 | 12  | 47 | 29.5 | 236.0 | 18.0   | 218.0  | 2167.9 | 0 |
| 4 | 3 | 30 | 1 | 1 | 1 | 1 | 10  | 35 | 22.5 | 180.0 | 12.5   | 167.5  | 2335.4 | 0 |
| 7 | 4 | 1  | 1 | 1 | 0 | 0 | 40  | 28 | 0.0  | 280.0 | 160.0  | 120.0  | 120.0  | 1 |
| 7 | 4 | 2  | 1 | 1 | 0 | 0 | 32  | 30 | 0.0  | 224.0 | 102.4  | 121.6  | 241.6  | 1 |
| 7 | 4 | 3  | 1 | 0 | 1 | 0 | 37  | 50 | 0.0  | 259.0 | 136.9  | 122.1  | 363.7  | 1 |
| 7 | 4 | 4  | 1 | 1 | 1 | 1 | 100 | 6  | 53.0 | 424.0 | 1000.0 | -576.0 | -212.3 | 1 |
| 7 | 4 | 5  | 1 | 1 | 1 | 1 | 90  | 39 | 64.5 | 516.0 | 810.0  | -294.0 | -506.3 | 1 |
| 7 | 4 | 6  | 1 | 1 | 1 | 1 | 50  | 1  | 25.5 | 204.0 | 250.0  | -46.0  | -552.3 | 1 |

|    |   |    |   |   |   |   |     |     |      |       |        |        |         |   |
|----|---|----|---|---|---|---|-----|-----|------|-------|--------|--------|---------|---|
| 7  | 4 | 7  | 1 | 1 | 1 | 1 | 100 | 25  | 62.5 | 500.0 | 1000.0 | -500.0 | -1052.3 | 1 |
| 7  | 4 | 8  | 1 | 1 | 1 | 1 | 100 | 40  | 70.0 | 560.0 | 1000.0 | -440.0 | -1492.3 | 1 |
| 7  | 4 | 9  | 1 | 1 | 1 | 1 | 40  | 25  | 32.5 | 260.0 | 160.0  | 100.0  | -1392.3 | 1 |
| 7  | 4 | 10 | 1 | 0 | 1 | 0 | 33  | 58  | 0.0  | 231.0 | 108.9  | 122.1  | -1270.2 | 1 |
| 7  | 4 | 11 | 1 | 1 | 1 | 1 | 35  | 50  | 42.5 | 340.0 | 122.5  | 217.5  | -1052.7 | 1 |
| 7  | 4 | 12 | 1 | 1 | 1 | 1 | 50  | 20  | 35.0 | 280.0 | 250.0  | 30.0   | -1022.7 | 1 |
| 7  | 4 | 13 | 1 | 1 | 0 | 0 | 80  | 100 | 0.0  | 560.0 | 640.0  | -80.0  | -1102.7 | 1 |
| 7  | 4 | 14 | 1 | 1 | 1 | 1 | 50  | 100 | 75.0 | 600.0 | 250.0  | 350.0  | -752.7  | 1 |
| 7  | 4 | 15 | 1 | 1 | 1 | 1 | 100 | 50  | 75.0 | 600.0 | 1000.0 | -400.0 | -1152.7 | 1 |
| 7  | 4 | 16 | 1 | 1 | 1 | 1 | 75  | 20  | 47.5 | 380.0 | 562.5  | -182.5 | -1335.2 | 1 |
| 7  | 4 | 17 | 1 | 0 | 0 | 0 | 37  | 28  | 0.0  | 259.0 | 136.9  | 122.1  | -1213.1 | 1 |
| 7  | 4 | 18 | 1 | 0 | 0 | 0 | 35  | 28  | 0.0  | 245.0 | 122.5  | 122.5  | -1090.6 | 1 |
| 7  | 4 | 19 | 1 | 0 | 0 | 0 | 35  | 28  | 0.0  | 245.0 | 122.5  | 122.5  | -968.1  | 1 |
| 7  | 4 | 20 | 1 | 0 | 0 | 0 | 35  | 28  | 0.0  | 245.0 | 122.5  | 122.5  | -845.6  | 1 |
| 7  | 4 | 21 | 1 | 0 | 0 | 0 | 45  | 27  | 0.0  | 315.0 | 202.5  | 112.5  | -733.1  | 1 |
| 7  | 4 | 22 | 1 | 0 | 0 | 0 | 48  | 1   | 0.0  | 336.0 | 230.4  | 105.6  | -627.5  | 1 |
| 7  | 4 | 23 | 1 | 1 | 0 | 0 | 32  | 28  | 0.0  | 224.0 | 102.4  | 121.6  | -505.9  | 1 |
| 7  | 4 | 24 | 1 | 1 | 0 | 0 | 35  | 28  | 0.0  | 245.0 | 122.5  | 122.5  | -383.4  | 1 |
| 7  | 4 | 25 | 1 | 1 | 0 | 0 | 37  | 28  | 0.0  | 259.0 | 136.9  | 122.1  | -261.3  | 1 |
| 7  | 4 | 26 | 1 | 1 | 0 | 0 | 37  | 28  | 0.0  | 259.0 | 136.9  | 122.1  | -139.2  | 1 |
| 7  | 4 | 27 | 1 | 1 | 0 | 0 | 35  | 28  | 0.0  | 245.0 | 122.5  | 122.5  | -16.7   | 1 |
| 7  | 4 | 28 | 1 | 1 | 0 | 0 | 37  | 28  | 0.0  | 259.0 | 136.9  | 122.1  | 105.4   | 1 |
| 7  | 4 | 29 | 1 | 1 | 0 | 0 | 37  | 28  | 0.0  | 259.0 | 136.9  | 122.1  | 227.5   | 1 |
| 7  | 4 | 30 | 1 | 0 | 0 | 0 | 37  | 28  | 0.0  | 259.0 | 136.9  | 122.1  | 349.6   | 1 |
| 12 | 4 | 1  | 1 | 0 | 1 | 0 | 28  | 40  | 0.0  | 196.0 | 98.0   | 98.0   | 98.0    | 0 |
| 12 | 4 | 2  | 1 | 0 | 1 | 0 | 30  | 32  | 0.0  | 210.0 | 112.5  | 97.5   | 195.5   | 0 |
| 12 | 4 | 3  | 1 | 1 | 0 | 0 | 50  | 37  | 0.0  | 350.0 | 312.5  | 37.5   | 233.0   | 0 |
| 12 | 4 | 4  | 1 | 1 | 1 | 1 | 6   | 100 | 53.0 | 424.0 | 4.5    | 419.5  | 652.5   | 0 |
| 12 | 4 | 5  | 1 | 1 | 1 | 1 | 39  | 90  | 64.5 | 516.0 | 190.1  | 325.9  | 978.4   | 0 |
| 12 | 4 | 6  | 1 | 1 | 1 | 1 | 1   | 50  | 25.5 | 204.0 | 0.1    | 203.9  | 1182.3  | 0 |
| 12 | 4 | 7  | 1 | 1 | 1 | 1 | 25  | 100 | 62.5 | 500.0 | 78.1   | 421.9  | 1604.1  | 0 |
| 12 | 4 | 8  | 1 | 1 | 1 | 1 | 40  | 100 | 70.0 | 560.0 | 200.0  | 360.0  | 1964.1  | 0 |
| 12 | 4 | 9  | 1 | 1 | 1 | 1 | 25  | 40  | 32.5 | 260.0 | 78.1   | 181.9  | 2146.0  | 0 |
| 12 | 4 | 10 | 1 | 1 | 0 | 0 | 58  | 33  | 0.0  | 406.0 | 420.5  | -14.5  | 2131.5  | 0 |
| 12 | 4 | 11 | 1 | 1 | 1 | 1 | 50  | 35  | 42.5 | 340.0 | 312.5  | 27.5   | 2159.0  | 0 |
| 12 | 4 | 12 | 1 | 1 | 1 | 1 | 20  | 50  | 35.0 | 280.0 | 50.0   | 230.0  | 2389.0  | 0 |
| 12 | 4 | 13 | 1 | 0 | 1 | 0 | 100 | 80  | 0.0  | 700.0 | 1250.0 | -550.0 | 1839.0  | 0 |
| 12 | 4 | 14 | 1 | 1 | 1 | 1 | 100 | 50  | 75.0 | 600.0 | 1250.0 | -650.0 | 1189.0  | 0 |

|    |   |    |   |   |   |   |     |     |      |       |        |        |        |   |
|----|---|----|---|---|---|---|-----|-----|------|-------|--------|--------|--------|---|
| 12 | 4 | 15 | 1 | 1 | 1 | 1 | 50  | 100 | 75.0 | 600.0 | 312.5  | 287.5  | 1476.5 | 0 |
| 12 | 4 | 16 | 1 | 1 | 1 | 1 | 20  | 75  | 47.5 | 380.0 | 50.0   | 330.0  | 1806.5 | 0 |
| 12 | 4 | 17 | 1 | 0 | 0 | 0 | 28  | 37  | 0.0  | 196.0 | 98.0   | 98.0   | 1904.5 | 0 |
| 12 | 4 | 18 | 1 | 0 | 0 | 0 | 28  | 35  | 0.0  | 196.0 | 98.0   | 98.0   | 2002.5 | 0 |
| 12 | 4 | 19 | 1 | 0 | 0 | 0 | 28  | 35  | 0.0  | 196.0 | 98.0   | 98.0   | 2100.5 | 0 |
| 12 | 4 | 20 | 1 | 0 | 0 | 0 | 28  | 35  | 0.0  | 196.0 | 98.0   | 98.0   | 2198.5 | 0 |
| 12 | 4 | 21 | 1 | 0 | 0 | 0 | 27  | 45  | 0.0  | 189.0 | 91.1   | 97.9   | 2296.4 | 0 |
| 12 | 4 | 22 | 1 | 0 | 0 | 0 | 1   | 48  | 0.0  | 7.0   | 0.1    | 6.9    | 2303.3 | 0 |
| 12 | 4 | 23 | 1 | 0 | 1 | 0 | 28  | 32  | 0.0  | 196.0 | 98.0   | 98.0   | 2401.3 | 0 |
| 12 | 4 | 24 | 1 | 0 | 1 | 0 | 28  | 35  | 0.0  | 196.0 | 98.0   | 98.0   | 2499.3 | 0 |
| 12 | 4 | 25 | 1 | 0 | 1 | 0 | 28  | 37  | 0.0  | 196.0 | 98.0   | 98.0   | 2597.3 | 0 |
| 12 | 4 | 26 | 1 | 0 | 1 | 0 | 28  | 37  | 0.0  | 196.0 | 98.0   | 98.0   | 2695.3 | 0 |
| 12 | 4 | 27 | 1 | 0 | 1 | 0 | 28  | 35  | 0.0  | 196.0 | 98.0   | 98.0   | 2793.3 | 0 |
| 12 | 4 | 28 | 1 | 0 | 1 | 0 | 28  | 37  | 0.0  | 196.0 | 98.0   | 98.0   | 2891.3 | 0 |
| 12 | 4 | 29 | 1 | 0 | 1 | 0 | 28  | 37  | 0.0  | 196.0 | 98.0   | 98.0   | 2989.3 | 0 |
| 12 | 4 | 30 | 1 | 0 | 0 | 0 | 28  | 37  | 0.0  | 196.0 | 98.0   | 98.0   | 3087.3 | 0 |
| 8  | 5 | 1  | 1 | 1 | 1 | 1 | 14  | 90  | 52.0 | 416.0 | 24.5   | 391.5  | 391.5  | 0 |
| 8  | 5 | 2  | 1 | 1 | 1 | 1 | 14  | 70  | 42.0 | 336.0 | 24.5   | 311.5  | 703.0  | 0 |
| 8  | 5 | 3  | 1 | 1 | 1 | 1 | 28  | 60  | 44.0 | 352.0 | 98.0   | 254.0  | 957.0  | 0 |
| 8  | 5 | 4  | 1 | 1 | 1 | 1 | 30  | 80  | 55.0 | 440.0 | 112.5  | 327.5  | 1284.5 | 0 |
| 8  | 5 | 5  | 1 | 1 | 1 | 1 | 28  | 100 | 64.0 | 512.0 | 98.0   | 414.0  | 1698.5 | 0 |
| 8  | 5 | 6  | 1 | 1 | 1 | 1 | 60  | 55  | 57.5 | 460.0 | 450.0  | 10.0   | 1708.5 | 0 |
| 8  | 5 | 7  | 1 | 1 | 1 | 1 | 100 | 60  | 80.0 | 640.0 | 1250.0 | -610.0 | 1098.5 | 0 |
| 8  | 5 | 8  | 1 | 1 | 1 | 1 | 60  | 65  | 62.5 | 500.0 | 450.0  | 50.0   | 1148.5 | 0 |
| 8  | 5 | 9  | 1 | 1 | 1 | 1 | 28  | 70  | 49.0 | 392.0 | 98.0   | 294.0  | 1442.5 | 0 |
| 8  | 5 | 10 | 1 | 1 | 1 | 1 | 28  | 65  | 46.5 | 372.0 | 98.0   | 274.0  | 1716.5 | 0 |
| 8  | 5 | 11 | 1 | 1 | 1 | 1 | 28  | 70  | 49.0 | 392.0 | 98.0   | 294.0  | 2010.5 | 0 |
| 8  | 5 | 12 | 1 | 1 | 1 | 1 | 28  | 50  | 39.0 | 312.0 | 98.0   | 214.0  | 2224.5 | 0 |
| 8  | 5 | 13 | 1 | 1 | 1 | 1 | 28  | 70  | 49.0 | 392.0 | 98.0   | 294.0  | 2518.5 | 0 |
| 8  | 5 | 14 | 1 | 1 | 1 | 1 | 28  | 75  | 51.5 | 412.0 | 98.0   | 314.0  | 2832.5 | 0 |
| 8  | 5 | 15 | 1 | 1 | 1 | 1 | 28  | 25  | 26.5 | 212.0 | 98.0   | 114.0  | 2946.5 | 0 |
| 8  | 5 | 16 | 1 | 1 | 1 | 1 | 28  | 25  | 26.5 | 212.0 | 98.0   | 114.0  | 3060.5 | 0 |
| 8  | 5 | 17 | 1 | 1 | 1 | 1 | 28  | 25  | 26.5 | 212.0 | 98.0   | 114.0  | 3174.5 | 0 |
| 8  | 5 | 18 | 1 | 1 | 1 | 1 | 25  | 25  | 25.0 | 200.0 | 78.1   | 121.9  | 3296.4 | 0 |
| 8  | 5 | 19 | 1 | 1 | 1 | 1 | 24  | 20  | 22.0 | 176.0 | 72.0   | 104.0  | 3400.4 | 0 |
| 8  | 5 | 20 | 1 | 1 | 1 | 1 | 25  | 25  | 25.0 | 200.0 | 78.1   | 121.9  | 3522.3 | 0 |
| 8  | 5 | 21 | 1 | 1 | 1 | 1 | 28  | 25  | 26.5 | 212.0 | 98.0   | 114.0  | 3636.3 | 0 |
| 8  | 5 | 22 | 1 | 1 | 1 | 1 | 28  | 25  | 26.5 | 212.0 | 98.0   | 114.0  | 3750.3 | 0 |

|    |   |    |   |   |   |   |     |     |      |       |        |        |         |   |
|----|---|----|---|---|---|---|-----|-----|------|-------|--------|--------|---------|---|
| 8  | 5 | 23 | 1 | 1 | 1 | 1 | 28  | 25  | 26.5 | 212.0 | 98.0   | 114.0  | 3864.3  | 0 |
| 8  | 5 | 24 | 1 | 1 | 1 | 1 | 25  | 25  | 25.0 | 200.0 | 78.1   | 121.9  | 3986.1  | 0 |
| 8  | 5 | 25 | 1 | 1 | 1 | 1 | 25  | 25  | 25.0 | 200.0 | 78.1   | 121.9  | 4108.0  | 0 |
| 8  | 5 | 26 | 1 | 1 | 1 | 1 | 25  | 25  | 25.0 | 200.0 | 78.1   | 121.9  | 4229.9  | 0 |
| 8  | 5 | 27 | 1 | 1 | 1 | 1 | 25  | 25  | 25.0 | 200.0 | 78.1   | 121.9  | 4351.8  | 0 |
| 8  | 5 | 28 | 1 | 1 | 1 | 1 | 25  | 25  | 25.0 | 200.0 | 78.1   | 121.9  | 4473.6  | 0 |
| 8  | 5 | 29 | 1 | 1 | 1 | 1 | 25  | 25  | 25.0 | 200.0 | 78.1   | 121.9  | 4595.5  | 0 |
| 8  | 5 | 30 | 1 | 1 | 1 | 1 | 25  | 25  | 25.0 | 200.0 | 78.1   | 121.9  | 4717.4  | 0 |
| 11 | 5 | 1  | 1 | 1 | 1 | 1 | 90  | 14  | 52.0 | 416.0 | 810.0  | -394.0 | -394.0  | 1 |
| 11 | 5 | 2  | 1 | 1 | 1 | 1 | 70  | 14  | 42.0 | 336.0 | 490.0  | -154.0 | -548.0  | 1 |
| 11 | 5 | 3  | 1 | 1 | 1 | 1 | 60  | 28  | 44.0 | 352.0 | 360.0  | -8.0   | -556.0  | 1 |
| 11 | 5 | 4  | 1 | 1 | 1 | 1 | 80  | 30  | 55.0 | 440.0 | 640.0  | -200.0 | -756.0  | 1 |
| 11 | 5 | 5  | 1 | 1 | 1 | 1 | 100 | 28  | 64.0 | 512.0 | 1000.0 | -488.0 | -1244.0 | 1 |
| 11 | 5 | 6  | 1 | 1 | 1 | 1 | 55  | 60  | 57.5 | 460.0 | 302.5  | 157.5  | -1086.5 | 1 |
| 11 | 5 | 7  | 1 | 1 | 1 | 1 | 60  | 100 | 80.0 | 640.0 | 360.0  | 280.0  | -806.5  | 1 |
| 11 | 5 | 8  | 1 | 1 | 1 | 1 | 65  | 60  | 62.5 | 500.0 | 422.5  | 77.5   | -729.0  | 1 |
| 11 | 5 | 9  | 1 | 1 | 1 | 1 | 70  | 28  | 49.0 | 392.0 | 490.0  | -98.0  | -827.0  | 1 |
| 11 | 5 | 10 | 1 | 1 | 1 | 1 | 65  | 28  | 46.5 | 372.0 | 422.5  | -50.5  | -877.5  | 1 |
| 11 | 5 | 11 | 1 | 1 | 1 | 1 | 70  | 28  | 49.0 | 392.0 | 490.0  | -98.0  | -975.5  | 1 |
| 11 | 5 | 12 | 1 | 1 | 1 | 1 | 50  | 28  | 39.0 | 312.0 | 250.0  | 62.0   | -913.5  | 1 |
| 11 | 5 | 13 | 1 | 1 | 1 | 1 | 70  | 28  | 49.0 | 392.0 | 490.0  | -98.0  | -1011.5 | 1 |
| 11 | 5 | 14 | 1 | 1 | 1 | 1 | 75  | 28  | 51.5 | 412.0 | 562.5  | -150.5 | -1162.0 | 1 |
| 11 | 5 | 15 | 1 | 1 | 1 | 1 | 25  | 28  | 26.5 | 212.0 | 62.5   | 149.5  | -1012.5 | 1 |
| 11 | 5 | 16 | 1 | 1 | 1 | 1 | 25  | 28  | 26.5 | 212.0 | 62.5   | 149.5  | -863.0  | 1 |
| 11 | 5 | 17 | 1 | 1 | 1 | 1 | 25  | 28  | 26.5 | 212.0 | 62.5   | 149.5  | -713.5  | 1 |
| 11 | 5 | 18 | 1 | 1 | 1 | 1 | 25  | 25  | 25.0 | 200.0 | 62.5   | 137.5  | -576.0  | 1 |
| 11 | 5 | 19 | 1 | 1 | 1 | 1 | 20  | 24  | 22.0 | 176.0 | 40.0   | 136.0  | -440.0  | 1 |
| 11 | 5 | 20 | 1 | 1 | 1 | 1 | 25  | 25  | 25.0 | 200.0 | 62.5   | 137.5  | -302.5  | 1 |
| 11 | 5 | 21 | 1 | 1 | 1 | 1 | 25  | 28  | 26.5 | 212.0 | 62.5   | 149.5  | -153.0  | 1 |
| 11 | 5 | 22 | 1 | 1 | 1 | 1 | 25  | 28  | 26.5 | 212.0 | 62.5   | 149.5  | -3.5    | 1 |
| 11 | 5 | 23 | 1 | 1 | 1 | 1 | 25  | 28  | 26.5 | 212.0 | 62.5   | 149.5  | 146.0   | 1 |
| 11 | 5 | 24 | 1 | 1 | 1 | 1 | 25  | 25  | 25.0 | 200.0 | 62.5   | 137.5  | 283.5   | 1 |
| 11 | 5 | 25 | 1 | 1 | 1 | 1 | 25  | 25  | 25.0 | 200.0 | 62.5   | 137.5  | 421.0   | 1 |
| 11 | 5 | 26 | 1 | 1 | 1 | 1 | 25  | 25  | 25.0 | 200.0 | 62.5   | 137.5  | 558.5   | 1 |
| 11 | 5 | 27 | 1 | 1 | 1 | 1 | 25  | 25  | 25.0 | 200.0 | 62.5   | 137.5  | 696.0   | 1 |
| 11 | 5 | 28 | 1 | 1 | 1 | 1 | 25  | 25  | 25.0 | 200.0 | 62.5   | 137.5  | 833.5   | 1 |
| 11 | 5 | 29 | 1 | 1 | 1 | 1 | 25  | 25  | 25.0 | 200.0 | 62.5   | 137.5  | 971.0   | 1 |
| 11 | 5 | 30 | 1 | 1 | 1 | 1 | 25  | 25  | 25.0 | 200.0 | 62.5   | 137.5  | 1108.5  | 1 |

|    |   |    |   |   |   |   |    |    |      |       |       |       |        |   |
|----|---|----|---|---|---|---|----|----|------|-------|-------|-------|--------|---|
| 9  | 6 | 1  | 1 | 0 | 1 | 0 | 35 | 8  | 0.0  | 245.0 | 122.5 | 122.5 | 122.5  | 1 |
| 9  | 6 | 2  | 1 | 0 | 1 | 0 | 37 | 10 | 0.0  | 259.0 | 136.9 | 122.1 | 244.6  | 1 |
| 9  | 6 | 3  | 1 | 0 | 0 | 0 | 39 | 12 | 0.0  | 273.0 | 152.1 | 120.9 | 365.5  | 1 |
| 9  | 6 | 4  | 1 | 0 | 0 | 0 | 40 | 16 | 0.0  | 280.0 | 160.0 | 120.0 | 485.5  | 1 |
| 9  | 6 | 5  | 1 | 1 | 1 | 1 | 51 | 10 | 30.5 | 244.0 | 260.1 | -16.1 | 469.4  | 1 |
| 9  | 6 | 6  | 1 | 0 | 0 | 0 | 40 | 10 | 0.0  | 280.0 | 160.0 | 120.0 | 589.4  | 1 |
| 9  | 6 | 7  | 1 | 0 | 1 | 0 | 35 | 20 | 0.0  | 245.0 | 122.5 | 122.5 | 711.9  | 1 |
| 9  | 6 | 8  | 1 | 0 | 0 | 0 | 50 | 28 | 0.0  | 350.0 | 250.0 | 100.0 | 811.9  | 1 |
| 9  | 6 | 9  | 1 | 0 | 1 | 0 | 34 | 5  | 0.0  | 238.0 | 115.6 | 122.4 | 934.3  | 1 |
| 9  | 6 | 10 | 1 | 0 | 0 | 0 | 35 | 6  | 0.0  | 245.0 | 122.5 | 122.5 | 1056.8 | 1 |
| 9  | 6 | 11 | 1 | 0 | 0 | 0 | 36 | 7  | 0.0  | 252.0 | 129.6 | 122.4 | 1179.2 | 1 |
| 9  | 6 | 12 | 1 | 1 | 0 | 0 | 35 | 10 | 0.0  | 245.0 | 122.5 | 122.5 | 1301.7 | 1 |
| 9  | 6 | 13 | 1 | 0 | 1 | 0 | 33 | 16 | 0.0  | 231.0 | 108.9 | 122.1 | 1423.8 | 1 |
| 9  | 6 | 14 | 1 | 1 | 1 | 1 | 35 | 5  | 20.0 | 160.0 | 122.5 | 37.5  | 1461.3 | 1 |
| 9  | 6 | 15 | 1 | 1 | 1 | 1 | 20 | 10 | 15.0 | 120.0 | 40.0  | 80.0  | 1541.3 | 1 |
| 9  | 6 | 16 | 1 | 0 | 1 | 0 | 35 | 16 | 0.0  | 245.0 | 122.5 | 122.5 | 1663.8 | 1 |
| 9  | 6 | 17 | 1 | 0 | 1 | 0 | 35 | 10 | 0.0  | 245.0 | 122.5 | 122.5 | 1786.3 | 1 |
| 9  | 6 | 18 | 1 | 0 | 1 | 0 | 34 | 20 | 0.0  | 238.0 | 115.6 | 122.4 | 1908.7 | 1 |
| 9  | 6 | 19 | 1 | 0 | 1 | 0 | 36 | 4  | 0.0  | 252.0 | 129.6 | 122.4 | 2031.1 | 1 |
| 9  | 6 | 20 | 1 | 0 | 1 | 0 | 34 | 10 | 0.0  | 238.0 | 115.6 | 122.4 | 2153.5 | 1 |
| 9  | 6 | 21 | 1 | 0 | 1 | 0 | 25 | 12 | 0.0  | 175.0 | 62.5  | 112.5 | 2266.0 | 1 |
| 9  | 6 | 22 | 1 | 0 | 1 | 0 | 30 | 10 | 0.0  | 210.0 | 90.0  | 120.0 | 2386.0 | 1 |
| 9  | 6 | 23 | 1 | 1 | 0 | 0 | 33 | 18 | 0.0  | 231.0 | 108.9 | 122.1 | 2508.1 | 1 |
| 9  | 6 | 24 | 1 | 0 | 1 | 0 | 30 | 11 | 0.0  | 210.0 | 90.0  | 120.0 | 2628.1 | 1 |
| 9  | 6 | 25 | 1 | 0 | 1 | 0 | 35 | 10 | 0.0  | 245.0 | 122.5 | 122.5 | 2750.6 | 1 |
| 9  | 6 | 26 | 1 | 0 | 1 | 0 | 31 | 10 | 0.0  | 217.0 | 96.1  | 120.9 | 2871.5 | 1 |
| 9  | 6 | 27 | 1 | 0 | 1 | 0 | 27 | 12 | 0.0  | 189.0 | 72.9  | 116.1 | 2987.6 | 1 |
| 9  | 6 | 28 | 1 | 0 | 1 | 0 | 34 | 12 | 0.0  | 238.0 | 115.6 | 122.4 | 3110.0 | 1 |
| 9  | 6 | 29 | 1 | 1 | 1 | 1 | 20 | 10 | 15.0 | 120.0 | 40.0  | 80.0  | 3190.0 | 1 |
| 9  | 6 | 30 | 1 | 0 | 1 | 0 | 30 | 14 | 0.0  | 210.0 | 90.0  | 120.0 | 3310.0 | 1 |
| 10 | 6 | 1  | 1 | 1 | 0 | 0 | 8  | 35 | 0.0  | 56.0  | 8.0   | 48.0  | 48.0   | 0 |
| 10 | 6 | 2  | 1 | 1 | 0 | 0 | 10 | 37 | 0.0  | 70.0  | 12.5  | 57.5  | 105.5  | 0 |
| 10 | 6 | 3  | 1 | 0 | 0 | 0 | 12 | 39 | 0.0  | 84.0  | 18.0  | 66.0  | 171.5  | 0 |
| 10 | 6 | 4  | 1 | 0 | 0 | 0 | 16 | 40 | 0.0  | 112.0 | 32.0  | 80.0  | 251.5  | 0 |
| 10 | 6 | 5  | 1 | 1 | 1 | 1 | 10 | 51 | 30.5 | 244.0 | 12.5  | 231.5 | 483.0  | 0 |
| 10 | 6 | 6  | 1 | 0 | 0 | 0 | 10 | 40 | 0.0  | 70.0  | 12.5  | 57.5  | 540.5  | 0 |
| 10 | 6 | 7  | 1 | 1 | 0 | 0 | 20 | 35 | 0.0  | 140.0 | 50.0  | 90.0  | 630.5  | 0 |
| 10 | 6 | 8  | 1 | 0 | 0 | 0 | 28 | 50 | 0.0  | 196.0 | 98.0  | 98.0  | 728.5  | 0 |

|    |   |    |   |   |   |   |    |    |      |       |      |       |        |   |
|----|---|----|---|---|---|---|----|----|------|-------|------|-------|--------|---|
| 10 | 6 | 9  | 1 | 1 | 0 | 0 | 5  | 34 | 0.0  | 35.0  | 3.1  | 31.9  | 760.4  | 0 |
| 10 | 6 | 10 | 1 | 0 | 0 | 0 | 6  | 35 | 0.0  | 42.0  | 4.5  | 37.5  | 797.9  | 0 |
| 10 | 6 | 11 | 1 | 0 | 0 | 0 | 7  | 36 | 0.0  | 49.0  | 6.1  | 42.9  | 840.8  | 0 |
| 10 | 6 | 12 | 1 | 0 | 1 | 0 | 10 | 35 | 0.0  | 70.0  | 12.5 | 57.5  | 898.3  | 0 |
| 10 | 6 | 13 | 1 | 1 | 0 | 0 | 16 | 33 | 0.0  | 112.0 | 32.0 | 80.0  | 978.3  | 0 |
| 10 | 6 | 14 | 1 | 1 | 1 | 1 | 5  | 35 | 20.0 | 160.0 | 3.1  | 156.9 | 1135.1 | 0 |
| 10 | 6 | 15 | 1 | 1 | 1 | 1 | 10 | 20 | 15.0 | 120.0 | 12.5 | 107.5 | 1242.6 | 0 |
| 10 | 6 | 16 | 1 | 1 | 0 | 0 | 16 | 35 | 0.0  | 112.0 | 32.0 | 80.0  | 1322.6 | 0 |
| 10 | 6 | 17 | 1 | 1 | 0 | 0 | 10 | 35 | 0.0  | 70.0  | 12.5 | 57.5  | 1380.1 | 0 |
| 10 | 6 | 18 | 1 | 1 | 0 | 0 | 20 | 34 | 0.0  | 140.0 | 50.0 | 90.0  | 1470.1 | 0 |
| 10 | 6 | 19 | 1 | 1 | 0 | 0 | 4  | 36 | 0.0  | 28.0  | 2.0  | 26.0  | 1496.1 | 0 |
| 10 | 6 | 20 | 1 | 1 | 0 | 0 | 10 | 34 | 0.0  | 70.0  | 12.5 | 57.5  | 1553.6 | 0 |
| 10 | 6 | 21 | 1 | 1 | 0 | 0 | 12 | 25 | 0.0  | 84.0  | 18.0 | 66.0  | 1619.6 | 0 |
| 10 | 6 | 22 | 1 | 1 | 0 | 0 | 10 | 30 | 0.0  | 70.0  | 12.5 | 57.5  | 1677.1 | 0 |
| 10 | 6 | 23 | 1 | 0 | 1 | 0 | 18 | 33 | 0.0  | 126.0 | 40.5 | 85.5  | 1762.6 | 0 |
| 10 | 6 | 24 | 1 | 1 | 0 | 0 | 11 | 30 | 0.0  | 77.0  | 15.1 | 61.9  | 1824.5 | 0 |
| 10 | 6 | 25 | 1 | 1 | 0 | 0 | 10 | 35 | 0.0  | 70.0  | 12.5 | 57.5  | 1882.0 | 0 |
| 10 | 6 | 26 | 1 | 1 | 0 | 0 | 10 | 31 | 0.0  | 70.0  | 12.5 | 57.5  | 1939.5 | 0 |
| 10 | 6 | 27 | 1 | 1 | 0 | 0 | 12 | 27 | 0.0  | 84.0  | 18.0 | 66.0  | 2005.5 | 0 |
| 10 | 6 | 28 | 1 | 1 | 0 | 0 | 12 | 34 | 0.0  | 84.0  | 18.0 | 66.0  | 2071.5 | 0 |
| 10 | 6 | 29 | 1 | 1 | 1 | 1 | 10 | 20 | 15.0 | 120.0 | 12.5 | 107.5 | 2179.0 | 0 |
| 10 | 6 | 30 | 1 | 1 | 0 | 0 | 14 | 30 | 0.0  | 98.0  | 24.5 | 73.5  | 2252.5 | 0 |
| 13 | 7 | 1  | 1 | 0 | 1 | 0 | 28 | 35 | 0.0  | 196.0 | 98.0 | 98.0  | 98.0   | 0 |
| 13 | 7 | 2  | 1 | 0 | 1 | 0 | 28 | 35 | 0.0  | 196.0 | 98.0 | 98.0  | 196.0  | 0 |
| 13 | 7 | 3  | 1 | 0 | 1 | 0 | 28 | 35 | 0.0  | 196.0 | 98.0 | 98.0  | 294.0  | 0 |
| 13 | 7 | 4  | 1 | 1 | 1 | 1 | 28 | 35 | 31.5 | 252.0 | 98.0 | 154.0 | 448.0  | 0 |
| 13 | 7 | 5  | 1 | 1 | 1 | 1 | 28 | 35 | 31.5 | 252.0 | 98.0 | 154.0 | 602.0  | 0 |
| 13 | 7 | 6  | 1 | 1 | 1 | 1 | 28 | 35 | 31.5 | 252.0 | 98.0 | 154.0 | 756.0  | 0 |
| 13 | 7 | 7  | 1 | 1 | 1 | 1 | 28 | 35 | 31.5 | 252.0 | 98.0 | 154.0 | 910.0  | 0 |
| 13 | 7 | 8  | 1 | 1 | 1 | 1 | 28 | 35 | 31.5 | 252.0 | 98.0 | 154.0 | 1064.0 | 0 |
| 13 | 7 | 9  | 1 | 1 | 1 | 1 | 28 | 35 | 31.5 | 252.0 | 98.0 | 154.0 | 1218.0 | 0 |
| 13 | 7 | 10 | 1 | 1 | 1 | 1 | 28 | 35 | 31.5 | 252.0 | 98.0 | 154.0 | 1372.0 | 0 |
| 13 | 7 | 11 | 1 | 1 | 1 | 1 | 28 | 35 | 31.5 | 252.0 | 98.0 | 154.0 | 1526.0 | 0 |
| 13 | 7 | 12 | 1 | 1 | 1 | 1 | 28 | 35 | 31.5 | 252.0 | 98.0 | 154.0 | 1680.0 | 0 |
| 13 | 7 | 13 | 1 | 1 | 1 | 1 | 28 | 35 | 31.5 | 252.0 | 98.0 | 154.0 | 1834.0 | 0 |
| 13 | 7 | 14 | 1 | 1 | 1 | 1 | 28 | 35 | 31.5 | 252.0 | 98.0 | 154.0 | 1988.0 | 0 |
| 13 | 7 | 15 | 1 | 1 | 1 | 1 | 28 | 35 | 31.5 | 252.0 | 98.0 | 154.0 | 2142.0 | 0 |
| 13 | 7 | 16 | 1 | 1 | 1 | 1 | 28 | 35 | 31.5 | 252.0 | 98.0 | 154.0 | 2296.0 | 0 |



|    |   |    |   |   |   |   |    |    |      |       |       |       |        |   |
|----|---|----|---|---|---|---|----|----|------|-------|-------|-------|--------|---|
| 13 | 7 | 17 | 1 | 1 | 1 | 1 | 28 | 35 | 31.5 | 252.0 | 98.0  | 154.0 | 2450.0 | 0 |
| 13 | 7 | 18 | 1 | 1 | 1 | 1 | 28 | 35 | 31.5 | 252.0 | 98.0  | 154.0 | 2604.0 | 0 |
| 13 | 7 | 19 | 1 | 1 | 1 | 1 | 28 | 35 | 31.5 | 252.0 | 98.0  | 154.0 | 2758.0 | 0 |
| 13 | 7 | 20 | 1 | 1 | 1 | 1 | 28 | 35 | 31.5 | 252.0 | 98.0  | 154.0 | 2912.0 | 0 |
| 13 | 7 | 21 | 1 | 1 | 1 | 1 | 28 | 35 | 31.5 | 252.0 | 98.0  | 154.0 | 3066.0 | 0 |
| 13 | 7 | 22 | 1 | 1 | 1 | 1 | 28 | 35 | 31.5 | 252.0 | 98.0  | 154.0 | 3220.0 | 0 |
| 13 | 7 | 23 | 1 | 1 | 1 | 1 | 28 | 35 | 31.5 | 252.0 | 98.0  | 154.0 | 3374.0 | 0 |
| 13 | 7 | 24 | 1 | 1 | 1 | 1 | 28 | 35 | 31.5 | 252.0 | 98.0  | 154.0 | 3528.0 | 0 |
| 13 | 7 | 25 | 1 | 1 | 1 | 1 | 28 | 35 | 31.5 | 252.0 | 98.0  | 154.0 | 3682.0 | 0 |
| 13 | 7 | 26 | 1 | 1 | 1 | 1 | 28 | 35 | 31.5 | 252.0 | 98.0  | 154.0 | 3836.0 | 0 |
| 13 | 7 | 27 | 1 | 1 | 1 | 1 | 28 | 35 | 31.5 | 252.0 | 98.0  | 154.0 | 3990.0 | 0 |
| 13 | 7 | 28 | 1 | 1 | 1 | 1 | 28 | 35 | 31.5 | 252.0 | 98.0  | 154.0 | 4144.0 | 0 |
| 13 | 7 | 29 | 1 | 1 | 1 | 1 | 28 | 35 | 31.5 | 252.0 | 98.0  | 154.0 | 4298.0 | 0 |
| 13 | 7 | 30 | 1 | 1 | 1 | 1 | 28 | 35 | 31.5 | 252.0 | 98.0  | 154.0 | 4452.0 | 0 |
| 16 | 7 | 1  | 1 | 1 | 0 | 0 | 35 | 28 | 0.0  | 245.0 | 122.5 | 122.5 | 122.5  | 1 |
| 16 | 7 | 2  | 1 | 1 | 0 | 0 | 35 | 28 | 0.0  | 245.0 | 122.5 | 122.5 | 245.0  | 1 |
| 16 | 7 | 3  | 1 | 1 | 0 | 0 | 35 | 28 | 0.0  | 245.0 | 122.5 | 122.5 | 367.5  | 1 |
| 16 | 7 | 4  | 1 | 1 | 1 | 1 | 35 | 28 | 31.5 | 252.0 | 122.5 | 129.5 | 497.0  | 1 |
| 16 | 7 | 5  | 1 | 1 | 1 | 1 | 35 | 28 | 31.5 | 252.0 | 122.5 | 129.5 | 626.5  | 1 |
| 16 | 7 | 6  | 1 | 1 | 1 | 1 | 35 | 28 | 31.5 | 252.0 | 122.5 | 129.5 | 756.0  | 1 |
| 16 | 7 | 7  | 1 | 1 | 1 | 1 | 35 | 28 | 31.5 | 252.0 | 122.5 | 129.5 | 885.5  | 1 |
| 16 | 7 | 8  | 1 | 1 | 1 | 1 | 35 | 28 | 31.5 | 252.0 | 122.5 | 129.5 | 1015.0 | 1 |
| 16 | 7 | 9  | 1 | 1 | 1 | 1 | 35 | 28 | 31.5 | 252.0 | 122.5 | 129.5 | 1144.5 | 1 |
| 16 | 7 | 10 | 1 | 1 | 1 | 1 | 35 | 28 | 31.5 | 252.0 | 122.5 | 129.5 | 1274.0 | 1 |
| 16 | 7 | 11 | 1 | 1 | 1 | 1 | 35 | 28 | 31.5 | 252.0 | 122.5 | 129.5 | 1403.5 | 1 |
| 16 | 7 | 12 | 1 | 1 | 1 | 1 | 35 | 28 | 31.5 | 252.0 | 122.5 | 129.5 | 1533.0 | 1 |
| 16 | 7 | 13 | 1 | 1 | 1 | 1 | 35 | 28 | 31.5 | 252.0 | 122.5 | 129.5 | 1662.5 | 1 |
| 16 | 7 | 14 | 1 | 1 | 1 | 1 | 35 | 28 | 31.5 | 252.0 | 122.5 | 129.5 | 1792.0 | 1 |
| 16 | 7 | 15 | 1 | 1 | 1 | 1 | 35 | 28 | 31.5 | 252.0 | 122.5 | 129.5 | 1921.5 | 1 |
| 16 | 7 | 16 | 1 | 1 | 1 | 1 | 35 | 28 | 31.5 | 252.0 | 122.5 | 129.5 | 2051.0 | 1 |
| 16 | 7 | 17 | 1 | 1 | 1 | 1 | 35 | 28 | 31.5 | 252.0 | 122.5 | 129.5 | 2180.5 | 1 |
| 16 | 7 | 18 | 1 | 1 | 1 | 1 | 35 | 28 | 31.5 | 252.0 | 122.5 | 129.5 | 2310.0 | 1 |
| 16 | 7 | 19 | 1 | 1 | 1 | 1 | 35 | 28 | 31.5 | 252.0 | 122.5 | 129.5 | 2439.5 | 1 |
| 16 | 7 | 20 | 1 | 1 | 1 | 1 | 35 | 28 | 31.5 | 252.0 | 122.5 | 129.5 | 2569.0 | 1 |
| 16 | 7 | 21 | 1 | 1 | 1 | 1 | 35 | 28 | 31.5 | 252.0 | 122.5 | 129.5 | 2698.5 | 1 |
| 16 | 7 | 22 | 1 | 1 | 1 | 1 | 35 | 28 | 31.5 | 252.0 | 122.5 | 129.5 | 2828.0 | 1 |
| 16 | 7 | 23 | 1 | 1 | 1 | 1 | 35 | 28 | 31.5 | 252.0 | 122.5 | 129.5 | 2957.5 | 1 |
| 16 | 7 | 24 | 1 | 1 | 1 | 1 | 35 | 28 | 31.5 | 252.0 | 122.5 | 129.5 | 3087.0 | 1 |

|    |   |    |   |   |   |   |    |    |      |       |       |       |        |   |
|----|---|----|---|---|---|---|----|----|------|-------|-------|-------|--------|---|
| 16 | 7 | 25 | 1 | 1 | 1 | 1 | 35 | 28 | 31.5 | 252.0 | 122.5 | 129.5 | 3216.5 | 1 |
| 16 | 7 | 26 | 1 | 1 | 1 | 1 | 35 | 28 | 31.5 | 252.0 | 122.5 | 129.5 | 3346.0 | 1 |
| 16 | 7 | 27 | 1 | 1 | 1 | 1 | 35 | 28 | 31.5 | 252.0 | 122.5 | 129.5 | 3475.5 | 1 |
| 16 | 7 | 28 | 1 | 1 | 1 | 1 | 35 | 28 | 31.5 | 252.0 | 122.5 | 129.5 | 3605.0 | 1 |
| 16 | 7 | 29 | 1 | 1 | 1 | 1 | 35 | 28 | 31.5 | 252.0 | 122.5 | 129.5 | 3734.5 | 1 |
| 16 | 7 | 30 | 1 | 1 | 1 | 1 | 35 | 28 | 31.5 | 252.0 | 122.5 | 129.5 | 3864.0 | 1 |
| 14 | 8 | 1  | 1 | 0 | 1 | 0 | 35 | 27 | 0.0  | 245.0 | 122.5 | 122.5 | 122.5  | 1 |
| 14 | 8 | 2  | 1 | 0 | 1 | 0 | 35 | 28 | 0.0  | 245.0 | 122.5 | 122.5 | 245.0  | 1 |
| 14 | 8 | 3  | 1 | 0 | 1 | 0 | 35 | 28 | 0.0  | 245.0 | 122.5 | 122.5 | 367.5  | 1 |
| 14 | 8 | 4  | 1 | 0 | 1 | 0 | 39 | 28 | 0.0  | 273.0 | 152.1 | 120.9 | 488.4  | 1 |
| 14 | 8 | 5  | 1 | 1 | 1 | 1 | 35 | 28 | 31.5 | 252.0 | 122.5 | 129.5 | 617.9  | 1 |
| 14 | 8 | 6  | 1 | 1 | 1 | 1 | 50 | 29 | 39.5 | 316.0 | 250.0 | 66.0  | 683.9  | 1 |
| 14 | 8 | 7  | 1 | 1 | 1 | 1 | 25 | 29 | 27.0 | 216.0 | 62.5  | 153.5 | 837.4  | 1 |
| 14 | 8 | 8  | 1 | 1 | 1 | 1 | 15 | 30 | 22.5 | 180.0 | 22.5  | 157.5 | 994.9  | 1 |
| 14 | 8 | 9  | 1 | 1 | 1 | 1 | 10 | 28 | 19.0 | 152.0 | 10.0  | 142.0 | 1136.9 | 1 |
| 14 | 8 | 10 | 1 | 1 | 0 | 0 | 35 | 28 | 0.0  | 245.0 | 122.5 | 122.5 | 1259.4 | 1 |
| 14 | 8 | 11 | 1 | 1 | 1 | 1 | 30 | 25 | 27.5 | 220.0 | 90.0  | 130.0 | 1389.4 | 1 |
| 14 | 8 | 12 | 1 | 1 | 1 | 1 | 60 | 29 | 44.5 | 356.0 | 360.0 | -4.0  | 1385.4 | 1 |
| 14 | 8 | 13 | 1 | 1 | 1 | 1 | 30 | 30 | 30.0 | 240.0 | 90.0  | 150.0 | 1535.4 | 1 |
| 14 | 8 | 14 | 1 | 1 | 1 | 1 | 25 | 30 | 27.5 | 220.0 | 62.5  | 157.5 | 1692.9 | 1 |
| 14 | 8 | 15 | 1 | 1 | 1 | 1 | 20 | 29 | 24.5 | 196.0 | 40.0  | 156.0 | 1848.9 | 1 |
| 14 | 8 | 16 | 1 | 1 | 1 | 1 | 23 | 29 | 26.0 | 208.0 | 52.9  | 155.1 | 2004.0 | 1 |
| 14 | 8 | 17 | 1 | 1 | 1 | 1 | 26 | 27 | 26.5 | 212.0 | 67.6  | 144.4 | 2148.4 | 1 |
| 14 | 8 | 18 | 1 | 1 | 1 | 1 | 23 | 27 | 25.0 | 200.0 | 52.9  | 147.1 | 2295.5 | 1 |
| 14 | 8 | 19 | 1 | 1 | 1 | 1 | 33 | 23 | 28.0 | 224.0 | 108.9 | 115.1 | 2410.6 | 1 |
| 14 | 8 | 20 | 1 | 0 | 1 | 0 | 35 | 28 | 0.0  | 245.0 | 122.5 | 122.5 | 2533.1 | 1 |
| 14 | 8 | 21 | 1 | 1 | 1 | 1 | 15 | 28 | 21.5 | 172.0 | 22.5  | 149.5 | 2682.6 | 1 |
| 14 | 8 | 22 | 1 | 1 | 1 | 1 | 15 | 24 | 19.5 | 156.0 | 22.5  | 133.5 | 2816.1 | 1 |
| 14 | 8 | 23 | 1 | 1 | 0 | 0 | 19 | 28 | 0.0  | 133.0 | 36.1  | 96.9  | 2913.0 | 1 |
| 14 | 8 | 24 | 1 | 1 | 1 | 1 | 19 | 27 | 23.0 | 184.0 | 36.1  | 147.9 | 3060.9 | 1 |
| 14 | 8 | 25 | 1 | 1 | 0 | 0 | 35 | 28 | 0.0  | 245.0 | 122.5 | 122.5 | 3183.4 | 1 |
| 14 | 8 | 26 | 1 | 1 | 1 | 1 | 20 | 20 | 20.0 | 160.0 | 40.0  | 120.0 | 3303.4 | 1 |
| 14 | 8 | 27 | 1 | 1 | 1 | 1 | 24 | 19 | 21.5 | 172.0 | 57.6  | 114.4 | 3417.8 | 1 |
| 14 | 8 | 28 | 1 | 0 | 1 | 0 | 35 | 28 | 0.0  | 245.0 | 122.5 | 122.5 | 3540.3 | 1 |
| 14 | 8 | 29 | 1 | 1 | 1 | 1 | 12 | 20 | 16.0 | 128.0 | 14.4  | 113.6 | 3653.9 | 1 |
| 14 | 8 | 30 | 1 | 1 | 0 | 0 | 35 | 28 | 0.0  | 245.0 | 122.5 | 122.5 | 3776.4 | 1 |
| 15 | 8 | 1  | 1 | 1 | 0 | 0 | 27 | 35 | 0.0  | 189.0 | 91.1  | 97.9  | 97.9   | 0 |
| 15 | 8 | 2  | 1 | 1 | 0 | 0 | 28 | 35 | 0.0  | 196.0 | 98.0  | 98.0  | 195.9  | 0 |

|    |   |    |   |   |   |   |    |    |      |       |       |       |        |   |
|----|---|----|---|---|---|---|----|----|------|-------|-------|-------|--------|---|
| 15 | 8 | 3  | 1 | 1 | 0 | 0 | 28 | 35 | 0.0  | 196.0 | 98.0  | 98.0  | 293.9  | 0 |
| 15 | 8 | 4  | 1 | 1 | 0 | 0 | 28 | 39 | 0.0  | 196.0 | 98.0  | 98.0  | 391.9  | 0 |
| 15 | 8 | 5  | 1 | 1 | 1 | 1 | 28 | 35 | 31.5 | 252.0 | 98.0  | 154.0 | 545.9  | 0 |
| 15 | 8 | 6  | 1 | 1 | 1 | 1 | 29 | 50 | 39.5 | 316.0 | 105.1 | 210.9 | 756.8  | 0 |
| 15 | 8 | 7  | 1 | 1 | 1 | 1 | 29 | 25 | 27.0 | 216.0 | 105.1 | 110.9 | 867.6  | 0 |
| 15 | 8 | 8  | 1 | 1 | 1 | 1 | 30 | 15 | 22.5 | 180.0 | 112.5 | 67.5  | 935.1  | 0 |
| 15 | 8 | 9  | 1 | 1 | 1 | 1 | 28 | 10 | 19.0 | 152.0 | 98.0  | 54.0  | 989.1  | 0 |
| 15 | 8 | 10 | 1 | 0 | 1 | 0 | 28 | 35 | 0.0  | 196.0 | 98.0  | 98.0  | 1087.1 | 0 |
| 15 | 8 | 11 | 1 | 1 | 1 | 1 | 25 | 30 | 27.5 | 220.0 | 78.1  | 141.9 | 1229.0 | 0 |
| 15 | 8 | 12 | 1 | 1 | 1 | 1 | 29 | 60 | 44.5 | 356.0 | 105.1 | 250.9 | 1479.9 | 0 |
| 15 | 8 | 13 | 1 | 1 | 1 | 1 | 30 | 30 | 30.0 | 240.0 | 112.5 | 127.5 | 1607.4 | 0 |
| 15 | 8 | 14 | 1 | 1 | 1 | 1 | 30 | 25 | 27.5 | 220.0 | 112.5 | 107.5 | 1714.9 | 0 |
| 15 | 8 | 15 | 1 | 1 | 1 | 1 | 29 | 20 | 24.5 | 196.0 | 105.1 | 90.9  | 1805.8 | 0 |
| 15 | 8 | 16 | 1 | 1 | 1 | 1 | 29 | 23 | 26.0 | 208.0 | 105.1 | 102.9 | 1908.6 | 0 |
| 15 | 8 | 17 | 1 | 1 | 1 | 1 | 27 | 26 | 26.5 | 212.0 | 91.1  | 120.9 | 2029.5 | 0 |
| 15 | 8 | 18 | 1 | 1 | 1 | 1 | 27 | 23 | 25.0 | 200.0 | 91.1  | 108.9 | 2138.4 | 0 |
| 15 | 8 | 19 | 1 | 1 | 1 | 1 | 23 | 33 | 28.0 | 224.0 | 66.1  | 157.9 | 2296.3 | 0 |
| 15 | 8 | 20 | 1 | 1 | 0 | 0 | 28 | 35 | 0.0  | 196.0 | 98.0  | 98.0  | 2394.3 | 0 |
| 15 | 8 | 21 | 1 | 1 | 1 | 1 | 28 | 15 | 21.5 | 172.0 | 98.0  | 74.0  | 2468.3 | 0 |
| 15 | 8 | 22 | 1 | 1 | 1 | 1 | 24 | 15 | 19.5 | 156.0 | 72.0  | 84.0  | 2552.3 | 0 |
| 15 | 8 | 23 | 1 | 0 | 1 | 0 | 28 | 19 | 0.0  | 196.0 | 98.0  | 98.0  | 2650.3 | 0 |
| 15 | 8 | 24 | 1 | 1 | 1 | 1 | 27 | 19 | 23.0 | 184.0 | 91.1  | 92.9  | 2743.1 | 0 |
| 15 | 8 | 25 | 1 | 0 | 1 | 0 | 28 | 35 | 0.0  | 196.0 | 98.0  | 98.0  | 2841.1 | 0 |
| 15 | 8 | 26 | 1 | 1 | 1 | 1 | 20 | 20 | 20.0 | 160.0 | 50.0  | 110.0 | 2951.1 | 0 |
| 15 | 8 | 27 | 1 | 1 | 1 | 1 | 19 | 24 | 21.5 | 172.0 | 45.1  | 126.9 | 3078.0 | 0 |
| 15 | 8 | 28 | 1 | 1 | 0 | 0 | 28 | 35 | 0.0  | 196.0 | 98.0  | 98.0  | 3176.0 | 0 |
| 15 | 8 | 29 | 1 | 1 | 1 | 1 | 20 | 12 | 16.0 | 128.0 | 50.0  | 78.0  | 3254.0 | 0 |
| 15 | 8 | 30 | 1 | 0 | 1 | 0 | 28 | 35 | 0.0  | 196.0 | 98.0  | 98.0  | 3352.0 | 0 |
| 17 | 9 | 1  | 2 | 1 | 1 | 1 | 10 | 80 | 45.0 | 360.0 | 10.0  | 350.0 | 350.0  | 1 |
| 17 | 9 | 2  | 2 | 1 | 1 | 1 | 20 | 70 | 45.0 | 360.0 | 40.0  | 320.0 | 670.0  | 1 |
| 17 | 9 | 3  | 2 | 1 | 0 | 0 | 40 | 36 | 0.0  | 280.0 | 160.0 | 120.0 | 790.0  | 1 |
| 17 | 9 | 4  | 2 | 0 | 0 | 0 | 30 | 47 | 0.0  | 210.0 | 90.0  | 120.0 | 910.0  | 1 |
| 17 | 9 | 5  | 2 | 0 | 1 | 0 | 30 | 28 | 0.0  | 210.0 | 90.0  | 120.0 | 1030.0 | 1 |
| 17 | 9 | 6  | 2 | 1 | 1 | 1 | 45 | 50 | 47.5 | 380.0 | 202.5 | 177.5 | 1207.5 | 1 |
| 17 | 9 | 7  | 2 | 1 | 0 | 0 | 41 | 35 | 0.0  | 287.0 | 168.1 | 118.9 | 1326.4 | 1 |
| 17 | 9 | 8  | 2 | 1 | 1 | 1 | 10 | 45 | 27.5 | 220.0 | 10.0  | 210.0 | 1536.4 | 1 |
| 17 | 9 | 9  | 2 | 1 | 0 | 0 | 29 | 28 | 0.0  | 203.0 | 84.1  | 118.9 | 1655.3 | 1 |
| 17 | 9 | 10 | 2 | 1 | 0 | 0 | 35 | 28 | 0.0  | 245.0 | 122.5 | 122.5 | 1777.8 | 1 |

|    |   |    |   |   |   |   |    |    |      |       |       |        |        |   |
|----|---|----|---|---|---|---|----|----|------|-------|-------|--------|--------|---|
| 17 | 9 | 11 | 2 | 1 | 0 | 0 | 35 | 48 | 0.0  | 245.0 | 122.5 | 122.5  | 1900.3 | 1 |
| 17 | 9 | 12 | 2 | 1 | 0 | 0 | 35 | 27 | 0.0  | 245.0 | 122.5 | 122.5  | 2022.8 | 1 |
| 17 | 9 | 13 | 2 | 0 | 0 | 0 | 35 | 35 | 0.0  | 245.0 | 122.5 | 122.5  | 2145.3 | 1 |
| 17 | 9 | 14 | 2 | 1 | 0 | 0 | 36 | 28 | 0.0  | 252.0 | 129.6 | 122.4  | 2267.7 | 1 |
| 17 | 9 | 15 | 2 | 0 | 0 | 0 | 35 | 28 | 0.0  | 245.0 | 122.5 | 122.5  | 2390.2 | 1 |
| 17 | 9 | 16 | 2 | 1 | 0 | 0 | 35 | 28 | 0.0  | 245.0 | 122.5 | 122.5  | 2512.7 | 1 |
| 17 | 9 | 17 | 2 | 1 | 0 | 0 | 35 | 28 | 0.0  | 245.0 | 122.5 | 122.5  | 2635.2 | 1 |
| 17 | 9 | 18 | 2 | 1 | 0 | 0 | 35 | 28 | 0.0  | 245.0 | 122.5 | 122.5  | 2757.7 | 1 |
| 17 | 9 | 19 | 2 | 1 | 0 | 0 | 35 | 28 | 0.0  | 245.0 | 122.5 | 122.5  | 2880.2 | 1 |
| 17 | 9 | 20 | 2 | 1 | 0 | 0 | 35 | 28 | 0.0  | 245.0 | 122.5 | 122.5  | 3002.7 | 1 |
| 17 | 9 | 21 | 2 | 1 | 0 | 0 | 35 | 28 | 0.0  | 245.0 | 122.5 | 122.5  | 3125.2 | 1 |
| 17 | 9 | 22 | 2 | 0 | 0 | 0 | 35 | 28 | 0.0  | 245.0 | 122.5 | 122.5  | 3247.7 | 1 |
| 17 | 9 | 23 | 2 | 0 | 0 | 0 | 35 | 28 | 0.0  | 245.0 | 122.5 | 122.5  | 3370.2 | 1 |
| 17 | 9 | 24 | 2 | 0 | 0 | 0 | 35 | 28 | 0.0  | 245.0 | 122.5 | 122.5  | 3492.7 | 1 |
| 17 | 9 | 25 | 2 | 0 | 0 | 0 | 35 | 28 | 0.0  | 245.0 | 122.5 | 122.5  | 3615.2 | 1 |
| 17 | 9 | 26 | 2 | 1 | 0 | 0 | 35 | 28 | 0.0  | 245.0 | 122.5 | 122.5  | 3737.7 | 1 |
| 17 | 9 | 27 | 2 | 0 | 0 | 0 | 35 | 28 | 0.0  | 245.0 | 122.5 | 122.5  | 3860.2 | 1 |
| 17 | 9 | 28 | 2 | 0 | 0 | 0 | 35 | 28 | 0.0  | 245.0 | 122.5 | 122.5  | 3982.7 | 1 |
| 17 | 9 | 29 | 2 | 0 | 0 | 0 | 35 | 28 | 0.0  | 245.0 | 122.5 | 122.5  | 4105.2 | 1 |
| 17 | 9 | 30 | 2 | 0 | 0 | 0 | 35 | 28 | 0.0  | 245.0 | 122.5 | 122.5  | 4227.7 | 1 |
| 24 | 9 | 1  | 2 | 1 | 1 | 1 | 80 | 10 | 45.0 | 360.0 | 800.0 | -440.0 | -440.0 | 0 |
| 24 | 9 | 2  | 2 | 1 | 1 | 1 | 70 | 20 | 45.0 | 360.0 | 612.5 | -252.5 | -692.5 | 0 |
| 24 | 9 | 3  | 2 | 0 | 1 | 0 | 36 | 40 | 0.0  | 252.0 | 162.0 | 90.0   | -602.5 | 0 |
| 24 | 9 | 4  | 2 | 0 | 0 | 0 | 47 | 30 | 0.0  | 329.0 | 276.1 | 52.9   | -549.6 | 0 |
| 24 | 9 | 5  | 2 | 1 | 0 | 0 | 28 | 30 | 0.0  | 196.0 | 98.0  | 98.0   | -451.6 | 0 |
| 24 | 9 | 6  | 2 | 1 | 1 | 1 | 50 | 45 | 47.5 | 380.0 | 312.5 | 67.5   | -384.1 | 0 |
| 24 | 9 | 7  | 2 | 0 | 1 | 0 | 35 | 41 | 0.0  | 245.0 | 153.1 | 91.9   | -292.3 | 0 |
| 24 | 9 | 8  | 2 | 1 | 1 | 1 | 45 | 10 | 27.5 | 220.0 | 253.1 | -33.1  | -325.4 | 0 |
| 24 | 9 | 9  | 2 | 0 | 1 | 0 | 28 | 29 | 0.0  | 196.0 | 98.0  | 98.0   | -227.4 | 0 |
| 24 | 9 | 10 | 2 | 0 | 1 | 0 | 28 | 35 | 0.0  | 196.0 | 98.0  | 98.0   | -129.4 | 0 |
| 24 | 9 | 11 | 2 | 0 | 1 | 0 | 48 | 35 | 0.0  | 336.0 | 288.0 | 48.0   | -81.4  | 0 |
| 24 | 9 | 12 | 2 | 0 | 1 | 0 | 27 | 35 | 0.0  | 189.0 | 91.1  | 97.9   | 16.5   | 0 |
| 24 | 9 | 13 | 2 | 0 | 0 | 0 | 35 | 35 | 0.0  | 245.0 | 153.1 | 91.9   | 108.4  | 0 |
| 24 | 9 | 14 | 2 | 0 | 1 | 0 | 28 | 36 | 0.0  | 196.0 | 98.0  | 98.0   | 206.4  | 0 |
| 24 | 9 | 15 | 2 | 0 | 0 | 0 | 28 | 35 | 0.0  | 196.0 | 98.0  | 98.0   | 304.4  | 0 |
| 24 | 9 | 16 | 2 | 0 | 1 | 0 | 28 | 35 | 0.0  | 196.0 | 98.0  | 98.0   | 402.4  | 0 |
| 24 | 9 | 17 | 2 | 0 | 1 | 0 | 28 | 35 | 0.0  | 196.0 | 98.0  | 98.0   | 500.4  | 0 |
| 24 | 9 | 18 | 2 | 0 | 1 | 0 | 28 | 35 | 0.0  | 196.0 | 98.0  | 98.0   | 598.4  | 0 |

|    |    |    |   |   |   |   |    |    |      |       |       |       |        |   |
|----|----|----|---|---|---|---|----|----|------|-------|-------|-------|--------|---|
| 24 | 9  | 19 | 2 | 0 | 1 | 0 | 28 | 35 | 0.0  | 196.0 | 98.0  | 98.0  | 696.4  | 0 |
| 24 | 9  | 20 | 2 | 0 | 1 | 0 | 28 | 35 | 0.0  | 196.0 | 98.0  | 98.0  | 794.4  | 0 |
| 24 | 9  | 21 | 2 | 0 | 1 | 0 | 28 | 35 | 0.0  | 196.0 | 98.0  | 98.0  | 892.4  | 0 |
| 24 | 9  | 22 | 2 | 0 | 0 | 0 | 28 | 35 | 0.0  | 196.0 | 98.0  | 98.0  | 990.4  | 0 |
| 24 | 9  | 23 | 2 | 0 | 0 | 0 | 28 | 35 | 0.0  | 196.0 | 98.0  | 98.0  | 1088.4 | 0 |
| 24 | 9  | 24 | 2 | 0 | 0 | 0 | 28 | 35 | 0.0  | 196.0 | 98.0  | 98.0  | 1186.4 | 0 |
| 24 | 9  | 25 | 2 | 0 | 0 | 0 | 28 | 35 | 0.0  | 196.0 | 98.0  | 98.0  | 1284.4 | 0 |
| 24 | 9  | 26 | 2 | 0 | 1 | 0 | 28 | 35 | 0.0  | 196.0 | 98.0  | 98.0  | 1382.4 | 0 |
| 24 | 9  | 27 | 2 | 0 | 0 | 0 | 28 | 35 | 0.0  | 196.0 | 98.0  | 98.0  | 1480.4 | 0 |
| 24 | 9  | 28 | 2 | 0 | 0 | 0 | 28 | 35 | 0.0  | 196.0 | 98.0  | 98.0  | 1578.4 | 0 |
| 24 | 9  | 29 | 2 | 0 | 0 | 0 | 28 | 35 | 0.0  | 196.0 | 98.0  | 98.0  | 1676.4 | 0 |
| 24 | 9  | 30 | 2 | 0 | 0 | 0 | 28 | 35 | 0.0  | 196.0 | 98.0  | 98.0  | 1774.4 | 0 |
| 18 | 10 | 1  | 2 | 0 | 0 | 0 | 28 | 17 | 0.0  | 196.0 | 98.0  | 98.0  | 98.0   | 0 |
| 18 | 10 | 2  | 2 | 0 | 0 | 0 | 28 | 35 | 0.0  | 196.0 | 98.0  | 98.0  | 196.0  | 0 |
| 18 | 10 | 3  | 2 | 1 | 1 | 1 | 28 | 35 | 31.5 | 252.0 | 98.0  | 154.0 | 350.0  | 0 |
| 18 | 10 | 4  | 2 | 1 | 1 | 1 | 28 | 40 | 34.0 | 272.0 | 98.0  | 174.0 | 524.0  | 0 |
| 18 | 10 | 5  | 2 | 1 | 1 | 1 | 35 | 45 | 40.0 | 320.0 | 153.1 | 166.9 | 690.9  | 0 |
| 18 | 10 | 6  | 2 | 1 | 1 | 1 | 25 | 35 | 30.0 | 240.0 | 78.1  | 161.9 | 852.8  | 0 |
| 18 | 10 | 7  | 2 | 1 | 1 | 1 | 28 | 35 | 31.5 | 252.0 | 98.0  | 154.0 | 1006.8 | 0 |
| 18 | 10 | 8  | 2 | 1 | 1 | 1 | 30 | 20 | 25.0 | 200.0 | 112.5 | 87.5  | 1094.3 | 0 |
| 18 | 10 | 9  | 2 | 1 | 1 | 1 | 34 | 24 | 29.0 | 232.0 | 144.5 | 87.5  | 1181.8 | 0 |
| 18 | 10 | 10 | 2 | 0 | 1 | 0 | 28 | 30 | 0.0  | 196.0 | 98.0  | 98.0  | 1279.8 | 0 |
| 18 | 10 | 11 | 2 | 0 | 1 | 0 | 28 | 30 | 0.0  | 196.0 | 98.0  | 98.0  | 1377.8 | 0 |
| 18 | 10 | 12 | 2 | 1 | 1 | 1 | 35 | 30 | 32.5 | 260.0 | 153.1 | 106.9 | 1484.6 | 0 |
| 18 | 10 | 13 | 2 | 1 | 1 | 1 | 35 | 35 | 35.0 | 280.0 | 153.1 | 126.9 | 1611.5 | 0 |
| 18 | 10 | 14 | 2 | 1 | 1 | 1 | 34 | 35 | 34.5 | 276.0 | 144.5 | 131.5 | 1743.0 | 0 |
| 18 | 10 | 15 | 2 | 1 | 1 | 1 | 33 | 35 | 34.0 | 272.0 | 136.1 | 135.9 | 1878.9 | 0 |
| 18 | 10 | 16 | 2 | 1 | 1 | 1 | 32 | 20 | 26.0 | 208.0 | 128.0 | 80.0  | 1958.9 | 0 |
| 18 | 10 | 17 | 2 | 1 | 0 | 0 | 32 | 35 | 0.0  | 224.0 | 128.0 | 96.0  | 2054.9 | 0 |
| 18 | 10 | 18 | 2 | 1 | 0 | 0 | 28 | 35 | 0.0  | 196.0 | 98.0  | 98.0  | 2152.9 | 0 |
| 18 | 10 | 19 | 2 | 1 | 1 | 1 | 31 | 32 | 31.5 | 252.0 | 120.1 | 131.9 | 2284.8 | 0 |
| 18 | 10 | 20 | 2 | 1 | 1 | 1 | 38 | 31 | 34.5 | 276.0 | 180.5 | 95.5  | 2380.3 | 0 |
| 18 | 10 | 21 | 2 | 1 | 1 | 1 | 32 | 31 | 31.5 | 252.0 | 128.0 | 124.0 | 2504.3 | 0 |
| 18 | 10 | 22 | 2 | 1 | 1 | 1 | 30 | 31 | 30.5 | 244.0 | 112.5 | 131.5 | 2635.8 | 0 |
| 18 | 10 | 23 | 2 | 1 | 1 | 1 | 28 | 30 | 29.0 | 232.0 | 98.0  | 134.0 | 2769.8 | 0 |
| 18 | 10 | 24 | 2 | 1 | 1 | 1 | 26 | 29 | 27.5 | 220.0 | 84.5  | 135.5 | 2905.3 | 0 |
| 18 | 10 | 25 | 2 | 1 | 1 | 1 | 24 | 20 | 22.0 | 176.0 | 72.0  | 104.0 | 3009.3 | 0 |
| 18 | 10 | 26 | 2 | 1 | 0 | 0 | 28 | 35 | 0.0  | 196.0 | 98.0  | 98.0  | 3107.3 | 0 |

|    |    |    |   |   |   |   |    |    |      |       |       |       |        |   |
|----|----|----|---|---|---|---|----|----|------|-------|-------|-------|--------|---|
| 18 | 10 | 27 | 2 | 1 | 1 | 1 | 24 | 25 | 24.5 | 196.0 | 72.0  | 124.0 | 3231.3 | 0 |
| 18 | 10 | 28 | 2 | 1 | 1 | 1 | 25 | 25 | 25.0 | 200.0 | 78.1  | 121.9 | 3353.1 | 0 |
| 18 | 10 | 29 | 2 | 1 | 1 | 1 | 23 | 15 | 19.0 | 152.0 | 66.1  | 85.9  | 3439.0 | 0 |
| 18 | 10 | 30 | 2 | 1 | 0 | 0 | 28 | 35 | 0.0  | 196.0 | 98.0  | 98.0  | 3537.0 | 0 |
| 23 | 10 | 1  | 2 | 0 | 0 | 0 | 17 | 28 | 0.0  | 119.0 | 28.9  | 90.1  | 90.1   | 1 |
| 23 | 10 | 2  | 2 | 0 | 0 | 0 | 35 | 28 | 0.0  | 245.0 | 122.5 | 122.5 | 212.6  | 1 |
| 23 | 10 | 3  | 2 | 1 | 1 | 1 | 35 | 28 | 31.5 | 252.0 | 122.5 | 129.5 | 342.1  | 1 |
| 23 | 10 | 4  | 2 | 1 | 1 | 1 | 40 | 28 | 34.0 | 272.0 | 160.0 | 112.0 | 454.1  | 1 |
| 23 | 10 | 5  | 2 | 1 | 1 | 1 | 45 | 35 | 40.0 | 320.0 | 202.5 | 117.5 | 571.6  | 1 |
| 23 | 10 | 6  | 2 | 1 | 1 | 1 | 35 | 25 | 30.0 | 240.0 | 122.5 | 117.5 | 689.1  | 1 |
| 23 | 10 | 7  | 2 | 1 | 1 | 1 | 35 | 28 | 31.5 | 252.0 | 122.5 | 129.5 | 818.6  | 1 |
| 23 | 10 | 8  | 2 | 1 | 1 | 1 | 20 | 30 | 25.0 | 200.0 | 40.0  | 160.0 | 978.6  | 1 |
| 23 | 10 | 9  | 2 | 1 | 1 | 1 | 24 | 34 | 29.0 | 232.0 | 57.6  | 174.4 | 1153.0 | 1 |
| 23 | 10 | 10 | 2 | 1 | 0 | 0 | 30 | 28 | 0.0  | 210.0 | 90.0  | 120.0 | 1273.0 | 1 |
| 23 | 10 | 11 | 2 | 1 | 0 | 0 | 30 | 28 | 0.0  | 210.0 | 90.0  | 120.0 | 1393.0 | 1 |
| 23 | 10 | 12 | 2 | 1 | 1 | 1 | 30 | 35 | 32.5 | 260.0 | 90.0  | 170.0 | 1563.0 | 1 |
| 23 | 10 | 13 | 2 | 1 | 1 | 1 | 35 | 35 | 35.0 | 280.0 | 122.5 | 157.5 | 1720.5 | 1 |
| 23 | 10 | 14 | 2 | 1 | 1 | 1 | 35 | 34 | 34.5 | 276.0 | 122.5 | 153.5 | 1874.0 | 1 |
| 23 | 10 | 15 | 2 | 1 | 1 | 1 | 35 | 33 | 34.0 | 272.0 | 122.5 | 149.5 | 2023.5 | 1 |
| 23 | 10 | 16 | 2 | 1 | 1 | 1 | 20 | 32 | 26.0 | 208.0 | 40.0  | 168.0 | 2191.5 | 1 |
| 23 | 10 | 17 | 2 | 0 | 1 | 0 | 35 | 32 | 0.0  | 245.0 | 122.5 | 122.5 | 2314.0 | 1 |
| 23 | 10 | 18 | 2 | 0 | 1 | 0 | 35 | 28 | 0.0  | 245.0 | 122.5 | 122.5 | 2436.5 | 1 |
| 23 | 10 | 19 | 2 | 1 | 1 | 1 | 32 | 31 | 31.5 | 252.0 | 102.4 | 149.6 | 2586.1 | 1 |
| 23 | 10 | 20 | 2 | 1 | 1 | 1 | 31 | 38 | 34.5 | 276.0 | 96.1  | 179.9 | 2766.0 | 1 |
| 23 | 10 | 21 | 2 | 1 | 1 | 1 | 31 | 32 | 31.5 | 252.0 | 96.1  | 155.9 | 2921.9 | 1 |
| 23 | 10 | 22 | 2 | 1 | 1 | 1 | 31 | 30 | 30.5 | 244.0 | 96.1  | 147.9 | 3069.8 | 1 |
| 23 | 10 | 23 | 2 | 1 | 1 | 1 | 30 | 28 | 29.0 | 232.0 | 90.0  | 142.0 | 3211.8 | 1 |
| 23 | 10 | 24 | 2 | 1 | 1 | 1 | 29 | 26 | 27.5 | 220.0 | 84.1  | 135.9 | 3347.7 | 1 |
| 23 | 10 | 25 | 2 | 1 | 1 | 1 | 20 | 24 | 22.0 | 176.0 | 40.0  | 136.0 | 3483.7 | 1 |
| 23 | 10 | 26 | 2 | 0 | 1 | 0 | 35 | 28 | 0.0  | 245.0 | 122.5 | 122.5 | 3606.2 | 1 |
| 23 | 10 | 27 | 2 | 1 | 1 | 1 | 25 | 24 | 24.5 | 196.0 | 62.5  | 133.5 | 3739.7 | 1 |
| 23 | 10 | 28 | 2 | 1 | 1 | 1 | 25 | 25 | 25.0 | 200.0 | 62.5  | 137.5 | 3877.2 | 1 |
| 23 | 10 | 29 | 2 | 1 | 1 | 1 | 15 | 23 | 19.0 | 152.0 | 22.5  | 129.5 | 4006.7 | 1 |
| 23 | 10 | 30 | 2 | 0 | 1 | 0 | 35 | 28 | 0.0  | 245.0 | 122.5 | 122.5 | 4129.2 | 1 |
| 19 | 11 | 1  | 2 | 1 | 1 | 1 | 35 | 80 | 57.5 | 460.0 | 122.5 | 337.5 | 337.5  | 1 |
| 19 | 11 | 2  | 2 | 1 | 1 | 1 | 50 | 50 | 50.0 | 400.0 | 250.0 | 150.0 | 487.5  | 1 |
| 19 | 11 | 3  | 2 | 1 | 1 | 1 | 35 | 20 | 27.5 | 220.0 | 122.5 | 97.5  | 585.0  | 1 |
| 19 | 11 | 4  | 2 | 1 | 1 | 1 | 35 | 1  | 18.0 | 144.0 | 122.5 | 21.5  | 606.5  | 1 |

|    |    |    |   |   |   |   |    |    |      |       |       |        |        |   |
|----|----|----|---|---|---|---|----|----|------|-------|-------|--------|--------|---|
| 19 | 11 | 5  | 2 | 1 | 1 | 1 | 35 | 20 | 27.5 | 220.0 | 122.5 | 97.5   | 704.0  | 1 |
| 19 | 11 | 6  | 2 | 1 | 1 | 1 | 35 | 28 | 31.5 | 252.0 | 122.5 | 129.5  | 833.5  | 1 |
| 19 | 11 | 7  | 2 | 1 | 1 | 1 | 35 | 28 | 31.5 | 252.0 | 122.5 | 129.5  | 963.0  | 1 |
| 19 | 11 | 8  | 2 | 1 | 1 | 1 | 57 | 50 | 53.5 | 428.0 | 324.9 | 103.1  | 1066.1 | 1 |
| 19 | 11 | 9  | 2 | 1 | 1 | 1 | 35 | 20 | 27.5 | 220.0 | 122.5 | 97.5   | 1163.6 | 1 |
| 19 | 11 | 10 | 2 | 1 | 1 | 1 | 42 | 20 | 31.0 | 248.0 | 176.4 | 71.6   | 1235.2 | 1 |
| 19 | 11 | 11 | 2 | 1 | 1 | 1 | 35 | 20 | 27.5 | 220.0 | 122.5 | 97.5   | 1332.7 | 1 |
| 19 | 11 | 12 | 2 | 1 | 1 | 1 | 42 | 35 | 38.5 | 308.0 | 176.4 | 131.6  | 1464.3 | 1 |
| 19 | 11 | 13 | 2 | 1 | 1 | 1 | 40 | 20 | 30.0 | 240.0 | 160.0 | 80.0   | 1544.3 | 1 |
| 19 | 11 | 14 | 2 | 0 | 1 | 0 | 35 | 20 | 0.0  | 245.0 | 122.5 | 122.5  | 1666.8 | 1 |
| 19 | 11 | 15 | 2 | 0 | 1 | 0 | 35 | 50 | 0.0  | 245.0 | 122.5 | 122.5  | 1789.3 | 1 |
| 19 | 11 | 16 | 2 | 0 | 1 | 0 | 35 | 0  | 0.0  | 245.0 | 122.5 | 122.5  | 1911.8 | 1 |
| 19 | 11 | 17 | 2 | 0 | 1 | 0 | 36 | 35 | 0.0  | 252.0 | 129.6 | 122.4  | 2034.2 | 1 |
| 19 | 11 | 18 | 2 | 0 | 1 | 0 | 34 | 28 | 0.0  | 238.0 | 115.6 | 122.4  | 2156.6 | 1 |
| 19 | 11 | 19 | 2 | 0 | 1 | 0 | 35 | 28 | 0.0  | 245.0 | 122.5 | 122.5  | 2279.1 | 1 |
| 19 | 11 | 20 | 2 | 0 | 1 | 0 | 35 | 70 | 0.0  | 245.0 | 122.5 | 122.5  | 2401.6 | 1 |
| 19 | 11 | 21 | 2 | 0 | 0 | 0 | 35 | 28 | 0.0  | 245.0 | 122.5 | 122.5  | 2524.1 | 1 |
| 19 | 11 | 22 | 2 | 0 | 1 | 0 | 35 | 0  | 0.0  | 245.0 | 122.5 | 122.5  | 2646.6 | 1 |
| 19 | 11 | 23 | 2 | 0 | 1 | 0 | 35 | 28 | 0.0  | 245.0 | 122.5 | 122.5  | 2769.1 | 1 |
| 19 | 11 | 24 | 2 | 0 | 1 | 0 | 35 | 30 | 0.0  | 245.0 | 122.5 | 122.5  | 2891.6 | 1 |
| 19 | 11 | 25 | 2 | 0 | 1 | 0 | 35 | 28 | 0.0  | 245.0 | 122.5 | 122.5  | 3014.1 | 1 |
| 19 | 11 | 26 | 2 | 0 | 1 | 0 | 35 | 28 | 0.0  | 245.0 | 122.5 | 122.5  | 3136.6 | 1 |
| 19 | 11 | 27 | 2 | 0 | 1 | 0 | 35 | 28 | 0.0  | 245.0 | 122.5 | 122.5  | 3259.1 | 1 |
| 19 | 11 | 28 | 2 | 0 | 1 | 0 | 35 | 28 | 0.0  | 245.0 | 122.5 | 122.5  | 3381.6 | 1 |
| 19 | 11 | 29 | 2 | 0 | 1 | 0 | 35 | 28 | 0.0  | 245.0 | 122.5 | 122.5  | 3504.1 | 1 |
| 19 | 11 | 30 | 2 | 0 | 1 | 0 | 35 | 29 | 0.0  | 245.0 | 122.5 | 122.5  | 3626.6 | 1 |
| 22 | 11 | 1  | 2 | 1 | 1 | 1 | 80 | 35 | 57.5 | 460.0 | 800.0 | -340.0 | -340.0 | 0 |
| 22 | 11 | 2  | 2 | 1 | 1 | 1 | 50 | 50 | 50.0 | 400.0 | 312.5 | 87.5   | -252.5 | 0 |
| 22 | 11 | 3  | 2 | 1 | 1 | 1 | 20 | 35 | 27.5 | 220.0 | 50.0  | 170.0  | -82.5  | 0 |
| 22 | 11 | 4  | 2 | 1 | 1 | 1 | 1  | 35 | 18.0 | 144.0 | 0.1   | 143.9  | 61.4   | 0 |
| 22 | 11 | 5  | 2 | 1 | 1 | 1 | 20 | 35 | 27.5 | 220.0 | 50.0  | 170.0  | 231.4  | 0 |
| 22 | 11 | 6  | 2 | 1 | 1 | 1 | 28 | 35 | 31.5 | 252.0 | 98.0  | 154.0  | 385.4  | 0 |
| 22 | 11 | 7  | 2 | 1 | 1 | 1 | 28 | 35 | 31.5 | 252.0 | 98.0  | 154.0  | 539.4  | 0 |
| 22 | 11 | 8  | 2 | 1 | 1 | 1 | 50 | 57 | 53.5 | 428.0 | 312.5 | 115.5  | 654.9  | 0 |
| 22 | 11 | 9  | 2 | 1 | 1 | 1 | 20 | 35 | 27.5 | 220.0 | 50.0  | 170.0  | 824.9  | 0 |
| 22 | 11 | 10 | 2 | 1 | 1 | 1 | 20 | 42 | 31.0 | 248.0 | 50.0  | 198.0  | 1022.9 | 0 |
| 22 | 11 | 11 | 2 | 1 | 1 | 1 | 20 | 35 | 27.5 | 220.0 | 50.0  | 170.0  | 1192.9 | 0 |
| 22 | 11 | 12 | 2 | 1 | 1 | 1 | 35 | 42 | 38.5 | 308.0 | 153.1 | 154.9  | 1347.8 | 0 |

|    |    |    |   |   |   |   |    |    |      |       |       |        |        |   |
|----|----|----|---|---|---|---|----|----|------|-------|-------|--------|--------|---|
| 22 | 11 | 13 | 2 | 1 | 1 | 1 | 20 | 40 | 30.0 | 240.0 | 50.0  | 190.0  | 1537.8 | 0 |
| 22 | 11 | 14 | 2 | 1 | 0 | 0 | 20 | 35 | 0.0  | 140.0 | 50.0  | 90.0   | 1627.8 | 0 |
| 22 | 11 | 15 | 2 | 1 | 0 | 0 | 50 | 35 | 0.0  | 350.0 | 312.5 | 37.5   | 1665.3 | 0 |
| 22 | 11 | 16 | 2 | 1 | 0 | 0 | 0  | 35 | 0.0  | 0.0   | 0.0   | 0.0    | 1665.3 | 0 |
| 22 | 11 | 17 | 2 | 1 | 0 | 0 | 35 | 36 | 0.0  | 245.0 | 153.1 | 91.9   | 1757.1 | 0 |
| 22 | 11 | 18 | 2 | 1 | 0 | 0 | 28 | 34 | 0.0  | 196.0 | 98.0  | 98.0   | 1855.1 | 0 |
| 22 | 11 | 19 | 2 | 1 | 0 | 0 | 28 | 35 | 0.0  | 196.0 | 98.0  | 98.0   | 1953.1 | 0 |
| 22 | 11 | 20 | 2 | 1 | 0 | 0 | 70 | 35 | 0.0  | 490.0 | 612.5 | -122.5 | 1830.6 | 0 |
| 22 | 11 | 21 | 2 | 0 | 0 | 0 | 28 | 35 | 0.0  | 196.0 | 98.0  | 98.0   | 1928.6 | 0 |
| 22 | 11 | 22 | 2 | 1 | 0 | 0 | 0  | 35 | 0.0  | 0.0   | 0.0   | 0.0    | 1928.6 | 0 |
| 22 | 11 | 23 | 2 | 1 | 0 | 0 | 28 | 35 | 0.0  | 196.0 | 98.0  | 98.0   | 2026.6 | 0 |
| 22 | 11 | 24 | 2 | 1 | 0 | 0 | 30 | 35 | 0.0  | 210.0 | 112.5 | 97.5   | 2124.1 | 0 |
| 22 | 11 | 25 | 2 | 1 | 0 | 0 | 28 | 35 | 0.0  | 196.0 | 98.0  | 98.0   | 2222.1 | 0 |
| 22 | 11 | 26 | 2 | 1 | 0 | 0 | 28 | 35 | 0.0  | 196.0 | 98.0  | 98.0   | 2320.1 | 0 |
| 22 | 11 | 27 | 2 | 1 | 0 | 0 | 28 | 35 | 0.0  | 196.0 | 98.0  | 98.0   | 2418.1 | 0 |
| 22 | 11 | 28 | 2 | 1 | 0 | 0 | 28 | 35 | 0.0  | 196.0 | 98.0  | 98.0   | 2516.1 | 0 |
| 22 | 11 | 29 | 2 | 1 | 0 | 0 | 28 | 35 | 0.0  | 196.0 | 98.0  | 98.0   | 2614.1 | 0 |
| 22 | 11 | 30 | 2 | 1 | 0 | 0 | 29 | 35 | 0.0  | 203.0 | 105.1 | 97.9   | 2712.0 | 0 |
| 20 | 12 | 1  | 2 | 1 | 1 | 1 | 28 | 60 | 44.0 | 352.0 | 98.0  | 254.0  | 254.0  | 0 |
| 20 | 12 | 2  | 2 | 1 | 1 | 1 | 28 | 58 | 43.0 | 344.0 | 98.0  | 246.0  | 500.0  | 0 |
| 20 | 12 | 3  | 2 | 1 | 0 | 0 | 28 | 65 | 0.0  | 196.0 | 98.0  | 98.0   | 598.0  | 0 |
| 20 | 12 | 4  | 2 | 1 | 0 | 0 | 28 | 67 | 0.0  | 196.0 | 98.0  | 98.0   | 696.0  | 0 |
| 20 | 12 | 5  | 2 | 1 | 0 | 0 | 28 | 52 | 0.0  | 196.0 | 98.0  | 98.0   | 794.0  | 0 |
| 20 | 12 | 6  | 2 | 1 | 0 | 0 | 28 | 8  | 0.0  | 196.0 | 98.0  | 98.0   | 892.0  | 0 |
| 20 | 12 | 7  | 2 | 1 | 0 | 0 | 28 | 4  | 0.0  | 196.0 | 98.0  | 98.0   | 990.0  | 0 |
| 20 | 12 | 8  | 2 | 1 | 0 | 0 | 29 | 51 | 0.0  | 203.0 | 105.1 | 97.9   | 1087.9 | 0 |
| 20 | 12 | 9  | 2 | 1 | 0 | 0 | 28 | 52 | 0.0  | 196.0 | 98.0  | 98.0   | 1185.9 | 0 |
| 20 | 12 | 10 | 2 | 1 | 0 | 0 | 28 | 51 | 0.0  | 196.0 | 98.0  | 98.0   | 1283.9 | 0 |
| 20 | 12 | 11 | 2 | 1 | 0 | 0 | 28 | 51 | 0.0  | 196.0 | 98.0  | 98.0   | 1381.9 | 0 |
| 20 | 12 | 12 | 2 | 1 | 0 | 0 | 28 | 55 | 0.0  | 196.0 | 98.0  | 98.0   | 1479.9 | 0 |
| 20 | 12 | 13 | 2 | 1 | 0 | 0 | 28 | 51 | 0.0  | 196.0 | 98.0  | 98.0   | 1577.9 | 0 |
| 20 | 12 | 14 | 2 | 1 | 0 | 0 | 28 | 51 | 0.0  | 196.0 | 98.0  | 98.0   | 1675.9 | 0 |
| 20 | 12 | 15 | 2 | 1 | 0 | 0 | 28 | 51 | 0.0  | 196.0 | 98.0  | 98.0   | 1773.9 | 0 |
| 20 | 12 | 16 | 2 | 1 | 0 | 0 | 28 | 51 | 0.0  | 196.0 | 98.0  | 98.0   | 1871.9 | 0 |
| 20 | 12 | 17 | 2 | 1 | 0 | 0 | 28 | 51 | 0.0  | 196.0 | 98.0  | 98.0   | 1969.9 | 0 |
| 20 | 12 | 18 | 2 | 1 | 0 | 0 | 28 | 52 | 0.0  | 196.0 | 98.0  | 98.0   | 2067.9 | 0 |
| 20 | 12 | 19 | 2 | 1 | 0 | 0 | 28 | 51 | 0.0  | 196.0 | 98.0  | 98.0   | 2165.9 | 0 |
| 20 | 12 | 20 | 2 | 1 | 0 | 0 | 28 | 51 | 0.0  | 196.0 | 98.0  | 98.0   | 2263.9 | 0 |



|    |    |    |   |   |   |   |    |    |      |       |       |      |        |   |
|----|----|----|---|---|---|---|----|----|------|-------|-------|------|--------|---|
| 20 | 12 | 21 | 2 | 1 | 0 | 0 | 28 | 51 | 0.0  | 196.0 | 98.0  | 98.0 | 2361.9 | 0 |
| 20 | 12 | 22 | 2 | 1 | 0 | 0 | 28 | 51 | 0.0  | 196.0 | 98.0  | 98.0 | 2459.9 | 0 |
| 20 | 12 | 23 | 2 | 1 | 0 | 0 | 28 | 51 | 0.0  | 196.0 | 98.0  | 98.0 | 2557.9 | 0 |
| 20 | 12 | 24 | 2 | 1 | 0 | 0 | 28 | 51 | 0.0  | 196.0 | 98.0  | 98.0 | 2655.9 | 0 |
| 20 | 12 | 25 | 2 | 1 | 0 | 0 | 28 | 51 | 0.0  | 196.0 | 98.0  | 98.0 | 2753.9 | 0 |
| 20 | 12 | 26 | 2 | 1 | 0 | 0 | 28 | 51 | 0.0  | 196.0 | 98.0  | 98.0 | 2851.9 | 0 |
| 20 | 12 | 27 | 2 | 1 | 0 | 0 | 28 | 51 | 0.0  | 196.0 | 98.0  | 98.0 | 2949.9 | 0 |
| 20 | 12 | 28 | 2 | 1 | 0 | 0 | 28 | 51 | 0.0  | 196.0 | 98.0  | 98.0 | 3047.9 | 0 |
| 20 | 12 | 29 | 2 | 1 | 0 | 0 | 28 | 51 | 0.0  | 196.0 | 98.0  | 98.0 | 3145.9 | 0 |
| 20 | 12 | 30 | 2 | 1 | 0 | 0 | 28 | 51 | 0.0  | 196.0 | 98.0  | 98.0 | 3243.9 | 0 |
| 21 | 12 | 1  | 2 | 1 | 1 | 1 | 60 | 28 | 44.0 | 352.0 | 360.0 | -8.0 | -8.0   | 1 |
| 21 | 12 | 2  | 2 | 1 | 1 | 1 | 58 | 28 | 43.0 | 344.0 | 336.4 | 7.6  | -0.4   | 1 |
| 21 | 12 | 3  | 2 | 0 | 1 | 0 | 65 | 28 | 0.0  | 455.0 | 422.5 | 32.5 | 32.1   | 1 |
| 21 | 12 | 4  | 2 | 0 | 1 | 0 | 67 | 28 | 0.0  | 469.0 | 448.9 | 20.1 | 52.2   | 1 |
| 21 | 12 | 5  | 2 | 0 | 1 | 0 | 52 | 28 | 0.0  | 364.0 | 270.4 | 93.6 | 145.8  | 1 |
| 21 | 12 | 6  | 2 | 0 | 1 | 0 | 8  | 28 | 0.0  | 56.0  | 6.4   | 49.6 | 195.4  | 1 |
| 21 | 12 | 7  | 2 | 0 | 1 | 0 | 4  | 28 | 0.0  | 28.0  | 1.6   | 26.4 | 221.8  | 1 |
| 21 | 12 | 8  | 2 | 0 | 1 | 0 | 51 | 29 | 0.0  | 357.0 | 260.1 | 96.9 | 318.7  | 1 |
| 21 | 12 | 9  | 2 | 0 | 1 | 0 | 52 | 28 | 0.0  | 364.0 | 270.4 | 93.6 | 412.3  | 1 |
| 21 | 12 | 10 | 2 | 0 | 1 | 0 | 51 | 28 | 0.0  | 357.0 | 260.1 | 96.9 | 509.2  | 1 |
| 21 | 12 | 11 | 2 | 0 | 1 | 0 | 51 | 28 | 0.0  | 357.0 | 260.1 | 96.9 | 606.1  | 1 |
| 21 | 12 | 12 | 2 | 0 | 1 | 0 | 55 | 28 | 0.0  | 385.0 | 302.5 | 82.5 | 688.6  | 1 |
| 21 | 12 | 13 | 2 | 0 | 1 | 0 | 51 | 28 | 0.0  | 357.0 | 260.1 | 96.9 | 785.5  | 1 |
| 21 | 12 | 14 | 2 | 0 | 1 | 0 | 51 | 28 | 0.0  | 357.0 | 260.1 | 96.9 | 882.4  | 1 |
| 21 | 12 | 15 | 2 | 0 | 1 | 0 | 51 | 28 | 0.0  | 357.0 | 260.1 | 96.9 | 979.3  | 1 |
| 21 | 12 | 16 | 2 | 0 | 1 | 0 | 51 | 28 | 0.0  | 357.0 | 260.1 | 96.9 | 1076.2 | 1 |
| 21 | 12 | 17 | 2 | 0 | 1 | 0 | 51 | 28 | 0.0  | 357.0 | 260.1 | 96.9 | 1173.1 | 1 |
| 21 | 12 | 18 | 2 | 0 | 1 | 0 | 52 | 28 | 0.0  | 364.0 | 270.4 | 93.6 | 1266.7 | 1 |
| 21 | 12 | 19 | 2 | 0 | 1 | 0 | 51 | 28 | 0.0  | 357.0 | 260.1 | 96.9 | 1363.6 | 1 |
| 21 | 12 | 20 | 2 | 0 | 1 | 0 | 51 | 28 | 0.0  | 357.0 | 260.1 | 96.9 | 1460.5 | 1 |
| 21 | 12 | 21 | 2 | 0 | 1 | 0 | 51 | 28 | 0.0  | 357.0 | 260.1 | 96.9 | 1557.4 | 1 |
| 21 | 12 | 22 | 2 | 0 | 1 | 0 | 51 | 28 | 0.0  | 357.0 | 260.1 | 96.9 | 1654.3 | 1 |
| 21 | 12 | 23 | 2 | 0 | 1 | 0 | 51 | 28 | 0.0  | 357.0 | 260.1 | 96.9 | 1751.2 | 1 |
| 21 | 12 | 24 | 2 | 0 | 1 | 0 | 51 | 28 | 0.0  | 357.0 | 260.1 | 96.9 | 1848.1 | 1 |
| 21 | 12 | 25 | 2 | 0 | 1 | 0 | 51 | 28 | 0.0  | 357.0 | 260.1 | 96.9 | 1945.0 | 1 |
| 21 | 12 | 26 | 2 | 0 | 1 | 0 | 51 | 28 | 0.0  | 357.0 | 260.1 | 96.9 | 2041.9 | 1 |
| 21 | 12 | 27 | 2 | 0 | 1 | 0 | 51 | 28 | 0.0  | 357.0 | 260.1 | 96.9 | 2138.8 | 1 |
| 21 | 12 | 28 | 2 | 0 | 1 | 0 | 51 | 28 | 0.0  | 357.0 | 260.1 | 96.9 | 2235.7 | 1 |

|    |    |    |   |   |   |   |    |    |      |       |       |       |        |   |
|----|----|----|---|---|---|---|----|----|------|-------|-------|-------|--------|---|
| 21 | 12 | 29 | 2 | 0 | 1 | 0 | 51 | 28 | 0.0  | 357.0 | 260.1 | 96.9  | 2332.6 | 1 |
| 21 | 12 | 30 | 2 | 0 | 1 | 0 | 51 | 28 | 0.0  | 357.0 | 260.1 | 96.9  | 2429.5 | 1 |
| 25 | 13 | 1  | 2 | 0 | 1 | 0 | 53 | 28 | 0.0  | 371.0 | 280.9 | 90.1  | 90.1   | 1 |
| 25 | 13 | 2  | 2 | 0 | 1 | 0 | 36 | 28 | 0.0  | 252.0 | 129.6 | 122.4 | 212.5  | 1 |
| 25 | 13 | 3  | 2 | 0 | 0 | 0 | 36 | 28 | 0.0  | 252.0 | 129.6 | 122.4 | 334.9  | 1 |
| 25 | 13 | 4  | 2 | 0 | 0 | 0 | 50 | 28 | 0.0  | 350.0 | 250.0 | 100.0 | 434.9  | 1 |
| 25 | 13 | 5  | 2 | 0 | 0 | 0 | 46 | 28 | 0.0  | 322.0 | 211.6 | 110.4 | 545.3  | 1 |
| 25 | 13 | 6  | 2 | 1 | 0 | 0 | 33 | 28 | 0.0  | 231.0 | 108.9 | 122.1 | 667.4  | 1 |
| 25 | 13 | 7  | 2 | 1 | 0 | 0 | 31 | 28 | 0.0  | 217.0 | 96.1  | 120.9 | 788.3  | 1 |
| 25 | 13 | 8  | 2 | 1 | 0 | 0 | 32 | 28 | 0.0  | 224.0 | 102.4 | 121.6 | 909.9  | 1 |
| 25 | 13 | 9  | 2 | 1 | 0 | 0 | 30 | 28 | 0.0  | 210.0 | 90.0  | 120.0 | 1029.9 | 1 |
| 25 | 13 | 10 | 2 | 1 | 0 | 0 | 29 | 28 | 0.0  | 203.0 | 84.1  | 118.9 | 1148.8 | 1 |
| 25 | 13 | 11 | 2 | 0 | 0 | 0 | 33 | 28 | 0.0  | 231.0 | 108.9 | 122.1 | 1270.9 | 1 |
| 25 | 13 | 12 | 2 | 0 | 1 | 0 | 30 | 28 | 0.0  | 210.0 | 90.0  | 120.0 | 1390.9 | 1 |
| 25 | 13 | 13 | 2 | 1 | 1 | 1 | 50 | 13 | 31.5 | 252.0 | 250.0 | 2.0   | 1392.9 | 1 |
| 25 | 13 | 14 | 2 | 1 | 1 | 1 | 50 | 12 | 31.0 | 248.0 | 250.0 | -2.0  | 1390.9 | 1 |
| 25 | 13 | 15 | 2 | 0 | 1 | 0 | 33 | 28 | 0.0  | 231.0 | 108.9 | 122.1 | 1513.0 | 1 |
| 25 | 13 | 16 | 2 | 0 | 1 | 0 | 32 | 28 | 0.0  | 224.0 | 102.4 | 121.6 | 1634.6 | 1 |
| 25 | 13 | 17 | 2 | 0 | 1 | 0 | 35 | 28 | 0.0  | 245.0 | 122.5 | 122.5 | 1757.1 | 1 |
| 25 | 13 | 18 | 2 | 0 | 1 | 0 | 35 | 28 | 0.0  | 245.0 | 122.5 | 122.5 | 1879.6 | 1 |
| 25 | 13 | 19 | 2 | 0 | 1 | 0 | 35 | 28 | 0.0  | 245.0 | 122.5 | 122.5 | 2002.1 | 1 |
| 25 | 13 | 20 | 2 | 0 | 1 | 0 | 35 | 28 | 0.0  | 245.0 | 122.5 | 122.5 | 2124.6 | 1 |
| 25 | 13 | 21 | 2 | 0 | 1 | 0 | 35 | 28 | 0.0  | 245.0 | 122.5 | 122.5 | 2247.1 | 1 |
| 25 | 13 | 22 | 2 | 0 | 1 | 0 | 36 | 28 | 0.0  | 252.0 | 129.6 | 122.4 | 2369.5 | 1 |
| 25 | 13 | 23 | 2 | 0 | 1 | 0 | 34 | 28 | 0.0  | 238.0 | 115.6 | 122.4 | 2491.9 | 1 |
| 25 | 13 | 24 | 2 | 0 | 1 | 0 | 35 | 28 | 0.0  | 245.0 | 122.5 | 122.5 | 2614.4 | 1 |
| 25 | 13 | 25 | 2 | 0 | 1 | 0 | 35 | 28 | 0.0  | 245.0 | 122.5 | 122.5 | 2736.9 | 1 |
| 25 | 13 | 26 | 2 | 1 | 1 | 1 | 50 | 25 | 37.5 | 300.0 | 250.0 | 50.0  | 2786.9 | 1 |
| 25 | 13 | 27 | 2 | 1 | 1 | 1 | 50 | 28 | 39.0 | 312.0 | 250.0 | 62.0  | 2848.9 | 1 |
| 25 | 13 | 28 | 2 | 0 | 1 | 0 | 35 | 28 | 0.0  | 245.0 | 122.5 | 122.5 | 2971.4 | 1 |
| 25 | 13 | 29 | 2 | 1 | 1 | 1 | 50 | 45 | 47.5 | 380.0 | 250.0 | 130.0 | 3101.4 | 1 |
| 25 | 13 | 30 | 2 | 0 | 1 | 0 | 35 | 28 | 0.0  | 245.0 | 122.5 | 122.5 | 3223.9 | 1 |
| 32 | 13 | 1  | 2 | 1 | 0 | 0 | 28 | 53 | 0.0  | 196.0 | 98.0  | 98.0  | 98.0   | 0 |
| 32 | 13 | 2  | 2 | 1 | 0 | 0 | 28 | 36 | 0.0  | 196.0 | 98.0  | 98.0  | 196.0  | 0 |
| 32 | 13 | 3  | 2 | 0 | 0 | 0 | 28 | 36 | 0.0  | 196.0 | 98.0  | 98.0  | 294.0  | 0 |
| 32 | 13 | 4  | 2 | 0 | 0 | 0 | 28 | 50 | 0.0  | 196.0 | 98.0  | 98.0  | 392.0  | 0 |
| 32 | 13 | 5  | 2 | 0 | 0 | 0 | 28 | 46 | 0.0  | 196.0 | 98.0  | 98.0  | 490.0  | 0 |
| 32 | 13 | 6  | 2 | 0 | 1 | 0 | 28 | 33 | 0.0  | 196.0 | 98.0  | 98.0  | 588.0  | 0 |

|    |    |    |   |   |   |   |     |     |      |       |        |        |        |   |
|----|----|----|---|---|---|---|-----|-----|------|-------|--------|--------|--------|---|
| 32 | 13 | 7  | 2 | 0 | 1 | 0 | 28  | 31  | 0.0  | 196.0 | 98.0   | 98.0   | 686.0  | 0 |
| 32 | 13 | 8  | 2 | 0 | 1 | 0 | 28  | 32  | 0.0  | 196.0 | 98.0   | 98.0   | 784.0  | 0 |
| 32 | 13 | 9  | 2 | 0 | 1 | 0 | 28  | 30  | 0.0  | 196.0 | 98.0   | 98.0   | 882.0  | 0 |
| 32 | 13 | 10 | 2 | 0 | 1 | 0 | 28  | 29  | 0.0  | 196.0 | 98.0   | 98.0   | 980.0  | 0 |
| 32 | 13 | 11 | 2 | 0 | 0 | 0 | 28  | 33  | 0.0  | 196.0 | 98.0   | 98.0   | 1078.0 | 0 |
| 32 | 13 | 12 | 2 | 1 | 0 | 0 | 28  | 30  | 0.0  | 196.0 | 98.0   | 98.0   | 1176.0 | 0 |
| 32 | 13 | 13 | 2 | 1 | 1 | 1 | 13  | 50  | 31.5 | 252.0 | 21.1   | 230.9  | 1406.9 | 0 |
| 32 | 13 | 14 | 2 | 1 | 1 | 1 | 12  | 50  | 31.0 | 248.0 | 18.0   | 230.0  | 1636.9 | 0 |
| 32 | 13 | 15 | 2 | 1 | 0 | 0 | 28  | 33  | 0.0  | 196.0 | 98.0   | 98.0   | 1734.9 | 0 |
| 32 | 13 | 16 | 2 | 1 | 0 | 0 | 28  | 32  | 0.0  | 196.0 | 98.0   | 98.0   | 1832.9 | 0 |
| 32 | 13 | 17 | 2 | 1 | 0 | 0 | 28  | 35  | 0.0  | 196.0 | 98.0   | 98.0   | 1930.9 | 0 |
| 32 | 13 | 18 | 2 | 1 | 0 | 0 | 28  | 35  | 0.0  | 196.0 | 98.0   | 98.0   | 2028.9 | 0 |
| 32 | 13 | 19 | 2 | 1 | 0 | 0 | 28  | 35  | 0.0  | 196.0 | 98.0   | 98.0   | 2126.9 | 0 |
| 32 | 13 | 20 | 2 | 1 | 0 | 0 | 28  | 35  | 0.0  | 196.0 | 98.0   | 98.0   | 2224.9 | 0 |
| 32 | 13 | 21 | 2 | 1 | 0 | 0 | 28  | 35  | 0.0  | 196.0 | 98.0   | 98.0   | 2322.9 | 0 |
| 32 | 13 | 22 | 2 | 1 | 0 | 0 | 28  | 36  | 0.0  | 196.0 | 98.0   | 98.0   | 2420.9 | 0 |
| 32 | 13 | 23 | 2 | 1 | 0 | 0 | 28  | 34  | 0.0  | 196.0 | 98.0   | 98.0   | 2518.9 | 0 |
| 32 | 13 | 24 | 2 | 1 | 0 | 0 | 28  | 35  | 0.0  | 196.0 | 98.0   | 98.0   | 2616.9 | 0 |
| 32 | 13 | 25 | 2 | 1 | 0 | 0 | 28  | 35  | 0.0  | 196.0 | 98.0   | 98.0   | 2714.9 | 0 |
| 32 | 13 | 26 | 2 | 1 | 1 | 1 | 25  | 50  | 37.5 | 300.0 | 78.1   | 221.9  | 2936.8 | 0 |
| 32 | 13 | 27 | 2 | 1 | 1 | 1 | 28  | 50  | 39.0 | 312.0 | 98.0   | 214.0  | 3150.8 | 0 |
| 32 | 13 | 28 | 2 | 1 | 0 | 0 | 28  | 35  | 0.0  | 196.0 | 98.0   | 98.0   | 3248.8 | 0 |
| 32 | 13 | 29 | 2 | 1 | 1 | 1 | 45  | 50  | 47.5 | 380.0 | 253.1  | 126.9  | 3375.6 | 0 |
| 32 | 13 | 30 | 2 | 1 | 0 | 0 | 28  | 35  | 0.0  | 196.0 | 98.0   | 98.0   | 3473.6 | 0 |
| 26 | 14 | 1  | 2 | 1 | 0 | 0 | 28  | 90  | 0.0  | 196.0 | 98.0   | 98.0   | 98.0   | 0 |
| 26 | 14 | 2  | 2 | 1 | 1 | 1 | 1   | 100 | 50.5 | 404.0 | 0.1    | 403.9  | 501.9  | 0 |
| 26 | 14 | 3  | 2 | 1 | 0 | 0 | 28  | 100 | 0.0  | 196.0 | 98.0   | 98.0   | 599.9  | 0 |
| 26 | 14 | 4  | 2 | 1 | 1 | 1 | 1   | 33  | 17.0 | 136.0 | 0.1    | 135.9  | 735.8  | 0 |
| 26 | 14 | 5  | 2 | 1 | 1 | 1 | 1   | 35  | 18.0 | 144.0 | 0.1    | 143.9  | 879.6  | 0 |
| 26 | 14 | 6  | 2 | 1 | 0 | 0 | 28  | 35  | 0.0  | 196.0 | 98.0   | 98.0   | 977.6  | 0 |
| 26 | 14 | 7  | 2 | 1 | 1 | 1 | 1   | 60  | 30.5 | 244.0 | 0.1    | 243.9  | 1221.5 | 0 |
| 26 | 14 | 8  | 2 | 1 | 1 | 1 | 1   | 10  | 5.5  | 44.0  | 0.1    | 43.9   | 1265.4 | 0 |
| 26 | 14 | 9  | 2 | 1 | 0 | 0 | 50  | 35  | 0.0  | 350.0 | 312.5  | 37.5   | 1302.9 | 0 |
| 26 | 14 | 10 | 2 | 1 | 0 | 0 | 28  | 35  | 0.0  | 196.0 | 98.0   | 98.0   | 1400.9 | 0 |
| 26 | 14 | 11 | 2 | 0 | 0 | 0 | 28  | 33  | 0.0  | 196.0 | 98.0   | 98.0   | 1498.9 | 0 |
| 26 | 14 | 12 | 2 | 1 | 0 | 0 | 28  | 35  | 0.0  | 196.0 | 98.0   | 98.0   | 1596.9 | 0 |
| 26 | 14 | 13 | 2 | 1 | 1 | 1 | 100 | 30  | 65.0 | 520.0 | 1250.0 | -730.0 | 866.9  | 0 |
| 26 | 14 | 14 | 2 | 1 | 1 | 1 | 2   | 30  | 16.0 | 128.0 | 0.5    | 127.5  | 994.4  | 0 |

|    |    |    |   |   |   |   |     |     |      |       |        |        |         |   |
|----|----|----|---|---|---|---|-----|-----|------|-------|--------|--------|---------|---|
| 26 | 14 | 15 | 2 | 1 | 1 | 1 | 1   | 30  | 15.5 | 124.0 | 0.1    | 123.9  | 1118.3  | 0 |
| 26 | 14 | 16 | 2 | 1 | 1 | 1 | 1   | 35  | 18.0 | 144.0 | 0.1    | 143.9  | 1262.1  | 0 |
| 26 | 14 | 17 | 2 | 1 | 1 | 1 | 5   | 50  | 27.5 | 220.0 | 3.1    | 216.9  | 1479.0  | 0 |
| 26 | 14 | 18 | 2 | 1 | 1 | 1 | 1   | 25  | 13.0 | 104.0 | 0.1    | 103.9  | 1582.9  | 0 |
| 26 | 14 | 19 | 2 | 1 | 1 | 1 | 5   | 35  | 20.0 | 160.0 | 3.1    | 156.9  | 1739.8  | 0 |
| 26 | 14 | 20 | 2 | 1 | 1 | 1 | 40  | 40  | 40.0 | 320.0 | 200.0  | 120.0  | 1859.8  | 0 |
| 26 | 14 | 21 | 2 | 1 | 1 | 1 | 1   | 45  | 23.0 | 184.0 | 0.1    | 183.9  | 2043.6  | 0 |
| 26 | 14 | 22 | 2 | 1 | 1 | 1 | 1   | 35  | 18.0 | 144.0 | 0.1    | 143.9  | 2187.5  | 0 |
| 26 | 14 | 23 | 2 | 0 | 1 | 0 | 28  | 25  | 0.0  | 196.0 | 98.0   | 98.0   | 2285.5  | 0 |
| 26 | 14 | 24 | 2 | 1 | 0 | 0 | 28  | 35  | 0.0  | 196.0 | 98.0   | 98.0   | 2383.5  | 0 |
| 26 | 14 | 25 | 2 | 1 | 1 | 1 | 1   | 35  | 18.0 | 144.0 | 0.1    | 143.9  | 2527.4  | 0 |
| 26 | 14 | 26 | 2 | 1 | 0 | 0 | 28  | 35  | 0.0  | 196.0 | 98.0   | 98.0   | 2625.4  | 0 |
| 26 | 14 | 27 | 2 | 1 | 0 | 0 | 28  | 35  | 0.0  | 196.0 | 98.0   | 98.0   | 2723.4  | 0 |
| 26 | 14 | 28 | 2 | 1 | 0 | 0 | 28  | 36  | 0.0  | 196.0 | 98.0   | 98.0   | 2821.4  | 0 |
| 26 | 14 | 29 | 2 | 1 | 1 | 1 | 15  | 40  | 27.5 | 220.0 | 28.1   | 191.9  | 3013.3  | 0 |
| 26 | 14 | 30 | 2 | 1 | 0 | 0 | 28  | 35  | 0.0  | 196.0 | 98.0   | 98.0   | 3111.3  | 0 |
| 31 | 14 | 1  | 2 | 0 | 1 | 0 | 90  | 28  | 0.0  | 630.0 | 810.0  | -180.0 | -180.0  | 1 |
| 31 | 14 | 2  | 2 | 1 | 1 | 1 | 100 | 1   | 50.5 | 404.0 | 1000.0 | -596.0 | -776.0  | 1 |
| 31 | 14 | 3  | 2 | 0 | 1 | 0 | 100 | 28  | 0.0  | 700.0 | 1000.0 | -300.0 | -1076.0 | 1 |
| 31 | 14 | 4  | 2 | 1 | 1 | 1 | 33  | 1   | 17.0 | 136.0 | 108.9  | 27.1   | -1048.9 | 1 |
| 31 | 14 | 5  | 2 | 1 | 1 | 1 | 35  | 1   | 18.0 | 144.0 | 122.5  | 21.5   | -1027.4 | 1 |
| 31 | 14 | 6  | 2 | 0 | 1 | 0 | 35  | 28  | 0.0  | 245.0 | 122.5  | 122.5  | -904.9  | 1 |
| 31 | 14 | 7  | 2 | 1 | 1 | 1 | 60  | 1   | 30.5 | 244.0 | 360.0  | -116.0 | -1020.9 | 1 |
| 31 | 14 | 8  | 2 | 1 | 1 | 1 | 10  | 1   | 5.5  | 44.0  | 10.0   | 34.0   | -986.9  | 1 |
| 31 | 14 | 9  | 2 | 0 | 1 | 0 | 35  | 50  | 0.0  | 245.0 | 122.5  | 122.5  | -864.4  | 1 |
| 31 | 14 | 10 | 2 | 0 | 1 | 0 | 35  | 28  | 0.0  | 245.0 | 122.5  | 122.5  | -741.9  | 1 |
| 31 | 14 | 11 | 2 | 0 | 0 | 0 | 33  | 28  | 0.0  | 231.0 | 108.9  | 122.1  | -619.8  | 1 |
| 31 | 14 | 12 | 2 | 0 | 1 | 0 | 35  | 28  | 0.0  | 245.0 | 122.5  | 122.5  | -497.3  | 1 |
| 31 | 14 | 13 | 2 | 1 | 1 | 1 | 30  | 100 | 65.0 | 520.0 | 90.0   | 430.0  | -67.3   | 1 |
| 31 | 14 | 14 | 2 | 1 | 1 | 1 | 30  | 2   | 16.0 | 128.0 | 90.0   | 38.0   | -29.3   | 1 |
| 31 | 14 | 15 | 2 | 1 | 1 | 1 | 30  | 1   | 15.5 | 124.0 | 90.0   | 34.0   | 4.7     | 1 |
| 31 | 14 | 16 | 2 | 1 | 1 | 1 | 35  | 1   | 18.0 | 144.0 | 122.5  | 21.5   | 26.2    | 1 |
| 31 | 14 | 17 | 2 | 1 | 1 | 1 | 50  | 5   | 27.5 | 220.0 | 250.0  | -30.0  | -3.8    | 1 |
| 31 | 14 | 18 | 2 | 1 | 1 | 1 | 25  | 1   | 13.0 | 104.0 | 62.5   | 41.5   | 37.7    | 1 |
| 31 | 14 | 19 | 2 | 1 | 1 | 1 | 35  | 5   | 20.0 | 160.0 | 122.5  | 37.5   | 75.2    | 1 |
| 31 | 14 | 20 | 2 | 1 | 1 | 1 | 40  | 40  | 40.0 | 320.0 | 160.0  | 160.0  | 235.2   | 1 |
| 31 | 14 | 21 | 2 | 1 | 1 | 1 | 45  | 1   | 23.0 | 184.0 | 202.5  | -18.5  | 216.7   | 1 |
| 31 | 14 | 22 | 2 | 1 | 1 | 1 | 35  | 1   | 18.0 | 144.0 | 122.5  | 21.5   | 238.2   | 1 |

|    |    |    |   |   |   |   |    |    |      |       |       |        |        |   |
|----|----|----|---|---|---|---|----|----|------|-------|-------|--------|--------|---|
| 31 | 14 | 23 | 2 | 1 | 0 | 0 | 25 | 28 | 0.0  | 175.0 | 62.5  | 112.5  | 350.7  | 1 |
| 31 | 14 | 24 | 2 | 0 | 1 | 0 | 35 | 28 | 0.0  | 245.0 | 122.5 | 122.5  | 473.2  | 1 |
| 31 | 14 | 25 | 2 | 1 | 1 | 1 | 35 | 1  | 18.0 | 144.0 | 122.5 | 21.5   | 494.7  | 1 |
| 31 | 14 | 26 | 2 | 0 | 1 | 0 | 35 | 28 | 0.0  | 245.0 | 122.5 | 122.5  | 617.2  | 1 |
| 31 | 14 | 27 | 2 | 0 | 1 | 0 | 35 | 28 | 0.0  | 245.0 | 122.5 | 122.5  | 739.7  | 1 |
| 31 | 14 | 28 | 2 | 0 | 1 | 0 | 36 | 28 | 0.0  | 252.0 | 129.6 | 122.4  | 862.1  | 1 |
| 31 | 14 | 29 | 2 | 1 | 1 | 1 | 40 | 15 | 27.5 | 220.0 | 160.0 | 60.0   | 922.1  | 1 |
| 31 | 14 | 30 | 2 | 0 | 1 | 0 | 35 | 28 | 0.0  | 245.0 | 122.5 | 122.5  | 1044.6 | 1 |
| 27 | 15 | 1  | 2 | 1 | 0 | 0 | 80 | 1  | 0.0  | 560.0 | 640.0 | -80.0  | -80.0  | 1 |
| 27 | 15 | 2  | 2 | 0 | 1 | 0 | 70 | 2  | 0.0  | 490.0 | 490.0 | 0.0    | -80.0  | 1 |
| 27 | 15 | 3  | 2 | 0 | 1 | 0 | 75 | 1  | 0.0  | 525.0 | 562.5 | -37.5  | -117.5 | 1 |
| 27 | 15 | 4  | 2 | 0 | 0 | 0 | 77 | 3  | 0.0  | 539.0 | 592.9 | -53.9  | -171.4 | 1 |
| 27 | 15 | 5  | 2 | 0 | 1 | 0 | 85 | 1  | 0.0  | 595.0 | 722.5 | -127.5 | -298.9 | 1 |
| 27 | 15 | 6  | 2 | 0 | 0 | 0 | 88 | 4  | 0.0  | 616.0 | 774.4 | -158.4 | -457.3 | 1 |
| 27 | 15 | 7  | 2 | 0 | 1 | 0 | 89 | 1  | 0.0  | 623.0 | 792.1 | -169.1 | -626.4 | 1 |
| 27 | 15 | 8  | 2 | 0 | 0 | 0 | 50 | 1  | 0.0  | 350.0 | 250.0 | 100.0  | -526.4 | 1 |
| 27 | 15 | 9  | 2 | 1 | 1 | 1 | 55 | 6  | 30.5 | 244.0 | 302.5 | -58.5  | -584.9 | 1 |
| 27 | 15 | 10 | 2 | 1 | 0 | 0 | 65 | 5  | 0.0  | 455.0 | 422.5 | 32.5   | -552.4 | 1 |
| 27 | 15 | 11 | 2 | 0 | 1 | 0 | 49 | 7  | 0.0  | 343.0 | 240.1 | 102.9  | -449.5 | 1 |
| 27 | 15 | 12 | 2 | 1 | 0 | 0 | 45 | 1  | 0.0  | 315.0 | 202.5 | 112.5  | -337.0 | 1 |
| 27 | 15 | 13 | 2 | 0 | 1 | 0 | 40 | 8  | 0.0  | 280.0 | 160.0 | 120.0  | -217.0 | 1 |
| 27 | 15 | 14 | 2 | 1 | 0 | 0 | 45 | 9  | 0.0  | 315.0 | 202.5 | 112.5  | -104.5 | 1 |
| 27 | 15 | 15 | 2 | 1 | 0 | 0 | 49 | 8  | 0.0  | 343.0 | 240.1 | 102.9  | -1.6   | 1 |
| 27 | 15 | 16 | 2 | 1 | 1 | 1 | 44 | 2  | 23.0 | 184.0 | 193.6 | -9.6   | -11.2  | 1 |
| 27 | 15 | 17 | 2 | 1 | 0 | 0 | 85 | 3  | 0.0  | 595.0 | 722.5 | -127.5 | -138.7 | 1 |
| 27 | 15 | 18 | 2 | 0 | 0 | 0 | 35 | 6  | 0.0  | 245.0 | 122.5 | 122.5  | -16.2  | 1 |
| 27 | 15 | 19 | 2 | 0 | 0 | 0 | 45 | 50 | 0.0  | 315.0 | 202.5 | 112.5  | 96.3   | 1 |
| 27 | 15 | 20 | 2 | 1 | 1 | 1 | 46 | 52 | 49.0 | 392.0 | 211.6 | 180.4  | 276.7  | 1 |
| 27 | 15 | 21 | 2 | 0 | 0 | 0 | 45 | 49 | 0.0  | 315.0 | 202.5 | 112.5  | 389.2  | 1 |
| 27 | 15 | 22 | 2 | 0 | 0 | 0 | 82 | 56 | 0.0  | 574.0 | 672.4 | -98.4  | 290.8  | 1 |
| 27 | 15 | 23 | 2 | 1 | 1 | 1 | 50 | 50 | 50.0 | 400.0 | 250.0 | 150.0  | 440.8  | 1 |
| 27 | 15 | 24 | 2 | 1 | 0 | 0 | 55 | 65 | 0.0  | 385.0 | 302.5 | 82.5   | 523.3  | 1 |
| 27 | 15 | 25 | 2 | 0 | 1 | 0 | 56 | 2  | 0.0  | 392.0 | 313.6 | 78.4   | 601.7  | 1 |
| 27 | 15 | 26 | 2 | 0 | 1 | 0 | 65 | 3  | 0.0  | 455.0 | 422.5 | 32.5   | 634.2  | 1 |
| 27 | 15 | 27 | 2 | 1 | 0 | 0 | 67 | 6  | 0.0  | 469.0 | 448.9 | 20.1   | 654.3  | 1 |
| 27 | 15 | 28 | 2 | 1 | 1 | 1 | 54 | 5  | 29.5 | 236.0 | 291.6 | -55.6  | 598.7  | 1 |
| 27 | 15 | 29 | 2 | 0 | 1 | 0 | 45 | 7  | 0.0  | 315.0 | 202.5 | 112.5  | 711.2  | 1 |
| 27 | 15 | 30 | 2 | 0 | 0 | 0 | 47 | 3  | 0.0  | 329.0 | 220.9 | 108.1  | 819.3  | 1 |

|    |    |    |   |   |   |   |    |    |      |       |       |       |        |   |
|----|----|----|---|---|---|---|----|----|------|-------|-------|-------|--------|---|
| 30 | 15 | 1  | 2 | 0 | 1 | 0 | 1  | 80 | 0.0  | 7.0   | 0.1   | 6.9   | 6.9    | 0 |
| 30 | 15 | 2  | 2 | 1 | 0 | 0 | 2  | 70 | 0.0  | 14.0  | 0.5   | 13.5  | 20.4   | 0 |
| 30 | 15 | 3  | 2 | 1 | 0 | 0 | 1  | 75 | 0.0  | 7.0   | 0.1   | 6.9   | 27.3   | 0 |
| 30 | 15 | 4  | 2 | 0 | 0 | 0 | 3  | 77 | 0.0  | 21.0  | 1.1   | 19.9  | 47.1   | 0 |
| 30 | 15 | 5  | 2 | 1 | 0 | 0 | 1  | 85 | 0.0  | 7.0   | 0.1   | 6.9   | 54.0   | 0 |
| 30 | 15 | 6  | 2 | 0 | 0 | 0 | 4  | 88 | 0.0  | 28.0  | 2.0   | 26.0  | 80.0   | 0 |
| 30 | 15 | 7  | 2 | 1 | 0 | 0 | 1  | 89 | 0.0  | 7.0   | 0.1   | 6.9   | 86.9   | 0 |
| 30 | 15 | 8  | 2 | 0 | 0 | 0 | 1  | 50 | 0.0  | 7.0   | 0.1   | 6.9   | 93.8   | 0 |
| 30 | 15 | 9  | 2 | 1 | 1 | 1 | 6  | 55 | 30.5 | 244.0 | 4.5   | 239.5 | 333.3  | 0 |
| 30 | 15 | 10 | 2 | 0 | 1 | 0 | 5  | 65 | 0.0  | 35.0  | 3.1   | 31.9  | 365.1  | 0 |
| 30 | 15 | 11 | 2 | 1 | 0 | 0 | 7  | 49 | 0.0  | 49.0  | 6.1   | 42.9  | 408.0  | 0 |
| 30 | 15 | 12 | 2 | 0 | 1 | 0 | 1  | 45 | 0.0  | 7.0   | 0.1   | 6.9   | 414.9  | 0 |
| 30 | 15 | 13 | 2 | 1 | 0 | 0 | 8  | 40 | 0.0  | 56.0  | 8.0   | 48.0  | 462.9  | 0 |
| 30 | 15 | 14 | 2 | 0 | 1 | 0 | 9  | 45 | 0.0  | 63.0  | 10.1  | 52.9  | 515.8  | 0 |
| 30 | 15 | 15 | 2 | 0 | 1 | 0 | 8  | 49 | 0.0  | 56.0  | 8.0   | 48.0  | 563.8  | 0 |
| 30 | 15 | 16 | 2 | 1 | 1 | 1 | 2  | 44 | 23.0 | 184.0 | 0.5   | 183.5 | 747.3  | 0 |
| 30 | 15 | 17 | 2 | 0 | 1 | 0 | 3  | 85 | 0.0  | 21.0  | 1.1   | 19.9  | 767.1  | 0 |
| 30 | 15 | 18 | 2 | 0 | 0 | 0 | 6  | 35 | 0.0  | 42.0  | 4.5   | 37.5  | 804.6  | 0 |
| 30 | 15 | 19 | 2 | 0 | 0 | 0 | 50 | 45 | 0.0  | 350.0 | 312.5 | 37.5  | 842.1  | 0 |
| 30 | 15 | 20 | 2 | 1 | 1 | 1 | 52 | 46 | 49.0 | 392.0 | 338.0 | 54.0  | 896.1  | 0 |
| 30 | 15 | 21 | 2 | 0 | 0 | 0 | 49 | 45 | 0.0  | 343.0 | 300.1 | 42.9  | 939.0  | 0 |
| 30 | 15 | 22 | 2 | 0 | 0 | 0 | 56 | 82 | 0.0  | 392.0 | 392.0 | 0.0   | 939.0  | 0 |
| 30 | 15 | 23 | 2 | 1 | 1 | 1 | 50 | 50 | 50.0 | 400.0 | 312.5 | 87.5  | 1026.5 | 0 |
| 30 | 15 | 24 | 2 | 0 | 1 | 0 | 65 | 55 | 0.0  | 455.0 | 528.1 | -73.1 | 953.4  | 0 |
| 30 | 15 | 25 | 2 | 1 | 0 | 0 | 2  | 56 | 0.0  | 14.0  | 0.5   | 13.5  | 966.9  | 0 |
| 30 | 15 | 26 | 2 | 1 | 0 | 0 | 3  | 65 | 0.0  | 21.0  | 1.1   | 19.9  | 986.8  | 0 |
| 30 | 15 | 27 | 2 | 0 | 1 | 0 | 6  | 67 | 0.0  | 42.0  | 4.5   | 37.5  | 1024.3 | 0 |
| 30 | 15 | 28 | 2 | 1 | 1 | 1 | 5  | 54 | 29.5 | 236.0 | 3.1   | 232.9 | 1257.1 | 0 |
| 30 | 15 | 29 | 2 | 1 | 0 | 0 | 7  | 45 | 0.0  | 49.0  | 6.1   | 42.9  | 1300.0 | 0 |
| 30 | 15 | 30 | 2 | 0 | 0 | 0 | 3  | 47 | 0.0  | 21.0  | 1.1   | 19.9  | 1319.9 | 0 |
| 28 | 16 | 1  | 2 | 1 | 1 | 1 | 45 | 35 | 40.0 | 320.0 | 253.1 | 66.9  | 66.9   | 0 |
| 28 | 16 | 2  | 2 | 1 | 1 | 1 | 48 | 35 | 41.5 | 332.0 | 288.0 | 44.0  | 110.9  | 0 |
| 28 | 16 | 3  | 2 | 1 | 1 | 1 | 45 | 35 | 40.0 | 320.0 | 253.1 | 66.9  | 177.8  | 0 |
| 28 | 16 | 4  | 2 | 1 | 1 | 1 | 48 | 35 | 41.5 | 332.0 | 288.0 | 44.0  | 221.8  | 0 |
| 28 | 16 | 5  | 2 | 1 | 1 | 1 | 3  | 35 | 19.0 | 152.0 | 1.1   | 150.9 | 372.6  | 0 |
| 28 | 16 | 6  | 2 | 1 | 1 | 1 | 45 | 30 | 37.5 | 300.0 | 253.1 | 46.9  | 419.5  | 0 |
| 28 | 16 | 7  | 2 | 1 | 1 | 1 | 40 | 35 | 37.5 | 300.0 | 200.0 | 100.0 | 519.5  | 0 |
| 28 | 16 | 8  | 2 | 1 | 1 | 1 | 3  | 35 | 19.0 | 152.0 | 1.1   | 150.9 | 670.4  | 0 |

|    |    |    |   |   |   |   |    |    |      |       |       |       |        |   |
|----|----|----|---|---|---|---|----|----|------|-------|-------|-------|--------|---|
| 28 | 16 | 9  | 2 | 1 | 1 | 1 | 3  | 35 | 19.0 | 152.0 | 1.1   | 150.9 | 821.3  | 0 |
| 28 | 16 | 10 | 2 | 1 | 1 | 1 | 3  | 35 | 19.0 | 152.0 | 1.1   | 150.9 | 972.1  | 0 |
| 28 | 16 | 11 | 2 | 1 | 0 | 0 | 28 | 35 | 0.0  | 196.0 | 98.0  | 98.0  | 1070.1 | 0 |
| 28 | 16 | 12 | 2 | 1 | 0 | 0 | 35 | 35 | 0.0  | 245.0 | 153.1 | 91.9  | 1162.0 | 0 |
| 28 | 16 | 13 | 2 | 1 | 1 | 1 | 45 | 35 | 40.0 | 320.0 | 253.1 | 66.9  | 1228.9 | 0 |
| 28 | 16 | 14 | 2 | 1 | 1 | 1 | 35 | 35 | 35.0 | 280.0 | 153.1 | 126.9 | 1355.8 | 0 |
| 28 | 16 | 15 | 2 | 1 | 1 | 1 | 36 | 35 | 35.5 | 284.0 | 162.0 | 122.0 | 1477.8 | 0 |
| 28 | 16 | 16 | 2 | 1 | 1 | 1 | 36 | 35 | 35.5 | 284.0 | 162.0 | 122.0 | 1599.8 | 0 |
| 28 | 16 | 17 | 2 | 1 | 1 | 1 | 3  | 35 | 19.0 | 152.0 | 1.1   | 150.9 | 1750.6 | 0 |
| 28 | 16 | 18 | 2 | 1 | 0 | 0 | 28 | 35 | 0.0  | 196.0 | 98.0  | 98.0  | 1848.6 | 0 |
| 28 | 16 | 19 | 2 | 1 | 1 | 1 | 37 | 35 | 36.0 | 288.0 | 171.1 | 116.9 | 1965.5 | 0 |
| 28 | 16 | 20 | 2 | 1 | 1 | 1 | 38 | 35 | 36.5 | 292.0 | 180.5 | 111.5 | 2077.0 | 0 |
| 28 | 16 | 21 | 2 | 1 | 1 | 1 | 38 | 35 | 36.5 | 292.0 | 180.5 | 111.5 | 2188.5 | 0 |
| 28 | 16 | 22 | 2 | 1 | 1 | 1 | 3  | 35 | 19.0 | 152.0 | 1.1   | 150.9 | 2339.4 | 0 |
| 28 | 16 | 23 | 2 | 1 | 0 | 0 | 28 | 35 | 0.0  | 196.0 | 98.0  | 98.0  | 2437.4 | 0 |
| 28 | 16 | 24 | 2 | 1 | 0 | 0 | 28 | 35 | 0.0  | 196.0 | 98.0  | 98.0  | 2535.4 | 0 |
| 28 | 16 | 25 | 2 | 1 | 0 | 0 | 28 | 35 | 0.0  | 196.0 | 98.0  | 98.0  | 2633.4 | 0 |
| 28 | 16 | 26 | 2 | 1 | 1 | 1 | 3  | 35 | 19.0 | 152.0 | 1.1   | 150.9 | 2784.3 | 0 |
| 28 | 16 | 27 | 2 | 1 | 0 | 0 | 28 | 35 | 0.0  | 196.0 | 98.0  | 98.0  | 2882.3 | 0 |
| 28 | 16 | 28 | 2 | 1 | 0 | 0 | 28 | 35 | 0.0  | 196.0 | 98.0  | 98.0  | 2980.3 | 0 |
| 28 | 16 | 29 | 2 | 1 | 0 | 0 | 28 | 35 | 0.0  | 196.0 | 98.0  | 98.0  | 3078.3 | 0 |
| 28 | 16 | 30 | 2 | 1 | 0 | 0 | 28 | 35 | 0.0  | 196.0 | 98.0  | 98.0  | 3176.3 | 0 |
| 29 | 16 | 1  | 2 | 1 | 1 | 1 | 35 | 45 | 40.0 | 320.0 | 122.5 | 197.5 | 197.5  | 1 |
| 29 | 16 | 2  | 2 | 1 | 1 | 1 | 35 | 48 | 41.5 | 332.0 | 122.5 | 209.5 | 407.0  | 1 |
| 29 | 16 | 3  | 2 | 1 | 1 | 1 | 35 | 45 | 40.0 | 320.0 | 122.5 | 197.5 | 604.5  | 1 |
| 29 | 16 | 4  | 2 | 1 | 1 | 1 | 35 | 48 | 41.5 | 332.0 | 122.5 | 209.5 | 814.0  | 1 |
| 29 | 16 | 5  | 2 | 1 | 1 | 1 | 35 | 3  | 19.0 | 152.0 | 122.5 | 29.5  | 843.5  | 1 |
| 29 | 16 | 6  | 2 | 1 | 1 | 1 | 30 | 45 | 37.5 | 300.0 | 90.0  | 210.0 | 1053.5 | 1 |
| 29 | 16 | 7  | 2 | 1 | 1 | 1 | 35 | 40 | 37.5 | 300.0 | 122.5 | 177.5 | 1231.0 | 1 |
| 29 | 16 | 8  | 2 | 1 | 1 | 1 | 35 | 3  | 19.0 | 152.0 | 122.5 | 29.5  | 1260.5 | 1 |
| 29 | 16 | 9  | 2 | 1 | 1 | 1 | 35 | 3  | 19.0 | 152.0 | 122.5 | 29.5  | 1290.0 | 1 |
| 29 | 16 | 10 | 2 | 1 | 1 | 1 | 35 | 3  | 19.0 | 152.0 | 122.5 | 29.5  | 1319.5 | 1 |
| 29 | 16 | 11 | 2 | 0 | 1 | 0 | 35 | 28 | 0.0  | 245.0 | 122.5 | 122.5 | 1442.0 | 1 |
| 29 | 16 | 12 | 2 | 0 | 1 | 0 | 35 | 35 | 0.0  | 245.0 | 122.5 | 122.5 | 1564.5 | 1 |
| 29 | 16 | 13 | 2 | 1 | 1 | 1 | 35 | 45 | 40.0 | 320.0 | 122.5 | 197.5 | 1762.0 | 1 |
| 29 | 16 | 14 | 2 | 1 | 1 | 1 | 35 | 35 | 35.0 | 280.0 | 122.5 | 157.5 | 1919.5 | 1 |
| 29 | 16 | 15 | 2 | 1 | 1 | 1 | 35 | 36 | 35.5 | 284.0 | 122.5 | 161.5 | 2081.0 | 1 |
| 29 | 16 | 16 | 2 | 1 | 1 | 1 | 35 | 36 | 35.5 | 284.0 | 122.5 | 161.5 | 2242.5 | 1 |

|    |    |    |   |   |   |   |    |    |      |       |       |       |        |   |
|----|----|----|---|---|---|---|----|----|------|-------|-------|-------|--------|---|
| 29 | 16 | 17 | 2 | 1 | 1 | 1 | 35 | 3  | 19.0 | 152.0 | 122.5 | 29.5  | 2272.0 | 1 |
| 29 | 16 | 18 | 2 | 0 | 1 | 0 | 35 | 28 | 0.0  | 245.0 | 122.5 | 122.5 | 2394.5 | 1 |
| 29 | 16 | 19 | 2 | 1 | 1 | 1 | 35 | 37 | 36.0 | 288.0 | 122.5 | 165.5 | 2560.0 | 1 |
| 29 | 16 | 20 | 2 | 1 | 1 | 1 | 35 | 38 | 36.5 | 292.0 | 122.5 | 169.5 | 2729.5 | 1 |
| 29 | 16 | 21 | 2 | 1 | 1 | 1 | 35 | 38 | 36.5 | 292.0 | 122.5 | 169.5 | 2899.0 | 1 |
| 29 | 16 | 22 | 2 | 1 | 1 | 1 | 35 | 3  | 19.0 | 152.0 | 122.5 | 29.5  | 2928.5 | 1 |
| 29 | 16 | 23 | 2 | 0 | 1 | 0 | 35 | 28 | 0.0  | 245.0 | 122.5 | 122.5 | 3051.0 | 1 |
| 29 | 16 | 24 | 2 | 0 | 1 | 0 | 35 | 28 | 0.0  | 245.0 | 122.5 | 122.5 | 3173.5 | 1 |
| 29 | 16 | 25 | 2 | 0 | 1 | 0 | 35 | 28 | 0.0  | 245.0 | 122.5 | 122.5 | 3296.0 | 1 |
| 29 | 16 | 26 | 2 | 1 | 1 | 1 | 35 | 3  | 19.0 | 152.0 | 122.5 | 29.5  | 3325.5 | 1 |
| 29 | 16 | 27 | 2 | 0 | 1 | 0 | 35 | 28 | 0.0  | 245.0 | 122.5 | 122.5 | 3448.0 | 1 |
| 29 | 16 | 28 | 2 | 0 | 1 | 0 | 35 | 28 | 0.0  | 245.0 | 122.5 | 122.5 | 3570.5 | 1 |
| 29 | 16 | 29 | 2 | 0 | 1 | 0 | 35 | 28 | 0.0  | 245.0 | 122.5 | 122.5 | 3693.0 | 1 |
| 29 | 16 | 30 | 2 | 0 | 1 | 0 | 35 | 28 | 0.0  | 245.0 | 122.5 | 122.5 | 3815.5 | 1 |
| 33 | 17 | 1  | 3 | 0 | 1 | 0 | 18 | 28 | 0.0  | 126.0 | 32.4  | 93.6  | 93.6   | 1 |
| 33 | 17 | 2  | 3 | 0 | 1 | 0 | 35 | 28 | 0.0  | 245.0 | 122.5 | 122.5 | 216.1  | 1 |
| 33 | 17 | 3  | 3 | 0 | 1 | 0 | 35 | 28 | 0.0  | 245.0 | 122.5 | 122.5 | 338.6  | 1 |
| 33 | 17 | 4  | 3 | 0 | 1 | 0 | 35 | 28 | 0.0  | 245.0 | 122.5 | 122.5 | 461.1  | 1 |
| 33 | 17 | 5  | 3 | 1 | 1 | 1 | 35 | 16 | 25.5 | 204.0 | 122.5 | 81.5  | 542.6  | 1 |
| 33 | 17 | 6  | 3 | 0 | 1 | 0 | 35 | 28 | 0.0  | 245.0 | 122.5 | 122.5 | 665.1  | 1 |
| 33 | 17 | 7  | 3 | 0 | 1 | 0 | 35 | 28 | 0.0  | 245.0 | 122.5 | 122.5 | 787.6  | 1 |
| 33 | 17 | 8  | 3 | 0 | 1 | 0 | 35 | 28 | 0.0  | 245.0 | 122.5 | 122.5 | 910.1  | 1 |
| 33 | 17 | 9  | 3 | 0 | 1 | 0 | 35 | 28 | 0.0  | 245.0 | 122.5 | 122.5 | 1032.6 | 1 |
| 33 | 17 | 10 | 3 | 0 | 1 | 0 | 35 | 28 | 0.0  | 245.0 | 122.5 | 122.5 | 1155.1 | 1 |
| 33 | 17 | 11 | 3 | 0 | 1 | 0 | 35 | 28 | 0.0  | 245.0 | 122.5 | 122.5 | 1277.6 | 1 |
| 33 | 17 | 12 | 3 | 0 | 1 | 0 | 35 | 28 | 0.0  | 245.0 | 122.5 | 122.5 | 1400.1 | 1 |
| 33 | 17 | 13 | 3 | 1 | 1 | 1 | 35 | 35 | 35.0 | 280.0 | 122.5 | 157.5 | 1557.6 | 1 |
| 33 | 17 | 14 | 3 | 1 | 1 | 1 | 35 | 35 | 35.0 | 280.0 | 122.5 | 157.5 | 1715.1 | 1 |
| 33 | 17 | 15 | 3 | 1 | 1 | 1 | 35 | 35 | 35.0 | 280.0 | 122.5 | 157.5 | 1872.6 | 1 |
| 33 | 17 | 16 | 3 | 1 | 1 | 1 | 35 | 35 | 35.0 | 280.0 | 122.5 | 157.5 | 2030.1 | 1 |
| 33 | 17 | 17 | 3 | 1 | 1 | 1 | 35 | 35 | 35.0 | 280.0 | 122.5 | 157.5 | 2187.6 | 1 |
| 33 | 17 | 18 | 3 | 1 | 1 | 1 | 35 | 35 | 35.0 | 280.0 | 122.5 | 157.5 | 2345.1 | 1 |
| 33 | 17 | 19 | 3 | 1 | 1 | 1 | 35 | 35 | 35.0 | 280.0 | 122.5 | 157.5 | 2502.6 | 1 |
| 33 | 17 | 20 | 3 | 1 | 1 | 1 | 35 | 35 | 35.0 | 280.0 | 122.5 | 157.5 | 2660.1 | 1 |
| 33 | 17 | 21 | 3 | 1 | 1 | 1 | 35 | 35 | 35.0 | 280.0 | 122.5 | 157.5 | 2817.6 | 1 |
| 33 | 17 | 22 | 3 | 1 | 1 | 1 | 35 | 35 | 35.0 | 280.0 | 122.5 | 157.5 | 2975.1 | 1 |
| 33 | 17 | 23 | 3 | 1 | 1 | 1 | 35 | 35 | 35.0 | 280.0 | 122.5 | 157.5 | 3132.6 | 1 |
| 33 | 17 | 24 | 3 | 1 | 1 | 1 | 35 | 30 | 32.5 | 260.0 | 122.5 | 137.5 | 3270.1 | 1 |



|    |    |    |   |   |   |   |    |    |      |       |       |       |        |   |
|----|----|----|---|---|---|---|----|----|------|-------|-------|-------|--------|---|
| 33 | 17 | 25 | 3 | 1 | 1 | 1 | 35 | 30 | 32.5 | 260.0 | 122.5 | 137.5 | 3407.6 | 1 |
| 33 | 17 | 26 | 3 | 1 | 1 | 1 | 35 | 30 | 32.5 | 260.0 | 122.5 | 137.5 | 3545.1 | 1 |
| 33 | 17 | 27 | 3 | 1 | 1 | 1 | 35 | 29 | 32.0 | 256.0 | 122.5 | 133.5 | 3678.6 | 1 |
| 33 | 17 | 28 | 3 | 1 | 1 | 1 | 35 | 29 | 32.0 | 256.0 | 122.5 | 133.5 | 3812.1 | 1 |
| 33 | 17 | 29 | 3 | 1 | 1 | 1 | 35 | 29 | 32.0 | 256.0 | 122.5 | 133.5 | 3945.6 | 1 |
| 33 | 17 | 30 | 3 | 0 | 1 | 0 | 35 | 28 | 0.0  | 245.0 | 122.5 | 122.5 | 4068.1 | 1 |
| 36 | 17 | 1  | 3 | 1 | 0 | 0 | 28 | 18 | 0.0  | 196.0 | 98.0  | 98.0  | 98.0   | 0 |
| 36 | 17 | 2  | 3 | 1 | 0 | 0 | 28 | 35 | 0.0  | 196.0 | 98.0  | 98.0  | 196.0  | 0 |
| 36 | 17 | 3  | 3 | 1 | 0 | 0 | 28 | 35 | 0.0  | 196.0 | 98.0  | 98.0  | 294.0  | 0 |
| 36 | 17 | 4  | 3 | 1 | 0 | 0 | 28 | 35 | 0.0  | 196.0 | 98.0  | 98.0  | 392.0  | 0 |
| 36 | 17 | 5  | 3 | 1 | 1 | 1 | 16 | 35 | 25.5 | 204.0 | 32.0  | 172.0 | 564.0  | 0 |
| 36 | 17 | 6  | 3 | 1 | 0 | 0 | 28 | 35 | 0.0  | 196.0 | 98.0  | 98.0  | 662.0  | 0 |
| 36 | 17 | 7  | 3 | 1 | 0 | 0 | 28 | 35 | 0.0  | 196.0 | 98.0  | 98.0  | 760.0  | 0 |
| 36 | 17 | 8  | 3 | 1 | 0 | 0 | 28 | 35 | 0.0  | 196.0 | 98.0  | 98.0  | 858.0  | 0 |
| 36 | 17 | 9  | 3 | 1 | 0 | 0 | 28 | 35 | 0.0  | 196.0 | 98.0  | 98.0  | 956.0  | 0 |
| 36 | 17 | 10 | 3 | 1 | 0 | 0 | 28 | 35 | 0.0  | 196.0 | 98.0  | 98.0  | 1054.0 | 0 |
| 36 | 17 | 11 | 3 | 1 | 0 | 0 | 28 | 35 | 0.0  | 196.0 | 98.0  | 98.0  | 1152.0 | 0 |
| 36 | 17 | 12 | 3 | 1 | 0 | 0 | 28 | 35 | 0.0  | 196.0 | 98.0  | 98.0  | 1250.0 | 0 |
| 36 | 17 | 13 | 3 | 1 | 1 | 1 | 35 | 35 | 35.0 | 280.0 | 153.1 | 126.9 | 1376.9 | 0 |
| 36 | 17 | 14 | 3 | 1 | 1 | 1 | 35 | 35 | 35.0 | 280.0 | 153.1 | 126.9 | 1503.8 | 0 |
| 36 | 17 | 15 | 3 | 1 | 1 | 1 | 35 | 35 | 35.0 | 280.0 | 153.1 | 126.9 | 1630.6 | 0 |
| 36 | 17 | 16 | 3 | 1 | 1 | 1 | 35 | 35 | 35.0 | 280.0 | 153.1 | 126.9 | 1757.5 | 0 |
| 36 | 17 | 17 | 3 | 1 | 1 | 1 | 35 | 35 | 35.0 | 280.0 | 153.1 | 126.9 | 1884.4 | 0 |
| 36 | 17 | 18 | 3 | 1 | 1 | 1 | 35 | 35 | 35.0 | 280.0 | 153.1 | 126.9 | 2011.3 | 0 |
| 36 | 17 | 19 | 3 | 1 | 1 | 1 | 35 | 35 | 35.0 | 280.0 | 153.1 | 126.9 | 2138.1 | 0 |
| 36 | 17 | 20 | 3 | 1 | 1 | 1 | 35 | 35 | 35.0 | 280.0 | 153.1 | 126.9 | 2265.0 | 0 |
| 36 | 17 | 21 | 3 | 1 | 1 | 1 | 35 | 35 | 35.0 | 280.0 | 153.1 | 126.9 | 2391.9 | 0 |
| 36 | 17 | 22 | 3 | 1 | 1 | 1 | 35 | 35 | 35.0 | 280.0 | 153.1 | 126.9 | 2518.8 | 0 |
| 36 | 17 | 23 | 3 | 1 | 1 | 1 | 35 | 35 | 35.0 | 280.0 | 153.1 | 126.9 | 2645.6 | 0 |
| 36 | 17 | 24 | 3 | 1 | 1 | 1 | 30 | 35 | 32.5 | 260.0 | 112.5 | 147.5 | 2793.1 | 0 |
| 36 | 17 | 25 | 3 | 1 | 1 | 1 | 30 | 35 | 32.5 | 260.0 | 112.5 | 147.5 | 2940.6 | 0 |
| 36 | 17 | 26 | 3 | 1 | 1 | 1 | 30 | 35 | 32.5 | 260.0 | 112.5 | 147.5 | 3088.1 | 0 |
| 36 | 17 | 27 | 3 | 1 | 1 | 1 | 29 | 35 | 32.0 | 256.0 | 105.1 | 150.9 | 3239.0 | 0 |
| 36 | 17 | 28 | 3 | 1 | 1 | 1 | 29 | 35 | 32.0 | 256.0 | 105.1 | 150.9 | 3389.9 | 0 |
| 36 | 17 | 29 | 3 | 1 | 1 | 1 | 29 | 35 | 32.0 | 256.0 | 105.1 | 150.9 | 3540.8 | 0 |
| 36 | 17 | 30 | 3 | 1 | 0 | 0 | 28 | 35 | 0.0  | 196.0 | 98.0  | 98.0  | 3638.8 | 0 |
| 34 | 18 | 1  | 3 | 1 | 1 | 1 | 35 | 50 | 42.5 | 340.0 | 122.5 | 217.5 | 217.5  | 1 |
| 34 | 18 | 2  | 3 | 1 | 1 | 1 | 50 | 28 | 39.0 | 312.0 | 250.0 | 62.0  | 279.5  | 1 |

|    |    |    |   |   |   |   |    |    |      |       |       |       |        |   |
|----|----|----|---|---|---|---|----|----|------|-------|-------|-------|--------|---|
| 34 | 18 | 3  | 3 | 1 | 1 | 1 | 40 | 28 | 34.0 | 272.0 | 160.0 | 112.0 | 391.5  | 1 |
| 34 | 18 | 4  | 3 | 1 | 1 | 1 | 38 | 25 | 31.5 | 252.0 | 144.4 | 107.6 | 499.1  | 1 |
| 34 | 18 | 5  | 3 | 1 | 1 | 1 | 35 | 27 | 31.0 | 248.0 | 122.5 | 125.5 | 624.6  | 1 |
| 34 | 18 | 6  | 3 | 1 | 1 | 1 | 30 | 21 | 25.5 | 204.0 | 90.0  | 114.0 | 738.6  | 1 |
| 34 | 18 | 7  | 3 | 1 | 1 | 1 | 28 | 28 | 28.0 | 224.0 | 78.4  | 145.6 | 884.2  | 1 |
| 34 | 18 | 8  | 3 | 1 | 1 | 1 | 28 | 18 | 23.0 | 184.0 | 78.4  | 105.6 | 989.8  | 1 |
| 34 | 18 | 9  | 3 | 1 | 1 | 1 | 30 | 30 | 30.0 | 240.0 | 90.0  | 150.0 | 1139.8 | 1 |
| 34 | 18 | 10 | 3 | 1 | 1 | 1 | 30 | 35 | 32.5 | 260.0 | 90.0  | 170.0 | 1309.8 | 1 |
| 34 | 18 | 11 | 3 | 1 | 1 | 1 | 33 | 30 | 31.5 | 252.0 | 108.9 | 143.1 | 1452.9 | 1 |
| 34 | 18 | 12 | 3 | 1 | 1 | 1 | 33 | 28 | 30.5 | 244.0 | 108.9 | 135.1 | 1588.0 | 1 |
| 34 | 18 | 13 | 3 | 1 | 1 | 1 | 33 | 28 | 30.5 | 244.0 | 108.9 | 135.1 | 1723.1 | 1 |
| 34 | 18 | 14 | 3 | 1 | 1 | 1 | 33 | 28 | 30.5 | 244.0 | 108.9 | 135.1 | 1858.2 | 1 |
| 34 | 18 | 15 | 3 | 1 | 1 | 1 | 30 | 27 | 28.5 | 228.0 | 90.0  | 138.0 | 1996.2 | 1 |
| 34 | 18 | 16 | 3 | 1 | 1 | 1 | 30 | 29 | 29.5 | 236.0 | 90.0  | 146.0 | 2142.2 | 1 |
| 34 | 18 | 17 | 3 | 1 | 1 | 1 | 30 | 20 | 25.0 | 200.0 | 90.0  | 110.0 | 2252.2 | 1 |
| 34 | 18 | 18 | 3 | 1 | 1 | 1 | 28 | 28 | 28.0 | 224.0 | 78.4  | 145.6 | 2397.8 | 1 |
| 34 | 18 | 19 | 3 | 1 | 1 | 1 | 28 | 31 | 29.5 | 236.0 | 78.4  | 157.6 | 2555.4 | 1 |
| 34 | 18 | 20 | 3 | 1 | 1 | 1 | 29 | 28 | 28.5 | 228.0 | 84.1  | 143.9 | 2699.3 | 1 |
| 34 | 18 | 21 | 3 | 1 | 1 | 1 | 29 | 28 | 28.5 | 228.0 | 84.1  | 143.9 | 2843.2 | 1 |
| 34 | 18 | 22 | 3 | 1 | 1 | 1 | 28 | 28 | 28.0 | 224.0 | 78.4  | 145.6 | 2988.8 | 1 |
| 34 | 18 | 23 | 3 | 1 | 1 | 1 | 28 | 10 | 19.0 | 152.0 | 78.4  | 73.6  | 3062.4 | 1 |
| 34 | 18 | 24 | 3 | 0 | 1 | 0 | 35 | 25 | 0.0  | 245.0 | 122.5 | 122.5 | 3184.9 | 1 |
| 34 | 18 | 25 | 3 | 1 | 1 | 1 | 30 | 28 | 29.0 | 232.0 | 90.0  | 142.0 | 3326.9 | 1 |
| 34 | 18 | 26 | 3 | 1 | 1 | 1 | 30 | 28 | 29.0 | 232.0 | 90.0  | 142.0 | 3468.9 | 1 |
| 34 | 18 | 27 | 3 | 1 | 1 | 1 | 29 | 27 | 28.0 | 224.0 | 84.1  | 139.9 | 3608.8 | 1 |
| 34 | 18 | 28 | 3 | 1 | 1 | 1 | 30 | 26 | 28.0 | 224.0 | 90.0  | 134.0 | 3742.8 | 1 |
| 34 | 18 | 29 | 3 | 1 | 1 | 1 | 30 | 28 | 29.0 | 232.0 | 90.0  | 142.0 | 3884.8 | 1 |
| 34 | 18 | 30 | 3 | 1 | 1 | 1 | 30 | 20 | 25.0 | 200.0 | 90.0  | 110.0 | 3994.8 | 1 |
| 35 | 18 | 1  | 3 | 1 | 1 | 1 | 50 | 35 | 42.5 | 340.0 | 312.5 | 27.5  | 27.5   | 0 |
| 35 | 18 | 2  | 3 | 1 | 1 | 1 | 28 | 50 | 39.0 | 312.0 | 98.0  | 214.0 | 241.5  | 0 |
| 35 | 18 | 3  | 3 | 1 | 1 | 1 | 28 | 40 | 34.0 | 272.0 | 98.0  | 174.0 | 415.5  | 0 |
| 35 | 18 | 4  | 3 | 1 | 1 | 1 | 25 | 38 | 31.5 | 252.0 | 78.1  | 173.9 | 589.4  | 0 |
| 35 | 18 | 5  | 3 | 1 | 1 | 1 | 27 | 35 | 31.0 | 248.0 | 91.1  | 156.9 | 746.3  | 0 |
| 35 | 18 | 6  | 3 | 1 | 1 | 1 | 21 | 30 | 25.5 | 204.0 | 55.1  | 148.9 | 895.1  | 0 |
| 35 | 18 | 7  | 3 | 1 | 1 | 1 | 28 | 28 | 28.0 | 224.0 | 98.0  | 126.0 | 1021.1 | 0 |
| 35 | 18 | 8  | 3 | 1 | 1 | 1 | 18 | 28 | 23.0 | 184.0 | 40.5  | 143.5 | 1164.6 | 0 |
| 35 | 18 | 9  | 3 | 1 | 1 | 1 | 30 | 30 | 30.0 | 240.0 | 112.5 | 127.5 | 1292.1 | 0 |
| 35 | 18 | 10 | 3 | 1 | 1 | 1 | 35 | 30 | 32.5 | 260.0 | 153.1 | 106.9 | 1399.0 | 0 |

|    |    |    |   |   |   |   |    |    |      |       |       |       |        |   |
|----|----|----|---|---|---|---|----|----|------|-------|-------|-------|--------|---|
| 35 | 18 | 11 | 3 | 1 | 1 | 1 | 30 | 33 | 31.5 | 252.0 | 112.5 | 139.5 | 1538.5 | 0 |
| 35 | 18 | 12 | 3 | 1 | 1 | 1 | 28 | 33 | 30.5 | 244.0 | 98.0  | 146.0 | 1684.5 | 0 |
| 35 | 18 | 13 | 3 | 1 | 1 | 1 | 28 | 33 | 30.5 | 244.0 | 98.0  | 146.0 | 1830.5 | 0 |
| 35 | 18 | 14 | 3 | 1 | 1 | 1 | 28 | 33 | 30.5 | 244.0 | 98.0  | 146.0 | 1976.5 | 0 |
| 35 | 18 | 15 | 3 | 1 | 1 | 1 | 27 | 30 | 28.5 | 228.0 | 91.1  | 136.9 | 2113.4 | 0 |
| 35 | 18 | 16 | 3 | 1 | 1 | 1 | 29 | 30 | 29.5 | 236.0 | 105.1 | 130.9 | 2244.3 | 0 |
| 35 | 18 | 17 | 3 | 1 | 1 | 1 | 20 | 30 | 25.0 | 200.0 | 50.0  | 150.0 | 2394.3 | 0 |
| 35 | 18 | 18 | 3 | 1 | 1 | 1 | 28 | 28 | 28.0 | 224.0 | 98.0  | 126.0 | 2520.3 | 0 |
| 35 | 18 | 19 | 3 | 1 | 1 | 1 | 31 | 28 | 29.5 | 236.0 | 120.1 | 115.9 | 2636.1 | 0 |
| 35 | 18 | 20 | 3 | 1 | 1 | 1 | 28 | 29 | 28.5 | 228.0 | 98.0  | 130.0 | 2766.1 | 0 |
| 35 | 18 | 21 | 3 | 1 | 1 | 1 | 28 | 29 | 28.5 | 228.0 | 98.0  | 130.0 | 2896.1 | 0 |
| 35 | 18 | 22 | 3 | 1 | 1 | 1 | 28 | 28 | 28.0 | 224.0 | 98.0  | 126.0 | 3022.1 | 0 |
| 35 | 18 | 23 | 3 | 1 | 1 | 1 | 10 | 28 | 19.0 | 152.0 | 12.5  | 139.5 | 3161.6 | 0 |
| 35 | 18 | 24 | 3 | 1 | 0 | 0 | 25 | 35 | 0.0  | 175.0 | 78.1  | 96.9  | 3258.5 | 0 |
| 35 | 18 | 25 | 3 | 1 | 1 | 1 | 28 | 30 | 29.0 | 232.0 | 98.0  | 134.0 | 3392.5 | 0 |
| 35 | 18 | 26 | 3 | 1 | 1 | 1 | 28 | 30 | 29.0 | 232.0 | 98.0  | 134.0 | 3526.5 | 0 |
| 35 | 18 | 27 | 3 | 1 | 1 | 1 | 27 | 29 | 28.0 | 224.0 | 91.1  | 132.9 | 3659.4 | 0 |
| 35 | 18 | 28 | 3 | 1 | 1 | 1 | 26 | 30 | 28.0 | 224.0 | 84.5  | 139.5 | 3798.9 | 0 |
| 35 | 18 | 29 | 3 | 1 | 1 | 1 | 28 | 30 | 29.0 | 232.0 | 98.0  | 134.0 | 3932.9 | 0 |
| 35 | 18 | 30 | 3 | 1 | 1 | 1 | 20 | 30 | 25.0 | 200.0 | 50.0  | 150.0 | 4082.9 | 0 |
| 37 | 19 | 1  | 3 | 0 | 1 | 0 | 20 | 79 | 0.0  | 140.0 | 40.0  | 100.0 | 100.0  | 1 |
| 37 | 19 | 2  | 3 | 0 | 1 | 0 | 35 | 32 | 0.0  | 245.0 | 122.5 | 122.5 | 222.5  | 1 |
| 37 | 19 | 3  | 3 | 0 | 1 | 0 | 35 | 28 | 0.0  | 245.0 | 122.5 | 122.5 | 345.0  | 1 |
| 37 | 19 | 4  | 3 | 1 | 0 | 0 | 35 | 28 | 0.0  | 245.0 | 122.5 | 122.5 | 467.5  | 1 |
| 37 | 19 | 5  | 3 | 1 | 1 | 1 | 40 | 28 | 34.0 | 272.0 | 160.0 | 112.0 | 579.5  | 1 |
| 37 | 19 | 6  | 3 | 1 | 1 | 1 | 35 | 28 | 31.5 | 252.0 | 122.5 | 129.5 | 709.0  | 1 |
| 37 | 19 | 7  | 3 | 1 | 1 | 1 | 37 | 28 | 32.5 | 260.0 | 136.9 | 123.1 | 832.1  | 1 |
| 37 | 19 | 8  | 3 | 1 | 1 | 1 | 36 | 31 | 33.5 | 268.0 | 129.6 | 138.4 | 970.5  | 1 |
| 37 | 19 | 9  | 3 | 1 | 1 | 1 | 36 | 36 | 36.0 | 288.0 | 129.6 | 158.4 | 1128.9 | 1 |
| 37 | 19 | 10 | 3 | 1 | 1 | 1 | 40 | 40 | 40.0 | 320.0 | 160.0 | 160.0 | 1288.9 | 1 |
| 37 | 19 | 11 | 3 | 1 | 1 | 1 | 50 | 45 | 47.5 | 380.0 | 250.0 | 130.0 | 1418.9 | 1 |
| 37 | 19 | 12 | 3 | 1 | 1 | 1 | 45 | 50 | 47.5 | 380.0 | 202.5 | 177.5 | 1596.4 | 1 |
| 37 | 19 | 13 | 3 | 1 | 1 | 1 | 50 | 55 | 52.5 | 420.0 | 250.0 | 170.0 | 1766.4 | 1 |
| 37 | 19 | 14 | 3 | 1 | 1 | 1 | 55 | 79 | 67.0 | 536.0 | 302.5 | 233.5 | 1999.9 | 1 |
| 37 | 19 | 15 | 3 | 1 | 1 | 1 | 60 | 28 | 44.0 | 352.0 | 360.0 | -8.0  | 1991.9 | 1 |
| 37 | 19 | 16 | 3 | 1 | 1 | 1 | 40 | 55 | 47.5 | 380.0 | 160.0 | 220.0 | 2211.9 | 1 |
| 37 | 19 | 17 | 3 | 1 | 1 | 1 | 45 | 28 | 36.5 | 292.0 | 202.5 | 89.5  | 2301.4 | 1 |
| 37 | 19 | 18 | 3 | 1 | 1 | 1 | 40 | 50 | 45.0 | 360.0 | 160.0 | 200.0 | 2501.4 | 1 |

|    |    |    |   |   |   |   |    |    |      |       |       |        |        |   |
|----|----|----|---|---|---|---|----|----|------|-------|-------|--------|--------|---|
| 37 | 19 | 19 | 3 | 1 | 1 | 1 | 42 | 50 | 46.0 | 368.0 | 176.4 | 191.6  | 2693.0 | 1 |
| 37 | 19 | 20 | 3 | 1 | 1 | 1 | 44 | 55 | 49.5 | 396.0 | 193.6 | 202.4  | 2895.4 | 1 |
| 37 | 19 | 21 | 3 | 1 | 1 | 1 | 50 | 28 | 39.0 | 312.0 | 250.0 | 62.0   | 2957.4 | 1 |
| 37 | 19 | 22 | 3 | 1 | 1 | 1 | 40 | 50 | 45.0 | 360.0 | 160.0 | 200.0  | 3157.4 | 1 |
| 37 | 19 | 23 | 3 | 1 | 1 | 1 | 20 | 28 | 24.0 | 192.0 | 40.0  | 152.0  | 3309.4 | 1 |
| 37 | 19 | 24 | 3 | 1 | 1 | 1 | 30 | 28 | 29.0 | 232.0 | 90.0  | 142.0  | 3451.4 | 1 |
| 37 | 19 | 25 | 3 | 1 | 1 | 1 | 25 | 28 | 26.5 | 212.0 | 62.5  | 149.5  | 3600.9 | 1 |
| 37 | 19 | 26 | 3 | 1 | 1 | 1 | 20 | 28 | 24.0 | 192.0 | 40.0  | 152.0  | 3752.9 | 1 |
| 37 | 19 | 27 | 3 | 1 | 1 | 1 | 28 | 45 | 36.5 | 292.0 | 78.4  | 213.6  | 3966.5 | 1 |
| 37 | 19 | 28 | 3 | 1 | 1 | 1 | 35 | 28 | 31.5 | 252.0 | 122.5 | 129.5  | 4096.0 | 1 |
| 37 | 19 | 29 | 3 | 1 | 1 | 1 | 28 | 28 | 28.0 | 224.0 | 78.4  | 145.6  | 4241.6 | 1 |
| 37 | 19 | 30 | 3 | 1 | 1 | 1 | 25 | 30 | 27.5 | 220.0 | 62.5  | 157.5  | 4399.1 | 1 |
| 40 | 19 | 1  | 3 | 1 | 0 | 0 | 79 | 20 | 0.0  | 553.0 | 780.1 | -227.1 | -227.1 | 0 |
| 40 | 19 | 2  | 3 | 1 | 0 | 0 | 32 | 35 | 0.0  | 224.0 | 128.0 | 96.0   | -131.1 | 0 |
| 40 | 19 | 3  | 3 | 1 | 0 | 0 | 28 | 35 | 0.0  | 196.0 | 98.0  | 98.0   | -33.1  | 0 |
| 40 | 19 | 4  | 3 | 0 | 1 | 0 | 28 | 35 | 0.0  | 196.0 | 98.0  | 98.0   | 64.9   | 0 |
| 40 | 19 | 5  | 3 | 1 | 1 | 1 | 28 | 40 | 34.0 | 272.0 | 98.0  | 174.0  | 238.9  | 0 |
| 40 | 19 | 6  | 3 | 1 | 1 | 1 | 28 | 35 | 31.5 | 252.0 | 98.0  | 154.0  | 392.9  | 0 |
| 40 | 19 | 7  | 3 | 1 | 1 | 1 | 28 | 37 | 32.5 | 260.0 | 98.0  | 162.0  | 554.9  | 0 |
| 40 | 19 | 8  | 3 | 1 | 1 | 1 | 31 | 36 | 33.5 | 268.0 | 120.1 | 147.9  | 702.8  | 0 |
| 40 | 19 | 9  | 3 | 1 | 1 | 1 | 36 | 36 | 36.0 | 288.0 | 162.0 | 126.0  | 828.8  | 0 |
| 40 | 19 | 10 | 3 | 1 | 1 | 1 | 40 | 40 | 40.0 | 320.0 | 200.0 | 120.0  | 948.8  | 0 |
| 40 | 19 | 11 | 3 | 1 | 1 | 1 | 45 | 50 | 47.5 | 380.0 | 253.1 | 126.9  | 1075.6 | 0 |
| 40 | 19 | 12 | 3 | 1 | 1 | 1 | 50 | 45 | 47.5 | 380.0 | 312.5 | 67.5   | 1143.1 | 0 |
| 40 | 19 | 13 | 3 | 1 | 1 | 1 | 55 | 50 | 52.5 | 420.0 | 378.1 | 41.9   | 1185.0 | 0 |
| 40 | 19 | 14 | 3 | 1 | 1 | 1 | 79 | 55 | 67.0 | 536.0 | 780.1 | -244.1 | 940.9  | 0 |
| 40 | 19 | 15 | 3 | 1 | 1 | 1 | 28 | 60 | 44.0 | 352.0 | 98.0  | 254.0  | 1194.9 | 0 |
| 40 | 19 | 16 | 3 | 1 | 1 | 1 | 55 | 40 | 47.5 | 380.0 | 378.1 | 1.9    | 1196.8 | 0 |
| 40 | 19 | 17 | 3 | 1 | 1 | 1 | 28 | 45 | 36.5 | 292.0 | 98.0  | 194.0  | 1390.8 | 0 |
| 40 | 19 | 18 | 3 | 1 | 1 | 1 | 50 | 40 | 45.0 | 360.0 | 312.5 | 47.5   | 1438.3 | 0 |
| 40 | 19 | 19 | 3 | 1 | 1 | 1 | 50 | 42 | 46.0 | 368.0 | 312.5 | 55.5   | 1493.8 | 0 |
| 40 | 19 | 20 | 3 | 1 | 1 | 1 | 55 | 44 | 49.5 | 396.0 | 378.1 | 17.9   | 1511.6 | 0 |
| 40 | 19 | 21 | 3 | 1 | 1 | 1 | 28 | 50 | 39.0 | 312.0 | 98.0  | 214.0  | 1725.6 | 0 |
| 40 | 19 | 22 | 3 | 1 | 1 | 1 | 50 | 40 | 45.0 | 360.0 | 312.5 | 47.5   | 1773.1 | 0 |
| 40 | 19 | 23 | 3 | 1 | 1 | 1 | 28 | 20 | 24.0 | 192.0 | 98.0  | 94.0   | 1867.1 | 0 |
| 40 | 19 | 24 | 3 | 1 | 1 | 1 | 28 | 30 | 29.0 | 232.0 | 98.0  | 134.0  | 2001.1 | 0 |
| 40 | 19 | 25 | 3 | 1 | 1 | 1 | 28 | 25 | 26.5 | 212.0 | 98.0  | 114.0  | 2115.1 | 0 |
| 40 | 19 | 26 | 3 | 1 | 1 | 1 | 28 | 20 | 24.0 | 192.0 | 98.0  | 94.0   | 2209.1 | 0 |

|    |    |    |   |   |   |   |     |    |      |       |        |        |        |   |
|----|----|----|---|---|---|---|-----|----|------|-------|--------|--------|--------|---|
| 40 | 19 | 27 | 3 | 1 | 1 | 1 | 45  | 28 | 36.5 | 292.0 | 253.1  | 38.9   | 2248.0 | 0 |
| 40 | 19 | 28 | 3 | 1 | 1 | 1 | 28  | 35 | 31.5 | 252.0 | 98.0   | 154.0  | 2402.0 | 0 |
| 40 | 19 | 29 | 3 | 1 | 1 | 1 | 28  | 28 | 28.0 | 224.0 | 98.0   | 126.0  | 2528.0 | 0 |
| 40 | 19 | 30 | 3 | 1 | 1 | 1 | 30  | 25 | 27.5 | 220.0 | 112.5  | 107.5  | 2635.5 | 0 |
| 38 | 20 | 1  | 3 | 0 | 0 | 0 | 20  | 55 | 0.0  | 140.0 | 40.0   | 100.0  | 100.0  | 1 |
| 38 | 20 | 2  | 3 | 0 | 0 | 0 | 20  | 15 | 0.0  | 140.0 | 40.0   | 100.0  | 200.0  | 1 |
| 38 | 20 | 3  | 3 | 0 | 0 | 0 | 20  | 40 | 0.0  | 140.0 | 40.0   | 100.0  | 300.0  | 1 |
| 38 | 20 | 4  | 3 | 0 | 0 | 0 | 30  | 5  | 0.0  | 210.0 | 90.0   | 120.0  | 420.0  | 1 |
| 38 | 20 | 5  | 3 | 0 | 0 | 0 | 31  | 26 | 0.0  | 217.0 | 96.1   | 120.9  | 540.9  | 1 |
| 38 | 20 | 6  | 3 | 0 | 0 | 0 | 33  | 1  | 0.0  | 231.0 | 108.9  | 122.1  | 663.0  | 1 |
| 38 | 20 | 7  | 3 | 0 | 1 | 0 | 35  | 3  | 0.0  | 245.0 | 122.5  | 122.5  | 785.5  | 1 |
| 38 | 20 | 8  | 3 | 0 | 0 | 0 | 35  | 1  | 0.0  | 245.0 | 122.5  | 122.5  | 908.0  | 1 |
| 38 | 20 | 9  | 3 | 0 | 1 | 0 | 35  | 2  | 0.0  | 245.0 | 122.5  | 122.5  | 1030.5 | 1 |
| 38 | 20 | 10 | 3 | 0 | 1 | 0 | 36  | 1  | 0.0  | 252.0 | 129.6  | 122.4  | 1152.9 | 1 |
| 38 | 20 | 11 | 3 | 0 | 1 | 0 | 35  | 1  | 0.0  | 245.0 | 122.5  | 122.5  | 1275.4 | 1 |
| 38 | 20 | 12 | 3 | 0 | 0 | 0 | 35  | 0  | 0.0  | 245.0 | 122.5  | 122.5  | 1397.9 | 1 |
| 38 | 20 | 13 | 3 | 0 | 0 | 0 | 38  | 15 | 0.0  | 266.0 | 144.4  | 121.6  | 1519.5 | 1 |
| 38 | 20 | 14 | 3 | 0 | 0 | 0 | 35  | 25 | 0.0  | 245.0 | 122.5  | 122.5  | 1642.0 | 1 |
| 38 | 20 | 15 | 3 | 0 | 0 | 0 | 35  | 35 | 0.0  | 245.0 | 122.5  | 122.5  | 1764.5 | 1 |
| 38 | 20 | 16 | 3 | 0 | 0 | 0 | 35  | 29 | 0.0  | 245.0 | 122.5  | 122.5  | 1887.0 | 1 |
| 38 | 20 | 17 | 3 | 1 | 0 | 0 | 35  | 26 | 0.0  | 245.0 | 122.5  | 122.5  | 2009.5 | 1 |
| 38 | 20 | 18 | 3 | 1 | 1 | 1 | 50  | 27 | 38.5 | 308.0 | 250.0  | 58.0   | 2067.5 | 1 |
| 38 | 20 | 19 | 3 | 1 | 1 | 1 | 100 | 16 | 58.0 | 464.0 | 1000.0 | -536.0 | 1531.5 | 1 |
| 38 | 20 | 20 | 3 | 1 | 1 | 1 | 50  | 12 | 31.0 | 248.0 | 250.0  | -2.0   | 1529.5 | 1 |
| 38 | 20 | 21 | 3 | 0 | 1 | 0 | 35  | 27 | 0.0  | 245.0 | 122.5  | 122.5  | 1652.0 | 1 |
| 38 | 20 | 22 | 3 | 1 | 1 | 1 | 50  | 25 | 37.5 | 300.0 | 250.0  | 50.0   | 1702.0 | 1 |
| 38 | 20 | 23 | 3 | 1 | 1 | 1 | 50  | 30 | 40.0 | 320.0 | 250.0  | 70.0   | 1772.0 | 1 |
| 38 | 20 | 24 | 3 | 0 | 1 | 0 | 35  | 22 | 0.0  | 245.0 | 122.5  | 122.5  | 1894.5 | 1 |
| 38 | 20 | 25 | 3 | 0 | 1 | 0 | 35  | 22 | 0.0  | 245.0 | 122.5  | 122.5  | 2017.0 | 1 |
| 38 | 20 | 26 | 3 | 0 | 1 | 0 | 35  | 22 | 0.0  | 245.0 | 122.5  | 122.5  | 2139.5 | 1 |
| 38 | 20 | 27 | 3 | 0 | 1 | 0 | 35  | 22 | 0.0  | 245.0 | 122.5  | 122.5  | 2262.0 | 1 |
| 38 | 20 | 28 | 3 | 0 | 1 | 0 | 35  | 22 | 0.0  | 245.0 | 122.5  | 122.5  | 2384.5 | 1 |
| 38 | 20 | 29 | 3 | 0 | 1 | 0 | 35  | 22 | 0.0  | 245.0 | 122.5  | 122.5  | 2507.0 | 1 |
| 38 | 20 | 30 | 3 | 0 | 1 | 0 | 35  | 21 | 0.0  | 245.0 | 122.5  | 122.5  | 2629.5 | 1 |
| 39 | 20 | 1  | 3 | 0 | 0 | 0 | 55  | 20 | 0.0  | 385.0 | 378.1  | 6.9    | 6.9    | 0 |
| 39 | 20 | 2  | 3 | 0 | 0 | 0 | 15  | 20 | 0.0  | 105.0 | 28.1   | 76.9   | 83.8   | 0 |
| 39 | 20 | 3  | 3 | 0 | 0 | 0 | 40  | 20 | 0.0  | 280.0 | 200.0  | 80.0   | 163.8  | 0 |
| 39 | 20 | 4  | 3 | 0 | 0 | 0 | 5   | 30 | 0.0  | 35.0  | 3.1    | 31.9   | 195.6  | 0 |

|    |    |    |   |   |   |   |    |     |      |       |       |       |        |   |
|----|----|----|---|---|---|---|----|-----|------|-------|-------|-------|--------|---|
| 39 | 20 | 5  | 3 | 0 | 0 | 0 | 26 | 31  | 0.0  | 182.0 | 84.5  | 97.5  | 293.1  | 0 |
| 39 | 20 | 6  | 3 | 0 | 0 | 0 | 1  | 33  | 0.0  | 7.0   | 0.1   | 6.9   | 300.0  | 0 |
| 39 | 20 | 7  | 3 | 1 | 0 | 0 | 3  | 35  | 0.0  | 21.0  | 1.1   | 19.9  | 319.9  | 0 |
| 39 | 20 | 8  | 3 | 0 | 0 | 0 | 1  | 35  | 0.0  | 7.0   | 0.1   | 6.9   | 326.8  | 0 |
| 39 | 20 | 9  | 3 | 1 | 0 | 0 | 2  | 35  | 0.0  | 14.0  | 0.5   | 13.5  | 340.3  | 0 |
| 39 | 20 | 10 | 3 | 1 | 0 | 0 | 1  | 36  | 0.0  | 7.0   | 0.1   | 6.9   | 347.1  | 0 |
| 39 | 20 | 11 | 3 | 1 | 0 | 0 | 1  | 35  | 0.0  | 7.0   | 0.1   | 6.9   | 354.0  | 0 |
| 39 | 20 | 12 | 3 | 0 | 0 | 0 | 0  | 35  | 0.0  | 0.0   | 0.0   | 0.0   | 354.0  | 0 |
| 39 | 20 | 13 | 3 | 0 | 0 | 0 | 15 | 38  | 0.0  | 105.0 | 28.1  | 76.9  | 430.9  | 0 |
| 39 | 20 | 14 | 3 | 0 | 0 | 0 | 25 | 35  | 0.0  | 175.0 | 78.1  | 96.9  | 527.8  | 0 |
| 39 | 20 | 15 | 3 | 0 | 0 | 0 | 35 | 35  | 0.0  | 245.0 | 153.1 | 91.9  | 619.6  | 0 |
| 39 | 20 | 16 | 3 | 0 | 0 | 0 | 29 | 35  | 0.0  | 203.0 | 105.1 | 97.9  | 717.5  | 0 |
| 39 | 20 | 17 | 3 | 0 | 1 | 0 | 26 | 35  | 0.0  | 182.0 | 84.5  | 97.5  | 815.0  | 0 |
| 39 | 20 | 18 | 3 | 1 | 1 | 1 | 27 | 50  | 38.5 | 308.0 | 91.1  | 216.9 | 1031.9 | 0 |
| 39 | 20 | 19 | 3 | 1 | 1 | 1 | 16 | 100 | 58.0 | 464.0 | 32.0  | 432.0 | 1463.9 | 0 |
| 39 | 20 | 20 | 3 | 1 | 1 | 1 | 12 | 50  | 31.0 | 248.0 | 18.0  | 230.0 | 1693.9 | 0 |
| 39 | 20 | 21 | 3 | 1 | 0 | 0 | 27 | 35  | 0.0  | 189.0 | 91.1  | 97.9  | 1791.8 | 0 |
| 39 | 20 | 22 | 3 | 1 | 1 | 1 | 25 | 50  | 37.5 | 300.0 | 78.1  | 221.9 | 2013.6 | 0 |
| 39 | 20 | 23 | 3 | 1 | 1 | 1 | 30 | 50  | 40.0 | 320.0 | 112.5 | 207.5 | 2221.1 | 0 |
| 39 | 20 | 24 | 3 | 1 | 0 | 0 | 22 | 35  | 0.0  | 154.0 | 60.5  | 93.5  | 2314.6 | 0 |
| 39 | 20 | 25 | 3 | 1 | 0 | 0 | 22 | 35  | 0.0  | 154.0 | 60.5  | 93.5  | 2408.1 | 0 |
| 39 | 20 | 26 | 3 | 1 | 0 | 0 | 22 | 35  | 0.0  | 154.0 | 60.5  | 93.5  | 2501.6 | 0 |
| 39 | 20 | 27 | 3 | 1 | 0 | 0 | 22 | 35  | 0.0  | 154.0 | 60.5  | 93.5  | 2595.1 | 0 |
| 39 | 20 | 28 | 3 | 1 | 0 | 0 | 22 | 35  | 0.0  | 154.0 | 60.5  | 93.5  | 2688.6 | 0 |
| 39 | 20 | 29 | 3 | 1 | 0 | 0 | 22 | 35  | 0.0  | 154.0 | 60.5  | 93.5  | 2782.1 | 0 |
| 39 | 20 | 30 | 3 | 1 | 0 | 0 | 21 | 35  | 0.0  | 147.0 | 55.1  | 91.9  | 2874.0 | 0 |
| 41 | 21 | 1  | 3 | 0 | 0 | 0 | 35 | 28  | 0.0  | 245.0 | 122.5 | 122.5 | 122.5  | 1 |
| 41 | 21 | 2  | 3 | 1 | 0 | 0 | 50 | 28  | 0.0  | 350.0 | 250.0 | 100.0 | 222.5  | 1 |
| 41 | 21 | 3  | 3 | 1 | 1 | 1 | 50 | 28  | 39.0 | 312.0 | 250.0 | 62.0  | 284.5  | 1 |
| 41 | 21 | 4  | 3 | 1 | 1 | 1 | 35 | 30  | 32.5 | 260.0 | 122.5 | 137.5 | 422.0  | 1 |
| 41 | 21 | 5  | 3 | 1 | 1 | 1 | 30 | 28  | 29.0 | 232.0 | 90.0  | 142.0 | 564.0  | 1 |
| 41 | 21 | 6  | 3 | 1 | 1 | 1 | 25 | 30  | 27.5 | 220.0 | 62.5  | 157.5 | 721.5  | 1 |
| 41 | 21 | 7  | 3 | 1 | 1 | 1 | 30 | 30  | 30.0 | 240.0 | 90.0  | 150.0 | 871.5  | 1 |
| 41 | 21 | 8  | 3 | 1 | 1 | 1 | 30 | 30  | 30.0 | 240.0 | 90.0  | 150.0 | 1021.5 | 1 |
| 41 | 21 | 9  | 3 | 1 | 1 | 1 | 20 | 30  | 25.0 | 200.0 | 40.0  | 160.0 | 1181.5 | 1 |
| 41 | 21 | 10 | 3 | 1 | 1 | 1 | 20 | 30  | 25.0 | 200.0 | 40.0  | 160.0 | 1341.5 | 1 |
| 41 | 21 | 11 | 3 | 1 | 0 | 0 | 35 | 28  | 0.0  | 245.0 | 122.5 | 122.5 | 1464.0 | 1 |
| 41 | 21 | 12 | 3 | 1 | 1 | 1 | 20 | 28  | 24.0 | 192.0 | 40.0  | 152.0 | 1616.0 | 1 |

|    |    |    |   |   |   |   |    |    |      |       |       |       |        |   |
|----|----|----|---|---|---|---|----|----|------|-------|-------|-------|--------|---|
| 41 | 21 | 13 | 3 | 1 | 0 | 0 | 22 | 28 | 0.0  | 154.0 | 48.4  | 105.6 | 1721.6 | 1 |
| 41 | 21 | 14 | 3 | 1 | 1 | 1 | 25 | 28 | 26.5 | 212.0 | 62.5  | 149.5 | 1871.1 | 1 |
| 41 | 21 | 15 | 3 | 1 | 1 | 1 | 25 | 28 | 26.5 | 212.0 | 62.5  | 149.5 | 2020.6 | 1 |
| 41 | 21 | 16 | 3 | 1 | 1 | 1 | 26 | 30 | 28.0 | 224.0 | 67.6  | 156.4 | 2177.0 | 1 |
| 41 | 21 | 17 | 3 | 1 | 1 | 1 | 27 | 28 | 27.5 | 220.0 | 72.9  | 147.1 | 2324.1 | 1 |
| 41 | 21 | 18 | 3 | 1 | 1 | 1 | 30 | 30 | 30.0 | 240.0 | 90.0  | 150.0 | 2474.1 | 1 |
| 41 | 21 | 19 | 3 | 1 | 1 | 1 | 35 | 30 | 32.5 | 260.0 | 122.5 | 137.5 | 2611.6 | 1 |
| 41 | 21 | 20 | 3 | 1 | 1 | 1 | 32 | 35 | 33.5 | 268.0 | 102.4 | 165.6 | 2777.2 | 1 |
| 41 | 21 | 21 | 3 | 1 | 1 | 1 | 40 | 30 | 35.0 | 280.0 | 160.0 | 120.0 | 2897.2 | 1 |
| 41 | 21 | 22 | 3 | 1 | 1 | 1 | 40 | 30 | 35.0 | 280.0 | 160.0 | 120.0 | 3017.2 | 1 |
| 41 | 21 | 23 | 3 | 1 | 1 | 1 | 35 | 30 | 32.5 | 260.0 | 122.5 | 137.5 | 3154.7 | 1 |
| 41 | 21 | 24 | 3 | 1 | 1 | 1 | 30 | 30 | 30.0 | 240.0 | 90.0  | 150.0 | 3304.7 | 1 |
| 41 | 21 | 25 | 3 | 1 | 1 | 1 | 32 | 30 | 31.0 | 248.0 | 102.4 | 145.6 | 3450.3 | 1 |
| 41 | 21 | 26 | 3 | 1 | 1 | 1 | 32 | 30 | 31.0 | 248.0 | 102.4 | 145.6 | 3595.9 | 1 |
| 41 | 21 | 27 | 3 | 1 | 1 | 1 | 28 | 31 | 29.5 | 236.0 | 78.4  | 157.6 | 3753.5 | 1 |
| 41 | 21 | 28 | 3 | 1 | 1 | 1 | 30 | 28 | 29.0 | 232.0 | 90.0  | 142.0 | 3895.5 | 1 |
| 41 | 21 | 29 | 3 | 1 | 1 | 1 | 30 | 28 | 29.0 | 232.0 | 90.0  | 142.0 | 4037.5 | 1 |
| 41 | 21 | 30 | 3 | 1 | 1 | 1 | 28 | 40 | 34.0 | 272.0 | 78.4  | 193.6 | 4231.1 | 1 |
| 48 | 21 | 1  | 3 | 0 | 0 | 0 | 28 | 35 | 0.0  | 196.0 | 98.0  | 98.0  | 98.0   | 0 |
| 48 | 21 | 2  | 3 | 0 | 1 | 0 | 28 | 50 | 0.0  | 196.0 | 98.0  | 98.0  | 196.0  | 0 |
| 48 | 21 | 3  | 3 | 1 | 1 | 1 | 28 | 50 | 39.0 | 312.0 | 98.0  | 214.0 | 410.0  | 0 |
| 48 | 21 | 4  | 3 | 1 | 1 | 1 | 30 | 35 | 32.5 | 260.0 | 112.5 | 147.5 | 557.5  | 0 |
| 48 | 21 | 5  | 3 | 1 | 1 | 1 | 28 | 30 | 29.0 | 232.0 | 98.0  | 134.0 | 691.5  | 0 |
| 48 | 21 | 6  | 3 | 1 | 1 | 1 | 30 | 25 | 27.5 | 220.0 | 112.5 | 107.5 | 799.0  | 0 |
| 48 | 21 | 7  | 3 | 1 | 1 | 1 | 30 | 30 | 30.0 | 240.0 | 112.5 | 127.5 | 926.5  | 0 |
| 48 | 21 | 8  | 3 | 1 | 1 | 1 | 30 | 30 | 30.0 | 240.0 | 112.5 | 127.5 | 1054.0 | 0 |
| 48 | 21 | 9  | 3 | 1 | 1 | 1 | 30 | 20 | 25.0 | 200.0 | 112.5 | 87.5  | 1141.5 | 0 |
| 48 | 21 | 10 | 3 | 1 | 1 | 1 | 30 | 20 | 25.0 | 200.0 | 112.5 | 87.5  | 1229.0 | 0 |
| 48 | 21 | 11 | 3 | 0 | 1 | 0 | 28 | 35 | 0.0  | 196.0 | 98.0  | 98.0  | 1327.0 | 0 |
| 48 | 21 | 12 | 3 | 1 | 1 | 1 | 28 | 20 | 24.0 | 192.0 | 98.0  | 94.0  | 1421.0 | 0 |
| 48 | 21 | 13 | 3 | 0 | 1 | 0 | 28 | 22 | 0.0  | 196.0 | 98.0  | 98.0  | 1519.0 | 0 |
| 48 | 21 | 14 | 3 | 1 | 1 | 1 | 28 | 25 | 26.5 | 212.0 | 98.0  | 114.0 | 1633.0 | 0 |
| 48 | 21 | 15 | 3 | 1 | 1 | 1 | 28 | 25 | 26.5 | 212.0 | 98.0  | 114.0 | 1747.0 | 0 |
| 48 | 21 | 16 | 3 | 1 | 1 | 1 | 30 | 26 | 28.0 | 224.0 | 112.5 | 111.5 | 1858.5 | 0 |
| 48 | 21 | 17 | 3 | 1 | 1 | 1 | 28 | 27 | 27.5 | 220.0 | 98.0  | 122.0 | 1980.5 | 0 |
| 48 | 21 | 18 | 3 | 1 | 1 | 1 | 30 | 30 | 30.0 | 240.0 | 112.5 | 127.5 | 2108.0 | 0 |
| 48 | 21 | 19 | 3 | 1 | 1 | 1 | 30 | 35 | 32.5 | 260.0 | 112.5 | 147.5 | 2255.5 | 0 |
| 48 | 21 | 20 | 3 | 1 | 1 | 1 | 35 | 32 | 33.5 | 268.0 | 153.1 | 114.9 | 2370.4 | 0 |

|    |    |    |   |   |   |   |    |     |      |       |       |        |        |   |
|----|----|----|---|---|---|---|----|-----|------|-------|-------|--------|--------|---|
| 48 | 21 | 21 | 3 | 1 | 1 | 1 | 30 | 40  | 35.0 | 280.0 | 112.5 | 167.5  | 2537.9 | 0 |
| 48 | 21 | 22 | 3 | 1 | 1 | 1 | 30 | 40  | 35.0 | 280.0 | 112.5 | 167.5  | 2705.4 | 0 |
| 48 | 21 | 23 | 3 | 1 | 1 | 1 | 30 | 35  | 32.5 | 260.0 | 112.5 | 147.5  | 2852.9 | 0 |
| 48 | 21 | 24 | 3 | 1 | 1 | 1 | 30 | 30  | 30.0 | 240.0 | 112.5 | 127.5  | 2980.4 | 0 |
| 48 | 21 | 25 | 3 | 1 | 1 | 1 | 30 | 32  | 31.0 | 248.0 | 112.5 | 135.5  | 3115.9 | 0 |
| 48 | 21 | 26 | 3 | 1 | 1 | 1 | 30 | 32  | 31.0 | 248.0 | 112.5 | 135.5  | 3251.4 | 0 |
| 48 | 21 | 27 | 3 | 1 | 1 | 1 | 31 | 28  | 29.5 | 236.0 | 120.1 | 115.9  | 3367.3 | 0 |
| 48 | 21 | 28 | 3 | 1 | 1 | 1 | 28 | 30  | 29.0 | 232.0 | 98.0  | 134.0  | 3501.3 | 0 |
| 48 | 21 | 29 | 3 | 1 | 1 | 1 | 28 | 30  | 29.0 | 232.0 | 98.0  | 134.0  | 3635.3 | 0 |
| 48 | 21 | 30 | 3 | 1 | 1 | 1 | 40 | 28  | 34.0 | 272.0 | 200.0 | 72.0   | 3707.3 | 0 |
| 42 | 22 | 1  | 3 | 0 | 1 | 0 | 10 | 100 | 0.0  | 70.0  | 10.0  | 60.0   | 60.0   | 1 |
| 42 | 22 | 2  | 3 | 1 | 0 | 0 | 20 | 28  | 0.0  | 140.0 | 40.0  | 100.0  | 160.0  | 1 |
| 42 | 22 | 3  | 3 | 1 | 0 | 0 | 40 | 26  | 0.0  | 280.0 | 160.0 | 120.0  | 280.0  | 1 |
| 42 | 22 | 4  | 3 | 1 | 1 | 1 | 80 | 28  | 54.0 | 432.0 | 640.0 | -208.0 | 72.0   | 1 |
| 42 | 22 | 5  | 3 | 1 | 1 | 1 | 80 | 31  | 55.5 | 444.0 | 640.0 | -196.0 | -124.0 | 1 |
| 42 | 22 | 6  | 3 | 0 | 1 | 0 | 20 | 28  | 0.0  | 140.0 | 40.0  | 100.0  | -24.0  | 1 |
| 42 | 22 | 7  | 3 | 0 | 1 | 0 | 40 | 28  | 0.0  | 280.0 | 160.0 | 120.0  | 96.0   | 1 |
| 42 | 22 | 8  | 3 | 0 | 1 | 0 | 50 | 28  | 0.0  | 350.0 | 250.0 | 100.0  | 196.0  | 1 |
| 42 | 22 | 9  | 3 | 0 | 1 | 0 | 48 | 28  | 0.0  | 336.0 | 230.4 | 105.6  | 301.6  | 1 |
| 42 | 22 | 10 | 3 | 1 | 0 | 0 | 50 | 28  | 0.0  | 350.0 | 250.0 | 100.0  | 401.6  | 1 |
| 42 | 22 | 11 | 3 | 1 | 1 | 1 | 55 | 28  | 41.5 | 332.0 | 302.5 | 29.5   | 431.1  | 1 |
| 42 | 22 | 12 | 3 | 1 | 1 | 1 | 40 | 10  | 25.0 | 200.0 | 160.0 | 40.0   | 471.1  | 1 |
| 42 | 22 | 13 | 3 | 1 | 1 | 1 | 55 | 28  | 41.5 | 332.0 | 302.5 | 29.5   | 500.6  | 1 |
| 42 | 22 | 14 | 3 | 0 | 1 | 0 | 55 | 28  | 0.0  | 385.0 | 302.5 | 82.5   | 583.1  | 1 |
| 42 | 22 | 15 | 3 | 0 | 1 | 0 | 60 | 28  | 0.0  | 420.0 | 360.0 | 60.0   | 643.1  | 1 |
| 42 | 22 | 16 | 3 | 1 | 1 | 1 | 55 | 28  | 41.5 | 332.0 | 302.5 | 29.5   | 672.6  | 1 |
| 42 | 22 | 17 | 3 | 1 | 1 | 1 | 45 | 28  | 36.5 | 292.0 | 202.5 | 89.5   | 762.1  | 1 |
| 42 | 22 | 18 | 3 | 1 | 1 | 1 | 40 | 31  | 35.5 | 284.0 | 160.0 | 124.0  | 886.1  | 1 |
| 42 | 22 | 19 | 3 | 1 | 1 | 1 | 40 | 28  | 34.0 | 272.0 | 160.0 | 112.0  | 998.1  | 1 |
| 42 | 22 | 20 | 3 | 1 | 1 | 1 | 38 | 20  | 29.0 | 232.0 | 144.4 | 87.6   | 1085.7 | 1 |
| 42 | 22 | 21 | 3 | 1 | 1 | 1 | 25 | 10  | 17.5 | 140.0 | 62.5  | 77.5   | 1163.2 | 1 |
| 42 | 22 | 22 | 3 | 0 | 1 | 0 | 55 | 28  | 0.0  | 385.0 | 302.5 | 82.5   | 1245.7 | 1 |
| 42 | 22 | 23 | 3 | 0 | 1 | 0 | 60 | 28  | 0.0  | 420.0 | 360.0 | 60.0   | 1305.7 | 1 |
| 42 | 22 | 24 | 3 | 1 | 1 | 1 | 35 | 20  | 27.5 | 220.0 | 122.5 | 97.5   | 1403.2 | 1 |
| 42 | 22 | 25 | 3 | 1 | 1 | 1 | 45 | 25  | 35.0 | 280.0 | 202.5 | 77.5   | 1480.7 | 1 |
| 42 | 22 | 26 | 3 | 1 | 1 | 1 | 35 | 27  | 31.0 | 248.0 | 122.5 | 125.5  | 1606.2 | 1 |
| 42 | 22 | 27 | 3 | 1 | 1 | 1 | 33 | 23  | 28.0 | 224.0 | 108.9 | 115.1  | 1721.3 | 1 |
| 42 | 22 | 28 | 3 | 1 | 1 | 1 | 35 | 27  | 31.0 | 248.0 | 122.5 | 125.5  | 1846.8 | 1 |



|    |    |    |   |   |   |   |     |    |      |       |        |        |        |   |
|----|----|----|---|---|---|---|-----|----|------|-------|--------|--------|--------|---|
| 42 | 22 | 29 | 3 | 1 | 1 | 1 | 40  | 25 | 32.5 | 260.0 | 160.0  | 100.0  | 1946.8 | 1 |
| 42 | 22 | 30 | 3 | 1 | 1 | 1 | 50  | 23 | 36.5 | 292.0 | 250.0  | 42.0   | 1988.8 | 1 |
| 47 | 22 | 1  | 3 | 1 | 0 | 0 | 100 | 10 | 0.0  | 700.0 | 1250.0 | -550.0 | -550.0 | 0 |
| 47 | 22 | 2  | 3 | 0 | 1 | 0 | 28  | 20 | 0.0  | 196.0 | 98.0   | 98.0   | -452.0 | 0 |
| 47 | 22 | 3  | 3 | 0 | 1 | 0 | 26  | 40 | 0.0  | 182.0 | 84.5   | 97.5   | -354.5 | 0 |
| 47 | 22 | 4  | 3 | 1 | 1 | 1 | 28  | 80 | 54.0 | 432.0 | 98.0   | 334.0  | -20.5  | 0 |
| 47 | 22 | 5  | 3 | 1 | 1 | 1 | 31  | 80 | 55.5 | 444.0 | 120.1  | 323.9  | 303.4  | 0 |
| 47 | 22 | 6  | 3 | 1 | 0 | 0 | 28  | 20 | 0.0  | 196.0 | 98.0   | 98.0   | 401.4  | 0 |
| 47 | 22 | 7  | 3 | 1 | 0 | 0 | 28  | 40 | 0.0  | 196.0 | 98.0   | 98.0   | 499.4  | 0 |
| 47 | 22 | 8  | 3 | 1 | 0 | 0 | 28  | 50 | 0.0  | 196.0 | 98.0   | 98.0   | 597.4  | 0 |
| 47 | 22 | 9  | 3 | 1 | 0 | 0 | 28  | 48 | 0.0  | 196.0 | 98.0   | 98.0   | 695.4  | 0 |
| 47 | 22 | 10 | 3 | 0 | 1 | 0 | 28  | 50 | 0.0  | 196.0 | 98.0   | 98.0   | 793.4  | 0 |
| 47 | 22 | 11 | 3 | 1 | 1 | 1 | 28  | 55 | 41.5 | 332.0 | 98.0   | 234.0  | 1027.4 | 0 |
| 47 | 22 | 12 | 3 | 1 | 1 | 1 | 10  | 40 | 25.0 | 200.0 | 12.5   | 187.5  | 1214.9 | 0 |
| 47 | 22 | 13 | 3 | 1 | 1 | 1 | 28  | 55 | 41.5 | 332.0 | 98.0   | 234.0  | 1448.9 | 0 |
| 47 | 22 | 14 | 3 | 1 | 0 | 0 | 28  | 55 | 0.0  | 196.0 | 98.0   | 98.0   | 1546.9 | 0 |
| 47 | 22 | 15 | 3 | 1 | 0 | 0 | 28  | 60 | 0.0  | 196.0 | 98.0   | 98.0   | 1644.9 | 0 |
| 47 | 22 | 16 | 3 | 1 | 1 | 1 | 28  | 55 | 41.5 | 332.0 | 98.0   | 234.0  | 1878.9 | 0 |
| 47 | 22 | 17 | 3 | 1 | 1 | 1 | 28  | 45 | 36.5 | 292.0 | 98.0   | 194.0  | 2072.9 | 0 |
| 47 | 22 | 18 | 3 | 1 | 1 | 1 | 31  | 40 | 35.5 | 284.0 | 120.1  | 163.9  | 2236.8 | 0 |
| 47 | 22 | 19 | 3 | 1 | 1 | 1 | 28  | 40 | 34.0 | 272.0 | 98.0   | 174.0  | 2410.8 | 0 |
| 47 | 22 | 20 | 3 | 1 | 1 | 1 | 20  | 38 | 29.0 | 232.0 | 50.0   | 182.0  | 2592.8 | 0 |
| 47 | 22 | 21 | 3 | 1 | 1 | 1 | 10  | 25 | 17.5 | 140.0 | 12.5   | 127.5  | 2720.3 | 0 |
| 47 | 22 | 22 | 3 | 1 | 0 | 0 | 28  | 55 | 0.0  | 196.0 | 98.0   | 98.0   | 2818.3 | 0 |
| 47 | 22 | 23 | 3 | 1 | 0 | 0 | 28  | 60 | 0.0  | 196.0 | 98.0   | 98.0   | 2916.3 | 0 |
| 47 | 22 | 24 | 3 | 1 | 1 | 1 | 20  | 35 | 27.5 | 220.0 | 50.0   | 170.0  | 3086.3 | 0 |
| 47 | 22 | 25 | 3 | 1 | 1 | 1 | 25  | 45 | 35.0 | 280.0 | 78.1   | 201.9  | 3288.1 | 0 |
| 47 | 22 | 26 | 3 | 1 | 1 | 1 | 27  | 35 | 31.0 | 248.0 | 91.1   | 156.9  | 3445.0 | 0 |
| 47 | 22 | 27 | 3 | 1 | 1 | 1 | 23  | 33 | 28.0 | 224.0 | 66.1   | 157.9  | 3602.9 | 0 |
| 47 | 22 | 28 | 3 | 1 | 1 | 1 | 27  | 35 | 31.0 | 248.0 | 91.1   | 156.9  | 3759.8 | 0 |
| 47 | 22 | 29 | 3 | 1 | 1 | 1 | 25  | 40 | 32.5 | 260.0 | 78.1   | 181.9  | 3941.6 | 0 |
| 47 | 22 | 30 | 3 | 1 | 1 | 1 | 23  | 50 | 36.5 | 292.0 | 66.1   | 225.9  | 4167.5 | 0 |
| 43 | 23 | 1  | 3 | 1 | 1 | 1 | 28  | 20 | 24.0 | 192.0 | 98.0   | 94.0   | 94.0   | 0 |
| 43 | 23 | 2  | 3 | 1 | 1 | 1 | 28  | 25 | 26.5 | 212.0 | 98.0   | 114.0  | 208.0  | 0 |
| 43 | 23 | 3  | 3 | 1 | 1 | 1 | 28  | 26 | 27.0 | 216.0 | 98.0   | 118.0  | 326.0  | 0 |
| 43 | 23 | 4  | 3 | 1 | 1 | 1 | 28  | 21 | 24.5 | 196.0 | 98.0   | 98.0   | 424.0  | 0 |
| 43 | 23 | 5  | 3 | 1 | 1 | 1 | 35  | 22 | 28.5 | 228.0 | 153.1  | 74.9   | 498.9  | 0 |
| 43 | 23 | 6  | 3 | 0 | 1 | 0 | 28  | 51 | 0.0  | 196.0 | 98.0   | 98.0   | 596.9  | 0 |

|    |    |    |   |   |   |   |    |    |      |       |       |       |        |   |
|----|----|----|---|---|---|---|----|----|------|-------|-------|-------|--------|---|
| 43 | 23 | 7  | 3 | 1 | 1 | 1 | 28 | 22 | 25.0 | 200.0 | 98.0  | 102.0 | 698.9  | 0 |
| 43 | 23 | 8  | 3 | 1 | 1 | 1 | 28 | 25 | 26.5 | 212.0 | 98.0  | 114.0 | 812.9  | 0 |
| 43 | 23 | 9  | 3 | 1 | 1 | 1 | 28 | 28 | 28.0 | 224.0 | 98.0  | 126.0 | 938.9  | 0 |
| 43 | 23 | 10 | 3 | 1 | 1 | 1 | 28 | 29 | 28.5 | 228.0 | 98.0  | 130.0 | 1068.9 | 0 |
| 43 | 23 | 11 | 3 | 1 | 1 | 1 | 28 | 22 | 25.0 | 200.0 | 98.0  | 102.0 | 1170.9 | 0 |
| 43 | 23 | 12 | 3 | 1 | 1 | 1 | 27 | 21 | 24.0 | 192.0 | 91.1  | 100.9 | 1271.8 | 0 |
| 43 | 23 | 13 | 3 | 1 | 1 | 1 | 28 | 24 | 26.0 | 208.0 | 98.0  | 110.0 | 1381.8 | 0 |
| 43 | 23 | 14 | 3 | 1 | 1 | 1 | 28 | 23 | 25.5 | 204.0 | 98.0  | 106.0 | 1487.8 | 0 |
| 43 | 23 | 15 | 3 | 0 | 1 | 0 | 29 | 22 | 0.0  | 203.0 | 105.1 | 97.9  | 1585.6 | 0 |
| 43 | 23 | 16 | 3 | 1 | 0 | 0 | 28 | 25 | 0.0  | 196.0 | 98.0  | 98.0  | 1683.6 | 0 |
| 43 | 23 | 17 | 3 | 0 | 1 | 0 | 35 | 26 | 0.0  | 245.0 | 153.1 | 91.9  | 1775.5 | 0 |
| 43 | 23 | 18 | 3 | 1 | 1 | 1 | 28 | 25 | 26.5 | 212.0 | 98.0  | 114.0 | 1889.5 | 0 |
| 43 | 23 | 19 | 3 | 1 | 1 | 1 | 28 | 24 | 26.0 | 208.0 | 98.0  | 110.0 | 1999.5 | 0 |
| 43 | 23 | 20 | 3 | 1 | 1 | 1 | 28 | 23 | 25.5 | 204.0 | 98.0  | 106.0 | 2105.5 | 0 |
| 43 | 23 | 21 | 3 | 1 | 1 | 1 | 29 | 23 | 26.0 | 208.0 | 105.1 | 102.9 | 2208.4 | 0 |
| 43 | 23 | 22 | 3 | 0 | 1 | 0 | 28 | 22 | 0.0  | 196.0 | 98.0  | 98.0  | 2306.4 | 0 |
| 43 | 23 | 23 | 3 | 1 | 1 | 1 | 28 | 23 | 25.5 | 204.0 | 98.0  | 106.0 | 2412.4 | 0 |
| 43 | 23 | 24 | 3 | 1 | 1 | 1 | 28 | 24 | 26.0 | 208.0 | 98.0  | 110.0 | 2522.4 | 0 |
| 43 | 23 | 25 | 3 | 1 | 1 | 1 | 28 | 22 | 25.0 | 200.0 | 98.0  | 102.0 | 2624.4 | 0 |
| 43 | 23 | 26 | 3 | 1 | 1 | 1 | 28 | 23 | 25.5 | 204.0 | 98.0  | 106.0 | 2730.4 | 0 |
| 43 | 23 | 27 | 3 | 1 | 1 | 1 | 28 | 23 | 25.5 | 204.0 | 98.0  | 106.0 | 2836.4 | 0 |
| 43 | 23 | 28 | 3 | 1 | 1 | 1 | 28 | 29 | 28.5 | 228.0 | 98.0  | 130.0 | 2966.4 | 0 |
| 43 | 23 | 29 | 3 | 1 | 1 | 1 | 28 | 23 | 25.5 | 204.0 | 98.0  | 106.0 | 3072.4 | 0 |
| 43 | 23 | 30 | 3 | 1 | 1 | 1 | 28 | 23 | 25.5 | 204.0 | 98.0  | 106.0 | 3178.4 | 0 |
| 46 | 23 | 1  | 3 | 1 | 1 | 1 | 20 | 28 | 24.0 | 192.0 | 40.0  | 152.0 | 152.0  | 1 |
| 46 | 23 | 2  | 3 | 1 | 1 | 1 | 25 | 28 | 26.5 | 212.0 | 62.5  | 149.5 | 301.5  | 1 |
| 46 | 23 | 3  | 3 | 1 | 1 | 1 | 26 | 28 | 27.0 | 216.0 | 67.6  | 148.4 | 449.9  | 1 |
| 46 | 23 | 4  | 3 | 1 | 1 | 1 | 21 | 28 | 24.5 | 196.0 | 44.1  | 151.9 | 601.8  | 1 |
| 46 | 23 | 5  | 3 | 1 | 1 | 1 | 22 | 35 | 28.5 | 228.0 | 48.4  | 179.6 | 781.4  | 1 |
| 46 | 23 | 6  | 3 | 1 | 0 | 0 | 51 | 28 | 0.0  | 357.0 | 260.1 | 96.9  | 878.3  | 1 |
| 46 | 23 | 7  | 3 | 1 | 1 | 1 | 22 | 28 | 25.0 | 200.0 | 48.4  | 151.6 | 1029.9 | 1 |
| 46 | 23 | 8  | 3 | 1 | 1 | 1 | 25 | 28 | 26.5 | 212.0 | 62.5  | 149.5 | 1179.4 | 1 |
| 46 | 23 | 9  | 3 | 1 | 1 | 1 | 28 | 28 | 28.0 | 224.0 | 78.4  | 145.6 | 1325.0 | 1 |
| 46 | 23 | 10 | 3 | 1 | 1 | 1 | 29 | 28 | 28.5 | 228.0 | 84.1  | 143.9 | 1468.9 | 1 |
| 46 | 23 | 11 | 3 | 1 | 1 | 1 | 22 | 28 | 25.0 | 200.0 | 48.4  | 151.6 | 1620.5 | 1 |
| 46 | 23 | 12 | 3 | 1 | 1 | 1 | 21 | 27 | 24.0 | 192.0 | 44.1  | 147.9 | 1768.4 | 1 |
| 46 | 23 | 13 | 3 | 1 | 1 | 1 | 24 | 28 | 26.0 | 208.0 | 57.6  | 150.4 | 1918.8 | 1 |
| 46 | 23 | 14 | 3 | 1 | 1 | 1 | 23 | 28 | 25.5 | 204.0 | 52.9  | 151.1 | 2069.9 | 1 |

|    |    |    |   |   |   |   |    |    |      |       |       |       |        |   |
|----|----|----|---|---|---|---|----|----|------|-------|-------|-------|--------|---|
| 46 | 23 | 15 | 3 | 1 | 0 | 0 | 22 | 29 | 0.0  | 154.0 | 48.4  | 105.6 | 2175.5 | 1 |
| 46 | 23 | 16 | 3 | 0 | 1 | 0 | 25 | 28 | 0.0  | 175.0 | 62.5  | 112.5 | 2288.0 | 1 |
| 46 | 23 | 17 | 3 | 1 | 0 | 0 | 26 | 35 | 0.0  | 182.0 | 67.6  | 114.4 | 2402.4 | 1 |
| 46 | 23 | 18 | 3 | 1 | 1 | 1 | 25 | 28 | 26.5 | 212.0 | 62.5  | 149.5 | 2551.9 | 1 |
| 46 | 23 | 19 | 3 | 1 | 1 | 1 | 24 | 28 | 26.0 | 208.0 | 57.6  | 150.4 | 2702.3 | 1 |
| 46 | 23 | 20 | 3 | 1 | 1 | 1 | 23 | 28 | 25.5 | 204.0 | 52.9  | 151.1 | 2853.4 | 1 |
| 46 | 23 | 21 | 3 | 1 | 1 | 1 | 23 | 29 | 26.0 | 208.0 | 52.9  | 155.1 | 3008.5 | 1 |
| 46 | 23 | 22 | 3 | 1 | 0 | 0 | 22 | 28 | 0.0  | 154.0 | 48.4  | 105.6 | 3114.1 | 1 |
| 46 | 23 | 23 | 3 | 1 | 1 | 1 | 23 | 28 | 25.5 | 204.0 | 52.9  | 151.1 | 3265.2 | 1 |
| 46 | 23 | 24 | 3 | 1 | 1 | 1 | 24 | 28 | 26.0 | 208.0 | 57.6  | 150.4 | 3415.6 | 1 |
| 46 | 23 | 25 | 3 | 1 | 1 | 1 | 22 | 28 | 25.0 | 200.0 | 48.4  | 151.6 | 3567.2 | 1 |
| 46 | 23 | 26 | 3 | 1 | 1 | 1 | 23 | 28 | 25.5 | 204.0 | 52.9  | 151.1 | 3718.3 | 1 |
| 46 | 23 | 27 | 3 | 1 | 1 | 1 | 23 | 28 | 25.5 | 204.0 | 52.9  | 151.1 | 3869.4 | 1 |
| 46 | 23 | 28 | 3 | 1 | 1 | 1 | 29 | 28 | 28.5 | 228.0 | 84.1  | 143.9 | 4013.3 | 1 |
| 46 | 23 | 29 | 3 | 1 | 1 | 1 | 23 | 28 | 25.5 | 204.0 | 52.9  | 151.1 | 4164.4 | 1 |
| 46 | 23 | 30 | 3 | 1 | 1 | 1 | 23 | 28 | 25.5 | 204.0 | 52.9  | 151.1 | 4315.5 | 1 |
| 44 | 24 | 1  | 3 | 0 | 1 | 0 | 50 | 50 | 0.0  | 350.0 | 250.0 | 100.0 | 100.0  | 1 |
| 44 | 24 | 2  | 3 | 1 | 0 | 0 | 33 | 30 | 0.0  | 231.0 | 108.9 | 122.1 | 222.1  | 1 |
| 44 | 24 | 3  | 3 | 1 | 1 | 1 | 35 | 30 | 32.5 | 260.0 | 122.5 | 137.5 | 359.6  | 1 |
| 44 | 24 | 4  | 3 | 1 | 1 | 1 | 45 | 28 | 36.5 | 292.0 | 202.5 | 89.5  | 449.1  | 1 |
| 44 | 24 | 5  | 3 | 1 | 1 | 1 | 36 | 28 | 32.0 | 256.0 | 129.6 | 126.4 | 575.5  | 1 |
| 44 | 24 | 6  | 3 | 0 | 1 | 0 | 34 | 50 | 0.0  | 238.0 | 115.6 | 122.4 | 697.9  | 1 |
| 44 | 24 | 7  | 3 | 1 | 1 | 1 | 32 | 50 | 41.0 | 328.0 | 102.4 | 225.6 | 923.5  | 1 |
| 44 | 24 | 8  | 3 | 1 | 1 | 1 | 38 | 28 | 33.0 | 264.0 | 144.4 | 119.6 | 1043.1 | 1 |
| 44 | 24 | 9  | 3 | 1 | 1 | 1 | 32 | 34 | 33.0 | 264.0 | 102.4 | 161.6 | 1204.7 | 1 |
| 44 | 24 | 10 | 3 | 1 | 1 | 1 | 39 | 30 | 34.5 | 276.0 | 152.1 | 123.9 | 1328.6 | 1 |
| 44 | 24 | 11 | 3 | 1 | 1 | 1 | 49 | 34 | 41.5 | 332.0 | 240.1 | 91.9  | 1420.5 | 1 |
| 44 | 24 | 12 | 3 | 0 | 1 | 0 | 37 | 40 | 0.0  | 259.0 | 136.9 | 122.1 | 1542.6 | 1 |
| 44 | 24 | 13 | 3 | 1 | 1 | 1 | 32 | 40 | 36.0 | 288.0 | 102.4 | 185.6 | 1728.2 | 1 |
| 44 | 24 | 14 | 3 | 1 | 1 | 1 | 32 | 28 | 30.0 | 240.0 | 102.4 | 137.6 | 1865.8 | 1 |
| 44 | 24 | 15 | 3 | 1 | 1 | 1 | 64 | 30 | 47.0 | 376.0 | 409.6 | -33.6 | 1832.2 | 1 |
| 44 | 24 | 16 | 3 | 1 | 1 | 1 | 32 | 36 | 34.0 | 272.0 | 102.4 | 169.6 | 2001.8 | 1 |
| 44 | 24 | 17 | 3 | 1 | 1 | 1 | 32 | 28 | 30.0 | 240.0 | 102.4 | 137.6 | 2139.4 | 1 |
| 44 | 24 | 18 | 3 | 1 | 1 | 1 | 35 | 32 | 33.5 | 268.0 | 122.5 | 145.5 | 2284.9 | 1 |
| 44 | 24 | 19 | 3 | 1 | 1 | 1 | 35 | 28 | 31.5 | 252.0 | 122.5 | 129.5 | 2414.4 | 1 |
| 44 | 24 | 20 | 3 | 1 | 1 | 1 | 35 | 28 | 31.5 | 252.0 | 122.5 | 129.5 | 2543.9 | 1 |
| 44 | 24 | 21 | 3 | 1 | 1 | 1 | 32 | 28 | 30.0 | 240.0 | 102.4 | 137.6 | 2681.5 | 1 |
| 44 | 24 | 22 | 3 | 1 | 1 | 1 | 32 | 34 | 33.0 | 264.0 | 102.4 | 161.6 | 2843.1 | 1 |

|    |    |    |   |   |   |   |    |    |      |       |       |       |        |   |
|----|----|----|---|---|---|---|----|----|------|-------|-------|-------|--------|---|
| 44 | 24 | 23 | 3 | 1 | 1 | 1 | 32 | 28 | 30.0 | 240.0 | 102.4 | 137.6 | 2980.7 | 1 |
| 44 | 24 | 24 | 3 | 1 | 1 | 1 | 32 | 28 | 30.0 | 240.0 | 102.4 | 137.6 | 3118.3 | 1 |
| 44 | 24 | 25 | 3 | 1 | 1 | 1 | 35 | 28 | 31.5 | 252.0 | 122.5 | 129.5 | 3247.8 | 1 |
| 44 | 24 | 26 | 3 | 1 | 1 | 1 | 32 | 28 | 30.0 | 240.0 | 102.4 | 137.6 | 3385.4 | 1 |
| 44 | 24 | 27 | 3 | 1 | 1 | 1 | 32 | 28 | 30.0 | 240.0 | 102.4 | 137.6 | 3523.0 | 1 |
| 44 | 24 | 28 | 3 | 1 | 1 | 1 | 32 | 28 | 30.0 | 240.0 | 102.4 | 137.6 | 3660.6 | 1 |
| 44 | 24 | 29 | 3 | 1 | 1 | 1 | 32 | 32 | 32.0 | 256.0 | 102.4 | 153.6 | 3814.2 | 1 |
| 44 | 24 | 30 | 3 | 1 | 1 | 1 | 32 | 28 | 30.0 | 240.0 | 102.4 | 137.6 | 3951.8 | 1 |
| 45 | 24 | 1  | 3 | 1 | 0 | 0 | 50 | 50 | 0.0  | 350.0 | 312.5 | 37.5  | 37.5   | 0 |
| 45 | 24 | 2  | 3 | 0 | 1 | 0 | 30 | 33 | 0.0  | 210.0 | 112.5 | 97.5  | 135.0  | 0 |
| 45 | 24 | 3  | 3 | 1 | 1 | 1 | 30 | 35 | 32.5 | 260.0 | 112.5 | 147.5 | 282.5  | 0 |
| 45 | 24 | 4  | 3 | 1 | 1 | 1 | 28 | 45 | 36.5 | 292.0 | 98.0  | 194.0 | 476.5  | 0 |
| 45 | 24 | 5  | 3 | 1 | 1 | 1 | 28 | 36 | 32.0 | 256.0 | 98.0  | 158.0 | 634.5  | 0 |
| 45 | 24 | 6  | 3 | 1 | 0 | 0 | 50 | 34 | 0.0  | 350.0 | 312.5 | 37.5  | 672.0  | 0 |
| 45 | 24 | 7  | 3 | 1 | 1 | 1 | 50 | 32 | 41.0 | 328.0 | 312.5 | 15.5  | 687.5  | 0 |
| 45 | 24 | 8  | 3 | 1 | 1 | 1 | 28 | 38 | 33.0 | 264.0 | 98.0  | 166.0 | 853.5  | 0 |
| 45 | 24 | 9  | 3 | 1 | 1 | 1 | 34 | 32 | 33.0 | 264.0 | 144.5 | 119.5 | 973.0  | 0 |
| 45 | 24 | 10 | 3 | 1 | 1 | 1 | 30 | 39 | 34.5 | 276.0 | 112.5 | 163.5 | 1136.5 | 0 |
| 45 | 24 | 11 | 3 | 1 | 1 | 1 | 34 | 49 | 41.5 | 332.0 | 144.5 | 187.5 | 1324.0 | 0 |
| 45 | 24 | 12 | 3 | 1 | 0 | 0 | 40 | 37 | 0.0  | 280.0 | 200.0 | 80.0  | 1404.0 | 0 |
| 45 | 24 | 13 | 3 | 1 | 1 | 1 | 40 | 32 | 36.0 | 288.0 | 200.0 | 88.0  | 1492.0 | 0 |
| 45 | 24 | 14 | 3 | 1 | 1 | 1 | 28 | 32 | 30.0 | 240.0 | 98.0  | 142.0 | 1634.0 | 0 |
| 45 | 24 | 15 | 3 | 1 | 1 | 1 | 30 | 64 | 47.0 | 376.0 | 112.5 | 263.5 | 1897.5 | 0 |
| 45 | 24 | 16 | 3 | 1 | 1 | 1 | 36 | 32 | 34.0 | 272.0 | 162.0 | 110.0 | 2007.5 | 0 |
| 45 | 24 | 17 | 3 | 1 | 1 | 1 | 28 | 32 | 30.0 | 240.0 | 98.0  | 142.0 | 2149.5 | 0 |
| 45 | 24 | 18 | 3 | 1 | 1 | 1 | 32 | 35 | 33.5 | 268.0 | 128.0 | 140.0 | 2289.5 | 0 |
| 45 | 24 | 19 | 3 | 1 | 1 | 1 | 28 | 35 | 31.5 | 252.0 | 98.0  | 154.0 | 2443.5 | 0 |
| 45 | 24 | 20 | 3 | 1 | 1 | 1 | 28 | 35 | 31.5 | 252.0 | 98.0  | 154.0 | 2597.5 | 0 |
| 45 | 24 | 21 | 3 | 1 | 1 | 1 | 28 | 32 | 30.0 | 240.0 | 98.0  | 142.0 | 2739.5 | 0 |
| 45 | 24 | 22 | 3 | 1 | 1 | 1 | 34 | 32 | 33.0 | 264.0 | 144.5 | 119.5 | 2859.0 | 0 |
| 45 | 24 | 23 | 3 | 1 | 1 | 1 | 28 | 32 | 30.0 | 240.0 | 98.0  | 142.0 | 3001.0 | 0 |
| 45 | 24 | 24 | 3 | 1 | 1 | 1 | 28 | 32 | 30.0 | 240.0 | 98.0  | 142.0 | 3143.0 | 0 |
| 45 | 24 | 25 | 3 | 1 | 1 | 1 | 28 | 35 | 31.5 | 252.0 | 98.0  | 154.0 | 3297.0 | 0 |
| 45 | 24 | 26 | 3 | 1 | 1 | 1 | 28 | 32 | 30.0 | 240.0 | 98.0  | 142.0 | 3439.0 | 0 |
| 45 | 24 | 27 | 3 | 1 | 1 | 1 | 28 | 32 | 30.0 | 240.0 | 98.0  | 142.0 | 3581.0 | 0 |
| 45 | 24 | 28 | 3 | 1 | 1 | 1 | 28 | 32 | 30.0 | 240.0 | 98.0  | 142.0 | 3723.0 | 0 |
| 45 | 24 | 29 | 3 | 1 | 1 | 1 | 32 | 32 | 32.0 | 256.0 | 128.0 | 128.0 | 3851.0 | 0 |
| 45 | 24 | 30 | 3 | 1 | 1 | 1 | 28 | 32 | 30.0 | 240.0 | 98.0  | 142.0 | 3993.0 | 0 |
