# Supplementary material
Source: MDPI journal article supplement (https://www.mdpi.com/2073-4336/2/3/277)
Supplement: s1 [file s1]

# Teaming Instructions for VOLUNTARY SYM

## Instructions

You are participating in a decision-making experiment where you have the opportunity to earn money. How much money you earn depends on your own decisions, but may also depend on those of other participants.

You will make individual decisions at your computer. From now on, please do not talk with other participants until the end of the experiment.

In the experiment, you will be anonymously paired with another participant to form a group of two. The experiment consists of 30 repetitions, called periods. You will stay in the same group with the same other participant during all 30 periods. In each of the periods, you will be in the same decision situation.

A period consists of two decision stages. We start by describing the second stage. In this stage, each participant has to choose an effort, which is an integer number between 0 and 100. The effort incurs a cost measured in Experimental Currency Units (ECU). The effort cost is equal to the square of the chosen effort divided by 10. Table 1 below shows the cost of each effort level between 1 and 100. Zero effort implies zero cost.

In the first stage of each period, you have to choose between two modes of remuneration: a private remuneration mode and a joint remuneration mode. The remuneration mode will determine how you will be compensated for your effort.

- If you choose the private remuneration mode, you will be paid 9 ECU per effort unit that you individually choose in the second stage. The other group member will be paid 9 ECU per effort unit that he or she chooses in the second stage.
- If both you and the anonymous other group member choose the joint remuneration mode, each of you will be paid based on the average effort in your group in the second stage. Each of you will be paid 10 ECU per unit of the average effort by you and the other group member.
- If you choose the joint remuneration mode, but the anonymous other group member chooses the private remuneration mode, you will both adhere to the private remuneration mode. You will be paid 9 ECU per effort unit that you individually choose in the second stage. The other group member will be paid 9 ECU per effort unit that he or she chooses in the second stage.

## Your Earnings

Your profit (in ECU) in a period is determined as follows.

- If you are in the private remuneration mode, your profit is determined by your individual effort multiplied by 9 ECU minus the cost of your individual effort in ECU. Below you find Table 2 that shows for each level of individual effort the corresponding cost and the profit under private remuneration.

- If you are in the joint remuneration mode, your profit is determined by the average effort by you and the other group member, multiplied by 10 ECU, minus the cost of your individual effort in ECU.

Your total profit for the experiment equals the sum of your profits over the 30 periods. At the end of the experiment, your total profit will be converted to Canadian dollars with a conversion rate of 25 cents per 100 ECU.

### **Available Information**

At the end of the first stage of each period, you are told whether you are in private or joint remuneration mode.

At the beginning of each period (except for the first one), you are informed of your result in the previous period. This includes the remuneration mode that you chose, the remuneration mode that the other chose, the effective remuneration mode, your individual effort, the average effort in the joint remuneration mode (if applicable), your effort cost, your profit and your cumulated profit over all previous periods.

At any time, by clicking on the magnifying glass icon on your screen, you can access a table of your results in all previous periods. The table shows the results of the first period in the top line and the results of subsequent periods underneath.

Before we begin the experiment, we ask you to answer some comprehension questions regarding these instructions. Everybody must answer all of the questions correctly before we carry on.

**Table 1.** Individual effort cost.

| <b>Effort level</b> | <b>Effort cost</b> | <b>Effort level</b> | <b>Effort cost</b> |
|---------------------|--------------------|---------------------|--------------------|
| 1                   | 0,10               | 51                  | 260,10             |
| 2                   | 0,40               | 52                  | 270,40             |
| 3                   | 0,90               | 53                  | 280,90             |
| 4                   | 1,60               | 54                  | 291,60             |
| 5                   | 2,50               | 55                  | 302,50             |
| 6                   | 3,60               | 56                  | 313,60             |
| 7                   | 4,90               | 57                  | 324,90             |
| 8                   | 6,40               | 58                  | 336,40             |
| 9                   | 8,10               | 59                  | 348,10             |
| 10                  | 10,00              | 60                  | 360,00             |
| 11                  | 12,10              | 61                  | 372,10             |
| 12                  | 14,40              | 62                  | 384,40             |
| 13                  | 16,90              | 63                  | 396,90             |
| 14                  | 19,60              | 64                  | 409,60             |
| 15                  | 22,50              | 65                  | 422,50             |
| 16                  | 25,60              | 66                  | 435,60             |
| 17                  | 28,90              | 67                  | 448,90             |
| 18                  | 32,40              | 68                  | 462,40             |
| 19                  | 36,10              | 69                  | 476,10             |
| 20                  | 40,00              | 70                  | 490,00             |
| 21                  | 44,10              | 71                  | 504,10             |
| 22                  | 48,40              | 72                  | 518,40             |
| 23                  | 52,90              | 73                  | 532,90             |
| 24                  | 57,60              | 74                  | 547,60             |
| 25                  | 62,50              | 75                  | 562,50             |
| 26                  | 67,60              | 76                  | 577,60             |
| 27                  | 72,90              | 77                  | 592,90             |
| 28                  | 78,40              | 78                  | 608,40             |
| 29                  | 84,10              | 79                  | 624,10             |
| 30                  | 90,00              | 80                  | 640,00             |
| 31                  | 96,10              | 81                  | 656,10             |
| 32                  | 102,40             | 82                  | 672,40             |
| 33                  | 108,90             | 83                  | 688,90             |
| 34                  | 115,60             | 84                  | 705,60             |
| 35                  | 122,50             | 85                  | 722,50             |
| 36                  | 129,60             | 86                  | 739,60             |
| 37                  | 136,90             | 87                  | 756,90             |
| 38                  | 144,40             | 88                  | 774,40             |
| 39                  | 152,10             | 89                  | 792,10             |
| 40                  | 160,00             | 90                  | 810,00             |
| 41                  | 168,10             | 91                  | 828,10             |
| 42                  | 176,40             | 92                  | 846,40             |
| 43                  | 184,90             | 93                  | 864,90             |
| 44                  | 193,60             | 94                  | 883,60             |
| 45                  | 202,50             | 95                  | 902,50             |
| 46                  | 211,60             | 96                  | 921,60             |
| 47                  | 220,90             | 97                  | 940,90             |
| 48                  | 230,40             | 98                  | 960,40             |
| 49                  | 240,10             | 99                  | 980,10             |
| 50                  | 250,00             | 100                 | 1000,00            |

**Table 2.** Profit in the private mode.

| Effort level | Effort cost | Profit | Effort level | Effort cost | Profit  |
|--------------|-------------|--------|--------------|-------------|---------|
| 1            | 0,10        | 8,90   | 51           | 260,10      | 198,90  |
| 2            | 0,40        | 17,60  | 52           | 270,40      | 197,60  |
| 3            | 0,90        | 26,10  | 53           | 280,90      | 196,10  |
| 4            | 1,60        | 34,40  | 54           | 291,60      | 194,40  |
| 5            | 2,50        | 42,50  | 55           | 302,50      | 192,50  |
| 6            | 3,60        | 50,40  | 56           | 313,60      | 190,40  |
| 7            | 4,90        | 58,10  | 57           | 324,90      | 188,10  |
| 8            | 6,40        | 65,60  | 58           | 336,40      | 185,60  |
| 9            | 8,10        | 72,90  | 59           | 348,10      | 182,90  |
| 10           | 10,00       | 80,00  | 60           | 360,00      | 180,00  |
| 11           | 12,10       | 86,90  | 61           | 372,10      | 176,90  |
| 12           | 14,40       | 93,60  | 62           | 384,40      | 173,60  |
| 13           | 16,90       | 100,10 | 63           | 396,90      | 170,10  |
| 14           | 19,60       | 106,40 | 64           | 409,60      | 166,40  |
| 15           | 22,50       | 112,50 | 65           | 422,50      | 162,50  |
| 16           | 25,60       | 118,40 | 66           | 435,60      | 158,40  |
| 17           | 28,90       | 124,10 | 67           | 448,90      | 154,10  |
| 18           | 32,40       | 129,60 | 68           | 462,40      | 149,60  |
| 19           | 36,10       | 134,90 | 69           | 476,10      | 144,90  |
| 20           | 40,00       | 140,00 | 70           | 490,00      | 140,00  |
| 21           | 44,10       | 144,90 | 71           | 504,10      | 134,90  |
| 22           | 48,40       | 149,60 | 72           | 518,40      | 129,60  |
| 23           | 52,90       | 154,10 | 73           | 532,90      | 124,10  |
| 24           | 57,60       | 158,40 | 74           | 547,60      | 118,40  |
| 25           | 62,50       | 162,50 | 75           | 562,50      | 112,50  |
| 26           | 67,60       | 166,40 | 76           | 577,60      | 106,40  |
| 27           | 72,90       | 170,10 | 77           | 592,90      | 100,10  |
| 28           | 78,40       | 173,60 | 78           | 608,40      | 93,60   |
| 29           | 84,10       | 176,90 | 79           | 624,10      | 86,90   |
| 30           | 90,00       | 180,00 | 80           | 640,00      | 80,00   |
| 31           | 96,10       | 182,90 | 81           | 656,10      | 72,90   |
| 32           | 102,40      | 185,60 | 82           | 672,40      | 65,60   |
| 33           | 108,90      | 188,10 | 83           | 688,90      | 58,10   |
| 34           | 115,60      | 190,40 | 84           | 705,60      | 50,40   |
| 35           | 122,50      | 192,50 | 85           | 722,50      | 42,50   |
| 36           | 129,60      | 194,40 | 86           | 739,60      | 34,40   |
| 37           | 136,90      | 196,10 | 87           | 756,90      | 26,10   |
| 38           | 144,40      | 197,60 | 88           | 774,40      | 17,60   |
| 39           | 152,10      | 198,90 | 89           | 792,10      | 8,90    |
| 40           | 160,00      | 200,00 | 90           | 810,00      | 0,00    |
| 41           | 168,10      | 200,90 | 91           | 828,10      | -9,10   |
| 42           | 176,40      | 201,60 | 92           | 846,40      | -18,40  |
| 43           | 184,90      | 202,10 | 93           | 864,90      | -27,90  |
| 44           | 193,60      | 202,40 | 94           | 883,60      | -37,60  |
| 45           | 202,50      | 202,50 | 95           | 902,50      | -47,50  |
| 46           | 211,60      | 202,40 | 96           | 921,60      | -57,60  |
| 47           | 220,90      | 202,10 | 97           | 940,90      | -67,90  |
| 48           | 230,40      | 201,60 | 98           | 960,40      | -78,40  |
| 49           | 240,10      | 200,90 | 99           | 980,10      | -89,10  |
| 50           | 250,00      | 200,00 | 100          | 1000,00     | -100,00 |

## Data for VOLUNTARY SYM

| Player | Group | Period | Session | Choice team | Other choice team | Teaming mode | Effort | Other effort | Avg. effort team | Remuneration | Cost  | Profit | Cum. profit |
|--------|-------|--------|---------|-------------|-------------------|--------------|--------|--------------|------------------|--------------|-------|--------|-------------|
| 1      | 1     | 1      | 1       | 1           | 1                 | 1            | 25     | 46           | 35.5             | 355.0        | 62.5  | 292.5  | 292.5       |
| 1      | 1     | 2      | 1       | 0           | 1                 | 0            | 34     | 42           | 0.0              | 306.0        | 115.6 | 190.4  | 482.9       |
| 1      | 1     | 3      | 1       | 1           | 1                 | 1            | 30     | 35           | 32.5             | 325.0        | 90.0  | 235.0  | 717.9       |
| 1      | 1     | 4      | 1       | 1           | 1                 | 1            | 30     | 30           | 30.0             | 300.0        | 90.0  | 210.0  | 927.9       |
| 1      | 1     | 5      | 1       | 1           | 1                 | 1            | 31     | 20           | 25.5             | 255.0        | 96.1  | 158.9  | 1086.8      |
| 1      | 1     | 6      | 1       | 1           | 1                 | 1            | 26     | 8            | 17.0             | 170.0        | 67.6  | 102.4  | 1189.2      |
| 1      | 1     | 7      | 1       | 1           | 1                 | 1            | 27     | 10           | 18.5             | 185.0        | 72.9  | 112.1  | 1301.3      |
| 1      | 1     | 8      | 1       | 1           | 1                 | 1            | 44     | 20           | 32.0             | 320.0        | 193.6 | 126.4  | 1427.7      |
| 1      | 1     | 9      | 1       | 1           | 1                 | 1            | 44     | 20           | 32.0             | 320.0        | 193.6 | 126.4  | 1554.1      |
| 1      | 1     | 10     | 1       | 1           | 1                 | 1            | 50     | 20           | 35.0             | 350.0        | 250.0 | 100.0  | 1654.1      |
| 1      | 1     | 11     | 1       | 0           | 1                 | 0            | 49     | 23           | 0.0              | 441.0        | 240.1 | 200.9  | 1855.0      |
| 1      | 1     | 12     | 1       | 0           | 1                 | 0            | 49     | 23           | 0.0              | 441.0        | 240.1 | 200.9  | 2055.9      |
| 1      | 1     | 13     | 1       | 0           | 1                 | 0            | 49     | 23           | 0.0              | 441.0        | 240.1 | 200.9  | 2256.8      |
| 1      | 1     | 14     | 1       | 1           | 1                 | 1            | 49     | 20           | 34.5             | 345.0        | 240.1 | 104.9  | 2361.7      |
| 1      | 1     | 15     | 1       | 0           | 1                 | 0            | 49     | 23           | 0.0              | 441.0        | 240.1 | 200.9  | 2562.6      |
| 1      | 1     | 16     | 1       | 1           | 1                 | 1            | 34     | 20           | 27.0             | 270.0        | 115.6 | 154.4  | 2717.0      |
| 1      | 1     | 17     | 1       | 0           | 1                 | 0            | 34     | 63           | 0.0              | 306.0        | 115.6 | 190.4  | 2907.4      |
| 1      | 1     | 18     | 1       | 1           | 1                 | 1            | 50     | 10           | 30.0             | 300.0        | 250.0 | 50.0   | 2957.4      |
| 1      | 1     | 19     | 1       | 1           | 1                 | 1            | 30     | 10           | 20.0             | 200.0        | 90.0  | 110.0  | 3067.4      |
| 1      | 1     | 20     | 1       | 1           | 1                 | 1            | 31     | 20           | 25.5             | 255.0        | 96.1  | 158.9  | 3226.3      |
| 1      | 1     | 21     | 1       | 0           | 1                 | 0            | 49     | 23           | 0.0              | 441.0        | 240.1 | 200.9  | 3427.2      |
| 1      | 1     | 22     | 1       | 0           | 1                 | 0            | 49     | 23           | 0.0              | 441.0        | 240.1 | 200.9  | 3628.1      |
| 1      | 1     | 23     | 1       | 0           | 1                 | 0            | 49     | 45           | 0.0              | 441.0        | 240.1 | 200.9  | 3829.0      |
| 1      | 1     | 24     | 1       | 1           | 1                 | 1            | 34     | 30           | 32.0             | 320.0        | 115.6 | 204.4  | 4033.4      |
| 1      | 1     | 25     | 1       | 1           | 1                 | 1            | 34     | 35           | 34.5             | 345.0        | 115.6 | 229.4  | 4262.8      |
| 1      | 1     | 26     | 1       | 1           | 1                 | 1            | 31     | 30           | 30.5             | 305.0        | 96.1  | 208.9  | 4471.7      |
| 1      | 1     | 27     | 1       | 1           | 1                 | 1            | 35     | 20           | 27.5             | 275.0        | 122.5 | 152.5  | 4624.2      |
| 1      | 1     | 28     | 1       | 1           | 1                 | 1            | 34     | 17           | 25.5             | 255.0        | 115.6 | 139.4  | 4763.6      |
| 1      | 1     | 29     | 1       | 1           | 1                 | 1            | 33     | 17           | 25.0             | 250.0        | 108.9 | 141.1  | 4904.7      |
| 1      | 1     | 30     | 1       | 1           | 1                 | 1            | 34     | 19           | 26.5             | 265.0        | 115.6 | 149.4  | 5054.1      |
| 8      | 1     | 1      | 1       | 1           | 1                 | 1            | 46     | 25           | 35.5             | 355.0        | 211.6 | 143.4  | 143.4       |
| 8      | 1     | 2      | 1       | 1           | 0                 | 0            | 42     | 34           | 0.0              | 378.0        | 176.4 | 201.6  | 345.0       |
| 8      | 1     | 3      | 1       | 1           | 1                 | 1            | 35     | 30           | 32.5             | 325.0        | 122.5 | 202.5  | 547.5       |
| 8      | 1     | 4      | 1       | 1           | 1                 | 1            | 30     | 30           | 30.0             | 300.0        | 90.0  | 210.0  | 757.5       |

|   |   |    |   |   |   |   |    |    |      |       |       |       |        |
|---|---|----|---|---|---|---|----|----|------|-------|-------|-------|--------|
| 8 | 1 | 5  | 1 | 1 | 1 | 1 | 20 | 31 | 25.5 | 255.0 | 40.0  | 215.0 | 972.5  |
| 8 | 1 | 6  | 1 | 1 | 1 | 1 | 8  | 26 | 17.0 | 170.0 | 6.4   | 163.6 | 1136.1 |
| 8 | 1 | 7  | 1 | 1 | 1 | 1 | 10 | 27 | 18.5 | 185.0 | 10.0  | 175.0 | 1311.1 |
| 8 | 1 | 8  | 1 | 1 | 1 | 1 | 20 | 44 | 32.0 | 320.0 | 40.0  | 280.0 | 1591.1 |
| 8 | 1 | 9  | 1 | 1 | 1 | 1 | 20 | 44 | 32.0 | 320.0 | 40.0  | 280.0 | 1871.1 |
| 8 | 1 | 10 | 1 | 1 | 1 | 1 | 20 | 50 | 35.0 | 350.0 | 40.0  | 310.0 | 2181.1 |
| 8 | 1 | 11 | 1 | 1 | 0 | 0 | 23 | 49 | 0.0  | 207.0 | 52.9  | 154.1 | 2335.2 |
| 8 | 1 | 12 | 1 | 1 | 0 | 0 | 23 | 49 | 0.0  | 207.0 | 52.9  | 154.1 | 2489.3 |
| 8 | 1 | 13 | 1 | 1 | 0 | 0 | 23 | 49 | 0.0  | 207.0 | 52.9  | 154.1 | 2643.4 |
| 8 | 1 | 14 | 1 | 1 | 1 | 1 | 20 | 49 | 34.5 | 345.0 | 40.0  | 305.0 | 2948.4 |
| 8 | 1 | 15 | 1 | 1 | 0 | 0 | 23 | 49 | 0.0  | 207.0 | 52.9  | 154.1 | 3102.5 |
| 8 | 1 | 16 | 1 | 1 | 1 | 1 | 20 | 34 | 27.0 | 270.0 | 40.0  | 230.0 | 3332.5 |
| 8 | 1 | 17 | 1 | 1 | 0 | 0 | 63 | 34 | 0.0  | 567.0 | 396.9 | 170.1 | 3502.6 |
| 8 | 1 | 18 | 1 | 1 | 1 | 1 | 10 | 50 | 30.0 | 300.0 | 10.0  | 290.0 | 3792.6 |
| 8 | 1 | 19 | 1 | 1 | 1 | 1 | 10 | 30 | 20.0 | 200.0 | 10.0  | 190.0 | 3982.6 |
| 8 | 1 | 20 | 1 | 1 | 1 | 1 | 20 | 31 | 25.5 | 255.0 | 40.0  | 215.0 | 4197.6 |
| 8 | 1 | 21 | 1 | 1 | 0 | 0 | 23 | 49 | 0.0  | 207.0 | 52.9  | 154.1 | 4351.7 |
| 8 | 1 | 22 | 1 | 1 | 0 | 0 | 23 | 49 | 0.0  | 207.0 | 52.9  | 154.1 | 4505.8 |
| 8 | 1 | 23 | 1 | 1 | 0 | 0 | 45 | 49 | 0.0  | 405.0 | 202.5 | 202.5 | 4708.3 |
| 8 | 1 | 24 | 1 | 1 | 1 | 1 | 30 | 34 | 32.0 | 320.0 | 90.0  | 230.0 | 4938.3 |
| 8 | 1 | 25 | 1 | 1 | 1 | 1 | 35 | 34 | 34.5 | 345.0 | 122.5 | 222.5 | 5160.8 |
| 8 | 1 | 26 | 1 | 1 | 1 | 1 | 30 | 31 | 30.5 | 305.0 | 90.0  | 215.0 | 5375.8 |
| 8 | 1 | 27 | 1 | 1 | 1 | 1 | 20 | 35 | 27.5 | 275.0 | 40.0  | 235.0 | 5610.8 |
| 8 | 1 | 28 | 1 | 1 | 1 | 1 | 17 | 34 | 25.5 | 255.0 | 28.9  | 226.1 | 5836.9 |
| 8 | 1 | 29 | 1 | 1 | 1 | 1 | 17 | 33 | 25.0 | 250.0 | 28.9  | 221.1 | 6058.0 |
| 8 | 1 | 30 | 1 | 1 | 1 | 1 | 19 | 34 | 26.5 | 265.0 | 36.1  | 228.9 | 6286.9 |
| 2 | 2 | 1  | 1 | 1 | 0 | 0 | 70 | 50 | 0.0  | 630.0 | 490.0 | 140.0 | 140.0  |
| 2 | 2 | 2  | 1 | 1 | 1 | 1 | 80 | 50 | 65.0 | 650.0 | 640.0 | 10.0  | 150.0  |
| 2 | 2 | 3  | 1 | 0 | 1 | 0 | 90 | 70 | 0.0  | 810.0 | 810.0 | 0.0   | 150.0  |
| 2 | 2 | 4  | 1 | 1 | 1 | 1 | 60 | 50 | 55.0 | 550.0 | 360.0 | 190.0 | 340.0  |
| 2 | 2 | 5  | 1 | 1 | 1 | 1 | 57 | 60 | 58.5 | 585.0 | 324.9 | 260.1 | 600.1  |
| 2 | 2 | 6  | 1 | 1 | 1 | 1 | 70 | 60 | 65.0 | 650.0 | 490.0 | 160.0 | 760.1  |
| 2 | 2 | 7  | 1 | 1 | 1 | 1 | 40 | 67 | 53.5 | 535.0 | 160.0 | 375.0 | 1135.1 |
| 2 | 2 | 8  | 1 | 1 | 1 | 1 | 50 | 60 | 55.0 | 550.0 | 250.0 | 300.0 | 1435.1 |
| 2 | 2 | 9  | 1 | 1 | 1 | 1 | 45 | 60 | 52.5 | 525.0 | 202.5 | 322.5 | 1757.6 |
| 2 | 2 | 10 | 1 | 1 | 1 | 1 | 45 | 60 | 52.5 | 525.0 | 202.5 | 322.5 | 2080.1 |
| 2 | 2 | 11 | 1 | 1 | 1 | 1 | 48 | 60 | 54.0 | 540.0 | 230.4 | 309.6 | 2389.7 |
| 2 | 2 | 12 | 1 | 1 | 1 | 1 | 60 | 60 | 60.0 | 600.0 | 360.0 | 240.0 | 2629.7 |

|   |   |    |   |   |   |   |    |    |      |       |       |       |        |
|---|---|----|---|---|---|---|----|----|------|-------|-------|-------|--------|
| 2 | 2 | 13 | 1 | 1 | 1 | 1 | 65 | 65 | 65.0 | 650.0 | 422.5 | 227.5 | 2857.2 |
| 2 | 2 | 14 | 1 | 1 | 1 | 1 | 40 | 70 | 55.0 | 550.0 | 160.0 | 390.0 | 3247.2 |
| 2 | 2 | 15 | 1 | 1 | 1 | 1 | 35 | 60 | 47.5 | 475.0 | 122.5 | 352.5 | 3599.7 |
| 2 | 2 | 16 | 1 | 1 | 1 | 1 | 44 | 50 | 47.0 | 470.0 | 193.6 | 276.4 | 3876.1 |
| 2 | 2 | 17 | 1 | 1 | 1 | 1 | 47 | 50 | 48.5 | 485.0 | 220.9 | 264.1 | 4140.2 |
| 2 | 2 | 18 | 1 | 1 | 1 | 1 | 51 | 50 | 50.5 | 505.0 | 260.1 | 244.9 | 4385.1 |
| 2 | 2 | 19 | 1 | 0 | 1 | 0 | 60 | 55 | 0.0  | 540.0 | 360.0 | 180.0 | 4565.1 |
| 2 | 2 | 20 | 1 | 1 | 0 | 0 | 70 | 53 | 0.0  | 630.0 | 490.0 | 140.0 | 4705.1 |
| 2 | 2 | 21 | 1 | 1 | 0 | 0 | 30 | 56 | 0.0  | 270.0 | 90.0  | 180.0 | 4885.1 |
| 2 | 2 | 22 | 1 | 0 | 1 | 0 | 20 | 48 | 0.0  | 180.0 | 40.0  | 140.0 | 5025.1 |
| 2 | 2 | 23 | 1 | 1 | 1 | 1 | 60 | 45 | 52.5 | 525.0 | 360.0 | 165.0 | 5190.1 |
| 2 | 2 | 24 | 1 | 1 | 1 | 1 | 45 | 50 | 47.5 | 475.0 | 202.5 | 272.5 | 5462.6 |
| 2 | 2 | 25 | 1 | 1 | 1 | 1 | 50 | 50 | 50.0 | 500.0 | 250.0 | 250.0 | 5712.6 |
| 2 | 2 | 26 | 1 | 1 | 1 | 1 | 40 | 20 | 30.0 | 300.0 | 160.0 | 140.0 | 5852.6 |
| 2 | 2 | 27 | 1 | 1 | 1 | 1 | 10 | 30 | 20.0 | 200.0 | 10.0  | 190.0 | 6042.6 |
| 2 | 2 | 28 | 1 | 1 | 0 | 0 | 25 | 40 | 0.0  | 225.0 | 62.5  | 162.5 | 6205.1 |
| 2 | 2 | 29 | 1 | 1 | 0 | 0 | 60 | 35 | 0.0  | 540.0 | 360.0 | 180.0 | 6385.1 |
| 2 | 2 | 30 | 1 | 0 | 0 | 0 | 90 | 45 | 0.0  | 810.0 | 810.0 | 0.0   | 6385.1 |
| 7 | 2 | 1  | 1 | 0 | 1 | 0 | 50 | 70 | 0.0  | 450.0 | 250.0 | 200.0 | 200.0  |
| 7 | 2 | 2  | 1 | 1 | 1 | 1 | 50 | 80 | 65.0 | 650.0 | 250.0 | 400.0 | 600.0  |
| 7 | 2 | 3  | 1 | 1 | 0 | 0 | 70 | 90 | 0.0  | 630.0 | 490.0 | 140.0 | 740.0  |
| 7 | 2 | 4  | 1 | 1 | 1 | 1 | 50 | 60 | 55.0 | 550.0 | 250.0 | 300.0 | 1040.0 |
| 7 | 2 | 5  | 1 | 1 | 1 | 1 | 60 | 57 | 58.5 | 585.0 | 360.0 | 225.0 | 1265.0 |
| 7 | 2 | 6  | 1 | 1 | 1 | 1 | 60 | 70 | 65.0 | 650.0 | 360.0 | 290.0 | 1555.0 |
| 7 | 2 | 7  | 1 | 1 | 1 | 1 | 67 | 40 | 53.5 | 535.0 | 448.9 | 86.1  | 1641.1 |
| 7 | 2 | 8  | 1 | 1 | 1 | 1 | 60 | 50 | 55.0 | 550.0 | 360.0 | 190.0 | 1831.1 |
| 7 | 2 | 9  | 1 | 1 | 1 | 1 | 60 | 45 | 52.5 | 525.0 | 360.0 | 165.0 | 1996.1 |
| 7 | 2 | 10 | 1 | 1 | 1 | 1 | 60 | 45 | 52.5 | 525.0 | 360.0 | 165.0 | 2161.1 |
| 7 | 2 | 11 | 1 | 1 | 1 | 1 | 60 | 48 | 54.0 | 540.0 | 360.0 | 180.0 | 2341.1 |
| 7 | 2 | 12 | 1 | 1 | 1 | 1 | 60 | 60 | 60.0 | 600.0 | 360.0 | 240.0 | 2581.1 |
| 7 | 2 | 13 | 1 | 1 | 1 | 1 | 65 | 65 | 65.0 | 650.0 | 422.5 | 227.5 | 2808.6 |
| 7 | 2 | 14 | 1 | 1 | 1 | 1 | 70 | 40 | 55.0 | 550.0 | 490.0 | 60.0  | 2868.6 |
| 7 | 2 | 15 | 1 | 1 | 1 | 1 | 60 | 35 | 47.5 | 475.0 | 360.0 | 115.0 | 2983.6 |
| 7 | 2 | 16 | 1 | 1 | 1 | 1 | 50 | 44 | 47.0 | 470.0 | 250.0 | 220.0 | 3203.6 |
| 7 | 2 | 17 | 1 | 1 | 1 | 1 | 50 | 47 | 48.5 | 485.0 | 250.0 | 235.0 | 3438.6 |
| 7 | 2 | 18 | 1 | 1 | 1 | 1 | 50 | 51 | 50.5 | 505.0 | 250.0 | 255.0 | 3693.6 |
| 7 | 2 | 19 | 1 | 1 | 0 | 0 | 55 | 60 | 0.0  | 495.0 | 302.5 | 192.5 | 3886.1 |
| 7 | 2 | 20 | 1 | 0 | 1 | 0 | 53 | 70 | 0.0  | 477.0 | 280.9 | 196.1 | 4082.2 |

|   |   |    |   |   |   |   |    |    |      |       |       |       |        |
|---|---|----|---|---|---|---|----|----|------|-------|-------|-------|--------|
| 7 | 2 | 21 | 1 | 0 | 1 | 0 | 56 | 30 | 0.0  | 504.0 | 313.6 | 190.4 | 4272.6 |
| 7 | 2 | 22 | 1 | 1 | 0 | 0 | 48 | 20 | 0.0  | 432.0 | 230.4 | 201.6 | 4474.2 |
| 7 | 2 | 23 | 1 | 1 | 1 | 1 | 45 | 60 | 52.5 | 525.0 | 202.5 | 322.5 | 4796.7 |
| 7 | 2 | 24 | 1 | 1 | 1 | 1 | 50 | 45 | 47.5 | 475.0 | 250.0 | 225.0 | 5021.7 |
| 7 | 2 | 25 | 1 | 1 | 1 | 1 | 50 | 50 | 50.0 | 500.0 | 250.0 | 250.0 | 5271.7 |
| 7 | 2 | 26 | 1 | 1 | 1 | 1 | 20 | 40 | 30.0 | 300.0 | 40.0  | 260.0 | 5531.7 |
| 7 | 2 | 27 | 1 | 1 | 1 | 1 | 30 | 10 | 20.0 | 200.0 | 90.0  | 110.0 | 5641.7 |
| 7 | 2 | 28 | 1 | 0 | 1 | 0 | 40 | 25 | 0.0  | 360.0 | 160.0 | 200.0 | 5841.7 |
| 7 | 2 | 29 | 1 | 0 | 1 | 0 | 35 | 60 | 0.0  | 315.0 | 122.5 | 192.5 | 6034.2 |
| 7 | 2 | 30 | 1 | 0 | 0 | 0 | 45 | 90 | 0.0  | 405.0 | 202.5 | 202.5 | 6236.7 |
| 3 | 3 | 1  | 1 | 1 | 0 | 0 | 45 | 45 | 0.0  | 405.0 | 202.5 | 202.5 | 202.5  |
| 3 | 3 | 2  | 1 | 1 | 1 | 1 | 45 | 45 | 45.0 | 450.0 | 202.5 | 247.5 | 450.0  |
| 3 | 3 | 3  | 1 | 1 | 1 | 1 | 50 | 45 | 47.5 | 475.0 | 250.0 | 225.0 | 675.0  |
| 3 | 3 | 4  | 1 | 1 | 1 | 1 | 45 | 45 | 45.0 | 450.0 | 202.5 | 247.5 | 922.5  |
| 3 | 3 | 5  | 1 | 1 | 1 | 1 | 45 | 45 | 45.0 | 450.0 | 202.5 | 247.5 | 1170.0 |
| 3 | 3 | 6  | 1 | 1 | 1 | 1 | 45 | 45 | 45.0 | 450.0 | 202.5 | 247.5 | 1417.5 |
| 3 | 3 | 7  | 1 | 1 | 1 | 1 | 45 | 45 | 45.0 | 450.0 | 202.5 | 247.5 | 1665.0 |
| 3 | 3 | 8  | 1 | 1 | 1 | 1 | 45 | 45 | 45.0 | 450.0 | 202.5 | 247.5 | 1912.5 |
| 3 | 3 | 9  | 1 | 1 | 1 | 1 | 45 | 45 | 45.0 | 450.0 | 202.5 | 247.5 | 2160.0 |
| 3 | 3 | 10 | 1 | 1 | 1 | 1 | 45 | 45 | 45.0 | 450.0 | 202.5 | 247.5 | 2407.5 |
| 3 | 3 | 11 | 1 | 1 | 1 | 1 | 45 | 45 | 45.0 | 450.0 | 202.5 | 247.5 | 2655.0 |
| 3 | 3 | 12 | 1 | 1 | 1 | 1 | 45 | 45 | 45.0 | 450.0 | 202.5 | 247.5 | 2902.5 |
| 3 | 3 | 13 | 1 | 1 | 1 | 1 | 45 | 45 | 45.0 | 450.0 | 202.5 | 247.5 | 3150.0 |
| 3 | 3 | 14 | 1 | 1 | 1 | 1 | 45 | 45 | 45.0 | 450.0 | 202.5 | 247.5 | 3397.5 |
| 3 | 3 | 15 | 1 | 1 | 1 | 1 | 46 | 45 | 45.5 | 455.0 | 211.6 | 243.4 | 3640.9 |
| 3 | 3 | 16 | 1 | 1 | 1 | 1 | 45 | 45 | 45.0 | 450.0 | 202.5 | 247.5 | 3888.4 |
| 3 | 3 | 17 | 1 | 1 | 1 | 1 | 45 | 45 | 45.0 | 450.0 | 202.5 | 247.5 | 4135.9 |
| 3 | 3 | 18 | 1 | 1 | 1 | 1 | 45 | 45 | 45.0 | 450.0 | 202.5 | 247.5 | 4383.4 |
| 3 | 3 | 19 | 1 | 1 | 1 | 1 | 45 | 45 | 45.0 | 450.0 | 202.5 | 247.5 | 4630.9 |
| 3 | 3 | 20 | 1 | 1 | 1 | 1 | 45 | 45 | 45.0 | 450.0 | 202.5 | 247.5 | 4878.4 |
| 3 | 3 | 21 | 1 | 1 | 1 | 1 | 45 | 45 | 45.0 | 450.0 | 202.5 | 247.5 | 5125.9 |
| 3 | 3 | 22 | 1 | 1 | 1 | 1 | 45 | 45 | 45.0 | 450.0 | 202.5 | 247.5 | 5373.4 |
| 3 | 3 | 23 | 1 | 1 | 1 | 1 | 44 | 45 | 44.5 | 445.0 | 193.6 | 251.4 | 5624.8 |
| 3 | 3 | 24 | 1 | 1 | 1 | 1 | 45 | 45 | 45.0 | 450.0 | 202.5 | 247.5 | 5872.3 |
| 3 | 3 | 25 | 1 | 1 | 1 | 1 | 44 | 45 | 44.5 | 445.0 | 193.6 | 251.4 | 6123.7 |
| 3 | 3 | 26 | 1 | 1 | 1 | 1 | 44 | 44 | 44.0 | 440.0 | 193.6 | 246.4 | 6370.1 |
| 3 | 3 | 27 | 1 | 1 | 1 | 1 | 44 | 45 | 44.5 | 445.0 | 193.6 | 251.4 | 6621.5 |
| 3 | 3 | 28 | 1 | 1 | 1 | 1 | 44 | 45 | 44.5 | 445.0 | 193.6 | 251.4 | 6872.9 |



|   |   |    |   |   |   |   |    |    |      |       |       |       |        |
|---|---|----|---|---|---|---|----|----|------|-------|-------|-------|--------|
| 3 | 3 | 29 | 1 | 1 | 1 | 1 | 45 | 44 | 44.5 | 445.0 | 202.5 | 242.5 | 7115.4 |
| 3 | 3 | 30 | 1 | 1 | 1 | 1 | 45 | 44 | 44.5 | 445.0 | 202.5 | 242.5 | 7357.9 |
| 6 | 3 | 1  | 1 | 0 | 1 | 0 | 45 | 45 | 0.0  | 405.0 | 202.5 | 202.5 | 202.5  |
| 6 | 3 | 2  | 1 | 1 | 1 | 1 | 45 | 45 | 45.0 | 450.0 | 202.5 | 247.5 | 450.0  |
| 6 | 3 | 3  | 1 | 1 | 1 | 1 | 45 | 50 | 47.5 | 475.0 | 202.5 | 272.5 | 722.5  |
| 6 | 3 | 4  | 1 | 1 | 1 | 1 | 45 | 45 | 45.0 | 450.0 | 202.5 | 247.5 | 970.0  |
| 6 | 3 | 5  | 1 | 1 | 1 | 1 | 45 | 45 | 45.0 | 450.0 | 202.5 | 247.5 | 1217.5 |
| 6 | 3 | 6  | 1 | 1 | 1 | 1 | 45 | 45 | 45.0 | 450.0 | 202.5 | 247.5 | 1465.0 |
| 6 | 3 | 7  | 1 | 1 | 1 | 1 | 45 | 45 | 45.0 | 450.0 | 202.5 | 247.5 | 1712.5 |
| 6 | 3 | 8  | 1 | 1 | 1 | 1 | 45 | 45 | 45.0 | 450.0 | 202.5 | 247.5 | 1960.0 |
| 6 | 3 | 9  | 1 | 1 | 1 | 1 | 45 | 45 | 45.0 | 450.0 | 202.5 | 247.5 | 2207.5 |
| 6 | 3 | 10 | 1 | 1 | 1 | 1 | 45 | 45 | 45.0 | 450.0 | 202.5 | 247.5 | 2455.0 |
| 6 | 3 | 11 | 1 | 1 | 1 | 1 | 45 | 45 | 45.0 | 450.0 | 202.5 | 247.5 | 2702.5 |
| 6 | 3 | 12 | 1 | 1 | 1 | 1 | 45 | 45 | 45.0 | 450.0 | 202.5 | 247.5 | 2950.0 |
| 6 | 3 | 13 | 1 | 1 | 1 | 1 | 45 | 45 | 45.0 | 450.0 | 202.5 | 247.5 | 3197.5 |
| 6 | 3 | 14 | 1 | 1 | 1 | 1 | 45 | 45 | 45.0 | 450.0 | 202.5 | 247.5 | 3445.0 |
| 6 | 3 | 15 | 1 | 1 | 1 | 1 | 45 | 46 | 45.5 | 455.0 | 202.5 | 252.5 | 3697.5 |
| 6 | 3 | 16 | 1 | 1 | 1 | 1 | 45 | 45 | 45.0 | 450.0 | 202.5 | 247.5 | 3945.0 |
| 6 | 3 | 17 | 1 | 1 | 1 | 1 | 45 | 45 | 45.0 | 450.0 | 202.5 | 247.5 | 4192.5 |
| 6 | 3 | 18 | 1 | 1 | 1 | 1 | 45 | 45 | 45.0 | 450.0 | 202.5 | 247.5 | 4440.0 |
| 6 | 3 | 19 | 1 | 1 | 1 | 1 | 45 | 45 | 45.0 | 450.0 | 202.5 | 247.5 | 4687.5 |
| 6 | 3 | 20 | 1 | 1 | 1 | 1 | 45 | 45 | 45.0 | 450.0 | 202.5 | 247.5 | 4935.0 |
| 6 | 3 | 21 | 1 | 1 | 1 | 1 | 45 | 45 | 45.0 | 450.0 | 202.5 | 247.5 | 5182.5 |
| 6 | 3 | 22 | 1 | 1 | 1 | 1 | 45 | 45 | 45.0 | 450.0 | 202.5 | 247.5 | 5430.0 |
| 6 | 3 | 23 | 1 | 1 | 1 | 1 | 45 | 44 | 44.5 | 445.0 | 202.5 | 242.5 | 5672.5 |
| 6 | 3 | 24 | 1 | 1 | 1 | 1 | 45 | 45 | 45.0 | 450.0 | 202.5 | 247.5 | 5920.0 |
| 6 | 3 | 25 | 1 | 1 | 1 | 1 | 45 | 44 | 44.5 | 445.0 | 202.5 | 242.5 | 6162.5 |
| 6 | 3 | 26 | 1 | 1 | 1 | 1 | 44 | 44 | 44.0 | 440.0 | 193.6 | 246.4 | 6408.9 |
| 6 | 3 | 27 | 1 | 1 | 1 | 1 | 45 | 44 | 44.5 | 445.0 | 202.5 | 242.5 | 6651.4 |
| 6 | 3 | 28 | 1 | 1 | 1 | 1 | 45 | 44 | 44.5 | 445.0 | 202.5 | 242.5 | 6893.9 |
| 6 | 3 | 29 | 1 | 1 | 1 | 1 | 44 | 45 | 44.5 | 445.0 | 193.6 | 251.4 | 7145.3 |
| 6 | 3 | 30 | 1 | 1 | 1 | 1 | 44 | 45 | 44.5 | 445.0 | 193.6 | 251.4 | 7396.7 |
| 4 | 4 | 1  | 1 | 1 | 1 | 1 | 50 | 63 | 56.5 | 565.0 | 250.0 | 315.0 | 315.0  |
| 4 | 4 | 2  | 1 | 1 | 0 | 0 | 50 | 58 | 0.0  | 450.0 | 250.0 | 200.0 | 515.0  |
| 4 | 4 | 3  | 1 | 1 | 1 | 1 | 50 | 95 | 72.5 | 725.0 | 250.0 | 475.0 | 990.0  |
| 4 | 4 | 4  | 1 | 1 | 1 | 1 | 60 | 50 | 55.0 | 550.0 | 360.0 | 190.0 | 1180.0 |
| 4 | 4 | 5  | 1 | 1 | 1 | 1 | 50 | 50 | 50.0 | 500.0 | 250.0 | 250.0 | 1430.0 |
| 4 | 4 | 6  | 1 | 1 | 0 | 0 | 50 | 57 | 0.0  | 450.0 | 250.0 | 200.0 | 1630.0 |

|   |   |    |   |   |   |   |    |    |      |       |       |        |        |
|---|---|----|---|---|---|---|----|----|------|-------|-------|--------|--------|
| 4 | 4 | 7  | 1 | 1 | 1 | 1 | 50 | 50 | 50.0 | 500.0 | 250.0 | 250.0  | 1880.0 |
| 4 | 4 | 8  | 1 | 1 | 1 | 1 | 60 | 60 | 60.0 | 600.0 | 360.0 | 240.0  | 2120.0 |
| 4 | 4 | 9  | 1 | 1 | 1 | 1 | 55 | 55 | 55.0 | 550.0 | 302.5 | 247.5  | 2367.5 |
| 4 | 4 | 10 | 1 | 1 | 1 | 1 | 52 | 56 | 54.0 | 540.0 | 270.4 | 269.6  | 2637.1 |
| 4 | 4 | 11 | 1 | 1 | 1 | 1 | 52 | 55 | 53.5 | 535.0 | 270.4 | 264.6  | 2901.7 |
| 4 | 4 | 12 | 1 | 1 | 1 | 1 | 52 | 55 | 53.5 | 535.0 | 270.4 | 264.6  | 3166.3 |
| 4 | 4 | 13 | 1 | 1 | 1 | 1 | 52 | 55 | 53.5 | 535.0 | 270.4 | 264.6  | 3430.9 |
| 4 | 4 | 14 | 1 | 1 | 1 | 1 | 51 | 57 | 54.0 | 540.0 | 260.1 | 279.9  | 3710.8 |
| 4 | 4 | 15 | 1 | 1 | 1 | 1 | 51 | 55 | 53.0 | 530.0 | 260.1 | 269.9  | 3980.7 |
| 4 | 4 | 16 | 1 | 1 | 1 | 1 | 50 | 55 | 52.5 | 525.0 | 250.0 | 275.0  | 4255.7 |
| 4 | 4 | 17 | 1 | 1 | 1 | 1 | 51 | 55 | 53.0 | 530.0 | 260.1 | 269.9  | 4525.6 |
| 4 | 4 | 18 | 1 | 1 | 1 | 1 | 52 | 57 | 54.5 | 545.0 | 270.4 | 274.6  | 4800.2 |
| 4 | 4 | 19 | 1 | 1 | 1 | 1 | 52 | 58 | 55.0 | 550.0 | 270.4 | 279.6  | 5079.8 |
| 4 | 4 | 20 | 1 | 1 | 1 | 1 | 52 | 54 | 53.0 | 530.0 | 270.4 | 259.6  | 5339.4 |
| 4 | 4 | 21 | 1 | 1 | 1 | 1 | 54 | 56 | 55.0 | 550.0 | 291.6 | 258.4  | 5597.8 |
| 4 | 4 | 22 | 1 | 1 | 1 | 1 | 52 | 56 | 54.0 | 540.0 | 270.4 | 269.6  | 5867.4 |
| 4 | 4 | 23 | 1 | 1 | 1 | 1 | 50 | 58 | 54.0 | 540.0 | 250.0 | 290.0  | 6157.4 |
| 4 | 4 | 24 | 1 | 1 | 1 | 1 | 50 | 53 | 51.5 | 515.0 | 250.0 | 265.0  | 6422.4 |
| 4 | 4 | 25 | 1 | 1 | 1 | 1 | 56 | 52 | 54.0 | 540.0 | 313.6 | 226.4  | 6648.8 |
| 4 | 4 | 26 | 1 | 1 | 1 | 1 | 54 | 52 | 53.0 | 530.0 | 291.6 | 238.4  | 6887.2 |
| 4 | 4 | 27 | 1 | 0 | 1 | 0 | 45 | 52 | 0.0  | 405.0 | 202.5 | 202.5  | 7089.7 |
| 4 | 4 | 28 | 1 | 1 | 1 | 1 | 54 | 49 | 51.5 | 515.0 | 291.6 | 223.4  | 7313.1 |
| 4 | 4 | 29 | 1 | 1 | 1 | 1 | 56 | 50 | 53.0 | 530.0 | 313.6 | 216.4  | 7529.5 |
| 4 | 4 | 30 | 1 | 1 | 1 | 1 | 58 | 40 | 49.0 | 490.0 | 336.4 | 153.6  | 7683.1 |
| 5 | 4 | 1  | 1 | 1 | 1 | 1 | 63 | 50 | 56.5 | 565.0 | 396.9 | 168.1  | 168.1  |
| 5 | 4 | 2  | 1 | 0 | 1 | 0 | 58 | 50 | 0.0  | 522.0 | 336.4 | 185.6  | 353.7  |
| 5 | 4 | 3  | 1 | 1 | 1 | 1 | 95 | 50 | 72.5 | 725.0 | 902.5 | -177.5 | 176.2  |
| 5 | 4 | 4  | 1 | 1 | 1 | 1 | 50 | 60 | 55.0 | 550.0 | 250.0 | 300.0  | 476.2  |
| 5 | 4 | 5  | 1 | 1 | 1 | 1 | 50 | 50 | 50.0 | 500.0 | 250.0 | 250.0  | 726.2  |
| 5 | 4 | 6  | 1 | 0 | 1 | 0 | 57 | 50 | 0.0  | 513.0 | 324.9 | 188.1  | 914.3  |
| 5 | 4 | 7  | 1 | 1 | 1 | 1 | 50 | 50 | 50.0 | 500.0 | 250.0 | 250.0  | 1164.3 |
| 5 | 4 | 8  | 1 | 1 | 1 | 1 | 60 | 60 | 60.0 | 600.0 | 360.0 | 240.0  | 1404.3 |
| 5 | 4 | 9  | 1 | 1 | 1 | 1 | 55 | 55 | 55.0 | 550.0 | 302.5 | 247.5  | 1651.8 |
| 5 | 4 | 10 | 1 | 1 | 1 | 1 | 56 | 52 | 54.0 | 540.0 | 313.6 | 226.4  | 1878.2 |
| 5 | 4 | 11 | 1 | 1 | 1 | 1 | 55 | 52 | 53.5 | 535.0 | 302.5 | 232.5  | 2110.7 |
| 5 | 4 | 12 | 1 | 1 | 1 | 1 | 55 | 52 | 53.5 | 535.0 | 302.5 | 232.5  | 2343.2 |
| 5 | 4 | 13 | 1 | 1 | 1 | 1 | 55 | 52 | 53.5 | 535.0 | 302.5 | 232.5  | 2575.7 |
| 5 | 4 | 14 | 1 | 1 | 1 | 1 | 57 | 51 | 54.0 | 540.0 | 324.9 | 215.1  | 2790.8 |

|   |   |    |   |   |   |   |    |    |      |       |       |       |        |
|---|---|----|---|---|---|---|----|----|------|-------|-------|-------|--------|
| 5 | 4 | 15 | 1 | 1 | 1 | 1 | 55 | 51 | 53.0 | 530.0 | 302.5 | 227.5 | 3018.3 |
| 5 | 4 | 16 | 1 | 1 | 1 | 1 | 55 | 50 | 52.5 | 525.0 | 302.5 | 222.5 | 3240.8 |
| 5 | 4 | 17 | 1 | 1 | 1 | 1 | 55 | 51 | 53.0 | 530.0 | 302.5 | 227.5 | 3468.3 |
| 5 | 4 | 18 | 1 | 1 | 1 | 1 | 57 | 52 | 54.5 | 545.0 | 324.9 | 220.1 | 3688.4 |
| 5 | 4 | 19 | 1 | 1 | 1 | 1 | 58 | 52 | 55.0 | 550.0 | 336.4 | 213.6 | 3902.0 |
| 5 | 4 | 20 | 1 | 1 | 1 | 1 | 54 | 52 | 53.0 | 530.0 | 291.6 | 238.4 | 4140.4 |
| 5 | 4 | 21 | 1 | 1 | 1 | 1 | 56 | 54 | 55.0 | 550.0 | 313.6 | 236.4 | 4376.8 |
| 5 | 4 | 22 | 1 | 1 | 1 | 1 | 56 | 52 | 54.0 | 540.0 | 313.6 | 226.4 | 4603.2 |
| 5 | 4 | 23 | 1 | 1 | 1 | 1 | 58 | 50 | 54.0 | 540.0 | 336.4 | 203.6 | 4806.8 |
| 5 | 4 | 24 | 1 | 1 | 1 | 1 | 53 | 50 | 51.5 | 515.0 | 280.9 | 234.1 | 5040.9 |
| 5 | 4 | 25 | 1 | 1 | 1 | 1 | 52 | 56 | 54.0 | 540.0 | 270.4 | 269.6 | 5310.5 |
| 5 | 4 | 26 | 1 | 1 | 1 | 1 | 52 | 54 | 53.0 | 530.0 | 270.4 | 259.6 | 5570.1 |
| 5 | 4 | 27 | 1 | 1 | 0 | 0 | 52 | 45 | 0.0  | 468.0 | 270.4 | 197.6 | 5767.7 |
| 5 | 4 | 28 | 1 | 1 | 1 | 1 | 49 | 54 | 51.5 | 515.0 | 240.1 | 274.9 | 6042.6 |
| 5 | 4 | 29 | 1 | 1 | 1 | 1 | 50 | 56 | 53.0 | 530.0 | 250.0 | 280.0 | 6322.6 |
| 5 | 4 | 30 | 1 | 1 | 1 | 1 | 40 | 58 | 49.0 | 490.0 | 160.0 | 330.0 | 6652.6 |
| 9 | 5 | 1  | 1 | 1 | 0 | 0 | 1  | 45 | 0.0  | 9.0   | 0.1   | 8.9   | 8.9    |
| 9 | 5 | 2  | 1 | 1 | 1 | 1 | 15 | 45 | 30.0 | 300.0 | 22.5  | 277.5 | 286.4  |
| 9 | 5 | 3  | 1 | 1 | 1 | 1 | 20 | 45 | 32.5 | 325.0 | 40.0  | 285.0 | 571.4  |
| 9 | 5 | 4  | 1 | 0 | 1 | 0 | 25 | 45 | 0.0  | 225.0 | 62.5  | 162.5 | 733.9  |
| 9 | 5 | 5  | 1 | 1 | 0 | 0 | 15 | 45 | 0.0  | 135.0 | 22.5  | 112.5 | 846.4  |
| 9 | 5 | 6  | 1 | 1 | 1 | 1 | 15 | 45 | 30.0 | 300.0 | 22.5  | 277.5 | 1123.9 |
| 9 | 5 | 7  | 1 | 1 | 0 | 0 | 30 | 45 | 0.0  | 270.0 | 90.0  | 180.0 | 1303.9 |
| 9 | 5 | 8  | 1 | 1 | 0 | 0 | 20 | 45 | 0.0  | 180.0 | 40.0  | 140.0 | 1443.9 |
| 9 | 5 | 9  | 1 | 0 | 0 | 0 | 46 | 45 | 0.0  | 414.0 | 211.6 | 202.4 | 1646.3 |
| 9 | 5 | 10 | 1 | 1 | 0 | 0 | 45 | 45 | 0.0  | 405.0 | 202.5 | 202.5 | 1848.8 |
| 9 | 5 | 11 | 1 | 1 | 0 | 0 | 45 | 45 | 0.0  | 405.0 | 202.5 | 202.5 | 2051.3 |
| 9 | 5 | 12 | 1 | 1 | 0 | 0 | 45 | 45 | 0.0  | 405.0 | 202.5 | 202.5 | 2253.8 |
| 9 | 5 | 13 | 1 | 1 | 0 | 0 | 45 | 45 | 0.0  | 405.0 | 202.5 | 202.5 | 2456.3 |
| 9 | 5 | 14 | 1 | 0 | 0 | 0 | 45 | 45 | 0.0  | 405.0 | 202.5 | 202.5 | 2658.8 |
| 9 | 5 | 15 | 1 | 0 | 0 | 0 | 45 | 45 | 0.0  | 405.0 | 202.5 | 202.5 | 2861.3 |
| 9 | 5 | 16 | 1 | 1 | 0 | 0 | 45 | 45 | 0.0  | 405.0 | 202.5 | 202.5 | 3063.8 |
| 9 | 5 | 17 | 1 | 1 | 0 | 0 | 45 | 45 | 0.0  | 405.0 | 202.5 | 202.5 | 3266.3 |
| 9 | 5 | 18 | 1 | 0 | 0 | 0 | 45 | 45 | 0.0  | 405.0 | 202.5 | 202.5 | 3468.8 |
| 9 | 5 | 19 | 1 | 0 | 0 | 0 | 45 | 45 | 0.0  | 405.0 | 202.5 | 202.5 | 3671.3 |
| 9 | 5 | 20 | 1 | 0 | 0 | 0 | 45 | 45 | 0.0  | 405.0 | 202.5 | 202.5 | 3873.8 |
| 9 | 5 | 21 | 1 | 0 | 0 | 0 | 45 | 45 | 0.0  | 405.0 | 202.5 | 202.5 | 4076.3 |
| 9 | 5 | 22 | 1 | 0 | 0 | 0 | 45 | 45 | 0.0  | 405.0 | 202.5 | 202.5 | 4278.8 |

|    |   |    |   |   |   |   |    |    |      |       |       |       |        |
|----|---|----|---|---|---|---|----|----|------|-------|-------|-------|--------|
| 9  | 5 | 23 | 1 | 0 | 0 | 0 | 45 | 45 | 0.0  | 405.0 | 202.5 | 202.5 | 4481.3 |
| 9  | 5 | 24 | 1 | 0 | 0 | 0 | 45 | 45 | 0.0  | 405.0 | 202.5 | 202.5 | 4683.8 |
| 9  | 5 | 25 | 1 | 0 | 0 | 0 | 45 | 45 | 0.0  | 405.0 | 202.5 | 202.5 | 4886.3 |
| 9  | 5 | 26 | 1 | 1 | 0 | 0 | 45 | 45 | 0.0  | 405.0 | 202.5 | 202.5 | 5088.8 |
| 9  | 5 | 27 | 1 | 1 | 0 | 0 | 45 | 45 | 0.0  | 405.0 | 202.5 | 202.5 | 5291.3 |
| 9  | 5 | 28 | 1 | 1 | 0 | 0 | 45 | 45 | 0.0  | 405.0 | 202.5 | 202.5 | 5493.8 |
| 9  | 5 | 29 | 1 | 1 | 0 | 0 | 45 | 45 | 0.0  | 405.0 | 202.5 | 202.5 | 5696.3 |
| 9  | 5 | 30 | 1 | 1 | 0 | 0 | 45 | 45 | 0.0  | 405.0 | 202.5 | 202.5 | 5898.8 |
| 16 | 5 | 1  | 1 | 0 | 1 | 0 | 45 | 1  | 0.0  | 405.0 | 202.5 | 202.5 | 202.5  |
| 16 | 5 | 2  | 1 | 1 | 1 | 1 | 45 | 15 | 30.0 | 300.0 | 202.5 | 97.5  | 300.0  |
| 16 | 5 | 3  | 1 | 1 | 1 | 1 | 45 | 20 | 32.5 | 325.0 | 202.5 | 122.5 | 422.5  |
| 16 | 5 | 4  | 1 | 1 | 0 | 0 | 45 | 25 | 0.0  | 405.0 | 202.5 | 202.5 | 625.0  |
| 16 | 5 | 5  | 1 | 0 | 1 | 0 | 45 | 15 | 0.0  | 405.0 | 202.5 | 202.5 | 827.5  |
| 16 | 5 | 6  | 1 | 1 | 1 | 1 | 45 | 15 | 30.0 | 300.0 | 202.5 | 97.5  | 925.0  |
| 16 | 5 | 7  | 1 | 0 | 1 | 0 | 45 | 30 | 0.0  | 405.0 | 202.5 | 202.5 | 1127.5 |
| 16 | 5 | 8  | 1 | 0 | 1 | 0 | 45 | 20 | 0.0  | 405.0 | 202.5 | 202.5 | 1330.0 |
| 16 | 5 | 9  | 1 | 0 | 0 | 0 | 45 | 46 | 0.0  | 405.0 | 202.5 | 202.5 | 1532.5 |
| 16 | 5 | 10 | 1 | 0 | 1 | 0 | 45 | 45 | 0.0  | 405.0 | 202.5 | 202.5 | 1735.0 |
| 16 | 5 | 11 | 1 | 0 | 1 | 0 | 45 | 45 | 0.0  | 405.0 | 202.5 | 202.5 | 1937.5 |
| 16 | 5 | 12 | 1 | 0 | 1 | 0 | 45 | 45 | 0.0  | 405.0 | 202.5 | 202.5 | 2140.0 |
| 16 | 5 | 13 | 1 | 0 | 1 | 0 | 45 | 45 | 0.0  | 405.0 | 202.5 | 202.5 | 2342.5 |
| 16 | 5 | 14 | 1 | 0 | 0 | 0 | 45 | 45 | 0.0  | 405.0 | 202.5 | 202.5 | 2545.0 |
| 16 | 5 | 15 | 1 | 0 | 0 | 0 | 45 | 45 | 0.0  | 405.0 | 202.5 | 202.5 | 2747.5 |
| 16 | 5 | 16 | 1 | 0 | 1 | 0 | 45 | 45 | 0.0  | 405.0 | 202.5 | 202.5 | 2950.0 |
| 16 | 5 | 17 | 1 | 0 | 1 | 0 | 45 | 45 | 0.0  | 405.0 | 202.5 | 202.5 | 3152.5 |
| 16 | 5 | 18 | 1 | 0 | 0 | 0 | 45 | 45 | 0.0  | 405.0 | 202.5 | 202.5 | 3355.0 |
| 16 | 5 | 19 | 1 | 0 | 0 | 0 | 45 | 45 | 0.0  | 405.0 | 202.5 | 202.5 | 3557.5 |
| 16 | 5 | 20 | 1 | 0 | 0 | 0 | 45 | 45 | 0.0  | 405.0 | 202.5 | 202.5 | 3760.0 |
| 16 | 5 | 21 | 1 | 0 | 0 | 0 | 45 | 45 | 0.0  | 405.0 | 202.5 | 202.5 | 3962.5 |
| 16 | 5 | 22 | 1 | 0 | 0 | 0 | 45 | 45 | 0.0  | 405.0 | 202.5 | 202.5 | 4165.0 |
| 16 | 5 | 23 | 1 | 0 | 0 | 0 | 45 | 45 | 0.0  | 405.0 | 202.5 | 202.5 | 4367.5 |
| 16 | 5 | 24 | 1 | 0 | 0 | 0 | 45 | 45 | 0.0  | 405.0 | 202.5 | 202.5 | 4570.0 |
| 16 | 5 | 25 | 1 | 0 | 0 | 0 | 45 | 45 | 0.0  | 405.0 | 202.5 | 202.5 | 4772.5 |
| 16 | 5 | 26 | 1 | 0 | 1 | 0 | 45 | 45 | 0.0  | 405.0 | 202.5 | 202.5 | 4975.0 |
| 16 | 5 | 27 | 1 | 0 | 1 | 0 | 45 | 45 | 0.0  | 405.0 | 202.5 | 202.5 | 5177.5 |
| 16 | 5 | 28 | 1 | 0 | 1 | 0 | 45 | 45 | 0.0  | 405.0 | 202.5 | 202.5 | 5380.0 |
| 16 | 5 | 29 | 1 | 0 | 1 | 0 | 45 | 45 | 0.0  | 405.0 | 202.5 | 202.5 | 5582.5 |
| 16 | 5 | 30 | 1 | 0 | 1 | 0 | 45 | 45 | 0.0  | 405.0 | 202.5 | 202.5 | 5785.0 |

|    |   |    |   |   |   |   |    |    |      |       |       |       |        |
|----|---|----|---|---|---|---|----|----|------|-------|-------|-------|--------|
| 10 | 6 | 1  | 1 | 0 | 0 | 0 | 40 | 45 | 0.0  | 360.0 | 160.0 | 200.0 | 200.0  |
| 10 | 6 | 2  | 1 | 1 | 1 | 1 | 46 | 55 | 50.5 | 505.0 | 211.6 | 293.4 | 493.4  |
| 10 | 6 | 3  | 1 | 1 | 1 | 1 | 47 | 60 | 53.5 | 535.0 | 220.9 | 314.1 | 807.5  |
| 10 | 6 | 4  | 1 | 1 | 1 | 1 | 50 | 59 | 54.5 | 545.0 | 250.0 | 295.0 | 1102.5 |
| 10 | 6 | 5  | 1 | 1 | 1 | 1 | 46 | 50 | 48.0 | 480.0 | 211.6 | 268.4 | 1370.9 |
| 10 | 6 | 6  | 1 | 1 | 1 | 1 | 44 | 57 | 50.5 | 505.0 | 193.6 | 311.4 | 1682.3 |
| 10 | 6 | 7  | 1 | 1 | 1 | 1 | 45 | 56 | 50.5 | 505.0 | 202.5 | 302.5 | 1984.8 |
| 10 | 6 | 8  | 1 | 1 | 1 | 1 | 44 | 58 | 51.0 | 510.0 | 193.6 | 316.4 | 2301.2 |
| 10 | 6 | 9  | 1 | 1 | 1 | 1 | 44 | 50 | 47.0 | 470.0 | 193.6 | 276.4 | 2577.6 |
| 10 | 6 | 10 | 1 | 1 | 1 | 1 | 47 | 45 | 46.0 | 460.0 | 220.9 | 239.1 | 2816.7 |
| 10 | 6 | 11 | 1 | 1 | 1 | 1 | 50 | 44 | 47.0 | 470.0 | 250.0 | 220.0 | 3036.7 |
| 10 | 6 | 12 | 1 | 1 | 1 | 1 | 51 | 44 | 47.5 | 475.0 | 260.1 | 214.9 | 3251.6 |
| 10 | 6 | 13 | 1 | 1 | 1 | 1 | 48 | 25 | 36.5 | 365.0 | 230.4 | 134.6 | 3386.2 |
| 10 | 6 | 14 | 1 | 1 | 1 | 1 | 50 | 32 | 41.0 | 410.0 | 250.0 | 160.0 | 3546.2 |
| 10 | 6 | 15 | 1 | 1 | 1 | 1 | 55 | 20 | 37.5 | 375.0 | 302.5 | 72.5  | 3618.7 |
| 10 | 6 | 16 | 1 | 0 | 1 | 0 | 44 | 30 | 0.0  | 396.0 | 193.6 | 202.4 | 3821.1 |
| 10 | 6 | 17 | 1 | 1 | 0 | 0 | 45 | 50 | 0.0  | 405.0 | 202.5 | 202.5 | 4023.6 |
| 10 | 6 | 18 | 1 | 1 | 1 | 1 | 44 | 35 | 39.5 | 395.0 | 193.6 | 201.4 | 4225.0 |
| 10 | 6 | 19 | 1 | 1 | 1 | 1 | 46 | 20 | 33.0 | 330.0 | 211.6 | 118.4 | 4343.4 |
| 10 | 6 | 20 | 1 | 1 | 1 | 1 | 44 | 25 | 34.5 | 345.0 | 193.6 | 151.4 | 4494.8 |
| 10 | 6 | 21 | 1 | 1 | 1 | 1 | 50 | 32 | 41.0 | 410.0 | 250.0 | 160.0 | 4654.8 |
| 10 | 6 | 22 | 1 | 0 | 1 | 0 | 45 | 50 | 0.0  | 405.0 | 202.5 | 202.5 | 4857.3 |
| 10 | 6 | 23 | 1 | 0 | 1 | 0 | 44 | 50 | 0.0  | 396.0 | 193.6 | 202.4 | 5059.7 |
| 10 | 6 | 24 | 1 | 1 | 1 | 1 | 47 | 32 | 39.5 | 395.0 | 220.9 | 174.1 | 5233.8 |
| 10 | 6 | 25 | 1 | 1 | 1 | 1 | 56 | 20 | 38.0 | 380.0 | 313.6 | 66.4  | 5300.2 |
| 10 | 6 | 26 | 1 | 0 | 1 | 0 | 45 | 15 | 0.0  | 405.0 | 202.5 | 202.5 | 5502.7 |
| 10 | 6 | 27 | 1 | 0 | 1 | 0 | 45 | 50 | 0.0  | 405.0 | 202.5 | 202.5 | 5705.2 |
| 10 | 6 | 28 | 1 | 0 | 1 | 0 | 45 | 50 | 0.0  | 405.0 | 202.5 | 202.5 | 5907.7 |
| 10 | 6 | 29 | 1 | 0 | 1 | 0 | 45 | 50 | 0.0  | 405.0 | 202.5 | 202.5 | 6110.2 |
| 10 | 6 | 30 | 1 | 0 | 1 | 0 | 45 | 50 | 0.0  | 405.0 | 202.5 | 202.5 | 6312.7 |
| 15 | 6 | 1  | 1 | 0 | 0 | 0 | 45 | 40 | 0.0  | 405.0 | 202.5 | 202.5 | 202.5  |
| 15 | 6 | 2  | 1 | 1 | 1 | 1 | 55 | 46 | 50.5 | 505.0 | 302.5 | 202.5 | 405.0  |
| 15 | 6 | 3  | 1 | 1 | 1 | 1 | 60 | 47 | 53.5 | 535.0 | 360.0 | 175.0 | 580.0  |
| 15 | 6 | 4  | 1 | 1 | 1 | 1 | 59 | 50 | 54.5 | 545.0 | 348.1 | 196.9 | 776.9  |
| 15 | 6 | 5  | 1 | 1 | 1 | 1 | 50 | 46 | 48.0 | 480.0 | 250.0 | 230.0 | 1006.9 |
| 15 | 6 | 6  | 1 | 1 | 1 | 1 | 57 | 44 | 50.5 | 505.0 | 324.9 | 180.1 | 1187.0 |
| 15 | 6 | 7  | 1 | 1 | 1 | 1 | 56 | 45 | 50.5 | 505.0 | 313.6 | 191.4 | 1378.4 |
| 15 | 6 | 8  | 1 | 1 | 1 | 1 | 58 | 44 | 51.0 | 510.0 | 336.4 | 173.6 | 1552.0 |

|    |   |    |   |   |   |   |    |    |      |       |       |       |        |
|----|---|----|---|---|---|---|----|----|------|-------|-------|-------|--------|
| 15 | 6 | 9  | 1 | 1 | 1 | 1 | 50 | 44 | 47.0 | 470.0 | 250.0 | 220.0 | 1772.0 |
| 15 | 6 | 10 | 1 | 1 | 1 | 1 | 45 | 47 | 46.0 | 460.0 | 202.5 | 257.5 | 2029.5 |
| 15 | 6 | 11 | 1 | 1 | 1 | 1 | 44 | 50 | 47.0 | 470.0 | 193.6 | 276.4 | 2305.9 |
| 15 | 6 | 12 | 1 | 1 | 1 | 1 | 44 | 51 | 47.5 | 475.0 | 193.6 | 281.4 | 2587.3 |
| 15 | 6 | 13 | 1 | 1 | 1 | 1 | 25 | 48 | 36.5 | 365.0 | 62.5  | 302.5 | 2889.8 |
| 15 | 6 | 14 | 1 | 1 | 1 | 1 | 32 | 50 | 41.0 | 410.0 | 102.4 | 307.6 | 3197.4 |
| 15 | 6 | 15 | 1 | 1 | 1 | 1 | 20 | 55 | 37.5 | 375.0 | 40.0  | 335.0 | 3532.4 |
| 15 | 6 | 16 | 1 | 1 | 0 | 0 | 30 | 44 | 0.0  | 270.0 | 90.0  | 180.0 | 3712.4 |
| 15 | 6 | 17 | 1 | 0 | 1 | 0 | 50 | 45 | 0.0  | 450.0 | 250.0 | 200.0 | 3912.4 |
| 15 | 6 | 18 | 1 | 1 | 1 | 1 | 35 | 44 | 39.5 | 395.0 | 122.5 | 272.5 | 4184.9 |
| 15 | 6 | 19 | 1 | 1 | 1 | 1 | 20 | 46 | 33.0 | 330.0 | 40.0  | 290.0 | 4474.9 |
| 15 | 6 | 20 | 1 | 1 | 1 | 1 | 25 | 44 | 34.5 | 345.0 | 62.5  | 282.5 | 4757.4 |
| 15 | 6 | 21 | 1 | 1 | 1 | 1 | 32 | 50 | 41.0 | 410.0 | 102.4 | 307.6 | 5065.0 |
| 15 | 6 | 22 | 1 | 1 | 0 | 0 | 50 | 45 | 0.0  | 450.0 | 250.0 | 200.0 | 5265.0 |
| 15 | 6 | 23 | 1 | 1 | 0 | 0 | 50 | 44 | 0.0  | 450.0 | 250.0 | 200.0 | 5465.0 |
| 15 | 6 | 24 | 1 | 1 | 1 | 1 | 32 | 47 | 39.5 | 395.0 | 102.4 | 292.6 | 5757.6 |
| 15 | 6 | 25 | 1 | 1 | 1 | 1 | 20 | 56 | 38.0 | 380.0 | 40.0  | 340.0 | 6097.6 |
| 15 | 6 | 26 | 1 | 1 | 0 | 0 | 15 | 45 | 0.0  | 135.0 | 22.5  | 112.5 | 6210.1 |
| 15 | 6 | 27 | 1 | 1 | 0 | 0 | 50 | 45 | 0.0  | 450.0 | 250.0 | 200.0 | 6410.1 |
| 15 | 6 | 28 | 1 | 1 | 0 | 0 | 50 | 45 | 0.0  | 450.0 | 250.0 | 200.0 | 6610.1 |
| 15 | 6 | 29 | 1 | 1 | 0 | 0 | 50 | 45 | 0.0  | 450.0 | 250.0 | 200.0 | 6810.1 |
| 15 | 6 | 30 | 1 | 1 | 0 | 0 | 50 | 45 | 0.0  | 450.0 | 250.0 | 200.0 | 7010.1 |
| 11 | 7 | 1  | 1 | 1 | 0 | 0 | 55 | 45 | 0.0  | 495.0 | 302.5 | 192.5 | 192.5  |
| 11 | 7 | 2  | 1 | 1 | 1 | 1 | 60 | 5  | 32.5 | 325.0 | 360.0 | -35.0 | 157.5  |
| 11 | 7 | 3  | 1 | 1 | 1 | 1 | 60 | 5  | 32.5 | 325.0 | 360.0 | -35.0 | 122.5  |
| 11 | 7 | 4  | 1 | 0 | 1 | 0 | 65 | 45 | 0.0  | 585.0 | 422.5 | 162.5 | 285.0  |
| 11 | 7 | 5  | 1 | 0 | 1 | 0 | 65 | 45 | 0.0  | 585.0 | 422.5 | 162.5 | 447.5  |
| 11 | 7 | 6  | 1 | 0 | 1 | 0 | 70 | 45 | 0.0  | 630.0 | 490.0 | 140.0 | 587.5  |
| 11 | 7 | 7  | 1 | 0 | 1 | 0 | 50 | 45 | 0.0  | 450.0 | 250.0 | 200.0 | 787.5  |
| 11 | 7 | 8  | 1 | 1 | 1 | 1 | 45 | 5  | 25.0 | 250.0 | 202.5 | 47.5  | 835.0  |
| 11 | 7 | 9  | 1 | 0 | 1 | 0 | 45 | 45 | 0.0  | 405.0 | 202.5 | 202.5 | 1037.5 |
| 11 | 7 | 10 | 1 | 0 | 1 | 0 | 45 | 45 | 0.0  | 405.0 | 202.5 | 202.5 | 1240.0 |
| 11 | 7 | 11 | 1 | 0 | 1 | 0 | 45 | 45 | 0.0  | 405.0 | 202.5 | 202.5 | 1442.5 |
| 11 | 7 | 12 | 1 | 0 | 1 | 0 | 23 | 45 | 0.0  | 207.0 | 52.9  | 154.1 | 1596.6 |
| 11 | 7 | 13 | 1 | 0 | 1 | 0 | 23 | 45 | 0.0  | 207.0 | 52.9  | 154.1 | 1750.7 |
| 11 | 7 | 14 | 1 | 0 | 1 | 0 | 23 | 45 | 0.0  | 207.0 | 52.9  | 154.1 | 1904.8 |
| 11 | 7 | 15 | 1 | 0 | 1 | 0 | 23 | 45 | 0.0  | 207.0 | 52.9  | 154.1 | 2058.9 |
| 11 | 7 | 16 | 1 | 0 | 0 | 0 | 23 | 45 | 0.0  | 207.0 | 52.9  | 154.1 | 2213.0 |

|    |   |    |   |   |   |   |    |    |      |       |       |       |        |
|----|---|----|---|---|---|---|----|----|------|-------|-------|-------|--------|
| 11 | 7 | 17 | 1 | 0 | 0 | 0 | 23 | 45 | 0.0  | 207.0 | 52.9  | 154.1 | 2367.1 |
| 11 | 7 | 18 | 1 | 0 | 0 | 0 | 23 | 45 | 0.0  | 207.0 | 52.9  | 154.1 | 2521.2 |
| 11 | 7 | 19 | 1 | 0 | 0 | 0 | 23 | 45 | 0.0  | 207.0 | 52.9  | 154.1 | 2675.3 |
| 11 | 7 | 20 | 1 | 0 | 0 | 0 | 23 | 45 | 0.0  | 207.0 | 52.9  | 154.1 | 2829.4 |
| 11 | 7 | 21 | 1 | 0 | 0 | 0 | 23 | 45 | 0.0  | 207.0 | 52.9  | 154.1 | 2983.5 |
| 11 | 7 | 22 | 1 | 0 | 1 | 0 | 23 | 45 | 0.0  | 207.0 | 52.9  | 154.1 | 3137.6 |
| 11 | 7 | 23 | 1 | 0 | 1 | 0 | 23 | 45 | 0.0  | 207.0 | 52.9  | 154.1 | 3291.7 |
| 11 | 7 | 24 | 1 | 1 | 1 | 1 | 23 | 5  | 14.0 | 140.0 | 52.9  | 87.1  | 3378.8 |
| 11 | 7 | 25 | 1 | 1 | 0 | 0 | 11 | 45 | 0.0  | 99.0  | 12.1  | 86.9  | 3465.7 |
| 11 | 7 | 26 | 1 | 1 | 0 | 0 | 23 | 45 | 0.0  | 207.0 | 52.9  | 154.1 | 3619.8 |
| 11 | 7 | 27 | 1 | 0 | 0 | 0 | 23 | 45 | 0.0  | 207.0 | 52.9  | 154.1 | 3773.9 |
| 11 | 7 | 28 | 1 | 0 | 0 | 0 | 23 | 45 | 0.0  | 207.0 | 52.9  | 154.1 | 3928.0 |
| 11 | 7 | 29 | 1 | 0 | 0 | 0 | 23 | 45 | 0.0  | 207.0 | 52.9  | 154.1 | 4082.1 |
| 11 | 7 | 30 | 1 | 0 | 0 | 0 | 23 | 45 | 0.0  | 207.0 | 52.9  | 154.1 | 4236.2 |
| 14 | 7 | 1  | 1 | 0 | 1 | 0 | 45 | 55 | 0.0  | 405.0 | 202.5 | 202.5 | 202.5  |
| 14 | 7 | 2  | 1 | 1 | 1 | 1 | 5  | 60 | 32.5 | 325.0 | 2.5   | 322.5 | 525.0  |
| 14 | 7 | 3  | 1 | 1 | 1 | 1 | 5  | 60 | 32.5 | 325.0 | 2.5   | 322.5 | 847.5  |
| 14 | 7 | 4  | 1 | 1 | 0 | 0 | 45 | 65 | 0.0  | 405.0 | 202.5 | 202.5 | 1050.0 |
| 14 | 7 | 5  | 1 | 1 | 0 | 0 | 45 | 65 | 0.0  | 405.0 | 202.5 | 202.5 | 1252.5 |
| 14 | 7 | 6  | 1 | 1 | 0 | 0 | 45 | 70 | 0.0  | 405.0 | 202.5 | 202.5 | 1455.0 |
| 14 | 7 | 7  | 1 | 1 | 0 | 0 | 45 | 50 | 0.0  | 405.0 | 202.5 | 202.5 | 1657.5 |
| 14 | 7 | 8  | 1 | 1 | 1 | 1 | 5  | 45 | 25.0 | 250.0 | 2.5   | 247.5 | 1905.0 |
| 14 | 7 | 9  | 1 | 1 | 0 | 0 | 45 | 45 | 0.0  | 405.0 | 202.5 | 202.5 | 2107.5 |
| 14 | 7 | 10 | 1 | 1 | 0 | 0 | 45 | 45 | 0.0  | 405.0 | 202.5 | 202.5 | 2310.0 |
| 14 | 7 | 11 | 1 | 1 | 0 | 0 | 45 | 45 | 0.0  | 405.0 | 202.5 | 202.5 | 2512.5 |
| 14 | 7 | 12 | 1 | 1 | 0 | 0 | 45 | 23 | 0.0  | 405.0 | 202.5 | 202.5 | 2715.0 |
| 14 | 7 | 13 | 1 | 1 | 0 | 0 | 45 | 23 | 0.0  | 405.0 | 202.5 | 202.5 | 2917.5 |
| 14 | 7 | 14 | 1 | 1 | 0 | 0 | 45 | 23 | 0.0  | 405.0 | 202.5 | 202.5 | 3120.0 |
| 14 | 7 | 15 | 1 | 1 | 0 | 0 | 45 | 23 | 0.0  | 405.0 | 202.5 | 202.5 | 3322.5 |
| 14 | 7 | 16 | 1 | 0 | 0 | 0 | 45 | 23 | 0.0  | 405.0 | 202.5 | 202.5 | 3525.0 |
| 14 | 7 | 17 | 1 | 0 | 0 | 0 | 45 | 23 | 0.0  | 405.0 | 202.5 | 202.5 | 3727.5 |
| 14 | 7 | 18 | 1 | 0 | 0 | 0 | 45 | 23 | 0.0  | 405.0 | 202.5 | 202.5 | 3930.0 |
| 14 | 7 | 19 | 1 | 0 | 0 | 0 | 45 | 23 | 0.0  | 405.0 | 202.5 | 202.5 | 4132.5 |
| 14 | 7 | 20 | 1 | 0 | 0 | 0 | 45 | 23 | 0.0  | 405.0 | 202.5 | 202.5 | 4335.0 |
| 14 | 7 | 21 | 1 | 0 | 0 | 0 | 45 | 23 | 0.0  | 405.0 | 202.5 | 202.5 | 4537.5 |
| 14 | 7 | 22 | 1 | 1 | 0 | 0 | 45 | 23 | 0.0  | 405.0 | 202.5 | 202.5 | 4740.0 |
| 14 | 7 | 23 | 1 | 1 | 0 | 0 | 45 | 23 | 0.0  | 405.0 | 202.5 | 202.5 | 4942.5 |
| 14 | 7 | 24 | 1 | 1 | 1 | 1 | 5  | 23 | 14.0 | 140.0 | 2.5   | 137.5 | 5080.0 |

|    |   |    |   |   |   |   |    |    |      |       |       |       |        |
|----|---|----|---|---|---|---|----|----|------|-------|-------|-------|--------|
| 14 | 7 | 25 | 1 | 0 | 1 | 0 | 45 | 11 | 0.0  | 405.0 | 202.5 | 202.5 | 5282.5 |
| 14 | 7 | 26 | 1 | 0 | 1 | 0 | 45 | 23 | 0.0  | 405.0 | 202.5 | 202.5 | 5485.0 |
| 14 | 7 | 27 | 1 | 0 | 0 | 0 | 45 | 23 | 0.0  | 405.0 | 202.5 | 202.5 | 5687.5 |
| 14 | 7 | 28 | 1 | 0 | 0 | 0 | 45 | 23 | 0.0  | 405.0 | 202.5 | 202.5 | 5890.0 |
| 14 | 7 | 29 | 1 | 0 | 0 | 0 | 45 | 23 | 0.0  | 405.0 | 202.5 | 202.5 | 6092.5 |
| 14 | 7 | 30 | 1 | 0 | 0 | 0 | 45 | 23 | 0.0  | 405.0 | 202.5 | 202.5 | 6295.0 |
| 12 | 8 | 1  | 1 | 0 | 1 | 0 | 24 | 48 | 0.0  | 216.0 | 57.6  | 158.4 | 158.4  |
| 12 | 8 | 2  | 1 | 1 | 1 | 1 | 30 | 52 | 41.0 | 410.0 | 90.0  | 320.0 | 478.4  |
| 12 | 8 | 3  | 1 | 1 | 1 | 1 | 40 | 50 | 45.0 | 450.0 | 160.0 | 290.0 | 768.4  |
| 12 | 8 | 4  | 1 | 1 | 1 | 1 | 50 | 49 | 49.5 | 495.0 | 250.0 | 245.0 | 1013.4 |
| 12 | 8 | 5  | 1 | 1 | 1 | 1 | 50 | 50 | 50.0 | 500.0 | 250.0 | 250.0 | 1263.4 |
| 12 | 8 | 6  | 1 | 1 | 1 | 1 | 51 | 51 | 51.0 | 510.0 | 260.1 | 249.9 | 1513.3 |
| 12 | 8 | 7  | 1 | 1 | 1 | 1 | 51 | 48 | 49.5 | 495.0 | 260.1 | 234.9 | 1748.2 |
| 12 | 8 | 8  | 1 | 1 | 1 | 1 | 45 | 45 | 45.0 | 450.0 | 202.5 | 247.5 | 1995.7 |
| 12 | 8 | 9  | 1 | 1 | 1 | 1 | 47 | 55 | 51.0 | 510.0 | 220.9 | 289.1 | 2284.8 |
| 12 | 8 | 10 | 1 | 1 | 1 | 1 | 50 | 48 | 49.0 | 490.0 | 250.0 | 240.0 | 2524.8 |
| 12 | 8 | 11 | 1 | 1 | 1 | 1 | 49 | 49 | 49.0 | 490.0 | 240.1 | 249.9 | 2774.7 |
| 12 | 8 | 12 | 1 | 1 | 1 | 1 | 50 | 47 | 48.5 | 485.0 | 250.0 | 235.0 | 3009.7 |
| 12 | 8 | 13 | 1 | 1 | 1 | 1 | 49 | 48 | 48.5 | 485.0 | 240.1 | 244.9 | 3254.6 |
| 12 | 8 | 14 | 1 | 1 | 1 | 1 | 49 | 47 | 48.0 | 480.0 | 240.1 | 239.9 | 3494.5 |
| 12 | 8 | 15 | 1 | 1 | 1 | 1 | 45 | 46 | 45.5 | 455.0 | 202.5 | 252.5 | 3747.0 |
| 12 | 8 | 16 | 1 | 1 | 1 | 1 | 45 | 48 | 46.5 | 465.0 | 202.5 | 262.5 | 4009.5 |
| 12 | 8 | 17 | 1 | 1 | 1 | 1 | 47 | 50 | 48.5 | 485.0 | 220.9 | 264.1 | 4273.6 |
| 12 | 8 | 18 | 1 | 1 | 1 | 1 | 49 | 52 | 50.5 | 505.0 | 240.1 | 264.9 | 4538.5 |
| 12 | 8 | 19 | 1 | 1 | 1 | 1 | 50 | 51 | 50.5 | 505.0 | 250.0 | 255.0 | 4793.5 |
| 12 | 8 | 20 | 1 | 1 | 1 | 1 | 49 | 54 | 51.5 | 515.0 | 240.1 | 274.9 | 5068.4 |
| 12 | 8 | 21 | 1 | 1 | 1 | 1 | 50 | 51 | 50.5 | 505.0 | 250.0 | 255.0 | 5323.4 |
| 12 | 8 | 22 | 1 | 1 | 1 | 1 | 51 | 47 | 49.0 | 490.0 | 260.1 | 229.9 | 5553.3 |
| 12 | 8 | 23 | 1 | 1 | 1 | 1 | 51 | 49 | 50.0 | 500.0 | 260.1 | 239.9 | 5793.2 |
| 12 | 8 | 24 | 1 | 1 | 1 | 1 | 49 | 47 | 48.0 | 480.0 | 240.1 | 239.9 | 6033.1 |
| 12 | 8 | 25 | 1 | 1 | 1 | 1 | 48 | 50 | 49.0 | 490.0 | 230.4 | 259.6 | 6292.7 |
| 12 | 8 | 26 | 1 | 1 | 1 | 1 | 49 | 47 | 48.0 | 480.0 | 240.1 | 239.9 | 6532.6 |
| 12 | 8 | 27 | 1 | 1 | 1 | 1 | 48 | 47 | 47.5 | 475.0 | 230.4 | 244.6 | 6777.2 |
| 12 | 8 | 28 | 1 | 1 | 1 | 1 | 47 | 49 | 48.0 | 480.0 | 220.9 | 259.1 | 7036.3 |
| 12 | 8 | 29 | 1 | 1 | 1 | 1 | 49 | 47 | 48.0 | 480.0 | 240.1 | 239.9 | 7276.2 |
| 12 | 8 | 30 | 1 | 1 | 1 | 1 | 48 | 47 | 47.5 | 475.0 | 230.4 | 244.6 | 7520.8 |
| 13 | 8 | 1  | 1 | 1 | 0 | 0 | 48 | 24 | 0.0  | 432.0 | 230.4 | 201.6 | 201.6  |
| 13 | 8 | 2  | 1 | 1 | 1 | 1 | 52 | 30 | 41.0 | 410.0 | 270.4 | 139.6 | 341.2  |



|    |   |    |   |   |   |   |     |    |      |       |        |        |        |
|----|---|----|---|---|---|---|-----|----|------|-------|--------|--------|--------|
| 13 | 8 | 3  | 1 | 1 | 1 | 1 | 50  | 40 | 45.0 | 450.0 | 250.0  | 200.0  | 541.2  |
| 13 | 8 | 4  | 1 | 1 | 1 | 1 | 49  | 50 | 49.5 | 495.0 | 240.1  | 254.9  | 796.1  |
| 13 | 8 | 5  | 1 | 1 | 1 | 1 | 50  | 50 | 50.0 | 500.0 | 250.0  | 250.0  | 1046.1 |
| 13 | 8 | 6  | 1 | 1 | 1 | 1 | 51  | 51 | 51.0 | 510.0 | 260.1  | 249.9  | 1296.0 |
| 13 | 8 | 7  | 1 | 1 | 1 | 1 | 48  | 51 | 49.5 | 495.0 | 230.4  | 264.6  | 1560.6 |
| 13 | 8 | 8  | 1 | 1 | 1 | 1 | 45  | 45 | 45.0 | 450.0 | 202.5  | 247.5  | 1808.1 |
| 13 | 8 | 9  | 1 | 1 | 1 | 1 | 55  | 47 | 51.0 | 510.0 | 302.5  | 207.5  | 2015.6 |
| 13 | 8 | 10 | 1 | 1 | 1 | 1 | 48  | 50 | 49.0 | 490.0 | 230.4  | 259.6  | 2275.2 |
| 13 | 8 | 11 | 1 | 1 | 1 | 1 | 49  | 49 | 49.0 | 490.0 | 240.1  | 249.9  | 2525.1 |
| 13 | 8 | 12 | 1 | 1 | 1 | 1 | 47  | 50 | 48.5 | 485.0 | 220.9  | 264.1  | 2789.2 |
| 13 | 8 | 13 | 1 | 1 | 1 | 1 | 48  | 49 | 48.5 | 485.0 | 230.4  | 254.6  | 3043.8 |
| 13 | 8 | 14 | 1 | 1 | 1 | 1 | 47  | 49 | 48.0 | 480.0 | 220.9  | 259.1  | 3302.9 |
| 13 | 8 | 15 | 1 | 1 | 1 | 1 | 46  | 45 | 45.5 | 455.0 | 211.6  | 243.4  | 3546.3 |
| 13 | 8 | 16 | 1 | 1 | 1 | 1 | 48  | 45 | 46.5 | 465.0 | 230.4  | 234.6  | 3780.9 |
| 13 | 8 | 17 | 1 | 1 | 1 | 1 | 50  | 47 | 48.5 | 485.0 | 250.0  | 235.0  | 4015.9 |
| 13 | 8 | 18 | 1 | 1 | 1 | 1 | 52  | 49 | 50.5 | 505.0 | 270.4  | 234.6  | 4250.5 |
| 13 | 8 | 19 | 1 | 1 | 1 | 1 | 51  | 50 | 50.5 | 505.0 | 260.1  | 244.9  | 4495.4 |
| 13 | 8 | 20 | 1 | 1 | 1 | 1 | 54  | 49 | 51.5 | 515.0 | 291.6  | 223.4  | 4718.8 |
| 13 | 8 | 21 | 1 | 1 | 1 | 1 | 51  | 50 | 50.5 | 505.0 | 260.1  | 244.9  | 4963.7 |
| 13 | 8 | 22 | 1 | 1 | 1 | 1 | 47  | 51 | 49.0 | 490.0 | 220.9  | 269.1  | 5232.8 |
| 13 | 8 | 23 | 1 | 1 | 1 | 1 | 49  | 51 | 50.0 | 500.0 | 240.1  | 259.9  | 5492.7 |
| 13 | 8 | 24 | 1 | 1 | 1 | 1 | 47  | 49 | 48.0 | 480.0 | 220.9  | 259.1  | 5751.8 |
| 13 | 8 | 25 | 1 | 1 | 1 | 1 | 50  | 48 | 49.0 | 490.0 | 250.0  | 240.0  | 5991.8 |
| 13 | 8 | 26 | 1 | 1 | 1 | 1 | 47  | 49 | 48.0 | 480.0 | 220.9  | 259.1  | 6250.9 |
| 13 | 8 | 27 | 1 | 1 | 1 | 1 | 47  | 48 | 47.5 | 475.0 | 220.9  | 254.1  | 6505.0 |
| 13 | 8 | 28 | 1 | 1 | 1 | 1 | 49  | 47 | 48.0 | 480.0 | 240.1  | 239.9  | 6744.9 |
| 13 | 8 | 29 | 1 | 1 | 1 | 1 | 47  | 49 | 48.0 | 480.0 | 220.9  | 259.1  | 7004.0 |
| 13 | 8 | 30 | 1 | 1 | 1 | 1 | 47  | 48 | 47.5 | 475.0 | 220.9  | 254.1  | 7258.1 |
| 17 | 9 | 1  | 2 | 1 | 1 | 1 | 50  | 23 | 36.5 | 365.0 | 250.0  | 115.0  | 115.0  |
| 17 | 9 | 2  | 2 | 1 | 1 | 1 | 50  | 10 | 30.0 | 300.0 | 250.0  | 50.0   | 165.0  |
| 17 | 9 | 3  | 2 | 1 | 0 | 0 | 100 | 23 | 0.0  | 900.0 | 1000.0 | -100.0 | 65.0   |
| 17 | 9 | 4  | 2 | 1 | 1 | 1 | 50  | 5  | 27.5 | 275.0 | 250.0  | 25.0   | 90.0   |
| 17 | 9 | 5  | 2 | 1 | 1 | 1 | 50  | 45 | 47.5 | 475.0 | 250.0  | 225.0  | 315.0  |
| 17 | 9 | 6  | 2 | 1 | 1 | 1 | 50  | 43 | 46.5 | 465.0 | 250.0  | 215.0  | 530.0  |
| 17 | 9 | 7  | 2 | 1 | 1 | 1 | 50  | 40 | 45.0 | 450.0 | 250.0  | 200.0  | 730.0  |
| 17 | 9 | 8  | 2 | 1 | 1 | 1 | 55  | 40 | 47.5 | 475.0 | 302.5  | 172.5  | 902.5  |
| 17 | 9 | 9  | 2 | 1 | 1 | 1 | 50  | 45 | 47.5 | 475.0 | 250.0  | 225.0  | 1127.5 |
| 17 | 9 | 10 | 2 | 1 | 1 | 1 | 45  | 40 | 42.5 | 425.0 | 202.5  | 222.5  | 1350.0 |

|    |   |    |   |   |   |   |    |     |      |       |       |       |        |
|----|---|----|---|---|---|---|----|-----|------|-------|-------|-------|--------|
| 17 | 9 | 11 | 2 | 1 | 0 | 0 | 50 | 45  | 0.0  | 450.0 | 250.0 | 200.0 | 1550.0 |
| 17 | 9 | 12 | 2 | 1 | 1 | 1 | 45 | 50  | 47.5 | 475.0 | 202.5 | 272.5 | 1822.5 |
| 17 | 9 | 13 | 2 | 1 | 1 | 1 | 45 | 23  | 34.0 | 340.0 | 202.5 | 137.5 | 1960.0 |
| 17 | 9 | 14 | 2 | 1 | 1 | 1 | 50 | 30  | 40.0 | 400.0 | 250.0 | 150.0 | 2110.0 |
| 17 | 9 | 15 | 2 | 1 | 1 | 1 | 50 | 27  | 38.5 | 385.0 | 250.0 | 135.0 | 2245.0 |
| 17 | 9 | 16 | 2 | 1 | 1 | 1 | 50 | 5   | 27.5 | 275.0 | 250.0 | 25.0  | 2270.0 |
| 17 | 9 | 17 | 2 | 1 | 1 | 1 | 50 | 20  | 35.0 | 350.0 | 250.0 | 100.0 | 2370.0 |
| 17 | 9 | 18 | 2 | 0 | 1 | 0 | 45 | 25  | 0.0  | 405.0 | 202.5 | 202.5 | 2572.5 |
| 17 | 9 | 19 | 2 | 1 | 1 | 1 | 50 | 25  | 37.5 | 375.0 | 250.0 | 125.0 | 2697.5 |
| 17 | 9 | 20 | 2 | 0 | 1 | 0 | 45 | 30  | 0.0  | 405.0 | 202.5 | 202.5 | 2900.0 |
| 17 | 9 | 21 | 2 | 0 | 1 | 0 | 45 | 45  | 0.0  | 405.0 | 202.5 | 202.5 | 3102.5 |
| 17 | 9 | 22 | 2 | 1 | 1 | 1 | 45 | 25  | 35.0 | 350.0 | 202.5 | 147.5 | 3250.0 |
| 17 | 9 | 23 | 2 | 0 | 1 | 0 | 45 | 50  | 0.0  | 405.0 | 202.5 | 202.5 | 3452.5 |
| 17 | 9 | 24 | 2 | 0 | 1 | 0 | 45 | 45  | 0.0  | 405.0 | 202.5 | 202.5 | 3655.0 |
| 17 | 9 | 25 | 2 | 0 | 1 | 0 | 45 | 45  | 0.0  | 405.0 | 202.5 | 202.5 | 3857.5 |
| 17 | 9 | 26 | 2 | 0 | 0 | 0 | 45 | 45  | 0.0  | 405.0 | 202.5 | 202.5 | 4060.0 |
| 17 | 9 | 27 | 2 | 0 | 1 | 0 | 45 | 45  | 0.0  | 405.0 | 202.5 | 202.5 | 4262.5 |
| 17 | 9 | 28 | 2 | 0 | 1 | 0 | 45 | 45  | 0.0  | 405.0 | 202.5 | 202.5 | 4465.0 |
| 17 | 9 | 29 | 2 | 0 | 1 | 0 | 45 | 45  | 0.0  | 405.0 | 202.5 | 202.5 | 4667.5 |
| 17 | 9 | 30 | 2 | 0 | 1 | 0 | 45 | 45  | 0.0  | 405.0 | 202.5 | 202.5 | 4870.0 |
| 24 | 9 | 1  | 2 | 1 | 1 | 1 | 23 | 50  | 36.5 | 365.0 | 52.9  | 312.1 | 312.1  |
| 24 | 9 | 2  | 2 | 1 | 1 | 1 | 10 | 50  | 30.0 | 300.0 | 10.0  | 290.0 | 602.1  |
| 24 | 9 | 3  | 2 | 0 | 1 | 0 | 23 | 100 | 0.0  | 207.0 | 52.9  | 154.1 | 756.2  |
| 24 | 9 | 4  | 2 | 1 | 1 | 1 | 5  | 50  | 27.5 | 275.0 | 2.5   | 272.5 | 1028.7 |
| 24 | 9 | 5  | 2 | 1 | 1 | 1 | 45 | 50  | 47.5 | 475.0 | 202.5 | 272.5 | 1301.2 |
| 24 | 9 | 6  | 2 | 1 | 1 | 1 | 43 | 50  | 46.5 | 465.0 | 184.9 | 280.1 | 1581.3 |
| 24 | 9 | 7  | 2 | 1 | 1 | 1 | 40 | 50  | 45.0 | 450.0 | 160.0 | 290.0 | 1871.3 |
| 24 | 9 | 8  | 2 | 1 | 1 | 1 | 40 | 55  | 47.5 | 475.0 | 160.0 | 315.0 | 2186.3 |
| 24 | 9 | 9  | 2 | 1 | 1 | 1 | 45 | 50  | 47.5 | 475.0 | 202.5 | 272.5 | 2458.8 |
| 24 | 9 | 10 | 2 | 1 | 1 | 1 | 40 | 45  | 42.5 | 425.0 | 160.0 | 265.0 | 2723.8 |
| 24 | 9 | 11 | 2 | 0 | 1 | 0 | 45 | 50  | 0.0  | 405.0 | 202.5 | 202.5 | 2926.3 |
| 24 | 9 | 12 | 2 | 1 | 1 | 1 | 50 | 45  | 47.5 | 475.0 | 250.0 | 225.0 | 3151.3 |
| 24 | 9 | 13 | 2 | 1 | 1 | 1 | 23 | 45  | 34.0 | 340.0 | 52.9  | 287.1 | 3438.4 |
| 24 | 9 | 14 | 2 | 1 | 1 | 1 | 30 | 50  | 40.0 | 400.0 | 90.0  | 310.0 | 3748.4 |
| 24 | 9 | 15 | 2 | 1 | 1 | 1 | 27 | 50  | 38.5 | 385.0 | 72.9  | 312.1 | 4060.5 |
| 24 | 9 | 16 | 2 | 1 | 1 | 1 | 5  | 50  | 27.5 | 275.0 | 2.5   | 272.5 | 4333.0 |
| 24 | 9 | 17 | 2 | 1 | 1 | 1 | 20 | 50  | 35.0 | 350.0 | 40.0  | 310.0 | 4643.0 |
| 24 | 9 | 18 | 2 | 1 | 0 | 0 | 25 | 45  | 0.0  | 225.0 | 62.5  | 162.5 | 4805.5 |

|    |    |    |   |   |   |   |     |     |      |       |        |        |        |
|----|----|----|---|---|---|---|-----|-----|------|-------|--------|--------|--------|
| 24 | 9  | 19 | 2 | 1 | 1 | 1 | 25  | 50  | 37.5 | 375.0 | 62.5   | 312.5  | 5118.0 |
| 24 | 9  | 20 | 2 | 1 | 0 | 0 | 30  | 45  | 0.0  | 270.0 | 90.0   | 180.0  | 5298.0 |
| 24 | 9  | 21 | 2 | 1 | 0 | 0 | 45  | 45  | 0.0  | 405.0 | 202.5  | 202.5  | 5500.5 |
| 24 | 9  | 22 | 2 | 1 | 1 | 1 | 25  | 45  | 35.0 | 350.0 | 62.5   | 287.5  | 5788.0 |
| 24 | 9  | 23 | 2 | 1 | 0 | 0 | 50  | 45  | 0.0  | 450.0 | 250.0  | 200.0  | 5988.0 |
| 24 | 9  | 24 | 2 | 1 | 0 | 0 | 45  | 45  | 0.0  | 405.0 | 202.5  | 202.5  | 6190.5 |
| 24 | 9  | 25 | 2 | 1 | 0 | 0 | 45  | 45  | 0.0  | 405.0 | 202.5  | 202.5  | 6393.0 |
| 24 | 9  | 26 | 2 | 0 | 0 | 0 | 45  | 45  | 0.0  | 405.0 | 202.5  | 202.5  | 6595.5 |
| 24 | 9  | 27 | 2 | 1 | 0 | 0 | 45  | 45  | 0.0  | 405.0 | 202.5  | 202.5  | 6798.0 |
| 24 | 9  | 28 | 2 | 1 | 0 | 0 | 45  | 45  | 0.0  | 405.0 | 202.5  | 202.5  | 7000.5 |
| 24 | 9  | 29 | 2 | 1 | 0 | 0 | 45  | 45  | 0.0  | 405.0 | 202.5  | 202.5  | 7203.0 |
| 24 | 9  | 30 | 2 | 1 | 0 | 0 | 45  | 45  | 0.0  | 405.0 | 202.5  | 202.5  | 7405.5 |
| 18 | 10 | 1  | 2 | 0 | 0 | 0 | 50  | 20  | 0.0  | 450.0 | 250.0  | 200.0  | 200.0  |
| 18 | 10 | 2  | 2 | 0 | 1 | 0 | 15  | 100 | 0.0  | 135.0 | 22.5   | 112.5  | 312.5  |
| 18 | 10 | 3  | 2 | 0 | 0 | 0 | 90  | 20  | 0.0  | 810.0 | 810.0  | 0.0    | 312.5  |
| 18 | 10 | 4  | 2 | 0 | 0 | 0 | 100 | 50  | 0.0  | 900.0 | 1000.0 | -100.0 | 212.5  |
| 18 | 10 | 5  | 2 | 0 | 0 | 0 | 15  | 50  | 0.0  | 135.0 | 22.5   | 112.5  | 325.0  |
| 18 | 10 | 6  | 2 | 0 | 1 | 0 | 50  | 50  | 0.0  | 450.0 | 250.0  | 200.0  | 525.0  |
| 18 | 10 | 7  | 2 | 0 | 0 | 0 | 15  | 44  | 0.0  | 135.0 | 22.5   | 112.5  | 637.5  |
| 18 | 10 | 8  | 2 | 0 | 0 | 0 | 18  | 44  | 0.0  | 162.0 | 32.4   | 129.6  | 767.1  |
| 18 | 10 | 9  | 2 | 0 | 0 | 0 | 15  | 44  | 0.0  | 135.0 | 22.5   | 112.5  | 879.6  |
| 18 | 10 | 10 | 2 | 0 | 0 | 0 | 10  | 45  | 0.0  | 90.0  | 10.0   | 80.0   | 959.6  |
| 18 | 10 | 11 | 2 | 0 | 0 | 0 | 5   | 45  | 0.0  | 45.0  | 2.5    | 42.5   | 1002.1 |
| 18 | 10 | 12 | 2 | 0 | 0 | 0 | 30  | 45  | 0.0  | 270.0 | 90.0   | 180.0  | 1182.1 |
| 18 | 10 | 13 | 2 | 0 | 0 | 0 | 40  | 45  | 0.0  | 360.0 | 160.0  | 200.0  | 1382.1 |
| 18 | 10 | 14 | 2 | 0 | 0 | 0 | 40  | 45  | 0.0  | 360.0 | 160.0  | 200.0  | 1582.1 |
| 18 | 10 | 15 | 2 | 0 | 0 | 0 | 40  | 45  | 0.0  | 360.0 | 160.0  | 200.0  | 1782.1 |
| 18 | 10 | 16 | 2 | 1 | 0 | 0 | 50  | 45  | 0.0  | 450.0 | 250.0  | 200.0  | 1982.1 |
| 18 | 10 | 17 | 2 | 1 | 1 | 1 | 90  | 50  | 70.0 | 700.0 | 810.0  | -110.0 | 1872.1 |
| 18 | 10 | 18 | 2 | 0 | 1 | 0 | 50  | 45  | 0.0  | 450.0 | 250.0  | 200.0  | 2072.1 |
| 18 | 10 | 19 | 2 | 0 | 1 | 0 | 50  | 44  | 0.0  | 450.0 | 250.0  | 200.0  | 2272.1 |
| 18 | 10 | 20 | 2 | 0 | 0 | 0 | 15  | 45  | 0.0  | 135.0 | 22.5   | 112.5  | 2384.6 |
| 18 | 10 | 21 | 2 | 0 | 1 | 0 | 40  | 45  | 0.0  | 360.0 | 160.0  | 200.0  | 2584.6 |
| 18 | 10 | 22 | 2 | 0 | 1 | 0 | 40  | 45  | 0.0  | 360.0 | 160.0  | 200.0  | 2784.6 |
| 18 | 10 | 23 | 2 | 0 | 1 | 0 | 30  | 45  | 0.0  | 270.0 | 90.0   | 180.0  | 2964.6 |
| 18 | 10 | 24 | 2 | 0 | 0 | 0 | 15  | 45  | 0.0  | 135.0 | 22.5   | 112.5  | 3077.1 |
| 18 | 10 | 25 | 2 | 0 | 0 | 0 | 10  | 45  | 0.0  | 90.0  | 10.0   | 80.0   | 3157.1 |
| 18 | 10 | 26 | 2 | 0 | 1 | 0 | 40  | 45  | 0.0  | 360.0 | 160.0  | 200.0  | 3357.1 |

|    |    |    |   |   |   |   |     |     |      |       |        |        |        |
|----|----|----|---|---|---|---|-----|-----|------|-------|--------|--------|--------|
| 18 | 10 | 27 | 2 | 0 | 0 | 0 | 15  | 45  | 0.0  | 135.0 | 22.5   | 112.5  | 3469.6 |
| 18 | 10 | 28 | 2 | 0 | 0 | 0 | 15  | 45  | 0.0  | 135.0 | 22.5   | 112.5  | 3582.1 |
| 18 | 10 | 29 | 2 | 0 | 0 | 0 | 8   | 45  | 0.0  | 72.0  | 6.4    | 65.6   | 3647.7 |
| 18 | 10 | 30 | 2 | 0 | 0 | 0 | 15  | 45  | 0.0  | 135.0 | 22.5   | 112.5  | 3760.2 |
| 23 | 10 | 1  | 2 | 0 | 0 | 0 | 20  | 50  | 0.0  | 180.0 | 40.0   | 140.0  | 140.0  |
| 23 | 10 | 2  | 2 | 1 | 0 | 0 | 100 | 15  | 0.0  | 900.0 | 1000.0 | -100.0 | 40.0   |
| 23 | 10 | 3  | 2 | 0 | 0 | 0 | 20  | 90  | 0.0  | 180.0 | 40.0   | 140.0  | 180.0  |
| 23 | 10 | 4  | 2 | 0 | 0 | 0 | 50  | 100 | 0.0  | 450.0 | 250.0  | 200.0  | 380.0  |
| 23 | 10 | 5  | 2 | 0 | 0 | 0 | 50  | 15  | 0.0  | 450.0 | 250.0  | 200.0  | 580.0  |
| 23 | 10 | 6  | 2 | 1 | 0 | 0 | 50  | 50  | 0.0  | 450.0 | 250.0  | 200.0  | 780.0  |
| 23 | 10 | 7  | 2 | 0 | 0 | 0 | 44  | 15  | 0.0  | 396.0 | 193.6  | 202.4  | 982.4  |
| 23 | 10 | 8  | 2 | 0 | 0 | 0 | 44  | 18  | 0.0  | 396.0 | 193.6  | 202.4  | 1184.8 |
| 23 | 10 | 9  | 2 | 0 | 0 | 0 | 44  | 15  | 0.0  | 396.0 | 193.6  | 202.4  | 1387.2 |
| 23 | 10 | 10 | 2 | 0 | 0 | 0 | 45  | 10  | 0.0  | 405.0 | 202.5  | 202.5  | 1589.7 |
| 23 | 10 | 11 | 2 | 0 | 0 | 0 | 45  | 5   | 0.0  | 405.0 | 202.5  | 202.5  | 1792.2 |
| 23 | 10 | 12 | 2 | 0 | 0 | 0 | 45  | 30  | 0.0  | 405.0 | 202.5  | 202.5  | 1994.7 |
| 23 | 10 | 13 | 2 | 0 | 0 | 0 | 45  | 40  | 0.0  | 405.0 | 202.5  | 202.5  | 2197.2 |
| 23 | 10 | 14 | 2 | 0 | 0 | 0 | 45  | 40  | 0.0  | 405.0 | 202.5  | 202.5  | 2399.7 |
| 23 | 10 | 15 | 2 | 0 | 0 | 0 | 45  | 40  | 0.0  | 405.0 | 202.5  | 202.5  | 2602.2 |
| 23 | 10 | 16 | 2 | 0 | 1 | 0 | 45  | 50  | 0.0  | 405.0 | 202.5  | 202.5  | 2804.7 |
| 23 | 10 | 17 | 2 | 1 | 1 | 1 | 50  | 90  | 70.0 | 700.0 | 250.0  | 450.0  | 3254.7 |
| 23 | 10 | 18 | 2 | 1 | 0 | 0 | 45  | 50  | 0.0  | 405.0 | 202.5  | 202.5  | 3457.2 |
| 23 | 10 | 19 | 2 | 1 | 0 | 0 | 44  | 50  | 0.0  | 396.0 | 193.6  | 202.4  | 3659.6 |
| 23 | 10 | 20 | 2 | 0 | 0 | 0 | 45  | 15  | 0.0  | 405.0 | 202.5  | 202.5  | 3862.1 |
| 23 | 10 | 21 | 2 | 1 | 0 | 0 | 45  | 40  | 0.0  | 405.0 | 202.5  | 202.5  | 4064.6 |
| 23 | 10 | 22 | 2 | 1 | 0 | 0 | 45  | 40  | 0.0  | 405.0 | 202.5  | 202.5  | 4267.1 |
| 23 | 10 | 23 | 2 | 1 | 0 | 0 | 45  | 30  | 0.0  | 405.0 | 202.5  | 202.5  | 4469.6 |
| 23 | 10 | 24 | 2 | 0 | 0 | 0 | 45  | 15  | 0.0  | 405.0 | 202.5  | 202.5  | 4672.1 |
| 23 | 10 | 25 | 2 | 0 | 0 | 0 | 45  | 10  | 0.0  | 405.0 | 202.5  | 202.5  | 4874.6 |
| 23 | 10 | 26 | 2 | 1 | 0 | 0 | 45  | 40  | 0.0  | 405.0 | 202.5  | 202.5  | 5077.1 |
| 23 | 10 | 27 | 2 | 0 | 0 | 0 | 45  | 15  | 0.0  | 405.0 | 202.5  | 202.5  | 5279.6 |
| 23 | 10 | 28 | 2 | 0 | 0 | 0 | 45  | 15  | 0.0  | 405.0 | 202.5  | 202.5  | 5482.1 |
| 23 | 10 | 29 | 2 | 0 | 0 | 0 | 45  | 8   | 0.0  | 405.0 | 202.5  | 202.5  | 5684.6 |
| 23 | 10 | 30 | 2 | 0 | 0 | 0 | 45  | 15  | 0.0  | 405.0 | 202.5  | 202.5  | 5887.1 |
| 19 | 11 | 1  | 2 | 1 | 1 | 1 | 50  | 20  | 35.0 | 350.0 | 250.0  | 100.0  | 100.0  |
| 19 | 11 | 2  | 2 | 0 | 1 | 0 | 50  | 20  | 0.0  | 450.0 | 250.0  | 200.0  | 300.0  |
| 19 | 11 | 3  | 2 | 1 | 1 | 1 | 30  | 22  | 26.0 | 260.0 | 90.0   | 170.0  | 470.0  |
| 19 | 11 | 4  | 2 | 0 | 1 | 0 | 50  | 35  | 0.0  | 450.0 | 250.0  | 200.0  | 670.0  |

|    |    |    |   |   |   |   |    |    |      |       |       |       |        |
|----|----|----|---|---|---|---|----|----|------|-------|-------|-------|--------|
| 19 | 11 | 5  | 2 | 1 | 1 | 1 | 25 | 35 | 30.0 | 300.0 | 62.5  | 237.5 | 907.5  |
| 19 | 11 | 6  | 2 | 1 | 1 | 1 | 30 | 30 | 30.0 | 300.0 | 90.0  | 210.0 | 1117.5 |
| 19 | 11 | 7  | 2 | 1 | 0 | 0 | 35 | 45 | 0.0  | 315.0 | 122.5 | 192.5 | 1310.0 |
| 19 | 11 | 8  | 2 | 1 | 1 | 1 | 35 | 33 | 34.0 | 340.0 | 122.5 | 217.5 | 1527.5 |
| 19 | 11 | 9  | 2 | 1 | 1 | 1 | 30 | 38 | 34.0 | 340.0 | 90.0  | 250.0 | 1777.5 |
| 19 | 11 | 10 | 2 | 1 | 1 | 1 | 30 | 37 | 33.5 | 335.0 | 90.0  | 245.0 | 2022.5 |
| 19 | 11 | 11 | 2 | 1 | 1 | 1 | 35 | 30 | 32.5 | 325.0 | 122.5 | 202.5 | 2225.0 |
| 19 | 11 | 12 | 2 | 1 | 1 | 1 | 30 | 33 | 31.5 | 315.0 | 90.0  | 225.0 | 2450.0 |
| 19 | 11 | 13 | 2 | 1 | 1 | 1 | 33 | 33 | 33.0 | 330.0 | 108.9 | 221.1 | 2671.1 |
| 19 | 11 | 14 | 2 | 1 | 1 | 1 | 33 | 34 | 33.5 | 335.0 | 108.9 | 226.1 | 2897.2 |
| 19 | 11 | 15 | 2 | 1 | 1 | 1 | 34 | 34 | 34.0 | 340.0 | 115.6 | 224.4 | 3121.6 |
| 19 | 11 | 16 | 2 | 1 | 1 | 1 | 35 | 35 | 35.0 | 350.0 | 122.5 | 227.5 | 3349.1 |
| 19 | 11 | 17 | 2 | 1 | 1 | 1 | 36 | 36 | 36.0 | 360.0 | 129.6 | 230.4 | 3579.5 |
| 19 | 11 | 18 | 2 | 1 | 1 | 1 | 37 | 37 | 37.0 | 370.0 | 136.9 | 233.1 | 3812.6 |
| 19 | 11 | 19 | 2 | 1 | 1 | 1 | 40 | 38 | 39.0 | 390.0 | 160.0 | 230.0 | 4042.6 |
| 19 | 11 | 20 | 2 | 1 | 1 | 1 | 40 | 40 | 40.0 | 400.0 | 160.0 | 240.0 | 4282.6 |
| 19 | 11 | 21 | 2 | 1 | 1 | 1 | 43 | 43 | 43.0 | 430.0 | 184.9 | 245.1 | 4527.7 |
| 19 | 11 | 22 | 2 | 1 | 1 | 1 | 46 | 45 | 45.5 | 455.0 | 211.6 | 243.4 | 4771.1 |
| 19 | 11 | 23 | 2 | 1 | 1 | 1 | 46 | 45 | 45.5 | 455.0 | 211.6 | 243.4 | 5014.5 |
| 19 | 11 | 24 | 2 | 1 | 1 | 1 | 46 | 46 | 46.0 | 460.0 | 211.6 | 248.4 | 5262.9 |
| 19 | 11 | 25 | 2 | 1 | 1 | 1 | 48 | 45 | 46.5 | 465.0 | 230.4 | 234.6 | 5497.5 |
| 19 | 11 | 26 | 2 | 1 | 1 | 1 | 45 | 45 | 45.0 | 450.0 | 202.5 | 247.5 | 5745.0 |
| 19 | 11 | 27 | 2 | 1 | 1 | 1 | 46 | 46 | 46.0 | 460.0 | 211.6 | 248.4 | 5993.4 |
| 19 | 11 | 28 | 2 | 1 | 1 | 1 | 40 | 48 | 44.0 | 440.0 | 160.0 | 280.0 | 6273.4 |
| 19 | 11 | 29 | 2 | 0 | 1 | 0 | 50 | 45 | 0.0  | 450.0 | 250.0 | 200.0 | 6473.4 |
| 19 | 11 | 30 | 2 | 0 | 0 | 0 | 50 | 45 | 0.0  | 450.0 | 250.0 | 200.0 | 6673.4 |
| 22 | 11 | 1  | 2 | 1 | 1 | 1 | 20 | 50 | 35.0 | 350.0 | 40.0  | 310.0 | 310.0  |
| 22 | 11 | 2  | 2 | 1 | 0 | 0 | 20 | 50 | 0.0  | 180.0 | 40.0  | 140.0 | 450.0  |
| 22 | 11 | 3  | 2 | 1 | 1 | 1 | 22 | 30 | 26.0 | 260.0 | 48.4  | 211.6 | 661.6  |
| 22 | 11 | 4  | 2 | 1 | 0 | 0 | 35 | 50 | 0.0  | 315.0 | 122.5 | 192.5 | 854.1  |
| 22 | 11 | 5  | 2 | 1 | 1 | 1 | 35 | 25 | 30.0 | 300.0 | 122.5 | 177.5 | 1031.6 |
| 22 | 11 | 6  | 2 | 1 | 1 | 1 | 30 | 30 | 30.0 | 300.0 | 90.0  | 210.0 | 1241.6 |
| 22 | 11 | 7  | 2 | 0 | 1 | 0 | 45 | 35 | 0.0  | 405.0 | 202.5 | 202.5 | 1444.1 |
| 22 | 11 | 8  | 2 | 1 | 1 | 1 | 33 | 35 | 34.0 | 340.0 | 108.9 | 231.1 | 1675.2 |
| 22 | 11 | 9  | 2 | 1 | 1 | 1 | 38 | 30 | 34.0 | 340.0 | 144.4 | 195.6 | 1870.8 |
| 22 | 11 | 10 | 2 | 1 | 1 | 1 | 37 | 30 | 33.5 | 335.0 | 136.9 | 198.1 | 2068.9 |
| 22 | 11 | 11 | 2 | 1 | 1 | 1 | 30 | 35 | 32.5 | 325.0 | 90.0  | 235.0 | 2303.9 |
| 22 | 11 | 12 | 2 | 1 | 1 | 1 | 33 | 30 | 31.5 | 315.0 | 108.9 | 206.1 | 2510.0 |

|    |    |    |   |   |   |   |    |    |      |       |       |       |        |
|----|----|----|---|---|---|---|----|----|------|-------|-------|-------|--------|
| 22 | 11 | 13 | 2 | 1 | 1 | 1 | 33 | 33 | 33.0 | 330.0 | 108.9 | 221.1 | 2731.1 |
| 22 | 11 | 14 | 2 | 1 | 1 | 1 | 34 | 33 | 33.5 | 335.0 | 115.6 | 219.4 | 2950.5 |
| 22 | 11 | 15 | 2 | 1 | 1 | 1 | 34 | 34 | 34.0 | 340.0 | 115.6 | 224.4 | 3174.9 |
| 22 | 11 | 16 | 2 | 1 | 1 | 1 | 35 | 35 | 35.0 | 350.0 | 122.5 | 227.5 | 3402.4 |
| 22 | 11 | 17 | 2 | 1 | 1 | 1 | 36 | 36 | 36.0 | 360.0 | 129.6 | 230.4 | 3632.8 |
| 22 | 11 | 18 | 2 | 1 | 1 | 1 | 37 | 37 | 37.0 | 370.0 | 136.9 | 233.1 | 3865.9 |
| 22 | 11 | 19 | 2 | 1 | 1 | 1 | 38 | 40 | 39.0 | 390.0 | 144.4 | 245.6 | 4111.5 |
| 22 | 11 | 20 | 2 | 1 | 1 | 1 | 40 | 40 | 40.0 | 400.0 | 160.0 | 240.0 | 4351.5 |
| 22 | 11 | 21 | 2 | 1 | 1 | 1 | 43 | 43 | 43.0 | 430.0 | 184.9 | 245.1 | 4596.6 |
| 22 | 11 | 22 | 2 | 1 | 1 | 1 | 45 | 46 | 45.5 | 455.0 | 202.5 | 252.5 | 4849.1 |
| 22 | 11 | 23 | 2 | 1 | 1 | 1 | 45 | 46 | 45.5 | 455.0 | 202.5 | 252.5 | 5101.6 |
| 22 | 11 | 24 | 2 | 1 | 1 | 1 | 46 | 46 | 46.0 | 460.0 | 211.6 | 248.4 | 5350.0 |
| 22 | 11 | 25 | 2 | 1 | 1 | 1 | 45 | 48 | 46.5 | 465.0 | 202.5 | 262.5 | 5612.5 |
| 22 | 11 | 26 | 2 | 1 | 1 | 1 | 45 | 45 | 45.0 | 450.0 | 202.5 | 247.5 | 5860.0 |
| 22 | 11 | 27 | 2 | 1 | 1 | 1 | 46 | 46 | 46.0 | 460.0 | 211.6 | 248.4 | 6108.4 |
| 22 | 11 | 28 | 2 | 1 | 1 | 1 | 48 | 40 | 44.0 | 440.0 | 230.4 | 209.6 | 6318.0 |
| 22 | 11 | 29 | 2 | 1 | 0 | 0 | 45 | 50 | 0.0  | 405.0 | 202.5 | 202.5 | 6520.5 |
| 22 | 11 | 30 | 2 | 0 | 0 | 0 | 45 | 50 | 0.0  | 405.0 | 202.5 | 202.5 | 6723.0 |
| 20 | 12 | 1  | 2 | 1 | 1 | 1 | 50 | 45 | 47.5 | 475.0 | 250.0 | 225.0 | 225.0  |
| 20 | 12 | 2  | 2 | 1 | 1 | 1 | 50 | 45 | 47.5 | 475.0 | 250.0 | 225.0 | 450.0  |
| 20 | 12 | 3  | 2 | 1 | 1 | 1 | 55 | 48 | 51.5 | 515.0 | 302.5 | 212.5 | 662.5  |
| 20 | 12 | 4  | 2 | 1 | 1 | 1 | 48 | 48 | 48.0 | 480.0 | 230.4 | 249.6 | 912.1  |
| 20 | 12 | 5  | 2 | 1 | 1 | 1 | 48 | 46 | 47.0 | 470.0 | 230.4 | 239.6 | 1151.7 |
| 20 | 12 | 6  | 2 | 1 | 1 | 1 | 48 | 47 | 47.5 | 475.0 | 230.4 | 244.6 | 1396.3 |
| 20 | 12 | 7  | 2 | 1 | 1 | 1 | 47 | 47 | 47.0 | 470.0 | 220.9 | 249.1 | 1645.4 |
| 20 | 12 | 8  | 2 | 1 | 1 | 1 | 47 | 48 | 47.5 | 475.0 | 220.9 | 254.1 | 1899.5 |
| 20 | 12 | 9  | 2 | 1 | 1 | 1 | 47 | 46 | 46.5 | 465.0 | 220.9 | 244.1 | 2143.6 |
| 20 | 12 | 10 | 2 | 1 | 1 | 1 | 47 | 46 | 46.5 | 465.0 | 220.9 | 244.1 | 2387.7 |
| 20 | 12 | 11 | 2 | 1 | 1 | 1 | 45 | 46 | 45.5 | 455.0 | 202.5 | 252.5 | 2640.2 |
| 20 | 12 | 12 | 2 | 1 | 1 | 1 | 45 | 47 | 46.0 | 460.0 | 202.5 | 257.5 | 2897.7 |
| 20 | 12 | 13 | 2 | 1 | 1 | 1 | 45 | 46 | 45.5 | 455.0 | 202.5 | 252.5 | 3150.2 |
| 20 | 12 | 14 | 2 | 1 | 1 | 1 | 45 | 46 | 45.5 | 455.0 | 202.5 | 252.5 | 3402.7 |
| 20 | 12 | 15 | 2 | 1 | 1 | 1 | 45 | 44 | 44.5 | 445.0 | 202.5 | 242.5 | 3645.2 |
| 20 | 12 | 16 | 2 | 1 | 1 | 1 | 45 | 45 | 45.0 | 450.0 | 202.5 | 247.5 | 3892.7 |
| 20 | 12 | 17 | 2 | 1 | 1 | 1 | 45 | 45 | 45.0 | 450.0 | 202.5 | 247.5 | 4140.2 |
| 20 | 12 | 18 | 2 | 1 | 1 | 1 | 46 | 46 | 46.0 | 460.0 | 211.6 | 248.4 | 4388.6 |
| 20 | 12 | 19 | 2 | 1 | 1 | 1 | 46 | 45 | 45.5 | 455.0 | 211.6 | 243.4 | 4632.0 |
| 20 | 12 | 20 | 2 | 1 | 1 | 1 | 45 | 45 | 45.0 | 450.0 | 202.5 | 247.5 | 4879.5 |

|    |    |    |   |   |   |   |    |    |      |       |       |       |        |
|----|----|----|---|---|---|---|----|----|------|-------|-------|-------|--------|
| 20 | 12 | 21 | 2 | 1 | 1 | 1 | 45 | 46 | 45.5 | 455.0 | 202.5 | 252.5 | 5132.0 |
| 20 | 12 | 22 | 2 | 1 | 1 | 1 | 45 | 45 | 45.0 | 450.0 | 202.5 | 247.5 | 5379.5 |
| 20 | 12 | 23 | 2 | 1 | 1 | 1 | 45 | 45 | 45.0 | 450.0 | 202.5 | 247.5 | 5627.0 |
| 20 | 12 | 24 | 2 | 1 | 1 | 1 | 45 | 45 | 45.0 | 450.0 | 202.5 | 247.5 | 5874.5 |
| 20 | 12 | 25 | 2 | 1 | 1 | 1 | 45 | 45 | 45.0 | 450.0 | 202.5 | 247.5 | 6122.0 |
| 20 | 12 | 26 | 2 | 1 | 1 | 1 | 45 | 45 | 45.0 | 450.0 | 202.5 | 247.5 | 6369.5 |
| 20 | 12 | 27 | 2 | 1 | 1 | 1 | 45 | 45 | 45.0 | 450.0 | 202.5 | 247.5 | 6617.0 |
| 20 | 12 | 28 | 2 | 1 | 1 | 1 | 45 | 45 | 45.0 | 450.0 | 202.5 | 247.5 | 6864.5 |
| 20 | 12 | 29 | 2 | 1 | 1 | 1 | 45 | 45 | 45.0 | 450.0 | 202.5 | 247.5 | 7112.0 |
| 20 | 12 | 30 | 2 | 1 | 1 | 1 | 45 | 45 | 45.0 | 450.0 | 202.5 | 247.5 | 7359.5 |
| 21 | 12 | 1  | 2 | 1 | 1 | 1 | 45 | 50 | 47.5 | 475.0 | 202.5 | 272.5 | 272.5  |
| 21 | 12 | 2  | 2 | 1 | 1 | 1 | 45 | 50 | 47.5 | 475.0 | 202.5 | 272.5 | 545.0  |
| 21 | 12 | 3  | 2 | 1 | 1 | 1 | 48 | 55 | 51.5 | 515.0 | 230.4 | 284.6 | 829.6  |
| 21 | 12 | 4  | 2 | 1 | 1 | 1 | 48 | 48 | 48.0 | 480.0 | 230.4 | 249.6 | 1079.2 |
| 21 | 12 | 5  | 2 | 1 | 1 | 1 | 46 | 48 | 47.0 | 470.0 | 211.6 | 258.4 | 1337.6 |
| 21 | 12 | 6  | 2 | 1 | 1 | 1 | 47 | 48 | 47.5 | 475.0 | 220.9 | 254.1 | 1591.7 |
| 21 | 12 | 7  | 2 | 1 | 1 | 1 | 47 | 47 | 47.0 | 470.0 | 220.9 | 249.1 | 1840.8 |
| 21 | 12 | 8  | 2 | 1 | 1 | 1 | 48 | 47 | 47.5 | 475.0 | 230.4 | 244.6 | 2085.4 |
| 21 | 12 | 9  | 2 | 1 | 1 | 1 | 46 | 47 | 46.5 | 465.0 | 211.6 | 253.4 | 2338.8 |
| 21 | 12 | 10 | 2 | 1 | 1 | 1 | 46 | 47 | 46.5 | 465.0 | 211.6 | 253.4 | 2592.2 |
| 21 | 12 | 11 | 2 | 1 | 1 | 1 | 46 | 45 | 45.5 | 455.0 | 211.6 | 243.4 | 2835.6 |
| 21 | 12 | 12 | 2 | 1 | 1 | 1 | 47 | 45 | 46.0 | 460.0 | 220.9 | 239.1 | 3074.7 |
| 21 | 12 | 13 | 2 | 1 | 1 | 1 | 46 | 45 | 45.5 | 455.0 | 211.6 | 243.4 | 3318.1 |
| 21 | 12 | 14 | 2 | 1 | 1 | 1 | 46 | 45 | 45.5 | 455.0 | 211.6 | 243.4 | 3561.5 |
| 21 | 12 | 15 | 2 | 1 | 1 | 1 | 44 | 45 | 44.5 | 445.0 | 193.6 | 251.4 | 3812.9 |
| 21 | 12 | 16 | 2 | 1 | 1 | 1 | 45 | 45 | 45.0 | 450.0 | 202.5 | 247.5 | 4060.4 |
| 21 | 12 | 17 | 2 | 1 | 1 | 1 | 45 | 45 | 45.0 | 450.0 | 202.5 | 247.5 | 4307.9 |
| 21 | 12 | 18 | 2 | 1 | 1 | 1 | 46 | 46 | 46.0 | 460.0 | 211.6 | 248.4 | 4556.3 |
| 21 | 12 | 19 | 2 | 1 | 1 | 1 | 45 | 46 | 45.5 | 455.0 | 202.5 | 252.5 | 4808.8 |
| 21 | 12 | 20 | 2 | 1 | 1 | 1 | 45 | 45 | 45.0 | 450.0 | 202.5 | 247.5 | 5056.3 |
| 21 | 12 | 21 | 2 | 1 | 1 | 1 | 46 | 45 | 45.5 | 455.0 | 211.6 | 243.4 | 5299.7 |
| 21 | 12 | 22 | 2 | 1 | 1 | 1 | 45 | 45 | 45.0 | 450.0 | 202.5 | 247.5 | 5547.2 |
| 21 | 12 | 23 | 2 | 1 | 1 | 1 | 45 | 45 | 45.0 | 450.0 | 202.5 | 247.5 | 5794.7 |
| 21 | 12 | 24 | 2 | 1 | 1 | 1 | 45 | 45 | 45.0 | 450.0 | 202.5 | 247.5 | 6042.2 |
| 21 | 12 | 25 | 2 | 1 | 1 | 1 | 45 | 45 | 45.0 | 450.0 | 202.5 | 247.5 | 6289.7 |
| 21 | 12 | 26 | 2 | 1 | 1 | 1 | 45 | 45 | 45.0 | 450.0 | 202.5 | 247.5 | 6537.2 |
| 21 | 12 | 27 | 2 | 1 | 1 | 1 | 45 | 45 | 45.0 | 450.0 | 202.5 | 247.5 | 6784.7 |
| 21 | 12 | 28 | 2 | 1 | 1 | 1 | 45 | 45 | 45.0 | 450.0 | 202.5 | 247.5 | 7032.2 |

|    |    |    |   |   |   |   |     |     |      |       |        |        |        |
|----|----|----|---|---|---|---|-----|-----|------|-------|--------|--------|--------|
| 21 | 12 | 29 | 2 | 1 | 1 | 1 | 45  | 45  | 45.0 | 450.0 | 202.5  | 247.5  | 7279.7 |
| 21 | 12 | 30 | 2 | 1 | 1 | 1 | 45  | 45  | 45.0 | 450.0 | 202.5  | 247.5  | 7527.2 |
| 25 | 13 | 1  | 2 | 0 | 0 | 0 | 75  | 30  | 0.0  | 675.0 | 562.5  | 112.5  | 112.5  |
| 25 | 13 | 2  | 2 | 1 | 0 | 0 | 80  | 50  | 0.0  | 720.0 | 640.0  | 80.0   | 192.5  |
| 25 | 13 | 3  | 2 | 0 | 1 | 0 | 100 | 60  | 0.0  | 900.0 | 1000.0 | -100.0 | 92.5   |
| 25 | 13 | 4  | 2 | 1 | 1 | 1 | 80  | 50  | 65.0 | 650.0 | 640.0  | 10.0   | 102.5  |
| 25 | 13 | 5  | 2 | 1 | 1 | 1 | 30  | 80  | 55.0 | 550.0 | 90.0   | 460.0  | 562.5  |
| 25 | 13 | 6  | 2 | 1 | 1 | 1 | 20  | 50  | 35.0 | 350.0 | 40.0   | 310.0  | 872.5  |
| 25 | 13 | 7  | 2 | 1 | 1 | 1 | 50  | 44  | 47.0 | 470.0 | 250.0  | 220.0  | 1092.5 |
| 25 | 13 | 8  | 2 | 0 | 1 | 0 | 50  | 45  | 0.0  | 450.0 | 250.0  | 200.0  | 1292.5 |
| 25 | 13 | 9  | 2 | 1 | 1 | 1 | 20  | 45  | 32.5 | 325.0 | 40.0   | 285.0  | 1577.5 |
| 25 | 13 | 10 | 2 | 1 | 1 | 1 | 10  | 45  | 27.5 | 275.0 | 10.0   | 265.0  | 1842.5 |
| 25 | 13 | 11 | 2 | 1 | 0 | 0 | 50  | 45  | 0.0  | 450.0 | 250.0  | 200.0  | 2042.5 |
| 25 | 13 | 12 | 2 | 0 | 1 | 0 | 45  | 45  | 0.0  | 405.0 | 202.5  | 202.5  | 2245.0 |
| 25 | 13 | 13 | 2 | 1 | 1 | 1 | 10  | 45  | 27.5 | 275.0 | 10.0   | 265.0  | 2510.0 |
| 25 | 13 | 14 | 2 | 1 | 0 | 0 | 45  | 45  | 0.0  | 405.0 | 202.5  | 202.5  | 2712.5 |
| 25 | 13 | 15 | 2 | 0 | 1 | 0 | 46  | 45  | 0.0  | 414.0 | 211.6  | 202.4  | 2914.9 |
| 25 | 13 | 16 | 2 | 1 | 1 | 1 | 10  | 45  | 27.5 | 275.0 | 10.0   | 265.0  | 3179.9 |
| 25 | 13 | 17 | 2 | 1 | 1 | 1 | 10  | 20  | 15.0 | 150.0 | 10.0   | 140.0  | 3319.9 |
| 25 | 13 | 18 | 2 | 0 | 0 | 0 | 45  | 45  | 0.0  | 405.0 | 202.5  | 202.5  | 3522.4 |
| 25 | 13 | 19 | 2 | 1 | 1 | 1 | 30  | 10  | 20.0 | 200.0 | 90.0   | 110.0  | 3632.4 |
| 25 | 13 | 20 | 2 | 1 | 1 | 1 | 5   | 10  | 7.5  | 75.0  | 2.5    | 72.5   | 3704.9 |
| 25 | 13 | 21 | 2 | 0 | 0 | 0 | 45  | 45  | 0.0  | 405.0 | 202.5  | 202.5  | 3907.4 |
| 25 | 13 | 22 | 2 | 0 | 0 | 0 | 44  | 45  | 0.0  | 396.0 | 193.6  | 202.4  | 4109.8 |
| 25 | 13 | 23 | 2 | 0 | 1 | 0 | 45  | 45  | 0.0  | 405.0 | 202.5  | 202.5  | 4312.3 |
| 25 | 13 | 24 | 2 | 1 | 1 | 1 | 10  | 10  | 10.0 | 100.0 | 10.0   | 90.0   | 4402.3 |
| 25 | 13 | 25 | 2 | 0 | 0 | 0 | 45  | 45  | 0.0  | 405.0 | 202.5  | 202.5  | 4604.8 |
| 25 | 13 | 26 | 2 | 1 | 0 | 0 | 40  | 45  | 0.0  | 360.0 | 160.0  | 200.0  | 4804.8 |
| 25 | 13 | 27 | 2 | 1 | 0 | 0 | 44  | 45  | 0.0  | 396.0 | 193.6  | 202.4  | 5007.2 |
| 25 | 13 | 28 | 2 | 1 | 1 | 1 | 0   | 10  | 5.0  | 50.0  | 0.0    | 50.0   | 5057.2 |
| 25 | 13 | 29 | 2 | 0 | 0 | 0 | 45  | 45  | 0.0  | 405.0 | 202.5  | 202.5  | 5259.7 |
| 25 | 13 | 30 | 2 | 0 | 0 | 0 | 45  | 45  | 0.0  | 405.0 | 202.5  | 202.5  | 5462.2 |
| 32 | 13 | 1  | 2 | 0 | 0 | 0 | 30  | 75  | 0.0  | 270.0 | 90.0   | 180.0  | 180.0  |
| 32 | 13 | 2  | 2 | 0 | 1 | 0 | 50  | 80  | 0.0  | 450.0 | 250.0  | 200.0  | 380.0  |
| 32 | 13 | 3  | 2 | 1 | 0 | 0 | 60  | 100 | 0.0  | 540.0 | 360.0  | 180.0  | 560.0  |
| 32 | 13 | 4  | 2 | 1 | 1 | 1 | 50  | 80  | 65.0 | 650.0 | 250.0  | 400.0  | 960.0  |
| 32 | 13 | 5  | 2 | 1 | 1 | 1 | 80  | 30  | 55.0 | 550.0 | 640.0  | -90.0  | 870.0  |
| 32 | 13 | 6  | 2 | 1 | 1 | 1 | 50  | 20  | 35.0 | 350.0 | 250.0  | 100.0  | 970.0  |



|    |    |    |   |   |   |   |    |    |      |       |       |       |        |
|----|----|----|---|---|---|---|----|----|------|-------|-------|-------|--------|
| 32 | 13 | 7  | 2 | 1 | 1 | 1 | 44 | 50 | 47.0 | 470.0 | 193.6 | 276.4 | 1246.4 |
| 32 | 13 | 8  | 2 | 1 | 0 | 0 | 45 | 50 | 0.0  | 405.0 | 202.5 | 202.5 | 1448.9 |
| 32 | 13 | 9  | 2 | 1 | 1 | 1 | 45 | 20 | 32.5 | 325.0 | 202.5 | 122.5 | 1571.4 |
| 32 | 13 | 10 | 2 | 1 | 1 | 1 | 45 | 10 | 27.5 | 275.0 | 202.5 | 72.5  | 1643.9 |
| 32 | 13 | 11 | 2 | 0 | 1 | 0 | 45 | 50 | 0.0  | 405.0 | 202.5 | 202.5 | 1846.4 |
| 32 | 13 | 12 | 2 | 1 | 0 | 0 | 45 | 45 | 0.0  | 405.0 | 202.5 | 202.5 | 2048.9 |
| 32 | 13 | 13 | 2 | 1 | 1 | 1 | 45 | 10 | 27.5 | 275.0 | 202.5 | 72.5  | 2121.4 |
| 32 | 13 | 14 | 2 | 0 | 1 | 0 | 45 | 45 | 0.0  | 405.0 | 202.5 | 202.5 | 2323.9 |
| 32 | 13 | 15 | 2 | 1 | 0 | 0 | 45 | 46 | 0.0  | 405.0 | 202.5 | 202.5 | 2526.4 |
| 32 | 13 | 16 | 2 | 1 | 1 | 1 | 45 | 10 | 27.5 | 275.0 | 202.5 | 72.5  | 2598.9 |
| 32 | 13 | 17 | 2 | 1 | 1 | 1 | 20 | 10 | 15.0 | 150.0 | 40.0  | 110.0 | 2708.9 |
| 32 | 13 | 18 | 2 | 0 | 0 | 0 | 45 | 45 | 0.0  | 405.0 | 202.5 | 202.5 | 2911.4 |
| 32 | 13 | 19 | 2 | 1 | 1 | 1 | 10 | 30 | 20.0 | 200.0 | 10.0  | 190.0 | 3101.4 |
| 32 | 13 | 20 | 2 | 1 | 1 | 1 | 10 | 5  | 7.5  | 75.0  | 10.0  | 65.0  | 3166.4 |
| 32 | 13 | 21 | 2 | 0 | 0 | 0 | 45 | 45 | 0.0  | 405.0 | 202.5 | 202.5 | 3368.9 |
| 32 | 13 | 22 | 2 | 0 | 0 | 0 | 45 | 44 | 0.0  | 405.0 | 202.5 | 202.5 | 3571.4 |
| 32 | 13 | 23 | 2 | 1 | 0 | 0 | 45 | 45 | 0.0  | 405.0 | 202.5 | 202.5 | 3773.9 |
| 32 | 13 | 24 | 2 | 1 | 1 | 1 | 10 | 10 | 10.0 | 100.0 | 10.0  | 90.0  | 3863.9 |
| 32 | 13 | 25 | 2 | 0 | 0 | 0 | 45 | 45 | 0.0  | 405.0 | 202.5 | 202.5 | 4066.4 |
| 32 | 13 | 26 | 2 | 0 | 1 | 0 | 45 | 40 | 0.0  | 405.0 | 202.5 | 202.5 | 4268.9 |
| 32 | 13 | 27 | 2 | 0 | 1 | 0 | 45 | 44 | 0.0  | 405.0 | 202.5 | 202.5 | 4471.4 |
| 32 | 13 | 28 | 2 | 1 | 1 | 1 | 10 | 0  | 5.0  | 50.0  | 10.0  | 40.0  | 4511.4 |
| 32 | 13 | 29 | 2 | 0 | 0 | 0 | 45 | 45 | 0.0  | 405.0 | 202.5 | 202.5 | 4713.9 |
| 32 | 13 | 30 | 2 | 0 | 0 | 0 | 45 | 45 | 0.0  | 405.0 | 202.5 | 202.5 | 4916.4 |
| 26 | 14 | 1  | 2 | 0 | 0 | 0 | 37 | 50 | 0.0  | 333.0 | 136.9 | 196.1 | 196.1  |
| 26 | 14 | 2  | 2 | 0 | 0 | 0 | 34 | 45 | 0.0  | 306.0 | 115.6 | 190.4 | 386.5  |
| 26 | 14 | 3  | 2 | 0 | 0 | 0 | 39 | 45 | 0.0  | 351.0 | 152.1 | 198.9 | 585.4  |
| 26 | 14 | 4  | 2 | 0 | 0 | 0 | 41 | 45 | 0.0  | 369.0 | 168.1 | 200.9 | 786.3  |
| 26 | 14 | 5  | 2 | 0 | 1 | 0 | 42 | 45 | 0.0  | 378.0 | 176.4 | 201.6 | 987.9  |
| 26 | 14 | 6  | 2 | 0 | 1 | 0 | 42 | 45 | 0.0  | 378.0 | 176.4 | 201.6 | 1189.5 |
| 26 | 14 | 7  | 2 | 0 | 1 | 0 | 37 | 45 | 0.0  | 333.0 | 136.9 | 196.1 | 1385.6 |
| 26 | 14 | 8  | 2 | 1 | 1 | 1 | 15 | 45 | 30.0 | 300.0 | 22.5  | 277.5 | 1663.1 |
| 26 | 14 | 9  | 2 | 1 | 0 | 0 | 13 | 45 | 0.0  | 117.0 | 16.9  | 100.1 | 1763.2 |
| 26 | 14 | 10 | 2 | 0 | 0 | 0 | 32 | 45 | 0.0  | 288.0 | 102.4 | 185.6 | 1948.8 |
| 26 | 14 | 11 | 2 | 1 | 1 | 1 | 10 | 45 | 27.5 | 275.0 | 10.0  | 265.0 | 2213.8 |
| 26 | 14 | 12 | 2 | 1 | 0 | 0 | 18 | 45 | 0.0  | 162.0 | 32.4  | 129.6 | 2343.4 |
| 26 | 14 | 13 | 2 | 0 | 0 | 0 | 40 | 45 | 0.0  | 360.0 | 160.0 | 200.0 | 2543.4 |
| 26 | 14 | 14 | 2 | 0 | 0 | 0 | 47 | 45 | 0.0  | 423.0 | 220.9 | 202.1 | 2745.5 |

|    |    |    |   |   |   |   |    |    |      |       |       |       |        |
|----|----|----|---|---|---|---|----|----|------|-------|-------|-------|--------|
| 26 | 14 | 15 | 2 | 0 | 0 | 0 | 49 | 45 | 0.0  | 441.0 | 240.1 | 200.9 | 2946.4 |
| 26 | 14 | 16 | 2 | 0 | 0 | 0 | 40 | 45 | 0.0  | 360.0 | 160.0 | 200.0 | 3146.4 |
| 26 | 14 | 17 | 2 | 0 | 0 | 0 | 37 | 45 | 0.0  | 333.0 | 136.9 | 196.1 | 3342.5 |
| 26 | 14 | 18 | 2 | 0 | 1 | 0 | 45 | 45 | 0.0  | 405.0 | 202.5 | 202.5 | 3545.0 |
| 26 | 14 | 19 | 2 | 1 | 1 | 1 | 12 | 45 | 28.5 | 285.0 | 14.4  | 270.6 | 3815.6 |
| 26 | 14 | 20 | 2 | 1 | 1 | 1 | 15 | 10 | 12.5 | 125.0 | 22.5  | 102.5 | 3918.1 |
| 26 | 14 | 21 | 2 | 0 | 0 | 0 | 46 | 45 | 0.0  | 414.0 | 211.6 | 202.4 | 4120.5 |
| 26 | 14 | 22 | 2 | 0 | 0 | 0 | 48 | 45 | 0.0  | 432.0 | 230.4 | 201.6 | 4322.1 |
| 26 | 14 | 23 | 2 | 0 | 1 | 0 | 35 | 45 | 0.0  | 315.0 | 122.5 | 192.5 | 4514.6 |
| 26 | 14 | 24 | 2 | 0 | 0 | 0 | 32 | 45 | 0.0  | 288.0 | 102.4 | 185.6 | 4700.2 |
| 26 | 14 | 25 | 2 | 0 | 0 | 0 | 48 | 45 | 0.0  | 432.0 | 230.4 | 201.6 | 4901.8 |
| 26 | 14 | 26 | 2 | 0 | 1 | 0 | 47 | 45 | 0.0  | 423.0 | 220.9 | 202.1 | 5103.9 |
| 26 | 14 | 27 | 2 | 0 | 0 | 0 | 47 | 45 | 0.0  | 423.0 | 220.9 | 202.1 | 5306.0 |
| 26 | 14 | 28 | 2 | 0 | 0 | 0 | 49 | 45 | 0.0  | 441.0 | 240.1 | 200.9 | 5506.9 |
| 26 | 14 | 29 | 2 | 1 | 0 | 0 | 10 | 45 | 0.0  | 90.0  | 10.0  | 80.0  | 5586.9 |
| 26 | 14 | 30 | 2 | 0 | 0 | 0 | 30 | 45 | 0.0  | 270.0 | 90.0  | 180.0 | 5766.9 |
| 31 | 14 | 1  | 2 | 0 | 0 | 0 | 50 | 37 | 0.0  | 450.0 | 250.0 | 200.0 | 200.0  |
| 31 | 14 | 2  | 2 | 0 | 0 | 0 | 45 | 34 | 0.0  | 405.0 | 202.5 | 202.5 | 402.5  |
| 31 | 14 | 3  | 2 | 0 | 0 | 0 | 45 | 39 | 0.0  | 405.0 | 202.5 | 202.5 | 605.0  |
| 31 | 14 | 4  | 2 | 0 | 0 | 0 | 45 | 41 | 0.0  | 405.0 | 202.5 | 202.5 | 807.5  |
| 31 | 14 | 5  | 2 | 1 | 0 | 0 | 45 | 42 | 0.0  | 405.0 | 202.5 | 202.5 | 1010.0 |
| 31 | 14 | 6  | 2 | 1 | 0 | 0 | 45 | 42 | 0.0  | 405.0 | 202.5 | 202.5 | 1212.5 |
| 31 | 14 | 7  | 2 | 1 | 0 | 0 | 45 | 37 | 0.0  | 405.0 | 202.5 | 202.5 | 1415.0 |
| 31 | 14 | 8  | 2 | 1 | 1 | 1 | 45 | 15 | 30.0 | 300.0 | 202.5 | 97.5  | 1512.5 |
| 31 | 14 | 9  | 2 | 0 | 1 | 0 | 45 | 13 | 0.0  | 405.0 | 202.5 | 202.5 | 1715.0 |
| 31 | 14 | 10 | 2 | 0 | 0 | 0 | 45 | 32 | 0.0  | 405.0 | 202.5 | 202.5 | 1917.5 |
| 31 | 14 | 11 | 2 | 1 | 1 | 1 | 45 | 10 | 27.5 | 275.0 | 202.5 | 72.5  | 1990.0 |
| 31 | 14 | 12 | 2 | 0 | 1 | 0 | 45 | 18 | 0.0  | 405.0 | 202.5 | 202.5 | 2192.5 |
| 31 | 14 | 13 | 2 | 0 | 0 | 0 | 45 | 40 | 0.0  | 405.0 | 202.5 | 202.5 | 2395.0 |
| 31 | 14 | 14 | 2 | 0 | 0 | 0 | 45 | 47 | 0.0  | 405.0 | 202.5 | 202.5 | 2597.5 |
| 31 | 14 | 15 | 2 | 0 | 0 | 0 | 45 | 49 | 0.0  | 405.0 | 202.5 | 202.5 | 2800.0 |
| 31 | 14 | 16 | 2 | 0 | 0 | 0 | 45 | 40 | 0.0  | 405.0 | 202.5 | 202.5 | 3002.5 |
| 31 | 14 | 17 | 2 | 0 | 0 | 0 | 45 | 37 | 0.0  | 405.0 | 202.5 | 202.5 | 3205.0 |
| 31 | 14 | 18 | 2 | 1 | 0 | 0 | 45 | 45 | 0.0  | 405.0 | 202.5 | 202.5 | 3407.5 |
| 31 | 14 | 19 | 2 | 1 | 1 | 1 | 45 | 12 | 28.5 | 285.0 | 202.5 | 82.5  | 3490.0 |
| 31 | 14 | 20 | 2 | 1 | 1 | 1 | 10 | 15 | 12.5 | 125.0 | 10.0  | 115.0 | 3605.0 |
| 31 | 14 | 21 | 2 | 0 | 0 | 0 | 45 | 46 | 0.0  | 405.0 | 202.5 | 202.5 | 3807.5 |
| 31 | 14 | 22 | 2 | 0 | 0 | 0 | 45 | 48 | 0.0  | 405.0 | 202.5 | 202.5 | 4010.0 |

|    |    |    |   |   |   |   |    |    |      |       |       |       |        |
|----|----|----|---|---|---|---|----|----|------|-------|-------|-------|--------|
| 31 | 14 | 23 | 2 | 1 | 0 | 0 | 45 | 35 | 0.0  | 405.0 | 202.5 | 202.5 | 4212.5 |
| 31 | 14 | 24 | 2 | 0 | 0 | 0 | 45 | 32 | 0.0  | 405.0 | 202.5 | 202.5 | 4415.0 |
| 31 | 14 | 25 | 2 | 0 | 0 | 0 | 45 | 48 | 0.0  | 405.0 | 202.5 | 202.5 | 4617.5 |
| 31 | 14 | 26 | 2 | 1 | 0 | 0 | 45 | 47 | 0.0  | 405.0 | 202.5 | 202.5 | 4820.0 |
| 31 | 14 | 27 | 2 | 0 | 0 | 0 | 45 | 47 | 0.0  | 405.0 | 202.5 | 202.5 | 5022.5 |
| 31 | 14 | 28 | 2 | 0 | 0 | 0 | 45 | 49 | 0.0  | 405.0 | 202.5 | 202.5 | 5225.0 |
| 31 | 14 | 29 | 2 | 0 | 1 | 0 | 45 | 10 | 0.0  | 405.0 | 202.5 | 202.5 | 5427.5 |
| 31 | 14 | 30 | 2 | 0 | 0 | 0 | 45 | 30 | 0.0  | 405.0 | 202.5 | 202.5 | 5630.0 |
| 27 | 15 | 1  | 2 | 0 | 1 | 0 | 45 | 50 | 0.0  | 405.0 | 202.5 | 202.5 | 202.5  |
| 27 | 15 | 2  | 2 | 0 | 1 | 0 | 45 | 25 | 0.0  | 405.0 | 202.5 | 202.5 | 405.0  |
| 27 | 15 | 3  | 2 | 0 | 0 | 0 | 45 | 60 | 0.0  | 405.0 | 202.5 | 202.5 | 607.5  |
| 27 | 15 | 4  | 2 | 1 | 1 | 1 | 45 | 55 | 50.0 | 500.0 | 202.5 | 297.5 | 905.0  |
| 27 | 15 | 5  | 2 | 1 | 1 | 1 | 45 | 60 | 52.5 | 525.0 | 202.5 | 322.5 | 1227.5 |
| 27 | 15 | 6  | 2 | 1 | 1 | 1 | 45 | 45 | 45.0 | 450.0 | 202.5 | 247.5 | 1475.0 |
| 27 | 15 | 7  | 2 | 1 | 1 | 1 | 45 | 45 | 45.0 | 450.0 | 202.5 | 247.5 | 1722.5 |
| 27 | 15 | 8  | 2 | 1 | 1 | 1 | 55 | 50 | 52.5 | 525.0 | 302.5 | 222.5 | 1945.0 |
| 27 | 15 | 9  | 2 | 1 | 1 | 1 | 45 | 55 | 50.0 | 500.0 | 202.5 | 297.5 | 2242.5 |
| 27 | 15 | 10 | 2 | 1 | 1 | 1 | 45 | 50 | 47.5 | 475.0 | 202.5 | 272.5 | 2515.0 |
| 27 | 15 | 11 | 2 | 1 | 1 | 1 | 45 | 40 | 42.5 | 425.0 | 202.5 | 222.5 | 2737.5 |
| 27 | 15 | 12 | 2 | 1 | 1 | 1 | 45 | 45 | 45.0 | 450.0 | 202.5 | 247.5 | 2985.0 |
| 27 | 15 | 13 | 2 | 1 | 1 | 1 | 45 | 45 | 45.0 | 450.0 | 202.5 | 247.5 | 3232.5 |
| 27 | 15 | 14 | 2 | 1 | 1 | 1 | 45 | 45 | 45.0 | 450.0 | 202.5 | 247.5 | 3480.0 |
| 27 | 15 | 15 | 2 | 1 | 1 | 1 | 55 | 45 | 50.0 | 500.0 | 302.5 | 197.5 | 3677.5 |
| 27 | 15 | 16 | 2 | 1 | 1 | 1 | 45 | 50 | 47.5 | 475.0 | 202.5 | 272.5 | 3950.0 |
| 27 | 15 | 17 | 2 | 1 | 1 | 1 | 45 | 46 | 45.5 | 455.0 | 202.5 | 252.5 | 4202.5 |
| 27 | 15 | 18 | 2 | 1 | 1 | 1 | 45 | 40 | 42.5 | 425.0 | 202.5 | 222.5 | 4425.0 |
| 27 | 15 | 19 | 2 | 1 | 1 | 1 | 45 | 45 | 45.0 | 450.0 | 202.5 | 247.5 | 4672.5 |
| 27 | 15 | 20 | 2 | 1 | 1 | 1 | 45 | 44 | 44.5 | 445.0 | 202.5 | 242.5 | 4915.0 |
| 27 | 15 | 21 | 2 | 1 | 1 | 1 | 45 | 45 | 45.0 | 450.0 | 202.5 | 247.5 | 5162.5 |
| 27 | 15 | 22 | 2 | 1 | 1 | 1 | 45 | 43 | 44.0 | 440.0 | 202.5 | 237.5 | 5400.0 |
| 27 | 15 | 23 | 2 | 1 | 1 | 1 | 45 | 45 | 45.0 | 450.0 | 202.5 | 247.5 | 5647.5 |
| 27 | 15 | 24 | 2 | 1 | 1 | 1 | 45 | 45 | 45.0 | 450.0 | 202.5 | 247.5 | 5895.0 |
| 27 | 15 | 25 | 2 | 1 | 1 | 1 | 45 | 40 | 42.5 | 425.0 | 202.5 | 222.5 | 6117.5 |
| 27 | 15 | 26 | 2 | 1 | 1 | 1 | 52 | 45 | 48.5 | 485.0 | 270.4 | 214.6 | 6332.1 |
| 27 | 15 | 27 | 2 | 1 | 1 | 1 | 46 | 45 | 45.5 | 455.0 | 211.6 | 243.4 | 6575.5 |
| 27 | 15 | 28 | 2 | 1 | 1 | 1 | 45 | 40 | 42.5 | 425.0 | 202.5 | 222.5 | 6798.0 |
| 27 | 15 | 29 | 2 | 1 | 1 | 1 | 45 | 30 | 37.5 | 375.0 | 202.5 | 172.5 | 6970.5 |
| 27 | 15 | 30 | 2 | 1 | 1 | 1 | 45 | 1  | 23.0 | 230.0 | 202.5 | 27.5  | 6998.0 |

|    |    |    |   |   |   |   |    |     |      |       |       |       |        |
|----|----|----|---|---|---|---|----|-----|------|-------|-------|-------|--------|
| 30 | 15 | 1  | 2 | 1 | 0 | 0 | 50 | 45  | 0.0  | 450.0 | 250.0 | 200.0 | 200.0  |
| 30 | 15 | 2  | 2 | 1 | 0 | 0 | 25 | 45  | 0.0  | 225.0 | 62.5  | 162.5 | 362.5  |
| 30 | 15 | 3  | 2 | 0 | 0 | 0 | 60 | 45  | 0.0  | 540.0 | 360.0 | 180.0 | 542.5  |
| 30 | 15 | 4  | 2 | 1 | 1 | 1 | 55 | 45  | 50.0 | 500.0 | 302.5 | 197.5 | 740.0  |
| 30 | 15 | 5  | 2 | 1 | 1 | 1 | 60 | 45  | 52.5 | 525.0 | 360.0 | 165.0 | 905.0  |
| 30 | 15 | 6  | 2 | 1 | 1 | 1 | 45 | 45  | 45.0 | 450.0 | 202.5 | 247.5 | 1152.5 |
| 30 | 15 | 7  | 2 | 1 | 1 | 1 | 45 | 45  | 45.0 | 450.0 | 202.5 | 247.5 | 1400.0 |
| 30 | 15 | 8  | 2 | 1 | 1 | 1 | 50 | 55  | 52.5 | 525.0 | 250.0 | 275.0 | 1675.0 |
| 30 | 15 | 9  | 2 | 1 | 1 | 1 | 55 | 45  | 50.0 | 500.0 | 302.5 | 197.5 | 1872.5 |
| 30 | 15 | 10 | 2 | 1 | 1 | 1 | 50 | 45  | 47.5 | 475.0 | 250.0 | 225.0 | 2097.5 |
| 30 | 15 | 11 | 2 | 1 | 1 | 1 | 40 | 45  | 42.5 | 425.0 | 160.0 | 265.0 | 2362.5 |
| 30 | 15 | 12 | 2 | 1 | 1 | 1 | 45 | 45  | 45.0 | 450.0 | 202.5 | 247.5 | 2610.0 |
| 30 | 15 | 13 | 2 | 1 | 1 | 1 | 45 | 45  | 45.0 | 450.0 | 202.5 | 247.5 | 2857.5 |
| 30 | 15 | 14 | 2 | 1 | 1 | 1 | 45 | 45  | 45.0 | 450.0 | 202.5 | 247.5 | 3105.0 |
| 30 | 15 | 15 | 2 | 1 | 1 | 1 | 45 | 55  | 50.0 | 500.0 | 202.5 | 297.5 | 3402.5 |
| 30 | 15 | 16 | 2 | 1 | 1 | 1 | 50 | 45  | 47.5 | 475.0 | 250.0 | 225.0 | 3627.5 |
| 30 | 15 | 17 | 2 | 1 | 1 | 1 | 46 | 45  | 45.5 | 455.0 | 211.6 | 243.4 | 3870.9 |
| 30 | 15 | 18 | 2 | 1 | 1 | 1 | 40 | 45  | 42.5 | 425.0 | 160.0 | 265.0 | 4135.9 |
| 30 | 15 | 19 | 2 | 1 | 1 | 1 | 45 | 45  | 45.0 | 450.0 | 202.5 | 247.5 | 4383.4 |
| 30 | 15 | 20 | 2 | 1 | 1 | 1 | 44 | 45  | 44.5 | 445.0 | 193.6 | 251.4 | 4634.8 |
| 30 | 15 | 21 | 2 | 1 | 1 | 1 | 45 | 45  | 45.0 | 450.0 | 202.5 | 247.5 | 4882.3 |
| 30 | 15 | 22 | 2 | 1 | 1 | 1 | 43 | 45  | 44.0 | 440.0 | 184.9 | 255.1 | 5137.4 |
| 30 | 15 | 23 | 2 | 1 | 1 | 1 | 45 | 45  | 45.0 | 450.0 | 202.5 | 247.5 | 5384.9 |
| 30 | 15 | 24 | 2 | 1 | 1 | 1 | 45 | 45  | 45.0 | 450.0 | 202.5 | 247.5 | 5632.4 |
| 30 | 15 | 25 | 2 | 1 | 1 | 1 | 40 | 45  | 42.5 | 425.0 | 160.0 | 265.0 | 5897.4 |
| 30 | 15 | 26 | 2 | 1 | 1 | 1 | 45 | 52  | 48.5 | 485.0 | 202.5 | 282.5 | 6179.9 |
| 30 | 15 | 27 | 2 | 1 | 1 | 1 | 45 | 46  | 45.5 | 455.0 | 202.5 | 252.5 | 6432.4 |
| 30 | 15 | 28 | 2 | 1 | 1 | 1 | 40 | 45  | 42.5 | 425.0 | 160.0 | 265.0 | 6697.4 |
| 30 | 15 | 29 | 2 | 1 | 1 | 1 | 30 | 45  | 37.5 | 375.0 | 90.0  | 285.0 | 6982.4 |
| 30 | 15 | 30 | 2 | 1 | 1 | 1 | 1  | 45  | 23.0 | 230.0 | 0.1   | 229.9 | 7212.3 |
| 28 | 16 | 1  | 2 | 1 | 1 | 1 | 50 | 50  | 50.0 | 500.0 | 250.0 | 250.0 | 250.0  |
| 28 | 16 | 2  | 2 | 1 | 1 | 1 | 60 | 50  | 55.0 | 550.0 | 360.0 | 190.0 | 440.0  |
| 28 | 16 | 3  | 2 | 1 | 1 | 1 | 70 | 70  | 70.0 | 700.0 | 490.0 | 210.0 | 650.0  |
| 28 | 16 | 4  | 2 | 1 | 1 | 1 | 50 | 80  | 65.0 | 650.0 | 250.0 | 400.0 | 1050.0 |
| 28 | 16 | 5  | 2 | 1 | 1 | 1 | 60 | 50  | 55.0 | 550.0 | 360.0 | 190.0 | 1240.0 |
| 28 | 16 | 6  | 2 | 1 | 1 | 1 | 75 | 45  | 60.0 | 600.0 | 562.5 | 37.5  | 1277.5 |
| 28 | 16 | 7  | 2 | 1 | 1 | 1 | 30 | 30  | 30.0 | 300.0 | 90.0  | 210.0 | 1487.5 |
| 28 | 16 | 8  | 2 | 1 | 0 | 0 | 5  | 100 | 0.0  | 45.0  | 2.5   | 42.5  | 1530.0 |

|    |    |    |   |   |   |   |     |     |      |       |        |        |        |
|----|----|----|---|---|---|---|-----|-----|------|-------|--------|--------|--------|
| 28 | 16 | 9  | 2 | 1 | 0 | 0 | 50  | 50  | 0.0  | 450.0 | 250.0  | 200.0  | 1730.0 |
| 28 | 16 | 10 | 2 | 1 | 0 | 0 | 50  | 56  | 0.0  | 450.0 | 250.0  | 200.0  | 1930.0 |
| 28 | 16 | 11 | 2 | 1 | 0 | 0 | 100 | 45  | 0.0  | 900.0 | 1000.0 | -100.0 | 1830.0 |
| 28 | 16 | 12 | 2 | 1 | 0 | 0 | 50  | 45  | 0.0  | 450.0 | 250.0  | 200.0  | 2030.0 |
| 28 | 16 | 13 | 2 | 1 | 1 | 1 | 50  | 45  | 47.5 | 475.0 | 250.0  | 225.0  | 2255.0 |
| 28 | 16 | 14 | 2 | 1 | 0 | 0 | 50  | 45  | 0.0  | 450.0 | 250.0  | 200.0  | 2455.0 |
| 28 | 16 | 15 | 2 | 1 | 1 | 1 | 60  | 45  | 52.5 | 525.0 | 360.0  | 165.0  | 2620.0 |
| 28 | 16 | 16 | 2 | 1 | 1 | 1 | 55  | 40  | 47.5 | 475.0 | 302.5  | 172.5  | 2792.5 |
| 28 | 16 | 17 | 2 | 1 | 1 | 1 | 50  | 30  | 40.0 | 400.0 | 250.0  | 150.0  | 2942.5 |
| 28 | 16 | 18 | 2 | 1 | 1 | 1 | 70  | 40  | 55.0 | 550.0 | 490.0  | 60.0   | 3002.5 |
| 28 | 16 | 19 | 2 | 1 | 1 | 1 | 50  | 35  | 42.5 | 425.0 | 250.0  | 175.0  | 3177.5 |
| 28 | 16 | 20 | 2 | 1 | 1 | 1 | 50  | 30  | 40.0 | 400.0 | 250.0  | 150.0  | 3327.5 |
| 28 | 16 | 21 | 2 | 1 | 1 | 1 | 50  | 30  | 40.0 | 400.0 | 250.0  | 150.0  | 3477.5 |
| 28 | 16 | 22 | 2 | 1 | 1 | 1 | 40  | 30  | 35.0 | 350.0 | 160.0  | 190.0  | 3667.5 |
| 28 | 16 | 23 | 2 | 0 | 0 | 0 | 50  | 45  | 0.0  | 450.0 | 250.0  | 200.0  | 3867.5 |
| 28 | 16 | 24 | 2 | 0 | 0 | 0 | 50  | 45  | 0.0  | 450.0 | 250.0  | 200.0  | 4067.5 |
| 28 | 16 | 25 | 2 | 0 | 0 | 0 | 50  | 45  | 0.0  | 450.0 | 250.0  | 200.0  | 4267.5 |
| 28 | 16 | 26 | 2 | 1 | 0 | 0 | 50  | 45  | 0.0  | 450.0 | 250.0  | 200.0  | 4467.5 |
| 28 | 16 | 27 | 2 | 1 | 1 | 1 | 50  | 10  | 30.0 | 300.0 | 250.0  | 50.0   | 4517.5 |
| 28 | 16 | 28 | 2 | 0 | 1 | 0 | 50  | 1   | 0.0  | 450.0 | 250.0  | 200.0  | 4717.5 |
| 28 | 16 | 29 | 2 | 0 | 0 | 0 | 50  | 45  | 0.0  | 450.0 | 250.0  | 200.0  | 4917.5 |
| 28 | 16 | 30 | 2 | 0 | 0 | 0 | 50  | 45  | 0.0  | 450.0 | 250.0  | 200.0  | 5117.5 |
| 29 | 16 | 1  | 2 | 1 | 1 | 1 | 50  | 50  | 50.0 | 500.0 | 250.0  | 250.0  | 250.0  |
| 29 | 16 | 2  | 2 | 1 | 1 | 1 | 50  | 60  | 55.0 | 550.0 | 250.0  | 300.0  | 550.0  |
| 29 | 16 | 3  | 2 | 1 | 1 | 1 | 70  | 70  | 70.0 | 700.0 | 490.0  | 210.0  | 760.0  |
| 29 | 16 | 4  | 2 | 1 | 1 | 1 | 80  | 50  | 65.0 | 650.0 | 640.0  | 10.0   | 770.0  |
| 29 | 16 | 5  | 2 | 1 | 1 | 1 | 50  | 60  | 55.0 | 550.0 | 250.0  | 300.0  | 1070.0 |
| 29 | 16 | 6  | 2 | 1 | 1 | 1 | 45  | 75  | 60.0 | 600.0 | 202.5  | 397.5  | 1467.5 |
| 29 | 16 | 7  | 2 | 1 | 1 | 1 | 30  | 30  | 30.0 | 300.0 | 90.0   | 210.0  | 1677.5 |
| 29 | 16 | 8  | 2 | 0 | 1 | 0 | 100 | 5   | 0.0  | 900.0 | 1000.0 | -100.0 | 1577.5 |
| 29 | 16 | 9  | 2 | 0 | 1 | 0 | 50  | 50  | 0.0  | 450.0 | 250.0  | 200.0  | 1777.5 |
| 29 | 16 | 10 | 2 | 0 | 1 | 0 | 56  | 50  | 0.0  | 504.0 | 313.6  | 190.4  | 1967.9 |
| 29 | 16 | 11 | 2 | 0 | 1 | 0 | 45  | 100 | 0.0  | 405.0 | 202.5  | 202.5  | 2170.4 |
| 29 | 16 | 12 | 2 | 0 | 1 | 0 | 45  | 50  | 0.0  | 405.0 | 202.5  | 202.5  | 2372.9 |
| 29 | 16 | 13 | 2 | 1 | 1 | 1 | 45  | 50  | 47.5 | 475.0 | 202.5  | 272.5  | 2645.4 |
| 29 | 16 | 14 | 2 | 0 | 1 | 0 | 45  | 50  | 0.0  | 405.0 | 202.5  | 202.5  | 2847.9 |
| 29 | 16 | 15 | 2 | 1 | 1 | 1 | 45  | 60  | 52.5 | 525.0 | 202.5  | 322.5  | 3170.4 |
| 29 | 16 | 16 | 2 | 1 | 1 | 1 | 40  | 55  | 47.5 | 475.0 | 160.0  | 315.0  | 3485.4 |

|    |    |    |   |   |   |   |    |    |      |       |       |       |        |
|----|----|----|---|---|---|---|----|----|------|-------|-------|-------|--------|
| 29 | 16 | 17 | 2 | 1 | 1 | 1 | 30 | 50 | 40.0 | 400.0 | 90.0  | 310.0 | 3795.4 |
| 29 | 16 | 18 | 2 | 1 | 1 | 1 | 40 | 70 | 55.0 | 550.0 | 160.0 | 390.0 | 4185.4 |
| 29 | 16 | 19 | 2 | 1 | 1 | 1 | 35 | 50 | 42.5 | 425.0 | 122.5 | 302.5 | 4487.9 |
| 29 | 16 | 20 | 2 | 1 | 1 | 1 | 30 | 50 | 40.0 | 400.0 | 90.0  | 310.0 | 4797.9 |
| 29 | 16 | 21 | 2 | 1 | 1 | 1 | 30 | 50 | 40.0 | 400.0 | 90.0  | 310.0 | 5107.9 |
| 29 | 16 | 22 | 2 | 1 | 1 | 1 | 30 | 40 | 35.0 | 350.0 | 90.0  | 260.0 | 5367.9 |
| 29 | 16 | 23 | 2 | 0 | 0 | 0 | 45 | 50 | 0.0  | 405.0 | 202.5 | 202.5 | 5570.4 |
| 29 | 16 | 24 | 2 | 0 | 0 | 0 | 45 | 50 | 0.0  | 405.0 | 202.5 | 202.5 | 5772.9 |
| 29 | 16 | 25 | 2 | 0 | 0 | 0 | 45 | 50 | 0.0  | 405.0 | 202.5 | 202.5 | 5975.4 |
| 29 | 16 | 26 | 2 | 0 | 1 | 0 | 45 | 50 | 0.0  | 405.0 | 202.5 | 202.5 | 6177.9 |
| 29 | 16 | 27 | 2 | 1 | 1 | 1 | 10 | 50 | 30.0 | 300.0 | 10.0  | 290.0 | 6467.9 |
| 29 | 16 | 28 | 2 | 1 | 0 | 0 | 1  | 50 | 0.0  | 9.0   | 0.1   | 8.9   | 6476.8 |
| 29 | 16 | 29 | 2 | 0 | 0 | 0 | 45 | 50 | 0.0  | 405.0 | 202.5 | 202.5 | 6679.3 |
| 29 | 16 | 30 | 2 | 0 | 0 | 0 | 45 | 50 | 0.0  | 405.0 | 202.5 | 202.5 | 6881.8 |
| 33 | 17 | 1  | 3 | 0 | 1 | 0 | 15 | 66 | 0.0  | 135.0 | 22.5  | 112.5 | 112.5  |
| 33 | 17 | 2  | 3 | 1 | 0 | 0 | 25 | 66 | 0.0  | 225.0 | 62.5  | 162.5 | 275.0  |
| 33 | 17 | 3  | 3 | 1 | 1 | 1 | 45 | 75 | 60.0 | 600.0 | 202.5 | 397.5 | 672.5  |
| 33 | 17 | 4  | 3 | 1 | 1 | 1 | 30 | 60 | 45.0 | 450.0 | 90.0  | 360.0 | 1032.5 |
| 33 | 17 | 5  | 3 | 1 | 0 | 0 | 44 | 70 | 0.0  | 396.0 | 193.6 | 202.4 | 1234.9 |
| 33 | 17 | 6  | 3 | 1 | 0 | 0 | 45 | 70 | 0.0  | 405.0 | 202.5 | 202.5 | 1437.4 |
| 33 | 17 | 7  | 3 | 0 | 1 | 0 | 45 | 70 | 0.0  | 405.0 | 202.5 | 202.5 | 1639.9 |
| 33 | 17 | 8  | 3 | 1 | 0 | 0 | 45 | 66 | 0.0  | 405.0 | 202.5 | 202.5 | 1842.4 |
| 33 | 17 | 9  | 3 | 1 | 1 | 1 | 40 | 66 | 53.0 | 530.0 | 160.0 | 370.0 | 2212.4 |
| 33 | 17 | 10 | 3 | 1 | 1 | 1 | 45 | 70 | 57.5 | 575.0 | 202.5 | 372.5 | 2584.9 |
| 33 | 17 | 11 | 3 | 1 | 1 | 1 | 40 | 60 | 50.0 | 500.0 | 160.0 | 340.0 | 2924.9 |
| 33 | 17 | 12 | 3 | 1 | 1 | 1 | 40 | 55 | 47.5 | 475.0 | 160.0 | 315.0 | 3239.9 |
| 33 | 17 | 13 | 3 | 1 | 1 | 1 | 45 | 80 | 62.5 | 625.0 | 202.5 | 422.5 | 3662.4 |
| 33 | 17 | 14 | 3 | 1 | 1 | 1 | 45 | 60 | 52.5 | 525.0 | 202.5 | 322.5 | 3984.9 |
| 33 | 17 | 15 | 3 | 1 | 1 | 1 | 40 | 65 | 52.5 | 525.0 | 160.0 | 365.0 | 4349.9 |
| 33 | 17 | 16 | 3 | 1 | 1 | 1 | 40 | 60 | 50.0 | 500.0 | 160.0 | 340.0 | 4689.9 |
| 33 | 17 | 17 | 3 | 1 | 1 | 1 | 40 | 75 | 57.5 | 575.0 | 160.0 | 415.0 | 5104.9 |
| 33 | 17 | 18 | 3 | 1 | 1 | 1 | 45 | 55 | 50.0 | 500.0 | 202.5 | 297.5 | 5402.4 |
| 33 | 17 | 19 | 3 | 1 | 1 | 1 | 40 | 57 | 48.5 | 485.0 | 160.0 | 325.0 | 5727.4 |
| 33 | 17 | 20 | 3 | 1 | 1 | 1 | 42 | 59 | 50.5 | 505.0 | 176.4 | 328.6 | 6056.0 |
| 33 | 17 | 21 | 3 | 1 | 1 | 1 | 45 | 53 | 49.0 | 490.0 | 202.5 | 287.5 | 6343.5 |
| 33 | 17 | 22 | 3 | 1 | 1 | 1 | 41 | 61 | 51.0 | 510.0 | 168.1 | 341.9 | 6685.4 |
| 33 | 17 | 23 | 3 | 1 | 1 | 1 | 40 | 55 | 47.5 | 475.0 | 160.0 | 315.0 | 7000.4 |
| 33 | 17 | 24 | 3 | 1 | 1 | 1 | 43 | 57 | 50.0 | 500.0 | 184.9 | 315.1 | 7315.5 |

|    |    |    |   |   |   |   |    |    |      |       |       |       |        |
|----|----|----|---|---|---|---|----|----|------|-------|-------|-------|--------|
| 33 | 17 | 25 | 3 | 1 | 1 | 1 | 40 | 58 | 49.0 | 490.0 | 160.0 | 330.0 | 7645.5 |
| 33 | 17 | 26 | 3 | 1 | 1 | 1 | 40 | 61 | 50.5 | 505.0 | 160.0 | 345.0 | 7990.5 |
| 33 | 17 | 27 | 3 | 1 | 1 | 1 | 40 | 59 | 49.5 | 495.0 | 160.0 | 335.0 | 8325.5 |
| 33 | 17 | 28 | 3 | 1 | 1 | 1 | 43 | 58 | 50.5 | 505.0 | 184.9 | 320.1 | 8645.6 |
| 33 | 17 | 29 | 3 | 1 | 1 | 1 | 45 | 56 | 50.5 | 505.0 | 202.5 | 302.5 | 8948.1 |
| 33 | 17 | 30 | 3 | 1 | 1 | 1 | 40 | 54 | 47.0 | 470.0 | 160.0 | 310.0 | 9258.1 |
| 40 | 17 | 1  | 3 | 1 | 0 | 0 | 66 | 15 | 0.0  | 594.0 | 435.6 | 158.4 | 158.4  |
| 40 | 17 | 2  | 3 | 0 | 1 | 0 | 66 | 25 | 0.0  | 594.0 | 435.6 | 158.4 | 316.8  |
| 40 | 17 | 3  | 3 | 1 | 1 | 1 | 75 | 45 | 60.0 | 600.0 | 562.5 | 37.5  | 354.3  |
| 40 | 17 | 4  | 3 | 1 | 1 | 1 | 60 | 30 | 45.0 | 450.0 | 360.0 | 90.0  | 444.3  |
| 40 | 17 | 5  | 3 | 0 | 1 | 0 | 70 | 44 | 0.0  | 630.0 | 490.0 | 140.0 | 584.3  |
| 40 | 17 | 6  | 3 | 0 | 1 | 0 | 70 | 45 | 0.0  | 630.0 | 490.0 | 140.0 | 724.3  |
| 40 | 17 | 7  | 3 | 1 | 0 | 0 | 70 | 45 | 0.0  | 630.0 | 490.0 | 140.0 | 864.3  |
| 40 | 17 | 8  | 3 | 0 | 1 | 0 | 66 | 45 | 0.0  | 594.0 | 435.6 | 158.4 | 1022.7 |
| 40 | 17 | 9  | 3 | 1 | 1 | 1 | 66 | 40 | 53.0 | 530.0 | 435.6 | 94.4  | 1117.1 |
| 40 | 17 | 10 | 3 | 1 | 1 | 1 | 70 | 45 | 57.5 | 575.0 | 490.0 | 85.0  | 1202.1 |
| 40 | 17 | 11 | 3 | 1 | 1 | 1 | 60 | 40 | 50.0 | 500.0 | 360.0 | 140.0 | 1342.1 |
| 40 | 17 | 12 | 3 | 1 | 1 | 1 | 55 | 40 | 47.5 | 475.0 | 302.5 | 172.5 | 1514.6 |
| 40 | 17 | 13 | 3 | 1 | 1 | 1 | 80 | 45 | 62.5 | 625.0 | 640.0 | -15.0 | 1499.6 |
| 40 | 17 | 14 | 3 | 1 | 1 | 1 | 60 | 45 | 52.5 | 525.0 | 360.0 | 165.0 | 1664.6 |
| 40 | 17 | 15 | 3 | 1 | 1 | 1 | 65 | 40 | 52.5 | 525.0 | 422.5 | 102.5 | 1767.1 |
| 40 | 17 | 16 | 3 | 1 | 1 | 1 | 60 | 40 | 50.0 | 500.0 | 360.0 | 140.0 | 1907.1 |
| 40 | 17 | 17 | 3 | 1 | 1 | 1 | 75 | 40 | 57.5 | 575.0 | 562.5 | 12.5  | 1919.6 |
| 40 | 17 | 18 | 3 | 1 | 1 | 1 | 55 | 45 | 50.0 | 500.0 | 302.5 | 197.5 | 2117.1 |
| 40 | 17 | 19 | 3 | 1 | 1 | 1 | 57 | 40 | 48.5 | 485.0 | 324.9 | 160.1 | 2277.2 |
| 40 | 17 | 20 | 3 | 1 | 1 | 1 | 59 | 42 | 50.5 | 505.0 | 348.1 | 156.9 | 2434.1 |
| 40 | 17 | 21 | 3 | 1 | 1 | 1 | 53 | 45 | 49.0 | 490.0 | 280.9 | 209.1 | 2643.2 |
| 40 | 17 | 22 | 3 | 1 | 1 | 1 | 61 | 41 | 51.0 | 510.0 | 372.1 | 137.9 | 2781.1 |
| 40 | 17 | 23 | 3 | 1 | 1 | 1 | 55 | 40 | 47.5 | 475.0 | 302.5 | 172.5 | 2953.6 |
| 40 | 17 | 24 | 3 | 1 | 1 | 1 | 57 | 43 | 50.0 | 500.0 | 324.9 | 175.1 | 3128.7 |
| 40 | 17 | 25 | 3 | 1 | 1 | 1 | 58 | 40 | 49.0 | 490.0 | 336.4 | 153.6 | 3282.3 |
| 40 | 17 | 26 | 3 | 1 | 1 | 1 | 61 | 40 | 50.5 | 505.0 | 372.1 | 132.9 | 3415.2 |
| 40 | 17 | 27 | 3 | 1 | 1 | 1 | 59 | 40 | 49.5 | 495.0 | 348.1 | 146.9 | 3562.1 |
| 40 | 17 | 28 | 3 | 1 | 1 | 1 | 58 | 43 | 50.5 | 505.0 | 336.4 | 168.6 | 3730.7 |
| 40 | 17 | 29 | 3 | 1 | 1 | 1 | 56 | 45 | 50.5 | 505.0 | 313.6 | 191.4 | 3922.1 |
| 40 | 17 | 30 | 3 | 1 | 1 | 1 | 54 | 40 | 47.0 | 470.0 | 291.6 | 178.4 | 4100.5 |
| 34 | 18 | 1  | 3 | 0 | 0 | 0 | 40 | 4  | 0.0  | 360.0 | 160.0 | 200.0 | 200.0  |
| 34 | 18 | 2  | 3 | 0 | 0 | 0 | 45 | 1  | 0.0  | 405.0 | 202.5 | 202.5 | 402.5  |

|    |    |    |   |   |   |   |    |    |      |       |       |       |        |
|----|----|----|---|---|---|---|----|----|------|-------|-------|-------|--------|
| 34 | 18 | 3  | 3 | 0 | 1 | 0 | 30 | 4  | 0.0  | 270.0 | 90.0  | 180.0 | 582.5  |
| 34 | 18 | 4  | 3 | 0 | 0 | 0 | 30 | 30 | 0.0  | 270.0 | 90.0  | 180.0 | 762.5  |
| 34 | 18 | 5  | 3 | 1 | 0 | 0 | 41 | 22 | 0.0  | 369.0 | 168.1 | 200.9 | 963.4  |
| 34 | 18 | 6  | 3 | 0 | 0 | 0 | 35 | 10 | 0.0  | 315.0 | 122.5 | 192.5 | 1155.9 |
| 34 | 18 | 7  | 3 | 1 | 1 | 1 | 47 | 11 | 29.0 | 290.0 | 220.9 | 69.1  | 1225.0 |
| 34 | 18 | 8  | 3 | 0 | 0 | 0 | 40 | 15 | 0.0  | 360.0 | 160.0 | 200.0 | 1425.0 |
| 34 | 18 | 9  | 3 | 0 | 1 | 0 | 48 | 34 | 0.0  | 432.0 | 230.4 | 201.6 | 1626.6 |
| 34 | 18 | 10 | 3 | 0 | 0 | 0 | 28 | 33 | 0.0  | 252.0 | 78.4  | 173.6 | 1800.2 |
| 34 | 18 | 11 | 3 | 0 | 1 | 0 | 29 | 2  | 0.0  | 261.0 | 84.1  | 176.9 | 1977.1 |
| 34 | 18 | 12 | 3 | 1 | 0 | 0 | 32 | 55 | 0.0  | 288.0 | 102.4 | 185.6 | 2162.7 |
| 34 | 18 | 13 | 3 | 1 | 0 | 0 | 15 | 25 | 0.0  | 135.0 | 22.5  | 112.5 | 2275.2 |
| 34 | 18 | 14 | 3 | 1 | 0 | 0 | 40 | 6  | 0.0  | 360.0 | 160.0 | 200.0 | 2475.2 |
| 34 | 18 | 15 | 3 | 0 | 1 | 0 | 42 | 60 | 0.0  | 378.0 | 176.4 | 201.6 | 2676.8 |
| 34 | 18 | 16 | 3 | 0 | 0 | 0 | 55 | 60 | 0.0  | 495.0 | 302.5 | 192.5 | 2869.3 |
| 34 | 18 | 17 | 3 | 0 | 0 | 0 | 65 | 70 | 0.0  | 585.0 | 422.5 | 162.5 | 3031.8 |
| 34 | 18 | 18 | 3 | 0 | 1 | 0 | 70 | 13 | 0.0  | 630.0 | 490.0 | 140.0 | 3171.8 |
| 34 | 18 | 19 | 3 | 1 | 1 | 1 | 55 | 85 | 70.0 | 700.0 | 302.5 | 397.5 | 3569.3 |
| 34 | 18 | 20 | 3 | 1 | 0 | 0 | 74 | 12 | 0.0  | 666.0 | 547.6 | 118.4 | 3687.7 |
| 34 | 18 | 21 | 3 | 0 | 0 | 0 | 80 | 15 | 0.0  | 720.0 | 640.0 | 80.0  | 3767.7 |
| 34 | 18 | 22 | 3 | 0 | 1 | 0 | 90 | 3  | 0.0  | 810.0 | 810.0 | 0.0   | 3767.7 |
| 34 | 18 | 23 | 3 | 1 | 0 | 0 | 90 | 25 | 0.0  | 810.0 | 810.0 | 0.0   | 3767.7 |
| 34 | 18 | 24 | 3 | 0 | 0 | 0 | 42 | 22 | 0.0  | 378.0 | 176.4 | 201.6 | 3969.3 |
| 34 | 18 | 25 | 3 | 1 | 0 | 0 | 55 | 5  | 0.0  | 495.0 | 302.5 | 192.5 | 4161.8 |
| 34 | 18 | 26 | 3 | 1 | 1 | 1 | 67 | 65 | 66.0 | 660.0 | 448.9 | 211.1 | 4372.9 |
| 34 | 18 | 27 | 3 | 0 | 0 | 0 | 50 | 7  | 0.0  | 450.0 | 250.0 | 200.0 | 4572.9 |
| 34 | 18 | 28 | 3 | 0 | 0 | 0 | 63 | 32 | 0.0  | 567.0 | 396.9 | 170.1 | 4743.0 |
| 34 | 18 | 29 | 3 | 1 | 1 | 1 | 49 | 27 | 38.0 | 380.0 | 240.1 | 139.9 | 4882.9 |
| 34 | 18 | 30 | 3 | 0 | 0 | 0 | 48 | 15 | 0.0  | 432.0 | 230.4 | 201.6 | 5084.5 |
| 39 | 18 | 1  | 3 | 0 | 0 | 0 | 4  | 40 | 0.0  | 36.0  | 1.6   | 34.4  | 34.4   |
| 39 | 18 | 2  | 3 | 0 | 0 | 0 | 1  | 45 | 0.0  | 9.0   | 0.1   | 8.9   | 43.3   |
| 39 | 18 | 3  | 3 | 1 | 0 | 0 | 4  | 30 | 0.0  | 36.0  | 1.6   | 34.4  | 77.7   |
| 39 | 18 | 4  | 3 | 0 | 0 | 0 | 30 | 30 | 0.0  | 270.0 | 90.0  | 180.0 | 257.7  |
| 39 | 18 | 5  | 3 | 0 | 1 | 0 | 22 | 41 | 0.0  | 198.0 | 48.4  | 149.6 | 407.3  |
| 39 | 18 | 6  | 3 | 0 | 0 | 0 | 10 | 35 | 0.0  | 90.0  | 10.0  | 80.0  | 487.3  |
| 39 | 18 | 7  | 3 | 1 | 1 | 1 | 11 | 47 | 29.0 | 290.0 | 12.1  | 277.9 | 765.2  |
| 39 | 18 | 8  | 3 | 0 | 0 | 0 | 15 | 40 | 0.0  | 135.0 | 22.5  | 112.5 | 877.7  |
| 39 | 18 | 9  | 3 | 1 | 0 | 0 | 34 | 48 | 0.0  | 306.0 | 115.6 | 190.4 | 1068.1 |
| 39 | 18 | 10 | 3 | 0 | 0 | 0 | 33 | 28 | 0.0  | 297.0 | 108.9 | 188.1 | 1256.2 |



|    |    |    |   |   |   |   |    |    |      |       |       |       |        |
|----|----|----|---|---|---|---|----|----|------|-------|-------|-------|--------|
| 39 | 18 | 11 | 3 | 1 | 0 | 0 | 2  | 29 | 0.0  | 18.0  | 0.4   | 17.6  | 1273.8 |
| 39 | 18 | 12 | 3 | 0 | 1 | 0 | 55 | 32 | 0.0  | 495.0 | 302.5 | 192.5 | 1466.3 |
| 39 | 18 | 13 | 3 | 0 | 1 | 0 | 25 | 15 | 0.0  | 225.0 | 62.5  | 162.5 | 1628.8 |
| 39 | 18 | 14 | 3 | 0 | 1 | 0 | 6  | 40 | 0.0  | 54.0  | 3.6   | 50.4  | 1679.2 |
| 39 | 18 | 15 | 3 | 1 | 0 | 0 | 60 | 42 | 0.0  | 540.0 | 360.0 | 180.0 | 1859.2 |
| 39 | 18 | 16 | 3 | 0 | 0 | 0 | 60 | 55 | 0.0  | 540.0 | 360.0 | 180.0 | 2039.2 |
| 39 | 18 | 17 | 3 | 0 | 0 | 0 | 70 | 65 | 0.0  | 630.0 | 490.0 | 140.0 | 2179.2 |
| 39 | 18 | 18 | 3 | 1 | 0 | 0 | 13 | 70 | 0.0  | 117.0 | 16.9  | 100.1 | 2279.3 |
| 39 | 18 | 19 | 3 | 1 | 1 | 1 | 85 | 55 | 70.0 | 700.0 | 722.5 | -22.5 | 2256.8 |
| 39 | 18 | 20 | 3 | 0 | 1 | 0 | 12 | 74 | 0.0  | 108.0 | 14.4  | 93.6  | 2350.4 |
| 39 | 18 | 21 | 3 | 0 | 0 | 0 | 15 | 80 | 0.0  | 135.0 | 22.5  | 112.5 | 2462.9 |
| 39 | 18 | 22 | 3 | 1 | 0 | 0 | 3  | 90 | 0.0  | 27.0  | 0.9   | 26.1  | 2489.0 |
| 39 | 18 | 23 | 3 | 0 | 1 | 0 | 25 | 90 | 0.0  | 225.0 | 62.5  | 162.5 | 2651.5 |
| 39 | 18 | 24 | 3 | 0 | 0 | 0 | 22 | 42 | 0.0  | 198.0 | 48.4  | 149.6 | 2801.1 |
| 39 | 18 | 25 | 3 | 0 | 1 | 0 | 5  | 55 | 0.0  | 45.0  | 2.5   | 42.5  | 2843.6 |
| 39 | 18 | 26 | 3 | 1 | 1 | 1 | 65 | 67 | 66.0 | 660.0 | 422.5 | 237.5 | 3081.1 |
| 39 | 18 | 27 | 3 | 0 | 0 | 0 | 7  | 50 | 0.0  | 63.0  | 4.9   | 58.1  | 3139.2 |
| 39 | 18 | 28 | 3 | 0 | 0 | 0 | 32 | 63 | 0.0  | 288.0 | 102.4 | 185.6 | 3324.8 |
| 39 | 18 | 29 | 3 | 1 | 1 | 1 | 27 | 49 | 38.0 | 380.0 | 72.9  | 307.1 | 3631.9 |
| 39 | 18 | 30 | 3 | 0 | 0 | 0 | 15 | 48 | 0.0  | 135.0 | 22.5  | 112.5 | 3744.4 |
| 35 | 19 | 1  | 3 | 0 | 1 | 0 | 45 | 45 | 0.0  | 405.0 | 202.5 | 202.5 | 202.5  |
| 35 | 19 | 2  | 3 | 0 | 1 | 0 | 45 | 45 | 0.0  | 405.0 | 202.5 | 202.5 | 405.0  |
| 35 | 19 | 3  | 3 | 0 | 1 | 0 | 45 | 45 | 0.0  | 405.0 | 202.5 | 202.5 | 607.5  |
| 35 | 19 | 4  | 3 | 0 | 1 | 0 | 45 | 45 | 0.0  | 405.0 | 202.5 | 202.5 | 810.0  |
| 35 | 19 | 5  | 3 | 0 | 1 | 0 | 45 | 45 | 0.0  | 405.0 | 202.5 | 202.5 | 1012.5 |
| 35 | 19 | 6  | 3 | 0 | 1 | 0 | 45 | 45 | 0.0  | 405.0 | 202.5 | 202.5 | 1215.0 |
| 35 | 19 | 7  | 3 | 0 | 1 | 0 | 45 | 45 | 0.0  | 405.0 | 202.5 | 202.5 | 1417.5 |
| 35 | 19 | 8  | 3 | 0 | 1 | 0 | 45 | 45 | 0.0  | 405.0 | 202.5 | 202.5 | 1620.0 |
| 35 | 19 | 9  | 3 | 0 | 1 | 0 | 45 | 45 | 0.0  | 405.0 | 202.5 | 202.5 | 1822.5 |
| 35 | 19 | 10 | 3 | 0 | 1 | 0 | 45 | 45 | 0.0  | 405.0 | 202.5 | 202.5 | 2025.0 |
| 35 | 19 | 11 | 3 | 0 | 1 | 0 | 45 | 45 | 0.0  | 405.0 | 202.5 | 202.5 | 2227.5 |
| 35 | 19 | 12 | 3 | 0 | 1 | 0 | 45 | 45 | 0.0  | 405.0 | 202.5 | 202.5 | 2430.0 |
| 35 | 19 | 13 | 3 | 0 | 1 | 0 | 45 | 45 | 0.0  | 405.0 | 202.5 | 202.5 | 2632.5 |
| 35 | 19 | 14 | 3 | 0 | 1 | 0 | 45 | 45 | 0.0  | 405.0 | 202.5 | 202.5 | 2835.0 |
| 35 | 19 | 15 | 3 | 0 | 1 | 0 | 45 | 45 | 0.0  | 405.0 | 202.5 | 202.5 | 3037.5 |
| 35 | 19 | 16 | 3 | 0 | 1 | 0 | 45 | 45 | 0.0  | 405.0 | 202.5 | 202.5 | 3240.0 |
| 35 | 19 | 17 | 3 | 0 | 1 | 0 | 45 | 45 | 0.0  | 405.0 | 202.5 | 202.5 | 3442.5 |
| 35 | 19 | 18 | 3 | 0 | 1 | 0 | 45 | 45 | 0.0  | 405.0 | 202.5 | 202.5 | 3645.0 |

|    |    |    |   |   |   |   |    |    |     |       |       |       |        |
|----|----|----|---|---|---|---|----|----|-----|-------|-------|-------|--------|
| 35 | 19 | 19 | 3 | 0 | 1 | 0 | 45 | 45 | 0.0 | 405.0 | 202.5 | 202.5 | 3847.5 |
| 35 | 19 | 20 | 3 | 0 | 1 | 0 | 45 | 45 | 0.0 | 405.0 | 202.5 | 202.5 | 4050.0 |
| 35 | 19 | 21 | 3 | 0 | 1 | 0 | 45 | 45 | 0.0 | 405.0 | 202.5 | 202.5 | 4252.5 |
| 35 | 19 | 22 | 3 | 0 | 1 | 0 | 45 | 45 | 0.0 | 405.0 | 202.5 | 202.5 | 4455.0 |
| 35 | 19 | 23 | 3 | 0 | 1 | 0 | 45 | 45 | 0.0 | 405.0 | 202.5 | 202.5 | 4657.5 |
| 35 | 19 | 24 | 3 | 0 | 1 | 0 | 45 | 45 | 0.0 | 405.0 | 202.5 | 202.5 | 4860.0 |
| 35 | 19 | 25 | 3 | 0 | 1 | 0 | 45 | 45 | 0.0 | 405.0 | 202.5 | 202.5 | 5062.5 |
| 35 | 19 | 26 | 3 | 0 | 1 | 0 | 45 | 45 | 0.0 | 405.0 | 202.5 | 202.5 | 5265.0 |
| 35 | 19 | 27 | 3 | 0 | 1 | 0 | 45 | 45 | 0.0 | 405.0 | 202.5 | 202.5 | 5467.5 |
| 35 | 19 | 28 | 3 | 0 | 1 | 0 | 45 | 45 | 0.0 | 405.0 | 202.5 | 202.5 | 5670.0 |
| 35 | 19 | 29 | 3 | 0 | 1 | 0 | 45 | 45 | 0.0 | 405.0 | 202.5 | 202.5 | 5872.5 |
| 35 | 19 | 30 | 3 | 0 | 1 | 0 | 45 | 45 | 0.0 | 405.0 | 202.5 | 202.5 | 6075.0 |
| 38 | 19 | 1  | 3 | 1 | 0 | 0 | 45 | 45 | 0.0 | 405.0 | 202.5 | 202.5 | 202.5  |
| 38 | 19 | 2  | 3 | 1 | 0 | 0 | 45 | 45 | 0.0 | 405.0 | 202.5 | 202.5 | 405.0  |
| 38 | 19 | 3  | 3 | 1 | 0 | 0 | 45 | 45 | 0.0 | 405.0 | 202.5 | 202.5 | 607.5  |
| 38 | 19 | 4  | 3 | 1 | 0 | 0 | 45 | 45 | 0.0 | 405.0 | 202.5 | 202.5 | 810.0  |
| 38 | 19 | 5  | 3 | 1 | 0 | 0 | 45 | 45 | 0.0 | 405.0 | 202.5 | 202.5 | 1012.5 |
| 38 | 19 | 6  | 3 | 1 | 0 | 0 | 45 | 45 | 0.0 | 405.0 | 202.5 | 202.5 | 1215.0 |
| 38 | 19 | 7  | 3 | 1 | 0 | 0 | 45 | 45 | 0.0 | 405.0 | 202.5 | 202.5 | 1417.5 |
| 38 | 19 | 8  | 3 | 1 | 0 | 0 | 45 | 45 | 0.0 | 405.0 | 202.5 | 202.5 | 1620.0 |
| 38 | 19 | 9  | 3 | 1 | 0 | 0 | 45 | 45 | 0.0 | 405.0 | 202.5 | 202.5 | 1822.5 |
| 38 | 19 | 10 | 3 | 1 | 0 | 0 | 45 | 45 | 0.0 | 405.0 | 202.5 | 202.5 | 2025.0 |
| 38 | 19 | 11 | 3 | 1 | 0 | 0 | 45 | 45 | 0.0 | 405.0 | 202.5 | 202.5 | 2227.5 |
| 38 | 19 | 12 | 3 | 1 | 0 | 0 | 45 | 45 | 0.0 | 405.0 | 202.5 | 202.5 | 2430.0 |
| 38 | 19 | 13 | 3 | 1 | 0 | 0 | 45 | 45 | 0.0 | 405.0 | 202.5 | 202.5 | 2632.5 |
| 38 | 19 | 14 | 3 | 1 | 0 | 0 | 45 | 45 | 0.0 | 405.0 | 202.5 | 202.5 | 2835.0 |
| 38 | 19 | 15 | 3 | 1 | 0 | 0 | 45 | 45 | 0.0 | 405.0 | 202.5 | 202.5 | 3037.5 |
| 38 | 19 | 16 | 3 | 1 | 0 | 0 | 45 | 45 | 0.0 | 405.0 | 202.5 | 202.5 | 3240.0 |
| 38 | 19 | 17 | 3 | 1 | 0 | 0 | 45 | 45 | 0.0 | 405.0 | 202.5 | 202.5 | 3442.5 |
| 38 | 19 | 18 | 3 | 1 | 0 | 0 | 45 | 45 | 0.0 | 405.0 | 202.5 | 202.5 | 3645.0 |
| 38 | 19 | 19 | 3 | 1 | 0 | 0 | 45 | 45 | 0.0 | 405.0 | 202.5 | 202.5 | 3847.5 |
| 38 | 19 | 20 | 3 | 1 | 0 | 0 | 45 | 45 | 0.0 | 405.0 | 202.5 | 202.5 | 4050.0 |
| 38 | 19 | 21 | 3 | 1 | 0 | 0 | 45 | 45 | 0.0 | 405.0 | 202.5 | 202.5 | 4252.5 |
| 38 | 19 | 22 | 3 | 1 | 0 | 0 | 45 | 45 | 0.0 | 405.0 | 202.5 | 202.5 | 4455.0 |
| 38 | 19 | 23 | 3 | 1 | 0 | 0 | 45 | 45 | 0.0 | 405.0 | 202.5 | 202.5 | 4657.5 |
| 38 | 19 | 24 | 3 | 1 | 0 | 0 | 45 | 45 | 0.0 | 405.0 | 202.5 | 202.5 | 4860.0 |
| 38 | 19 | 25 | 3 | 1 | 0 | 0 | 45 | 45 | 0.0 | 405.0 | 202.5 | 202.5 | 5062.5 |
| 38 | 19 | 26 | 3 | 1 | 0 | 0 | 45 | 45 | 0.0 | 405.0 | 202.5 | 202.5 | 5265.0 |

|    |    |    |   |   |   |   |    |    |      |       |       |       |        |
|----|----|----|---|---|---|---|----|----|------|-------|-------|-------|--------|
| 38 | 19 | 27 | 3 | 1 | 0 | 0 | 45 | 45 | 0.0  | 405.0 | 202.5 | 202.5 | 5467.5 |
| 38 | 19 | 28 | 3 | 1 | 0 | 0 | 45 | 45 | 0.0  | 405.0 | 202.5 | 202.5 | 5670.0 |
| 38 | 19 | 29 | 3 | 1 | 0 | 0 | 45 | 45 | 0.0  | 405.0 | 202.5 | 202.5 | 5872.5 |
| 38 | 19 | 30 | 3 | 1 | 0 | 0 | 45 | 45 | 0.0  | 405.0 | 202.5 | 202.5 | 6075.0 |
| 36 | 20 | 1  | 3 | 1 | 1 | 1 | 30 | 50 | 40.0 | 400.0 | 90.0  | 310.0 | 310.0  |
| 36 | 20 | 2  | 3 | 1 | 1 | 1 | 1  | 50 | 25.5 | 255.0 | 0.1   | 254.9 | 564.9  |
| 36 | 20 | 3  | 3 | 1 | 0 | 0 | 45 | 50 | 0.0  | 405.0 | 202.5 | 202.5 | 767.4  |
| 36 | 20 | 4  | 3 | 1 | 0 | 0 | 45 | 50 | 0.0  | 405.0 | 202.5 | 202.5 | 969.9  |
| 36 | 20 | 5  | 3 | 1 | 0 | 0 | 45 | 50 | 0.0  | 405.0 | 202.5 | 202.5 | 1172.4 |
| 36 | 20 | 6  | 3 | 1 | 0 | 0 | 45 | 50 | 0.0  | 405.0 | 202.5 | 202.5 | 1374.9 |
| 36 | 20 | 7  | 3 | 1 | 1 | 1 | 50 | 80 | 65.0 | 650.0 | 250.0 | 400.0 | 1774.9 |
| 36 | 20 | 8  | 3 | 1 | 1 | 1 | 80 | 70 | 75.0 | 750.0 | 640.0 | 110.0 | 1884.9 |
| 36 | 20 | 9  | 3 | 1 | 1 | 1 | 50 | 60 | 55.0 | 550.0 | 250.0 | 300.0 | 2184.9 |
| 36 | 20 | 10 | 3 | 1 | 1 | 1 | 60 | 70 | 65.0 | 650.0 | 360.0 | 290.0 | 2474.9 |
| 36 | 20 | 11 | 3 | 1 | 1 | 1 | 60 | 65 | 62.5 | 625.0 | 360.0 | 265.0 | 2739.9 |
| 36 | 20 | 12 | 3 | 1 | 1 | 1 | 70 | 60 | 65.0 | 650.0 | 490.0 | 160.0 | 2899.9 |
| 36 | 20 | 13 | 3 | 1 | 1 | 1 | 60 | 57 | 58.5 | 585.0 | 360.0 | 225.0 | 3124.9 |
| 36 | 20 | 14 | 3 | 1 | 1 | 1 | 50 | 60 | 55.0 | 550.0 | 250.0 | 300.0 | 3424.9 |
| 36 | 20 | 15 | 3 | 1 | 1 | 1 | 60 | 70 | 65.0 | 650.0 | 360.0 | 290.0 | 3714.9 |
| 36 | 20 | 16 | 3 | 1 | 1 | 1 | 60 | 65 | 62.5 | 625.0 | 360.0 | 265.0 | 3979.9 |
| 36 | 20 | 17 | 3 | 1 | 1 | 1 | 70 | 65 | 67.5 | 675.0 | 490.0 | 185.0 | 4164.9 |
| 36 | 20 | 18 | 3 | 1 | 1 | 1 | 60 | 65 | 62.5 | 625.0 | 360.0 | 265.0 | 4429.9 |
| 36 | 20 | 19 | 3 | 1 | 1 | 1 | 65 | 67 | 66.0 | 660.0 | 422.5 | 237.5 | 4667.4 |
| 36 | 20 | 20 | 3 | 1 | 1 | 1 | 60 | 65 | 62.5 | 625.0 | 360.0 | 265.0 | 4932.4 |
| 36 | 20 | 21 | 3 | 1 | 1 | 1 | 65 | 68 | 66.5 | 665.0 | 422.5 | 242.5 | 5174.9 |
| 36 | 20 | 22 | 3 | 1 | 1 | 1 | 75 | 70 | 72.5 | 725.0 | 562.5 | 162.5 | 5337.4 |
| 36 | 20 | 23 | 3 | 1 | 1 | 1 | 75 | 73 | 74.0 | 740.0 | 562.5 | 177.5 | 5514.9 |
| 36 | 20 | 24 | 3 | 1 | 1 | 1 | 75 | 71 | 73.0 | 730.0 | 562.5 | 167.5 | 5682.4 |
| 36 | 20 | 25 | 3 | 1 | 1 | 1 | 60 | 71 | 65.5 | 655.0 | 360.0 | 295.0 | 5977.4 |
| 36 | 20 | 26 | 3 | 1 | 1 | 1 | 60 | 78 | 69.0 | 690.0 | 360.0 | 330.0 | 6307.4 |
| 36 | 20 | 27 | 3 | 1 | 0 | 0 | 45 | 50 | 0.0  | 405.0 | 202.5 | 202.5 | 6509.9 |
| 36 | 20 | 28 | 3 | 1 | 0 | 0 | 45 | 50 | 0.0  | 405.0 | 202.5 | 202.5 | 6712.4 |
| 36 | 20 | 29 | 3 | 1 | 0 | 0 | 45 | 50 | 0.0  | 405.0 | 202.5 | 202.5 | 6914.9 |
| 36 | 20 | 30 | 3 | 1 | 1 | 1 | 50 | 65 | 57.5 | 575.0 | 250.0 | 325.0 | 7239.9 |
| 37 | 20 | 1  | 3 | 1 | 1 | 1 | 50 | 30 | 40.0 | 400.0 | 250.0 | 150.0 | 150.0  |
| 37 | 20 | 2  | 3 | 1 | 1 | 1 | 50 | 1  | 25.5 | 255.0 | 250.0 | 5.0   | 155.0  |
| 37 | 20 | 3  | 3 | 0 | 1 | 0 | 50 | 45 | 0.0  | 450.0 | 250.0 | 200.0 | 355.0  |
| 37 | 20 | 4  | 3 | 0 | 1 | 0 | 50 | 45 | 0.0  | 450.0 | 250.0 | 200.0 | 555.0  |

|    |    |    |   |   |   |   |    |     |      |       |       |       |        |
|----|----|----|---|---|---|---|----|-----|------|-------|-------|-------|--------|
| 37 | 20 | 5  | 3 | 0 | 1 | 0 | 50 | 45  | 0.0  | 450.0 | 250.0 | 200.0 | 755.0  |
| 37 | 20 | 6  | 3 | 0 | 1 | 0 | 50 | 45  | 0.0  | 450.0 | 250.0 | 200.0 | 955.0  |
| 37 | 20 | 7  | 3 | 1 | 1 | 1 | 80 | 50  | 65.0 | 650.0 | 640.0 | 10.0  | 965.0  |
| 37 | 20 | 8  | 3 | 1 | 1 | 1 | 70 | 80  | 75.0 | 750.0 | 490.0 | 260.0 | 1225.0 |
| 37 | 20 | 9  | 3 | 1 | 1 | 1 | 60 | 50  | 55.0 | 550.0 | 360.0 | 190.0 | 1415.0 |
| 37 | 20 | 10 | 3 | 1 | 1 | 1 | 70 | 60  | 65.0 | 650.0 | 490.0 | 160.0 | 1575.0 |
| 37 | 20 | 11 | 3 | 1 | 1 | 1 | 65 | 60  | 62.5 | 625.0 | 422.5 | 202.5 | 1777.5 |
| 37 | 20 | 12 | 3 | 1 | 1 | 1 | 60 | 70  | 65.0 | 650.0 | 360.0 | 290.0 | 2067.5 |
| 37 | 20 | 13 | 3 | 1 | 1 | 1 | 57 | 60  | 58.5 | 585.0 | 324.9 | 260.1 | 2327.6 |
| 37 | 20 | 14 | 3 | 1 | 1 | 1 | 60 | 50  | 55.0 | 550.0 | 360.0 | 190.0 | 2517.6 |
| 37 | 20 | 15 | 3 | 1 | 1 | 1 | 70 | 60  | 65.0 | 650.0 | 490.0 | 160.0 | 2677.6 |
| 37 | 20 | 16 | 3 | 1 | 1 | 1 | 65 | 60  | 62.5 | 625.0 | 422.5 | 202.5 | 2880.1 |
| 37 | 20 | 17 | 3 | 1 | 1 | 1 | 65 | 70  | 67.5 | 675.0 | 422.5 | 252.5 | 3132.6 |
| 37 | 20 | 18 | 3 | 1 | 1 | 1 | 65 | 60  | 62.5 | 625.0 | 422.5 | 202.5 | 3335.1 |
| 37 | 20 | 19 | 3 | 1 | 1 | 1 | 67 | 65  | 66.0 | 660.0 | 448.9 | 211.1 | 3546.2 |
| 37 | 20 | 20 | 3 | 1 | 1 | 1 | 65 | 60  | 62.5 | 625.0 | 422.5 | 202.5 | 3748.7 |
| 37 | 20 | 21 | 3 | 1 | 1 | 1 | 68 | 65  | 66.5 | 665.0 | 462.4 | 202.6 | 3951.3 |
| 37 | 20 | 22 | 3 | 1 | 1 | 1 | 70 | 75  | 72.5 | 725.0 | 490.0 | 235.0 | 4186.3 |
| 37 | 20 | 23 | 3 | 1 | 1 | 1 | 73 | 75  | 74.0 | 740.0 | 532.9 | 207.1 | 4393.4 |
| 37 | 20 | 24 | 3 | 1 | 1 | 1 | 71 | 75  | 73.0 | 730.0 | 504.1 | 225.9 | 4619.3 |
| 37 | 20 | 25 | 3 | 1 | 1 | 1 | 71 | 60  | 65.5 | 655.0 | 504.1 | 150.9 | 4770.2 |
| 37 | 20 | 26 | 3 | 1 | 1 | 1 | 78 | 60  | 69.0 | 690.0 | 608.4 | 81.6  | 4851.8 |
| 37 | 20 | 27 | 3 | 0 | 1 | 0 | 50 | 45  | 0.0  | 450.0 | 250.0 | 200.0 | 5051.8 |
| 37 | 20 | 28 | 3 | 0 | 1 | 0 | 50 | 45  | 0.0  | 450.0 | 250.0 | 200.0 | 5251.8 |
| 37 | 20 | 29 | 3 | 0 | 1 | 0 | 50 | 45  | 0.0  | 450.0 | 250.0 | 200.0 | 5451.8 |
| 37 | 20 | 30 | 3 | 1 | 1 | 1 | 65 | 50  | 57.5 | 575.0 | 422.5 | 152.5 | 5604.3 |
| 41 | 21 | 1  | 3 | 1 | 1 | 1 | 50 | 75  | 62.5 | 625.0 | 250.0 | 375.0 | 375.0  |
| 41 | 21 | 2  | 3 | 1 | 0 | 0 | 50 | 90  | 0.0  | 450.0 | 250.0 | 200.0 | 575.0  |
| 41 | 21 | 3  | 3 | 1 | 1 | 1 | 50 | 90  | 70.0 | 700.0 | 250.0 | 450.0 | 1025.0 |
| 41 | 21 | 4  | 3 | 1 | 1 | 1 | 50 | 50  | 50.0 | 500.0 | 250.0 | 250.0 | 1275.0 |
| 41 | 21 | 5  | 3 | 1 | 1 | 1 | 50 | 85  | 67.5 | 675.0 | 250.0 | 425.0 | 1700.0 |
| 41 | 21 | 6  | 3 | 1 | 0 | 0 | 45 | 100 | 0.0  | 405.0 | 202.5 | 202.5 | 1902.5 |
| 41 | 21 | 7  | 3 | 1 | 1 | 1 | 50 | 50  | 50.0 | 500.0 | 250.0 | 250.0 | 2152.5 |
| 41 | 21 | 8  | 3 | 1 | 1 | 1 | 50 | 50  | 50.0 | 500.0 | 250.0 | 250.0 | 2402.5 |
| 41 | 21 | 9  | 3 | 1 | 1 | 1 | 50 | 60  | 55.0 | 550.0 | 250.0 | 300.0 | 2702.5 |
| 41 | 21 | 10 | 3 | 1 | 1 | 1 | 50 | 75  | 62.5 | 625.0 | 250.0 | 375.0 | 3077.5 |
| 41 | 21 | 11 | 3 | 1 | 1 | 1 | 50 | 50  | 50.0 | 500.0 | 250.0 | 250.0 | 3327.5 |
| 41 | 21 | 12 | 3 | 1 | 1 | 1 | 50 | 50  | 50.0 | 500.0 | 250.0 | 250.0 | 3577.5 |

|    |    |    |   |   |   |   |     |    |      |       |        |        |        |
|----|----|----|---|---|---|---|-----|----|------|-------|--------|--------|--------|
| 41 | 21 | 13 | 3 | 1 | 1 | 1 | 50  | 50 | 50.0 | 500.0 | 250.0  | 250.0  | 3827.5 |
| 41 | 21 | 14 | 3 | 1 | 1 | 1 | 50  | 50 | 50.0 | 500.0 | 250.0  | 250.0  | 4077.5 |
| 41 | 21 | 15 | 3 | 1 | 1 | 1 | 50  | 50 | 50.0 | 500.0 | 250.0  | 250.0  | 4327.5 |
| 41 | 21 | 16 | 3 | 1 | 1 | 1 | 50  | 50 | 50.0 | 500.0 | 250.0  | 250.0  | 4577.5 |
| 41 | 21 | 17 | 3 | 1 | 1 | 1 | 50  | 50 | 50.0 | 500.0 | 250.0  | 250.0  | 4827.5 |
| 41 | 21 | 18 | 3 | 1 | 0 | 0 | 45  | 28 | 0.0  | 405.0 | 202.5  | 202.5  | 5030.0 |
| 41 | 21 | 19 | 3 | 1 | 1 | 1 | 50  | 50 | 50.0 | 500.0 | 250.0  | 250.0  | 5280.0 |
| 41 | 21 | 20 | 3 | 1 | 1 | 1 | 50  | 50 | 50.0 | 500.0 | 250.0  | 250.0  | 5530.0 |
| 41 | 21 | 21 | 3 | 1 | 1 | 1 | 50  | 50 | 50.0 | 500.0 | 250.0  | 250.0  | 5780.0 |
| 41 | 21 | 22 | 3 | 1 | 1 | 1 | 50  | 50 | 50.0 | 500.0 | 250.0  | 250.0  | 6030.0 |
| 41 | 21 | 23 | 3 | 1 | 1 | 1 | 50  | 50 | 50.0 | 500.0 | 250.0  | 250.0  | 6280.0 |
| 41 | 21 | 24 | 3 | 1 | 1 | 1 | 50  | 50 | 50.0 | 500.0 | 250.0  | 250.0  | 6530.0 |
| 41 | 21 | 25 | 3 | 1 | 1 | 1 | 50  | 50 | 50.0 | 500.0 | 250.0  | 250.0  | 6780.0 |
| 41 | 21 | 26 | 3 | 1 | 0 | 0 | 45  | 50 | 0.0  | 405.0 | 202.5  | 202.5  | 6982.5 |
| 41 | 21 | 27 | 3 | 1 | 1 | 1 | 50  | 50 | 50.0 | 500.0 | 250.0  | 250.0  | 7232.5 |
| 41 | 21 | 28 | 3 | 1 | 0 | 0 | 45  | 50 | 0.0  | 405.0 | 202.5  | 202.5  | 7435.0 |
| 41 | 21 | 29 | 3 | 1 | 0 | 0 | 45  | 50 | 0.0  | 405.0 | 202.5  | 202.5  | 7637.5 |
| 41 | 21 | 30 | 3 | 1 | 1 | 1 | 1   | 50 | 25.5 | 255.0 | 0.1    | 254.9  | 7892.4 |
| 48 | 21 | 1  | 3 | 1 | 1 | 1 | 75  | 50 | 62.5 | 625.0 | 562.5  | 62.5   | 62.5   |
| 48 | 21 | 2  | 3 | 0 | 1 | 0 | 90  | 50 | 0.0  | 810.0 | 810.0  | 0.0    | 62.5   |
| 48 | 21 | 3  | 3 | 1 | 1 | 1 | 90  | 50 | 70.0 | 700.0 | 810.0  | -110.0 | -47.5  |
| 48 | 21 | 4  | 3 | 1 | 1 | 1 | 50  | 50 | 50.0 | 500.0 | 250.0  | 250.0  | 202.5  |
| 48 | 21 | 5  | 3 | 1 | 1 | 1 | 85  | 50 | 67.5 | 675.0 | 722.5  | -47.5  | 155.0  |
| 48 | 21 | 6  | 3 | 0 | 1 | 0 | 100 | 45 | 0.0  | 900.0 | 1000.0 | -100.0 | 55.0   |
| 48 | 21 | 7  | 3 | 1 | 1 | 1 | 50  | 50 | 50.0 | 500.0 | 250.0  | 250.0  | 305.0  |
| 48 | 21 | 8  | 3 | 1 | 1 | 1 | 50  | 50 | 50.0 | 500.0 | 250.0  | 250.0  | 555.0  |
| 48 | 21 | 9  | 3 | 1 | 1 | 1 | 60  | 50 | 55.0 | 550.0 | 360.0  | 190.0  | 745.0  |
| 48 | 21 | 10 | 3 | 1 | 1 | 1 | 75  | 50 | 62.5 | 625.0 | 562.5  | 62.5   | 807.5  |
| 48 | 21 | 11 | 3 | 1 | 1 | 1 | 50  | 50 | 50.0 | 500.0 | 250.0  | 250.0  | 1057.5 |
| 48 | 21 | 12 | 3 | 1 | 1 | 1 | 50  | 50 | 50.0 | 500.0 | 250.0  | 250.0  | 1307.5 |
| 48 | 21 | 13 | 3 | 1 | 1 | 1 | 50  | 50 | 50.0 | 500.0 | 250.0  | 250.0  | 1557.5 |
| 48 | 21 | 14 | 3 | 1 | 1 | 1 | 50  | 50 | 50.0 | 500.0 | 250.0  | 250.0  | 1807.5 |
| 48 | 21 | 15 | 3 | 1 | 1 | 1 | 50  | 50 | 50.0 | 500.0 | 250.0  | 250.0  | 2057.5 |
| 48 | 21 | 16 | 3 | 1 | 1 | 1 | 50  | 50 | 50.0 | 500.0 | 250.0  | 250.0  | 2307.5 |
| 48 | 21 | 17 | 3 | 1 | 1 | 1 | 50  | 50 | 50.0 | 500.0 | 250.0  | 250.0  | 2557.5 |
| 48 | 21 | 18 | 3 | 0 | 1 | 0 | 28  | 45 | 0.0  | 252.0 | 78.4   | 173.6  | 2731.1 |
| 48 | 21 | 19 | 3 | 1 | 1 | 1 | 50  | 50 | 50.0 | 500.0 | 250.0  | 250.0  | 2981.1 |
| 48 | 21 | 20 | 3 | 1 | 1 | 1 | 50  | 50 | 50.0 | 500.0 | 250.0  | 250.0  | 3231.1 |

|    |    |    |   |   |   |   |     |    |      |       |        |        |        |
|----|----|----|---|---|---|---|-----|----|------|-------|--------|--------|--------|
| 48 | 21 | 21 | 3 | 1 | 1 | 1 | 50  | 50 | 50.0 | 500.0 | 250.0  | 250.0  | 3481.1 |
| 48 | 21 | 22 | 3 | 1 | 1 | 1 | 50  | 50 | 50.0 | 500.0 | 250.0  | 250.0  | 3731.1 |
| 48 | 21 | 23 | 3 | 1 | 1 | 1 | 50  | 50 | 50.0 | 500.0 | 250.0  | 250.0  | 3981.1 |
| 48 | 21 | 24 | 3 | 1 | 1 | 1 | 50  | 50 | 50.0 | 500.0 | 250.0  | 250.0  | 4231.1 |
| 48 | 21 | 25 | 3 | 1 | 1 | 1 | 50  | 50 | 50.0 | 500.0 | 250.0  | 250.0  | 4481.1 |
| 48 | 21 | 26 | 3 | 0 | 1 | 0 | 50  | 45 | 0.0  | 450.0 | 250.0  | 200.0  | 4681.1 |
| 48 | 21 | 27 | 3 | 1 | 1 | 1 | 50  | 50 | 50.0 | 500.0 | 250.0  | 250.0  | 4931.1 |
| 48 | 21 | 28 | 3 | 0 | 1 | 0 | 50  | 45 | 0.0  | 450.0 | 250.0  | 200.0  | 5131.1 |
| 48 | 21 | 29 | 3 | 0 | 1 | 0 | 50  | 45 | 0.0  | 450.0 | 250.0  | 200.0  | 5331.1 |
| 48 | 21 | 30 | 3 | 1 | 1 | 1 | 50  | 1  | 25.5 | 255.0 | 250.0  | 5.0    | 5336.1 |
| 42 | 22 | 1  | 3 | 1 | 1 | 1 | 20  | 45 | 32.5 | 325.0 | 40.0   | 285.0  | 285.0  |
| 42 | 22 | 2  | 3 | 1 | 0 | 0 | 50  | 42 | 0.0  | 450.0 | 250.0  | 200.0  | 485.0  |
| 42 | 22 | 3  | 3 | 1 | 0 | 0 | 50  | 39 | 0.0  | 450.0 | 250.0  | 200.0  | 685.0  |
| 42 | 22 | 4  | 3 | 1 | 0 | 0 | 70  | 36 | 0.0  | 630.0 | 490.0  | 140.0  | 825.0  |
| 42 | 22 | 5  | 3 | 1 | 0 | 0 | 80  | 33 | 0.0  | 720.0 | 640.0  | 80.0   | 905.0  |
| 42 | 22 | 6  | 3 | 1 | 0 | 0 | 20  | 45 | 0.0  | 180.0 | 40.0   | 140.0  | 1045.0 |
| 42 | 22 | 7  | 3 | 0 | 1 | 0 | 90  | 99 | 0.0  | 810.0 | 810.0  | 0.0    | 1045.0 |
| 42 | 22 | 8  | 3 | 1 | 1 | 1 | 20  | 99 | 59.5 | 595.0 | 40.0   | 555.0  | 1600.0 |
| 42 | 22 | 9  | 3 | 1 | 0 | 0 | 20  | 45 | 0.0  | 180.0 | 40.0   | 140.0  | 1740.0 |
| 42 | 22 | 10 | 3 | 1 | 0 | 0 | 100 | 99 | 0.0  | 900.0 | 1000.0 | -100.0 | 1640.0 |
| 42 | 22 | 11 | 3 | 1 | 0 | 0 | 20  | 45 | 0.0  | 180.0 | 40.0   | 140.0  | 1780.0 |
| 42 | 22 | 12 | 3 | 1 | 1 | 1 | 20  | 90 | 55.0 | 550.0 | 40.0   | 510.0  | 2290.0 |
| 42 | 22 | 13 | 3 | 1 | 0 | 0 | 20  | 45 | 0.0  | 180.0 | 40.0   | 140.0  | 2430.0 |
| 42 | 22 | 14 | 3 | 0 | 0 | 0 | 45  | 45 | 0.0  | 405.0 | 202.5  | 202.5  | 2632.5 |
| 42 | 22 | 15 | 3 | 1 | 0 | 0 | 20  | 45 | 0.0  | 180.0 | 40.0   | 140.0  | 2772.5 |
| 42 | 22 | 16 | 3 | 0 | 0 | 0 | 50  | 45 | 0.0  | 450.0 | 250.0  | 200.0  | 2972.5 |
| 42 | 22 | 17 | 3 | 1 | 0 | 0 | 50  | 45 | 0.0  | 450.0 | 250.0  | 200.0  | 3172.5 |
| 42 | 22 | 18 | 3 | 1 | 0 | 0 | 50  | 45 | 0.0  | 450.0 | 250.0  | 200.0  | 3372.5 |
| 42 | 22 | 19 | 3 | 0 | 0 | 0 | 50  | 45 | 0.0  | 450.0 | 250.0  | 200.0  | 3572.5 |
| 42 | 22 | 20 | 3 | 1 | 0 | 0 | 50  | 45 | 0.0  | 450.0 | 250.0  | 200.0  | 3772.5 |
| 42 | 22 | 21 | 3 | 0 | 0 | 0 | 50  | 45 | 0.0  | 450.0 | 250.0  | 200.0  | 3972.5 |
| 42 | 22 | 22 | 3 | 1 | 0 | 0 | 50  | 45 | 0.0  | 450.0 | 250.0  | 200.0  | 4172.5 |
| 42 | 22 | 23 | 3 | 0 | 0 | 0 | 50  | 45 | 0.0  | 450.0 | 250.0  | 200.0  | 4372.5 |
| 42 | 22 | 24 | 3 | 0 | 0 | 0 | 50  | 45 | 0.0  | 450.0 | 250.0  | 200.0  | 4572.5 |
| 42 | 22 | 25 | 3 | 0 | 0 | 0 | 90  | 45 | 0.0  | 810.0 | 810.0  | 0.0    | 4572.5 |
| 42 | 22 | 26 | 3 | 0 | 0 | 0 | 90  | 45 | 0.0  | 810.0 | 810.0  | 0.0    | 4572.5 |
| 42 | 22 | 27 | 3 | 0 | 0 | 0 | 90  | 45 | 0.0  | 810.0 | 810.0  | 0.0    | 4572.5 |
| 42 | 22 | 28 | 3 | 0 | 0 | 0 | 100 | 45 | 0.0  | 900.0 | 1000.0 | -100.0 | 4472.5 |

|    |    |    |   |   |   |   |    |     |      |       |       |        |        |
|----|----|----|---|---|---|---|----|-----|------|-------|-------|--------|--------|
| 42 | 22 | 29 | 3 | 0 | 0 | 0 | 50 | 45  | 0.0  | 450.0 | 250.0 | 200.0  | 4672.5 |
| 42 | 22 | 30 | 3 | 0 | 0 | 0 | 50 | 45  | 0.0  | 450.0 | 250.0 | 200.0  | 4872.5 |
| 47 | 22 | 1  | 3 | 1 | 1 | 1 | 45 | 20  | 32.5 | 325.0 | 202.5 | 122.5  | 122.5  |
| 47 | 22 | 2  | 3 | 0 | 1 | 0 | 42 | 50  | 0.0  | 378.0 | 176.4 | 201.6  | 324.1  |
| 47 | 22 | 3  | 3 | 0 | 1 | 0 | 39 | 50  | 0.0  | 351.0 | 152.1 | 198.9  | 523.0  |
| 47 | 22 | 4  | 3 | 0 | 1 | 0 | 36 | 70  | 0.0  | 324.0 | 129.6 | 194.4  | 717.4  |
| 47 | 22 | 5  | 3 | 0 | 1 | 0 | 33 | 80  | 0.0  | 297.0 | 108.9 | 188.1  | 905.5  |
| 47 | 22 | 6  | 3 | 0 | 1 | 0 | 45 | 20  | 0.0  | 405.0 | 202.5 | 202.5  | 1108.0 |
| 47 | 22 | 7  | 3 | 1 | 0 | 0 | 99 | 90  | 0.0  | 891.0 | 980.1 | -89.1  | 1018.9 |
| 47 | 22 | 8  | 3 | 1 | 1 | 1 | 99 | 20  | 59.5 | 595.0 | 980.1 | -385.1 | 633.8  |
| 47 | 22 | 9  | 3 | 0 | 1 | 0 | 45 | 20  | 0.0  | 405.0 | 202.5 | 202.5  | 836.3  |
| 47 | 22 | 10 | 3 | 0 | 1 | 0 | 99 | 100 | 0.0  | 891.0 | 980.1 | -89.1  | 747.2  |
| 47 | 22 | 11 | 3 | 0 | 1 | 0 | 45 | 20  | 0.0  | 405.0 | 202.5 | 202.5  | 949.7  |
| 47 | 22 | 12 | 3 | 1 | 1 | 1 | 90 | 20  | 55.0 | 550.0 | 810.0 | -260.0 | 689.7  |
| 47 | 22 | 13 | 3 | 0 | 1 | 0 | 45 | 20  | 0.0  | 405.0 | 202.5 | 202.5  | 892.2  |
| 47 | 22 | 14 | 3 | 0 | 0 | 0 | 45 | 45  | 0.0  | 405.0 | 202.5 | 202.5  | 1094.7 |
| 47 | 22 | 15 | 3 | 0 | 1 | 0 | 45 | 20  | 0.0  | 405.0 | 202.5 | 202.5  | 1297.2 |
| 47 | 22 | 16 | 3 | 0 | 0 | 0 | 45 | 50  | 0.0  | 405.0 | 202.5 | 202.5  | 1499.7 |
| 47 | 22 | 17 | 3 | 0 | 1 | 0 | 45 | 50  | 0.0  | 405.0 | 202.5 | 202.5  | 1702.2 |
| 47 | 22 | 18 | 3 | 0 | 1 | 0 | 45 | 50  | 0.0  | 405.0 | 202.5 | 202.5  | 1904.7 |
| 47 | 22 | 19 | 3 | 0 | 0 | 0 | 45 | 50  | 0.0  | 405.0 | 202.5 | 202.5  | 2107.2 |
| 47 | 22 | 20 | 3 | 0 | 1 | 0 | 45 | 50  | 0.0  | 405.0 | 202.5 | 202.5  | 2309.7 |
| 47 | 22 | 21 | 3 | 0 | 0 | 0 | 45 | 50  | 0.0  | 405.0 | 202.5 | 202.5  | 2512.2 |
| 47 | 22 | 22 | 3 | 0 | 1 | 0 | 45 | 50  | 0.0  | 405.0 | 202.5 | 202.5  | 2714.7 |
| 47 | 22 | 23 | 3 | 0 | 0 | 0 | 45 | 50  | 0.0  | 405.0 | 202.5 | 202.5  | 2917.2 |
| 47 | 22 | 24 | 3 | 0 | 0 | 0 | 45 | 50  | 0.0  | 405.0 | 202.5 | 202.5  | 3119.7 |
| 47 | 22 | 25 | 3 | 0 | 0 | 0 | 45 | 90  | 0.0  | 405.0 | 202.5 | 202.5  | 3322.2 |
| 47 | 22 | 26 | 3 | 0 | 0 | 0 | 45 | 90  | 0.0  | 405.0 | 202.5 | 202.5  | 3524.7 |
| 47 | 22 | 27 | 3 | 0 | 0 | 0 | 45 | 90  | 0.0  | 405.0 | 202.5 | 202.5  | 3727.2 |
| 47 | 22 | 28 | 3 | 0 | 0 | 0 | 45 | 100 | 0.0  | 405.0 | 202.5 | 202.5  | 3929.7 |
| 47 | 22 | 29 | 3 | 0 | 0 | 0 | 45 | 50  | 0.0  | 405.0 | 202.5 | 202.5  | 4132.2 |
| 47 | 22 | 30 | 3 | 0 | 0 | 0 | 45 | 50  | 0.0  | 405.0 | 202.5 | 202.5  | 4334.7 |
| 43 | 23 | 1  | 3 | 0 | 0 | 0 | 30 | 30  | 0.0  | 270.0 | 90.0  | 180.0  | 180.0  |
| 43 | 23 | 2  | 3 | 1 | 1 | 1 | 40 | 42  | 41.0 | 410.0 | 160.0 | 250.0  | 430.0  |
| 43 | 23 | 3  | 3 | 1 | 1 | 1 | 70 | 44  | 57.0 | 570.0 | 490.0 | 80.0   | 510.0  |
| 43 | 23 | 4  | 3 | 0 | 1 | 0 | 55 | 40  | 0.0  | 495.0 | 302.5 | 192.5  | 702.5  |
| 43 | 23 | 5  | 3 | 1 | 1 | 1 | 10 | 43  | 26.5 | 265.0 | 10.0  | 255.0  | 957.5  |
| 43 | 23 | 6  | 3 | 0 | 1 | 0 | 20 | 43  | 0.0  | 180.0 | 40.0  | 140.0  | 1097.5 |

|    |    |    |   |   |   |   |     |     |      |       |        |        |        |
|----|----|----|---|---|---|---|-----|-----|------|-------|--------|--------|--------|
| 43 | 23 | 7  | 3 | 1 | 1 | 1 | 1   | 45  | 23.0 | 230.0 | 0.1    | 229.9  | 1327.4 |
| 43 | 23 | 8  | 3 | 0 | 0 | 0 | 1   | 45  | 0.0  | 9.0   | 0.1    | 8.9    | 1336.3 |
| 43 | 23 | 9  | 3 | 1 | 0 | 0 | 60  | 45  | 0.0  | 540.0 | 360.0  | 180.0  | 1516.3 |
| 43 | 23 | 10 | 3 | 1 | 1 | 1 | 45  | 100 | 72.5 | 725.0 | 202.5  | 522.5  | 2038.8 |
| 43 | 23 | 11 | 3 | 1 | 1 | 1 | 55  | 65  | 60.0 | 600.0 | 302.5  | 297.5  | 2336.3 |
| 43 | 23 | 12 | 3 | 1 | 1 | 1 | 1   | 50  | 25.5 | 255.0 | 0.1    | 254.9  | 2591.2 |
| 43 | 23 | 13 | 3 | 1 | 0 | 0 | 90  | 45  | 0.0  | 810.0 | 810.0  | 0.0    | 2591.2 |
| 43 | 23 | 14 | 3 | 1 | 0 | 0 | 50  | 45  | 0.0  | 450.0 | 250.0  | 200.0  | 2791.2 |
| 43 | 23 | 15 | 3 | 0 | 1 | 0 | 45  | 45  | 0.0  | 405.0 | 202.5  | 202.5  | 2993.7 |
| 43 | 23 | 16 | 3 | 0 | 1 | 0 | 45  | 47  | 0.0  | 405.0 | 202.5  | 202.5  | 3196.2 |
| 43 | 23 | 17 | 3 | 1 | 1 | 1 | 50  | 44  | 47.0 | 470.0 | 250.0  | 220.0  | 3416.2 |
| 43 | 23 | 18 | 3 | 1 | 1 | 1 | 55  | 44  | 49.5 | 495.0 | 302.5  | 192.5  | 3608.7 |
| 43 | 23 | 19 | 3 | 1 | 1 | 1 | 30  | 44  | 37.0 | 370.0 | 90.0   | 280.0  | 3888.7 |
| 43 | 23 | 20 | 3 | 1 | 1 | 1 | 20  | 45  | 32.5 | 325.0 | 40.0   | 285.0  | 4173.7 |
| 43 | 23 | 21 | 3 | 1 | 0 | 0 | 45  | 45  | 0.0  | 405.0 | 202.5  | 202.5  | 4376.2 |
| 43 | 23 | 22 | 3 | 1 | 1 | 1 | 15  | 44  | 29.5 | 295.0 | 22.5   | 272.5  | 4648.7 |
| 43 | 23 | 23 | 3 | 1 | 1 | 1 | 40  | 45  | 42.5 | 425.0 | 160.0  | 265.0  | 4913.7 |
| 43 | 23 | 24 | 3 | 1 | 1 | 1 | 60  | 44  | 52.0 | 520.0 | 360.0  | 160.0  | 5073.7 |
| 43 | 23 | 25 | 3 | 1 | 1 | 1 | 30  | 45  | 37.5 | 375.0 | 90.0   | 285.0  | 5358.7 |
| 43 | 23 | 26 | 3 | 1 | 0 | 0 | 45  | 45  | 0.0  | 405.0 | 202.5  | 202.5  | 5561.2 |
| 43 | 23 | 27 | 3 | 1 | 0 | 0 | 45  | 45  | 0.0  | 405.0 | 202.5  | 202.5  | 5763.7 |
| 43 | 23 | 28 | 3 | 1 | 1 | 1 | 20  | 44  | 32.0 | 320.0 | 40.0   | 280.0  | 6043.7 |
| 43 | 23 | 29 | 3 | 1 | 0 | 0 | 45  | 45  | 0.0  | 405.0 | 202.5  | 202.5  | 6246.2 |
| 43 | 23 | 30 | 3 | 1 | 0 | 0 | 45  | 45  | 0.0  | 405.0 | 202.5  | 202.5  | 6448.7 |
| 46 | 23 | 1  | 3 | 0 | 0 | 0 | 30  | 30  | 0.0  | 270.0 | 90.0   | 180.0  | 180.0  |
| 46 | 23 | 2  | 3 | 1 | 1 | 1 | 42  | 40  | 41.0 | 410.0 | 176.4  | 233.6  | 413.6  |
| 46 | 23 | 3  | 3 | 1 | 1 | 1 | 44  | 70  | 57.0 | 570.0 | 193.6  | 376.4  | 790.0  |
| 46 | 23 | 4  | 3 | 1 | 0 | 0 | 40  | 55  | 0.0  | 360.0 | 160.0  | 200.0  | 990.0  |
| 46 | 23 | 5  | 3 | 1 | 1 | 1 | 43  | 10  | 26.5 | 265.0 | 184.9  | 80.1   | 1070.1 |
| 46 | 23 | 6  | 3 | 1 | 0 | 0 | 43  | 20  | 0.0  | 387.0 | 184.9  | 202.1  | 1272.2 |
| 46 | 23 | 7  | 3 | 1 | 1 | 1 | 45  | 1   | 23.0 | 230.0 | 202.5  | 27.5   | 1299.7 |
| 46 | 23 | 8  | 3 | 0 | 0 | 0 | 45  | 1   | 0.0  | 405.0 | 202.5  | 202.5  | 1502.2 |
| 46 | 23 | 9  | 3 | 0 | 1 | 0 | 45  | 60  | 0.0  | 405.0 | 202.5  | 202.5  | 1704.7 |
| 46 | 23 | 10 | 3 | 1 | 1 | 1 | 100 | 45  | 72.5 | 725.0 | 1000.0 | -275.0 | 1429.7 |
| 46 | 23 | 11 | 3 | 1 | 1 | 1 | 65  | 55  | 60.0 | 600.0 | 422.5  | 177.5  | 1607.2 |
| 46 | 23 | 12 | 3 | 1 | 1 | 1 | 50  | 1   | 25.5 | 255.0 | 250.0  | 5.0    | 1612.2 |
| 46 | 23 | 13 | 3 | 0 | 1 | 0 | 45  | 90  | 0.0  | 405.0 | 202.5  | 202.5  | 1814.7 |
| 46 | 23 | 14 | 3 | 0 | 1 | 0 | 45  | 50  | 0.0  | 405.0 | 202.5  | 202.5  | 2017.2 |



|    |    |    |   |   |   |   |    |    |      |       |       |       |        |
|----|----|----|---|---|---|---|----|----|------|-------|-------|-------|--------|
| 46 | 23 | 15 | 3 | 1 | 0 | 0 | 45 | 45 | 0.0  | 405.0 | 202.5 | 202.5 | 2219.7 |
| 46 | 23 | 16 | 3 | 1 | 0 | 0 | 47 | 45 | 0.0  | 423.0 | 220.9 | 202.1 | 2421.8 |
| 46 | 23 | 17 | 3 | 1 | 1 | 1 | 44 | 50 | 47.0 | 470.0 | 193.6 | 276.4 | 2698.2 |
| 46 | 23 | 18 | 3 | 1 | 1 | 1 | 44 | 55 | 49.5 | 495.0 | 193.6 | 301.4 | 2999.6 |
| 46 | 23 | 19 | 3 | 1 | 1 | 1 | 44 | 30 | 37.0 | 370.0 | 193.6 | 176.4 | 3176.0 |
| 46 | 23 | 20 | 3 | 1 | 1 | 1 | 45 | 20 | 32.5 | 325.0 | 202.5 | 122.5 | 3298.5 |
| 46 | 23 | 21 | 3 | 0 | 1 | 0 | 45 | 45 | 0.0  | 405.0 | 202.5 | 202.5 | 3501.0 |
| 46 | 23 | 22 | 3 | 1 | 1 | 1 | 44 | 15 | 29.5 | 295.0 | 193.6 | 101.4 | 3602.4 |
| 46 | 23 | 23 | 3 | 1 | 1 | 1 | 45 | 40 | 42.5 | 425.0 | 202.5 | 222.5 | 3824.9 |
| 46 | 23 | 24 | 3 | 1 | 1 | 1 | 44 | 60 | 52.0 | 520.0 | 193.6 | 326.4 | 4151.3 |
| 46 | 23 | 25 | 3 | 1 | 1 | 1 | 45 | 30 | 37.5 | 375.0 | 202.5 | 172.5 | 4323.8 |
| 46 | 23 | 26 | 3 | 0 | 1 | 0 | 45 | 45 | 0.0  | 405.0 | 202.5 | 202.5 | 4526.3 |
| 46 | 23 | 27 | 3 | 0 | 1 | 0 | 45 | 45 | 0.0  | 405.0 | 202.5 | 202.5 | 4728.8 |
| 46 | 23 | 28 | 3 | 1 | 1 | 1 | 44 | 20 | 32.0 | 320.0 | 193.6 | 126.4 | 4855.2 |
| 46 | 23 | 29 | 3 | 0 | 1 | 0 | 45 | 45 | 0.0  | 405.0 | 202.5 | 202.5 | 5057.7 |
| 46 | 23 | 30 | 3 | 0 | 1 | 0 | 45 | 45 | 0.0  | 405.0 | 202.5 | 202.5 | 5260.2 |
| 44 | 24 | 1  | 3 | 0 | 0 | 0 | 40 | 45 | 0.0  | 360.0 | 160.0 | 200.0 | 200.0  |
| 44 | 24 | 2  | 3 | 0 | 1 | 0 | 40 | 45 | 0.0  | 360.0 | 160.0 | 200.0 | 400.0  |
| 44 | 24 | 3  | 3 | 1 | 0 | 0 | 45 | 45 | 0.0  | 405.0 | 202.5 | 202.5 | 602.5  |
| 44 | 24 | 4  | 3 | 1 | 1 | 1 | 45 | 45 | 45.0 | 450.0 | 202.5 | 247.5 | 850.0  |
| 44 | 24 | 5  | 3 | 1 | 1 | 1 | 45 | 45 | 45.0 | 450.0 | 202.5 | 247.5 | 1097.5 |
| 44 | 24 | 6  | 3 | 1 | 1 | 1 | 45 | 50 | 47.5 | 475.0 | 202.5 | 272.5 | 1370.0 |
| 44 | 24 | 7  | 3 | 1 | 1 | 1 | 50 | 40 | 45.0 | 450.0 | 250.0 | 200.0 | 1570.0 |
| 44 | 24 | 8  | 3 | 1 | 1 | 1 | 50 | 50 | 50.0 | 500.0 | 250.0 | 250.0 | 1820.0 |
| 44 | 24 | 9  | 3 | 1 | 1 | 1 | 50 | 40 | 45.0 | 450.0 | 250.0 | 200.0 | 2020.0 |
| 44 | 24 | 10 | 3 | 1 | 1 | 1 | 40 | 30 | 35.0 | 350.0 | 160.0 | 190.0 | 2210.0 |
| 44 | 24 | 11 | 3 | 0 | 1 | 0 | 45 | 45 | 0.0  | 405.0 | 202.5 | 202.5 | 2412.5 |
| 44 | 24 | 12 | 3 | 0 | 1 | 0 | 45 | 45 | 0.0  | 405.0 | 202.5 | 202.5 | 2615.0 |
| 44 | 24 | 13 | 3 | 1 | 1 | 1 | 30 | 50 | 40.0 | 400.0 | 90.0  | 310.0 | 2925.0 |
| 44 | 24 | 14 | 3 | 1 | 1 | 1 | 40 | 0  | 20.0 | 200.0 | 160.0 | 40.0  | 2965.0 |
| 44 | 24 | 15 | 3 | 0 | 1 | 0 | 45 | 45 | 0.0  | 405.0 | 202.5 | 202.5 | 3167.5 |
| 44 | 24 | 16 | 3 | 0 | 1 | 0 | 45 | 45 | 0.0  | 405.0 | 202.5 | 202.5 | 3370.0 |
| 44 | 24 | 17 | 3 | 0 | 1 | 0 | 45 | 45 | 0.0  | 405.0 | 202.5 | 202.5 | 3572.5 |
| 44 | 24 | 18 | 3 | 0 | 1 | 0 | 45 | 45 | 0.0  | 405.0 | 202.5 | 202.5 | 3775.0 |
| 44 | 24 | 19 | 3 | 0 | 0 | 0 | 45 | 45 | 0.0  | 405.0 | 202.5 | 202.5 | 3977.5 |
| 44 | 24 | 20 | 3 | 0 | 1 | 0 | 45 | 45 | 0.0  | 405.0 | 202.5 | 202.5 | 4180.0 |
| 44 | 24 | 21 | 3 | 1 | 1 | 1 | 1  | 25 | 13.0 | 130.0 | 0.1   | 129.9 | 4309.9 |
| 44 | 24 | 22 | 3 | 0 | 1 | 0 | 45 | 45 | 0.0  | 405.0 | 202.5 | 202.5 | 4512.4 |

|    |    |    |   |   |   |   |    |    |      |       |       |       |        |
|----|----|----|---|---|---|---|----|----|------|-------|-------|-------|--------|
| 44 | 24 | 23 | 3 | 0 | 1 | 0 | 45 | 45 | 0.0  | 405.0 | 202.5 | 202.5 | 4714.9 |
| 44 | 24 | 24 | 3 | 1 | 1 | 1 | 30 | 25 | 27.5 | 275.0 | 90.0  | 185.0 | 4899.9 |
| 44 | 24 | 25 | 3 | 1 | 1 | 1 | 40 | 25 | 32.5 | 325.0 | 160.0 | 165.0 | 5064.9 |
| 44 | 24 | 26 | 3 | 1 | 1 | 1 | 40 | 25 | 32.5 | 325.0 | 160.0 | 165.0 | 5229.9 |
| 44 | 24 | 27 | 3 | 0 | 1 | 0 | 45 | 45 | 0.0  | 405.0 | 202.5 | 202.5 | 5432.4 |
| 44 | 24 | 28 | 3 | 0 | 1 | 0 | 45 | 45 | 0.0  | 405.0 | 202.5 | 202.5 | 5634.9 |
| 44 | 24 | 29 | 3 | 0 | 1 | 0 | 45 | 45 | 0.0  | 405.0 | 202.5 | 202.5 | 5837.4 |
| 44 | 24 | 30 | 3 | 1 | 1 | 1 | 1  | 25 | 13.0 | 130.0 | 0.1   | 129.9 | 5967.3 |
| 45 | 24 | 1  | 3 | 0 | 0 | 0 | 45 | 40 | 0.0  | 405.0 | 202.5 | 202.5 | 202.5  |
| 45 | 24 | 2  | 3 | 1 | 0 | 0 | 45 | 40 | 0.0  | 405.0 | 202.5 | 202.5 | 405.0  |
| 45 | 24 | 3  | 3 | 0 | 1 | 0 | 45 | 45 | 0.0  | 405.0 | 202.5 | 202.5 | 607.5  |
| 45 | 24 | 4  | 3 | 1 | 1 | 1 | 45 | 45 | 45.0 | 450.0 | 202.5 | 247.5 | 855.0  |
| 45 | 24 | 5  | 3 | 1 | 1 | 1 | 45 | 45 | 45.0 | 450.0 | 202.5 | 247.5 | 1102.5 |
| 45 | 24 | 6  | 3 | 1 | 1 | 1 | 50 | 45 | 47.5 | 475.0 | 250.0 | 225.0 | 1327.5 |
| 45 | 24 | 7  | 3 | 1 | 1 | 1 | 40 | 50 | 45.0 | 450.0 | 160.0 | 290.0 | 1617.5 |
| 45 | 24 | 8  | 3 | 1 | 1 | 1 | 50 | 50 | 50.0 | 500.0 | 250.0 | 250.0 | 1867.5 |
| 45 | 24 | 9  | 3 | 1 | 1 | 1 | 40 | 50 | 45.0 | 450.0 | 160.0 | 290.0 | 2157.5 |
| 45 | 24 | 10 | 3 | 1 | 1 | 1 | 30 | 40 | 35.0 | 350.0 | 90.0  | 260.0 | 2417.5 |
| 45 | 24 | 11 | 3 | 1 | 0 | 0 | 45 | 45 | 0.0  | 405.0 | 202.5 | 202.5 | 2620.0 |
| 45 | 24 | 12 | 3 | 1 | 0 | 0 | 45 | 45 | 0.0  | 405.0 | 202.5 | 202.5 | 2822.5 |
| 45 | 24 | 13 | 3 | 1 | 1 | 1 | 50 | 30 | 40.0 | 400.0 | 250.0 | 150.0 | 2972.5 |
| 45 | 24 | 14 | 3 | 1 | 1 | 1 | 0  | 40 | 20.0 | 200.0 | 0.0   | 200.0 | 3172.5 |
| 45 | 24 | 15 | 3 | 1 | 0 | 0 | 45 | 45 | 0.0  | 405.0 | 202.5 | 202.5 | 3375.0 |
| 45 | 24 | 16 | 3 | 1 | 0 | 0 | 45 | 45 | 0.0  | 405.0 | 202.5 | 202.5 | 3577.5 |
| 45 | 24 | 17 | 3 | 1 | 0 | 0 | 45 | 45 | 0.0  | 405.0 | 202.5 | 202.5 | 3780.0 |
| 45 | 24 | 18 | 3 | 1 | 0 | 0 | 45 | 45 | 0.0  | 405.0 | 202.5 | 202.5 | 3982.5 |
| 45 | 24 | 19 | 3 | 0 | 0 | 0 | 45 | 45 | 0.0  | 405.0 | 202.5 | 202.5 | 4185.0 |
| 45 | 24 | 20 | 3 | 1 | 0 | 0 | 45 | 45 | 0.0  | 405.0 | 202.5 | 202.5 | 4387.5 |
| 45 | 24 | 21 | 3 | 1 | 1 | 1 | 25 | 1  | 13.0 | 130.0 | 62.5  | 67.5  | 4455.0 |
| 45 | 24 | 22 | 3 | 1 | 0 | 0 | 45 | 45 | 0.0  | 405.0 | 202.5 | 202.5 | 4657.5 |
| 45 | 24 | 23 | 3 | 1 | 0 | 0 | 45 | 45 | 0.0  | 405.0 | 202.5 | 202.5 | 4860.0 |
| 45 | 24 | 24 | 3 | 1 | 1 | 1 | 25 | 30 | 27.5 | 275.0 | 62.5  | 212.5 | 5072.5 |
| 45 | 24 | 25 | 3 | 1 | 1 | 1 | 25 | 40 | 32.5 | 325.0 | 62.5  | 262.5 | 5335.0 |
| 45 | 24 | 26 | 3 | 1 | 1 | 1 | 25 | 40 | 32.5 | 325.0 | 62.5  | 262.5 | 5597.5 |
| 45 | 24 | 27 | 3 | 1 | 0 | 0 | 45 | 45 | 0.0  | 405.0 | 202.5 | 202.5 | 5800.0 |
| 45 | 24 | 28 | 3 | 1 | 0 | 0 | 45 | 45 | 0.0  | 405.0 | 202.5 | 202.5 | 6002.5 |
| 45 | 24 | 29 | 3 | 1 | 0 | 0 | 45 | 45 | 0.0  | 405.0 | 202.5 | 202.5 | 6205.0 |
| 45 | 24 | 30 | 3 | 1 | 1 | 1 | 25 | 1  | 13.0 | 130.0 | 62.5  | 67.5  | 6272.5 |
