# Supplementary material
Source: MDPI journal article supplement (https://www.mdpi.com/2073-4336/2/3/277)
Supplement: s1 [file s1]

# Teaming Instructions for ENFORCED ASYM

## Instructions

You are participating in a decision-making experiment, where you have the opportunity to earn money. How much money you earn depends on your own decisions, but may also depend on those of other participants.

You will make individual decisions at your computer. From now on, please do not talk with other participants until the end of the experiment.

In the experiment, you will be anonymously paired with another participant to form a group of two. The experiment consists of 30 repetitions, called periods. You will stay in the same group with the same other participant during all 30 periods. In each of the periods, you will be in the same decision situation.

Each participant has to choose an effort, which is an integer number between 0 and 100. The effort incurs a cost measured in Experimental Currency Units (ECU). The two members in each group have different effort costs. For one of the two group members, the effort cost is equal to the square of the chosen effort divided by 10, while for the other it is equal to the square of the chosen effort divided by 8. Tables 1 and 1A below show for the two group members, respectively, the cost of each effort level between 1 and 100. Zero effort implies zero cost.

At the beginning of the experiment, you will find an envelope with your personal effort cost table at your computer terminal. One of the two members in each group will find Table 1 (cost equals squared effort divided by 10), while the other will find Table 1A (cost equals squared effort divided by 8).

## Your Earnings

Your profit (in ECU) in a period is determined as follows.

- Your profit is determined by the average effort by you and the other group member, multiplied by 8 ECU, minus the cost of your individual effort in ECU.

Your total profit for the experiment equals the sum of your profits over the 30 periods. At the end of the experiment, your total profit will be converted to Canadian dollars with a conversion rate of 50 cents per 100 ECU.

## Available Information

At the beginning of each period (except for the first one), you are informed of your result in the previous period. This includes your individual effort, the average effort in your group, your effort cost, your profit and your cumulated profit over all previous periods.

At any time, by clicking on the magnifying glass icon on your screen, you can access a table of your results in all previous periods. The table shows the results of the first period in the top line and the results of subsequent periods underneath.

Before we begin the experiment, we ask you to answer some comprehension questions regarding these instructions. Everybody must answer all of the questions correctly before we carry on.

**Table 1.** Individual effort cost (Effort level squared and divided by 10).

| Effort level | Effort cost | Effort level | Effort cost |
|--------------|-------------|--------------|-------------|
| 1            | 0.10        | 51           | 260.10      |
| 2            | 0.40        | 52           | 270.40      |
| 3            | 0.90        | 53           | 280.90      |
| 4            | 1.60        | 54           | 291.60      |
| 5            | 2.50        | 55           | 302.50      |
| 6            | 3.60        | 56           | 313.60      |
| 7            | 4.90        | 57           | 624.90      |
| 8            | 6.40        | 58           | 336.40      |
| 9            | 8.10        | 59           | 348.10      |
| 10           | 10.00       | 60           | 360.00      |
| 11           | 12.10       | 61           | 372.10      |
| 12           | 14.40       | 62           | 384.40      |
| 13           | 16.90       | 63           | 396.90      |
| 14           | 19.60       | 64           | 409.60      |
| 15           | 22.50       | 65           | 422.50      |
| 16           | 25.60       | 66           | 435.60      |
| 17           | 28.90       | 67           | 448.90      |
| 18           | 32.40       | 68           | 462.40      |
| 19           | 36.10       | 69           | 476.10      |
| 20           | 40.00       | 70           | 490.00      |
| 21           | 44.10       | 71           | 504.10      |
| 22           | 48.40       | 72           | 518.40      |
| 23           | 52.90       | 73           | 532.90      |
| 24           | 57.60       | 74           | 547.60      |
| 25           | 62.50       | 75           | 562.50      |
| 26           | 67.60       | 76           | 577.60      |
| 27           | 72.90       | 77           | 592.90      |
| 28           | 78.40       | 78           | 608.40      |
| 29           | 84.10       | 79           | 624.10      |
| 30           | 90.00       | 80           | 640.00      |
| 31           | 96.10       | 81           | 656.10      |
| 32           | 102.40      | 82           | 672.40      |
| 33           | 108.90      | 83           | 688.90      |
| 34           | 115.60      | 84           | 705.60      |
| 35           | 122.50      | 85           | 722.50      |
| 36           | 129.60      | 86           | 739.60      |
| 37           | 136.90      | 87           | 756.90      |
| 38           | 144.40      | 88           | 774.40      |
| 39           | 152.10      | 89           | 792.10      |
| 40           | 160.00      | 90           | 810.00      |
| 41           | 168.10      | 91           | 828.10      |
| 42           | 176.40      | 92           | 846.40      |
| 43           | 184.90      | 93           | 864.90      |
| 44           | 193.60      | 94           | 883.60      |
| 45           | 202.50      | 95           | 802.50      |
| 46           | 211.60      | 96           | 921.60      |
| 47           | 220.90      | 97           | 940.90      |
| 48           | 230.40      | 98           | 960.40      |
| 49           | 240.10      | 99           | 980.10      |
| 50           | 250.00      | 100          | 1000.00     |

**Table 1A.** Individual effort cost (Effort level squared and divided by 8).

| <b>Effort level</b> | <b>Effort cost</b> | <b>Effort level</b> | <b>Effort cost</b> |
|---------------------|--------------------|---------------------|--------------------|
| <b>1</b>            | 0.13               | <b>51</b>           | 325.13             |
| <b>2</b>            | 0.50               | <b>52</b>           | 338.00             |
| <b>3</b>            | 1.13               | <b>53</b>           | 351.13             |
| <b>4</b>            | 2.00               | <b>54</b>           | 364.50             |
| <b>5</b>            | 3.13               | <b>55</b>           | 378.13             |
| <b>6</b>            | 4.50               | <b>56</b>           | 392.00             |
| <b>7</b>            | 6.13               | <b>57</b>           | 406.13             |
| <b>8</b>            | 8.00               | <b>58</b>           | 420.50             |
| <b>9</b>            | 10.13              | <b>59</b>           | 435.13             |
| <b>10</b>           | 12.50              | <b>60</b>           | 450.00             |
| <b>11</b>           | 15.13              | <b>61</b>           | 465.13             |
| <b>12</b>           | 18.00              | <b>62</b>           | 480.50             |
| <b>13</b>           | 21.13              | <b>63</b>           | 496.13             |
| <b>14</b>           | 24.50              | <b>64</b>           | 512.00             |
| <b>15</b>           | 28.13              | <b>65</b>           | 528.13             |
| <b>16</b>           | 32.00              | <b>66</b>           | 544.50             |
| <b>17</b>           | 36.13              | <b>67</b>           | 561.13             |
| <b>18</b>           | 40.50              | <b>68</b>           | 578.00             |
| <b>19</b>           | 45.13              | <b>69</b>           | 595.13             |
| <b>20</b>           | 50.00              | <b>70</b>           | 612.50             |
| <b>21</b>           | 55.13              | <b>71</b>           | 630.13             |
| <b>22</b>           | 60.50              | <b>72</b>           | 648.00             |
| <b>23</b>           | 66.13              | <b>73</b>           | 666.13             |
| <b>24</b>           | 72.00              | <b>74</b>           | 684.50             |
| <b>25</b>           | 78.13              | <b>75</b>           | 703.13             |
| <b>26</b>           | 84.50              | <b>76</b>           | 722.00             |
| <b>27</b>           | 91.13              | <b>77</b>           | 741.13             |
| <b>28</b>           | 98.00              | <b>78</b>           | 760.50             |
| <b>29</b>           | 105.13             | <b>79</b>           | 780.13             |
| <b>30</b>           | 112.50             | <b>80</b>           | 800.00             |
| <b>31</b>           | 120.13             | <b>81</b>           | 820.13             |
| <b>32</b>           | 128.00             | <b>82</b>           | 840.50             |
| <b>33</b>           | 136.13             | <b>83</b>           | 861.13             |
| <b>34</b>           | 144.50             | <b>84</b>           | 882.00             |
| <b>35</b>           | 153.13             | <b>85</b>           | 903.13             |
| <b>36</b>           | 162.00             | <b>86</b>           | 924.50             |
| <b>37</b>           | 171.13             | <b>87</b>           | 946.13             |
| <b>38</b>           | 180.50             | <b>88</b>           | 968.00             |
| <b>39</b>           | 190.13             | <b>89</b>           | 990.13             |
| <b>40</b>           | 200.00             | <b>90</b>           | 1012.50            |
| <b>41</b>           | 210.13             | <b>91</b>           | 1035.13            |
| <b>42</b>           | 220.50             | <b>92</b>           | 1058.00            |
| <b>43</b>           | 231.13             | <b>93</b>           | 1081.13            |
| <b>44</b>           | 242.00             | <b>94</b>           | 1104.50            |
| <b>45</b>           | 253.13             | <b>95</b>           | 1128.13            |
| <b>46</b>           | 264.50             | <b>96</b>           | 1152.00            |
| <b>47</b>           | 276.13             | <b>97</b>           | 1176.13            |
| <b>48</b>           | 288.00             | <b>98</b>           | 1200.50            |
| <b>49</b>           | 300.13             | <b>99</b>           | 1225.13            |
| <b>50</b>           | 312.50             | <b>100</b>          | 1250.00            |

## Data for ENFORCED ASYM

| Player | Group | Period | Session | Effort | Other effort | Mean effort | Remuneration | Cost  | Profit | Cum. profit | Low cost |
|--------|-------|--------|---------|--------|--------------|-------------|--------------|-------|--------|-------------|----------|
| 1      | 1     | 1      | 1       | 20     | 26           | 23.0        | 184.0        | 40.0  | 144.0  | 144.0       | 1        |
| 1      | 1     | 2      | 1       | 26     | 65           | 45.5        | 364.0        | 67.6  | 296.4  | 440.4       | 1        |
| 1      | 1     | 3      | 1       | 26     | 20           | 23.0        | 184.0        | 67.6  | 116.4  | 556.8       | 1        |
| 1      | 1     | 4      | 1       | 50     | 18           | 34.0        | 272.0        | 250.0 | 22.0   | 578.8       | 1        |
| 1      | 1     | 5      | 1       | 50     | 14           | 32.0        | 256.0        | 250.0 | 6.0    | 584.8       | 1        |
| 1      | 1     | 6      | 1       | 55     | 25           | 40.0        | 320.0        | 302.5 | 17.5   | 602.3       | 1        |
| 1      | 1     | 7      | 1       | 60     | 36           | 48.0        | 384.0        | 360.0 | 24.0   | 626.3       | 1        |
| 1      | 1     | 8      | 1       | 50     | 50           | 50.0        | 400.0        | 250.0 | 150.0  | 776.3       | 1        |
| 1      | 1     | 9      | 1       | 55     | 55           | 55.0        | 440.0        | 302.5 | 137.5  | 913.8       | 1        |
| 1      | 1     | 10     | 1       | 75     | 60           | 67.5        | 540.0        | 562.5 | -22.5  | 891.3       | 1        |
| 1      | 1     | 11     | 1       | 60     | 67           | 63.5        | 508.0        | 360.0 | 148.0  | 1039.3      | 1        |
| 1      | 1     | 12     | 1       | 60     | 48           | 54.0        | 432.0        | 360.0 | 72.0   | 1111.3      | 1        |
| 1      | 1     | 13     | 1       | 50     | 40           | 45.0        | 360.0        | 250.0 | 110.0  | 1221.3      | 1        |
| 1      | 1     | 14     | 1       | 50     | 40           | 45.0        | 360.0        | 250.0 | 110.0  | 1331.3      | 1        |
| 1      | 1     | 15     | 1       | 45     | 44           | 44.5        | 356.0        | 202.5 | 153.5  | 1484.8      | 1        |
| 1      | 1     | 16     | 1       | 45     | 45           | 45.0        | 360.0        | 202.5 | 157.5  | 1642.3      | 1        |
| 1      | 1     | 17     | 1       | 40     | 50           | 45.0        | 360.0        | 160.0 | 200.0  | 1842.3      | 1        |
| 1      | 1     | 18     | 1       | 30     | 55           | 42.5        | 340.0        | 90.0  | 250.0  | 2092.3      | 1        |
| 1      | 1     | 19     | 1       | 25     | 60           | 42.5        | 340.0        | 62.5  | 277.5  | 2369.8      | 1        |
| 1      | 1     | 20     | 1       | 20     | 40           | 30.0        | 240.0        | 40.0  | 200.0  | 2569.8      | 1        |
| 1      | 1     | 21     | 1       | 15     | 35           | 25.0        | 200.0        | 22.5  | 177.5  | 2747.3      | 1        |
| 1      | 1     | 22     | 1       | 20     | 45           | 32.5        | 260.0        | 40.0  | 220.0  | 2967.3      | 1        |
| 1      | 1     | 23     | 1       | 24     | 47           | 35.5        | 284.0        | 57.6  | 226.4  | 3193.7      | 1        |
| 1      | 1     | 24     | 1       | 25     | 55           | 40.0        | 320.0        | 62.5  | 257.5  | 3451.2      | 1        |
| 1      | 1     | 25     | 1       | 27     | 45           | 36.0        | 288.0        | 72.9  | 215.1  | 3666.3      | 1        |
| 1      | 1     | 26     | 1       | 25     | 47           | 36.0        | 288.0        | 62.5  | 225.5  | 3891.8      | 1        |
| 1      | 1     | 27     | 1       | 24     | 49           | 36.5        | 292.0        | 57.6  | 234.4  | 4126.2      | 1        |
| 1      | 1     | 28     | 1       | 20     | 51           | 35.5        | 284.0        | 40.0  | 244.0  | 4370.2      | 1        |
| 1      | 1     | 29     | 1       | 19     | 45           | 32.0        | 256.0        | 36.1  | 219.9  | 4590.1      | 1        |
| 1      | 1     | 30     | 1       | 1      | 45           | 23.0        | 184.0        | 0.1   | 183.9  | 4774.0      | 1        |
| 8      | 1     | 1      | 1       | 26     | 20           | 23.0        | 184.0        | 84.5  | 99.5   | 99.5        | 0        |
| 8      | 1     | 2      | 1       | 65     | 26           | 45.5        | 364.0        | 528.1 | -164.1 | -64.6       | 0        |
| 8      | 1     | 3      | 1       | 20     | 26           | 23.0        | 184.0        | 50.0  | 134.0  | 69.4        | 0        |

|   |   |    |   |    |    |      |       |       |        |        |   |
|---|---|----|---|----|----|------|-------|-------|--------|--------|---|
| 8 | 1 | 4  | 1 | 18 | 50 | 34.0 | 272.0 | 40.5  | 231.5  | 300.9  | 0 |
| 8 | 1 | 5  | 1 | 14 | 50 | 32.0 | 256.0 | 24.5  | 231.5  | 532.4  | 0 |
| 8 | 1 | 6  | 1 | 25 | 55 | 40.0 | 320.0 | 78.1  | 241.9  | 774.3  | 0 |
| 8 | 1 | 7  | 1 | 36 | 60 | 48.0 | 384.0 | 162.0 | 222.0  | 996.3  | 0 |
| 8 | 1 | 8  | 1 | 50 | 50 | 50.0 | 400.0 | 312.5 | 87.5   | 1083.8 | 0 |
| 8 | 1 | 9  | 1 | 55 | 55 | 55.0 | 440.0 | 378.1 | 61.9   | 1145.6 | 0 |
| 8 | 1 | 10 | 1 | 60 | 75 | 67.5 | 540.0 | 450.0 | 90.0   | 1235.6 | 0 |
| 8 | 1 | 11 | 1 | 67 | 60 | 63.5 | 508.0 | 561.1 | -53.1  | 1182.5 | 0 |
| 8 | 1 | 12 | 1 | 48 | 60 | 54.0 | 432.0 | 288.0 | 144.0  | 1326.5 | 0 |
| 8 | 1 | 13 | 1 | 40 | 50 | 45.0 | 360.0 | 200.0 | 160.0  | 1486.5 | 0 |
| 8 | 1 | 14 | 1 | 40 | 50 | 45.0 | 360.0 | 200.0 | 160.0  | 1646.5 | 0 |
| 8 | 1 | 15 | 1 | 44 | 45 | 44.5 | 356.0 | 242.0 | 114.0  | 1760.5 | 0 |
| 8 | 1 | 16 | 1 | 45 | 45 | 45.0 | 360.0 | 253.1 | 106.9  | 1867.4 | 0 |
| 8 | 1 | 17 | 1 | 50 | 40 | 45.0 | 360.0 | 312.5 | 47.5   | 1914.9 | 0 |
| 8 | 1 | 18 | 1 | 55 | 30 | 42.5 | 340.0 | 378.1 | -38.1  | 1876.8 | 0 |
| 8 | 1 | 19 | 1 | 60 | 25 | 42.5 | 340.0 | 450.0 | -110.0 | 1766.8 | 0 |
| 8 | 1 | 20 | 1 | 40 | 20 | 30.0 | 240.0 | 200.0 | 40.0   | 1806.8 | 0 |
| 8 | 1 | 21 | 1 | 35 | 15 | 25.0 | 200.0 | 153.1 | 46.9   | 1853.6 | 0 |
| 8 | 1 | 22 | 1 | 45 | 20 | 32.5 | 260.0 | 253.1 | 6.9    | 1860.5 | 0 |
| 8 | 1 | 23 | 1 | 47 | 24 | 35.5 | 284.0 | 276.1 | 7.9    | 1868.4 | 0 |
| 8 | 1 | 24 | 1 | 55 | 25 | 40.0 | 320.0 | 378.1 | -58.1  | 1810.3 | 0 |
| 8 | 1 | 25 | 1 | 45 | 27 | 36.0 | 288.0 | 253.1 | 34.9   | 1845.1 | 0 |
| 8 | 1 | 26 | 1 | 47 | 25 | 36.0 | 288.0 | 276.1 | 11.9   | 1857.0 | 0 |
| 8 | 1 | 27 | 1 | 49 | 24 | 36.5 | 292.0 | 300.1 | -8.1   | 1848.9 | 0 |
| 8 | 1 | 28 | 1 | 51 | 20 | 35.5 | 284.0 | 325.1 | -41.1  | 1807.8 | 0 |
| 8 | 1 | 29 | 1 | 45 | 19 | 32.0 | 256.0 | 253.1 | 2.9    | 1810.6 | 0 |
| 8 | 1 | 30 | 1 | 45 | 1  | 23.0 | 184.0 | 253.1 | -69.1  | 1741.5 | 0 |
| 2 | 2 | 1  | 1 | 40 | 7  | 23.5 | 188.0 | 200.0 | -12.0  | -12.0  | 0 |
| 2 | 2 | 2  | 1 | 30 | 10 | 20.0 | 160.0 | 112.5 | 47.5   | 35.5   | 0 |
| 2 | 2 | 3  | 1 | 32 | 50 | 41.0 | 328.0 | 128.0 | 200.0  | 235.5  | 0 |
| 2 | 2 | 4  | 1 | 40 | 10 | 25.0 | 200.0 | 200.0 | 0.0    | 235.5  | 0 |
| 2 | 2 | 5  | 1 | 35 | 10 | 22.5 | 180.0 | 153.1 | 26.9   | 262.4  | 0 |
| 2 | 2 | 6  | 1 | 38 | 10 | 24.0 | 192.0 | 180.5 | 11.5   | 273.9  | 0 |
| 2 | 2 | 7  | 1 | 23 | 10 | 16.5 | 132.0 | 66.1  | 65.9   | 339.8  | 0 |
| 2 | 2 | 8  | 1 | 22 | 10 | 16.0 | 128.0 | 60.5  | 67.5   | 407.3  | 0 |

|   |   |    |   |    |    |      |       |       |       |        |   |
|---|---|----|---|----|----|------|-------|-------|-------|--------|---|
| 2 | 2 | 9  | 1 | 32 | 7  | 19.5 | 156.0 | 128.0 | 28.0  | 435.3  | 0 |
| 2 | 2 | 10 | 1 | 14 | 8  | 11.0 | 88.0  | 24.5  | 63.5  | 498.8  | 0 |
| 2 | 2 | 11 | 1 | 10 | 50 | 30.0 | 240.0 | 12.5  | 227.5 | 726.3  | 0 |
| 2 | 2 | 12 | 1 | 20 | 10 | 15.0 | 120.0 | 50.0  | 70.0  | 796.3  | 0 |
| 2 | 2 | 13 | 1 | 22 | 10 | 16.0 | 128.0 | 60.5  | 67.5  | 863.8  | 0 |
| 2 | 2 | 14 | 1 | 10 | 9  | 9.5  | 76.0  | 12.5  | 63.5  | 927.3  | 0 |
| 2 | 2 | 15 | 1 | 22 | 11 | 16.5 | 132.0 | 60.5  | 71.5  | 998.8  | 0 |
| 2 | 2 | 16 | 1 | 23 | 10 | 16.5 | 132.0 | 66.1  | 65.9  | 1064.6 | 0 |
| 2 | 2 | 17 | 1 | 1  | 10 | 5.5  | 44.0  | 0.1   | 43.9  | 1108.5 | 0 |
| 2 | 2 | 18 | 1 | 5  | 10 | 7.5  | 60.0  | 3.1   | 56.9  | 1165.4 | 0 |
| 2 | 2 | 19 | 1 | 15 | 1  | 8.0  | 64.0  | 28.1  | 35.9  | 1201.3 | 0 |
| 2 | 2 | 20 | 1 | 20 | 10 | 15.0 | 120.0 | 50.0  | 70.0  | 1271.3 | 0 |
| 2 | 2 | 21 | 1 | 20 | 10 | 15.0 | 120.0 | 50.0  | 70.0  | 1341.3 | 0 |
| 2 | 2 | 22 | 1 | 10 | 10 | 10.0 | 80.0  | 12.5  | 67.5  | 1408.8 | 0 |
| 2 | 2 | 23 | 1 | 20 | 5  | 12.5 | 100.0 | 50.0  | 50.0  | 1458.8 | 0 |
| 2 | 2 | 24 | 1 | 5  | 10 | 7.5  | 60.0  | 3.1   | 56.9  | 1515.6 | 0 |
| 2 | 2 | 25 | 1 | 18 | 10 | 14.0 | 112.0 | 40.5  | 71.5  | 1587.1 | 0 |
| 2 | 2 | 26 | 1 | 1  | 9  | 5.0  | 40.0  | 0.1   | 39.9  | 1627.0 | 0 |
| 2 | 2 | 27 | 1 | 1  | 10 | 5.5  | 44.0  | 0.1   | 43.9  | 1670.9 | 0 |
| 2 | 2 | 28 | 1 | 5  | 10 | 7.5  | 60.0  | 3.1   | 56.9  | 1727.8 | 0 |
| 2 | 2 | 29 | 1 | 10 | 10 | 10.0 | 80.0  | 12.5  | 67.5  | 1795.3 | 0 |
| 2 | 2 | 30 | 1 | 20 | 11 | 15.5 | 124.0 | 50.0  | 74.0  | 1869.3 | 0 |
| 7 | 2 | 1  | 1 | 7  | 40 | 23.5 | 188.0 | 4.9   | 183.1 | 183.1  | 1 |
| 7 | 2 | 2  | 1 | 10 | 30 | 20.0 | 160.0 | 10.0  | 150.0 | 333.1  | 1 |
| 7 | 2 | 3  | 1 | 50 | 32 | 41.0 | 328.0 | 250.0 | 78.0  | 411.1  | 1 |
| 7 | 2 | 4  | 1 | 10 | 40 | 25.0 | 200.0 | 10.0  | 190.0 | 601.1  | 1 |
| 7 | 2 | 5  | 1 | 10 | 35 | 22.5 | 180.0 | 10.0  | 170.0 | 771.1  | 1 |
| 7 | 2 | 6  | 1 | 10 | 38 | 24.0 | 192.0 | 10.0  | 182.0 | 953.1  | 1 |
| 7 | 2 | 7  | 1 | 10 | 23 | 16.5 | 132.0 | 10.0  | 122.0 | 1075.1 | 1 |
| 7 | 2 | 8  | 1 | 10 | 22 | 16.0 | 128.0 | 10.0  | 118.0 | 1193.1 | 1 |
| 7 | 2 | 9  | 1 | 7  | 32 | 19.5 | 156.0 | 4.9   | 151.1 | 1344.2 | 1 |
| 7 | 2 | 10 | 1 | 8  | 14 | 11.0 | 88.0  | 6.4   | 81.6  | 1425.8 | 1 |
| 7 | 2 | 11 | 1 | 50 | 10 | 30.0 | 240.0 | 250.0 | -10.0 | 1415.8 | 1 |
| 7 | 2 | 12 | 1 | 10 | 20 | 15.0 | 120.0 | 10.0  | 110.0 | 1525.8 | 1 |
| 7 | 2 | 13 | 1 | 10 | 22 | 16.0 | 128.0 | 10.0  | 118.0 | 1643.8 | 1 |

|   |   |    |   |    |    |      |       |       |        |        |   |
|---|---|----|---|----|----|------|-------|-------|--------|--------|---|
| 7 | 2 | 14 | 1 | 9  | 10 | 9.5  | 76.0  | 8.1   | 67.9   | 1711.7 | 1 |
| 7 | 2 | 15 | 1 | 11 | 22 | 16.5 | 132.0 | 12.1  | 119.9  | 1831.6 | 1 |
| 7 | 2 | 16 | 1 | 10 | 23 | 16.5 | 132.0 | 10.0  | 122.0  | 1953.6 | 1 |
| 7 | 2 | 17 | 1 | 10 | 1  | 5.5  | 44.0  | 10.0  | 34.0   | 1987.6 | 1 |
| 7 | 2 | 18 | 1 | 10 | 5  | 7.5  | 60.0  | 10.0  | 50.0   | 2037.6 | 1 |
| 7 | 2 | 19 | 1 | 1  | 15 | 8.0  | 64.0  | 0.1   | 63.9   | 2101.5 | 1 |
| 7 | 2 | 20 | 1 | 10 | 20 | 15.0 | 120.0 | 10.0  | 110.0  | 2211.5 | 1 |
| 7 | 2 | 21 | 1 | 10 | 20 | 15.0 | 120.0 | 10.0  | 110.0  | 2321.5 | 1 |
| 7 | 2 | 22 | 1 | 10 | 10 | 10.0 | 80.0  | 10.0  | 70.0   | 2391.5 | 1 |
| 7 | 2 | 23 | 1 | 5  | 20 | 12.5 | 100.0 | 2.5   | 97.5   | 2489.0 | 1 |
| 7 | 2 | 24 | 1 | 10 | 5  | 7.5  | 60.0  | 10.0  | 50.0   | 2539.0 | 1 |
| 7 | 2 | 25 | 1 | 10 | 18 | 14.0 | 112.0 | 10.0  | 102.0  | 2641.0 | 1 |
| 7 | 2 | 26 | 1 | 9  | 1  | 5.0  | 40.0  | 8.1   | 31.9   | 2672.9 | 1 |
| 7 | 2 | 27 | 1 | 10 | 1  | 5.5  | 44.0  | 10.0  | 34.0   | 2706.9 | 1 |
| 7 | 2 | 28 | 1 | 10 | 5  | 7.5  | 60.0  | 10.0  | 50.0   | 2756.9 | 1 |
| 7 | 2 | 29 | 1 | 10 | 10 | 10.0 | 80.0  | 10.0  | 70.0   | 2826.9 | 1 |
| 7 | 2 | 30 | 1 | 11 | 20 | 15.5 | 124.0 | 12.1  | 111.9  | 2938.8 | 1 |
| 3 | 3 | 1  | 1 | 71 | 32 | 51.5 | 412.0 | 504.1 | −92.1  | −92.1  | 1 |
| 3 | 3 | 2  | 1 | 50 | 32 | 41.0 | 328.0 | 250.0 | 78.0   | −14.1  | 1 |
| 3 | 3 | 3  | 1 | 50 | 40 | 45.0 | 360.0 | 250.0 | 110.0  | 95.9   | 1 |
| 3 | 3 | 4  | 1 | 60 | 45 | 52.5 | 420.0 | 360.0 | 60.0   | 155.9  | 1 |
| 3 | 3 | 5  | 1 | 70 | 32 | 51.0 | 408.0 | 490.0 | −82.0  | 73.9   | 1 |
| 3 | 3 | 6  | 1 | 60 | 1  | 30.5 | 244.0 | 360.0 | −116.0 | −42.1  | 1 |
| 3 | 3 | 7  | 1 | 50 | 10 | 30.0 | 240.0 | 250.0 | −10.0  | −52.1  | 1 |
| 3 | 3 | 8  | 1 | 30 | 50 | 40.0 | 320.0 | 90.0  | 230.0  | 177.9  | 1 |
| 3 | 3 | 9  | 1 | 25 | 10 | 17.5 | 140.0 | 62.5  | 77.5   | 255.4  | 1 |
| 3 | 3 | 10 | 1 | 15 | 20 | 17.5 | 140.0 | 22.5  | 117.5  | 372.9  | 1 |
| 3 | 3 | 11 | 1 | 10 | 20 | 15.0 | 120.0 | 10.0  | 110.0  | 482.9  | 1 |
| 3 | 3 | 12 | 1 | 10 | 30 | 20.0 | 160.0 | 10.0  | 150.0  | 632.9  | 1 |
| 3 | 3 | 13 | 1 | 5  | 1  | 3.0  | 24.0  | 2.5   | 21.5   | 654.4  | 1 |
| 3 | 3 | 14 | 1 | 30 | 30 | 30.0 | 240.0 | 90.0  | 150.0  | 804.4  | 1 |
| 3 | 3 | 15 | 1 | 35 | 35 | 35.0 | 280.0 | 122.5 | 157.5  | 961.9  | 1 |
| 3 | 3 | 16 | 1 | 35 | 30 | 32.5 | 260.0 | 122.5 | 137.5  | 1099.4 | 1 |
| 3 | 3 | 17 | 1 | 40 | 30 | 35.0 | 280.0 | 160.0 | 120.0  | 1219.4 | 1 |
| 3 | 3 | 18 | 1 | 25 | 30 | 27.5 | 220.0 | 62.5  | 157.5  | 1376.9 | 1 |

|   |   |    |   |    |    |      |       |       |       |        |   |
|---|---|----|---|----|----|------|-------|-------|-------|--------|---|
| 3 | 3 | 19 | 1 | 20 | 30 | 25.0 | 200.0 | 40.0  | 160.0 | 1536.9 | 1 |
| 3 | 3 | 20 | 1 | 20 | 30 | 25.0 | 200.0 | 40.0  | 160.0 | 1696.9 | 1 |
| 3 | 3 | 21 | 1 | 20 | 20 | 20.0 | 160.0 | 40.0  | 120.0 | 1816.9 | 1 |
| 3 | 3 | 22 | 1 | 20 | 20 | 20.0 | 160.0 | 40.0  | 120.0 | 1936.9 | 1 |
| 3 | 3 | 23 | 1 | 30 | 20 | 25.0 | 200.0 | 90.0  | 110.0 | 2046.9 | 1 |
| 3 | 3 | 24 | 1 | 25 | 30 | 27.5 | 220.0 | 62.5  | 157.5 | 2204.4 | 1 |
| 3 | 3 | 25 | 1 | 25 | 20 | 22.5 | 180.0 | 62.5  | 117.5 | 2321.9 | 1 |
| 3 | 3 | 26 | 1 | 25 | 22 | 23.5 | 188.0 | 62.5  | 125.5 | 2447.4 | 1 |
| 3 | 3 | 27 | 1 | 30 | 20 | 25.0 | 200.0 | 90.0  | 110.0 | 2557.4 | 1 |
| 3 | 3 | 28 | 1 | 20 | 25 | 22.5 | 180.0 | 40.0  | 140.0 | 2697.4 | 1 |
| 3 | 3 | 29 | 1 | 18 | 20 | 19.0 | 152.0 | 32.4  | 119.6 | 2817.0 | 1 |
| 3 | 3 | 30 | 1 | 25 | 8  | 16.5 | 132.0 | 62.5  | 69.5  | 2886.5 | 1 |
| 6 | 3 | 1  | 1 | 32 | 71 | 51.5 | 412.0 | 128.0 | 284.0 | 284.0  | 0 |
| 6 | 3 | 2  | 1 | 32 | 50 | 41.0 | 328.0 | 128.0 | 200.0 | 484.0  | 0 |
| 6 | 3 | 3  | 1 | 40 | 50 | 45.0 | 360.0 | 200.0 | 160.0 | 644.0  | 0 |
| 6 | 3 | 4  | 1 | 45 | 60 | 52.5 | 420.0 | 253.1 | 166.9 | 810.9  | 0 |
| 6 | 3 | 5  | 1 | 32 | 70 | 51.0 | 408.0 | 128.0 | 280.0 | 1090.9 | 0 |
| 6 | 3 | 6  | 1 | 1  | 60 | 30.5 | 244.0 | 0.1   | 243.9 | 1334.8 | 0 |
| 6 | 3 | 7  | 1 | 10 | 50 | 30.0 | 240.0 | 12.5  | 227.5 | 1562.3 | 0 |
| 6 | 3 | 8  | 1 | 50 | 30 | 40.0 | 320.0 | 312.5 | 7.5   | 1569.8 | 0 |
| 6 | 3 | 9  | 1 | 10 | 25 | 17.5 | 140.0 | 12.5  | 127.5 | 1697.3 | 0 |
| 6 | 3 | 10 | 1 | 20 | 15 | 17.5 | 140.0 | 50.0  | 90.0  | 1787.3 | 0 |
| 6 | 3 | 11 | 1 | 20 | 10 | 15.0 | 120.0 | 50.0  | 70.0  | 1857.3 | 0 |
| 6 | 3 | 12 | 1 | 30 | 10 | 20.0 | 160.0 | 112.5 | 47.5  | 1904.8 | 0 |
| 6 | 3 | 13 | 1 | 1  | 5  | 3.0  | 24.0  | 0.1   | 23.9  | 1928.6 | 0 |
| 6 | 3 | 14 | 1 | 30 | 30 | 30.0 | 240.0 | 112.5 | 127.5 | 2056.1 | 0 |
| 6 | 3 | 15 | 1 | 35 | 35 | 35.0 | 280.0 | 153.1 | 126.9 | 2183.0 | 0 |
| 6 | 3 | 16 | 1 | 30 | 35 | 32.5 | 260.0 | 112.5 | 147.5 | 2330.5 | 0 |
| 6 | 3 | 17 | 1 | 30 | 40 | 35.0 | 280.0 | 112.5 | 167.5 | 2498.0 | 0 |
| 6 | 3 | 18 | 1 | 30 | 25 | 27.5 | 220.0 | 112.5 | 107.5 | 2605.5 | 0 |
| 6 | 3 | 19 | 1 | 30 | 20 | 25.0 | 200.0 | 112.5 | 87.5  | 2693.0 | 0 |
| 6 | 3 | 20 | 1 | 30 | 20 | 25.0 | 200.0 | 112.5 | 87.5  | 2780.5 | 0 |
| 6 | 3 | 21 | 1 | 20 | 20 | 20.0 | 160.0 | 50.0  | 110.0 | 2890.5 | 0 |
| 6 | 3 | 22 | 1 | 20 | 20 | 20.0 | 160.0 | 50.0  | 110.0 | 3000.5 | 0 |
| 6 | 3 | 23 | 1 | 20 | 30 | 25.0 | 200.0 | 50.0  | 150.0 | 3150.5 | 0 |



|   |   |    |   |     |     |      |       |        |        |         |   |
|---|---|----|---|-----|-----|------|-------|--------|--------|---------|---|
| 6 | 3 | 24 | 1 | 30  | 25  | 27.5 | 220.0 | 112.5  | 107.5  | 3258.0  | 0 |
| 6 | 3 | 25 | 1 | 20  | 25  | 22.5 | 180.0 | 50.0   | 130.0  | 3388.0  | 0 |
| 6 | 3 | 26 | 1 | 22  | 25  | 23.5 | 188.0 | 60.5   | 127.5  | 3515.5  | 0 |
| 6 | 3 | 27 | 1 | 20  | 30  | 25.0 | 200.0 | 50.0   | 150.0  | 3665.5  | 0 |
| 6 | 3 | 28 | 1 | 25  | 20  | 22.5 | 180.0 | 78.1   | 101.9  | 3767.4  | 0 |
| 6 | 3 | 29 | 1 | 20  | 18  | 19.0 | 152.0 | 50.0   | 102.0  | 3869.4  | 0 |
| 6 | 3 | 30 | 1 | 8   | 25  | 16.5 | 132.0 | 8.0    | 124.0  | 3993.4  | 0 |
| 4 | 4 | 1  | 1 | 80  | 26  | 53.0 | 424.0 | 800.0  | -376.0 | -376.0  | 0 |
| 4 | 4 | 2  | 1 | 80  | 100 | 90.0 | 720.0 | 800.0  | -80.0  | -456.0  | 0 |
| 4 | 4 | 3  | 1 | 100 | 50  | 75.0 | 600.0 | 1250.0 | -650.0 | -1106.0 | 0 |
| 4 | 4 | 4  | 1 | 100 | 10  | 55.0 | 440.0 | 1250.0 | -810.0 | -1916.0 | 0 |
| 4 | 4 | 5  | 1 | 1   | 5   | 3.0  | 24.0  | 0.1    | 23.9   | -1892.1 | 0 |
| 4 | 4 | 6  | 1 | 10  | 1   | 5.5  | 44.0  | 12.5   | 31.5   | -1860.6 | 0 |
| 4 | 4 | 7  | 1 | 1   | 1   | 1.0  | 8.0   | 0.1    | 7.9    | -1852.8 | 0 |
| 4 | 4 | 8  | 1 | 1   | 50  | 25.5 | 204.0 | 0.1    | 203.9  | -1648.9 | 0 |
| 4 | 4 | 9  | 1 | 1   | 1   | 1.0  | 8.0   | 0.1    | 7.9    | -1641.0 | 0 |
| 4 | 4 | 10 | 1 | 3   | 1   | 2.0  | 16.0  | 1.1    | 14.9   | -1626.1 | 0 |
| 4 | 4 | 11 | 1 | 1   | 1   | 1.0  | 8.0   | 0.1    | 7.9    | -1618.3 | 0 |
| 4 | 4 | 12 | 1 | 1   | 2   | 1.5  | 12.0  | 0.1    | 11.9   | -1606.4 | 0 |
| 4 | 4 | 13 | 1 | 2   | 1   | 1.5  | 12.0  | 0.5    | 11.5   | -1594.9 | 0 |
| 4 | 4 | 14 | 1 | 2   | 3   | 2.5  | 20.0  | 0.5    | 19.5   | -1575.4 | 0 |
| 4 | 4 | 15 | 1 | 4   | 4   | 4.0  | 32.0  | 2.0    | 30.0   | -1545.4 | 0 |
| 4 | 4 | 16 | 1 | 5   | 10  | 7.5  | 60.0  | 3.1    | 56.9   | -1488.5 | 0 |
| 4 | 4 | 17 | 1 | 10  | 20  | 15.0 | 120.0 | 12.5   | 107.5  | -1381.0 | 0 |
| 4 | 4 | 18 | 1 | 25  | 30  | 27.5 | 220.0 | 78.1   | 141.9  | -1239.1 | 0 |
| 4 | 4 | 19 | 1 | 35  | 45  | 40.0 | 320.0 | 153.1  | 166.9  | -1072.3 | 0 |
| 4 | 4 | 20 | 1 | 45  | 50  | 47.5 | 380.0 | 253.1  | 126.9  | -945.4  | 0 |
| 4 | 4 | 21 | 1 | 50  | 70  | 60.0 | 480.0 | 312.5  | 167.5  | -777.9  | 0 |
| 4 | 4 | 22 | 1 | 55  | 60  | 57.5 | 460.0 | 378.1  | 81.9   | -696.0  | 0 |
| 4 | 4 | 23 | 1 | 60  | 65  | 62.5 | 500.0 | 450.0  | 50.0   | -646.0  | 0 |
| 4 | 4 | 24 | 1 | 70  | 1   | 35.5 | 284.0 | 612.5  | -328.5 | -974.5  | 0 |
| 4 | 4 | 25 | 1 | 70  | 10  | 40.0 | 320.0 | 612.5  | -292.5 | -1267.0 | 0 |
| 4 | 4 | 26 | 1 | 70  | 25  | 47.5 | 380.0 | 612.5  | -232.5 | -1499.5 | 0 |
| 4 | 4 | 27 | 1 | 70  | 35  | 52.5 | 420.0 | 612.5  | -192.5 | -1692.0 | 0 |
| 4 | 4 | 28 | 1 | 90  | 25  | 57.5 | 460.0 | 1012.5 | -552.5 | -2244.5 | 0 |

|   |   |    |   |     |     |      |       |        |        |         |   |
|---|---|----|---|-----|-----|------|-------|--------|--------|---------|---|
| 4 | 4 | 29 | 1 | 90  | 1   | 45.5 | 364.0 | 1012.5 | -648.5 | -2893.0 | 0 |
| 4 | 4 | 30 | 1 | 1   | 1   | 1.0  | 8.0   | 0.1    | 7.9    | -2885.1 | 0 |
| 5 | 4 | 1  | 1 | 26  | 80  | 53.0 | 424.0 | 67.6   | 356.4  | 356.4   | 1 |
| 5 | 4 | 2  | 1 | 100 | 80  | 90.0 | 720.0 | 1000.0 | -280.0 | 76.4    | 1 |
| 5 | 4 | 3  | 1 | 50  | 100 | 75.0 | 600.0 | 250.0  | 350.0  | 426.4   | 1 |
| 5 | 4 | 4  | 1 | 10  | 100 | 55.0 | 440.0 | 10.0   | 430.0  | 856.4   | 1 |
| 5 | 4 | 5  | 1 | 5   | 1   | 3.0  | 24.0  | 2.5    | 21.5   | 877.9   | 1 |
| 5 | 4 | 6  | 1 | 1   | 10  | 5.5  | 44.0  | 0.1    | 43.9   | 921.8   | 1 |
| 5 | 4 | 7  | 1 | 1   | 1   | 1.0  | 8.0   | 0.1    | 7.9    | 929.7   | 1 |
| 5 | 4 | 8  | 1 | 50  | 1   | 25.5 | 204.0 | 250.0  | -46.0  | 883.7   | 1 |
| 5 | 4 | 9  | 1 | 1   | 1   | 1.0  | 8.0   | 0.1    | 7.9    | 891.6   | 1 |
| 5 | 4 | 10 | 1 | 1   | 3   | 2.0  | 16.0  | 0.1    | 15.9   | 907.5   | 1 |
| 5 | 4 | 11 | 1 | 1   | 1   | 1.0  | 8.0   | 0.1    | 7.9    | 915.4   | 1 |
| 5 | 4 | 12 | 1 | 2   | 1   | 1.5  | 12.0  | 0.4    | 11.6   | 927.0   | 1 |
| 5 | 4 | 13 | 1 | 1   | 2   | 1.5  | 12.0  | 0.1    | 11.9   | 938.9   | 1 |
| 5 | 4 | 14 | 1 | 3   | 2   | 2.5  | 20.0  | 0.9    | 19.1   | 958.0   | 1 |
| 5 | 4 | 15 | 1 | 4   | 4   | 4.0  | 32.0  | 1.6    | 30.4   | 988.4   | 1 |
| 5 | 4 | 16 | 1 | 10  | 5   | 7.5  | 60.0  | 10.0   | 50.0   | 1038.4  | 1 |
| 5 | 4 | 17 | 1 | 20  | 10  | 15.0 | 120.0 | 40.0   | 80.0   | 1118.4  | 1 |
| 5 | 4 | 18 | 1 | 30  | 25  | 27.5 | 220.0 | 90.0   | 130.0  | 1248.4  | 1 |
| 5 | 4 | 19 | 1 | 45  | 35  | 40.0 | 320.0 | 202.5  | 117.5  | 1365.9  | 1 |
| 5 | 4 | 20 | 1 | 50  | 45  | 47.5 | 380.0 | 250.0  | 130.0  | 1495.9  | 1 |
| 5 | 4 | 21 | 1 | 70  | 50  | 60.0 | 480.0 | 490.0  | -10.0  | 1485.9  | 1 |
| 5 | 4 | 22 | 1 | 60  | 55  | 57.5 | 460.0 | 360.0  | 100.0  | 1585.9  | 1 |
| 5 | 4 | 23 | 1 | 65  | 60  | 62.5 | 500.0 | 422.5  | 77.5   | 1663.4  | 1 |
| 5 | 4 | 24 | 1 | 1   | 70  | 35.5 | 284.0 | 0.1    | 283.9  | 1947.3  | 1 |
| 5 | 4 | 25 | 1 | 10  | 70  | 40.0 | 320.0 | 10.0   | 310.0  | 2257.3  | 1 |
| 5 | 4 | 26 | 1 | 25  | 70  | 47.5 | 380.0 | 62.5   | 317.5  | 2574.8  | 1 |
| 5 | 4 | 27 | 1 | 35  | 70  | 52.5 | 420.0 | 122.5  | 297.5  | 2872.3  | 1 |
| 5 | 4 | 28 | 1 | 25  | 90  | 57.5 | 460.0 | 62.5   | 397.5  | 3269.8  | 1 |
| 5 | 4 | 29 | 1 | 1   | 90  | 45.5 | 364.0 | 0.1    | 363.9  | 3633.7  | 1 |
| 5 | 4 | 30 | 1 | 1   | 1   | 1.0  | 8.0   | 0.1    | 7.9    | 3641.6  | 1 |
| 9 | 5 | 1  | 2 | 40  | 79  | 59.5 | 476.0 | 160.0  | 316.0  | 316.0   | 1 |
| 9 | 5 | 2  | 2 | 20  | 50  | 35.0 | 280.0 | 40.0   | 240.0  | 556.0   | 1 |
| 9 | 5 | 3  | 2 | 40  | 20  | 30.0 | 240.0 | 160.0  | 80.0   | 636.0   | 1 |

|    |   |    |   |    |    |      |       |       |        |        |   |
|----|---|----|---|----|----|------|-------|-------|--------|--------|---|
| 9  | 5 | 4  | 2 | 30 | 30 | 30.0 | 240.0 | 90.0  | 150.0  | 786.0  | 1 |
| 9  | 5 | 5  | 2 | 35 | 30 | 32.5 | 260.0 | 122.5 | 137.5  | 923.5  | 1 |
| 9  | 5 | 6  | 2 | 35 | 32 | 33.5 | 268.0 | 122.5 | 145.5  | 1069.0 | 1 |
| 9  | 5 | 7  | 2 | 20 | 33 | 26.5 | 212.0 | 40.0  | 172.0  | 1241.0 | 1 |
| 9  | 5 | 8  | 2 | 30 | 20 | 25.0 | 200.0 | 90.0  | 110.0  | 1351.0 | 1 |
| 9  | 5 | 9  | 2 | 30 | 25 | 27.5 | 220.0 | 90.0  | 130.0  | 1481.0 | 1 |
| 9  | 5 | 10 | 2 | 30 | 28 | 29.0 | 232.0 | 90.0  | 142.0  | 1623.0 | 1 |
| 9  | 5 | 11 | 2 | 27 | 29 | 28.0 | 224.0 | 72.9  | 151.1  | 1774.1 | 1 |
| 9  | 5 | 12 | 2 | 30 | 28 | 29.0 | 232.0 | 90.0  | 142.0  | 1916.1 | 1 |
| 9  | 5 | 13 | 2 | 27 | 29 | 28.0 | 224.0 | 72.9  | 151.1  | 2067.2 | 1 |
| 9  | 5 | 14 | 2 | 27 | 28 | 27.5 | 220.0 | 72.9  | 147.1  | 2214.3 | 1 |
| 9  | 5 | 15 | 2 | 35 | 28 | 31.5 | 252.0 | 122.5 | 129.5  | 2343.8 | 1 |
| 9  | 5 | 16 | 2 | 36 | 32 | 34.0 | 272.0 | 129.6 | 142.4  | 2486.2 | 1 |
| 9  | 5 | 17 | 2 | 35 | 34 | 34.5 | 276.0 | 122.5 | 153.5  | 2639.7 | 1 |
| 9  | 5 | 18 | 2 | 35 | 35 | 35.0 | 280.0 | 122.5 | 157.5  | 2797.2 | 1 |
| 9  | 5 | 19 | 2 | 37 | 35 | 36.0 | 288.0 | 136.9 | 151.1  | 2948.3 | 1 |
| 9  | 5 | 20 | 2 | 37 | 36 | 36.5 | 292.0 | 136.9 | 155.1  | 3103.4 | 1 |
| 9  | 5 | 21 | 2 | 36 | 37 | 36.5 | 292.0 | 129.6 | 162.4  | 3265.8 | 1 |
| 9  | 5 | 22 | 2 | 37 | 37 | 37.0 | 296.0 | 136.9 | 159.1  | 3424.9 | 1 |
| 9  | 5 | 23 | 2 | 38 | 37 | 37.5 | 300.0 | 144.4 | 155.6  | 3580.5 | 1 |
| 9  | 5 | 24 | 2 | 38 | 40 | 39.0 | 312.0 | 144.4 | 167.6  | 3748.1 | 1 |
| 9  | 5 | 25 | 2 | 40 | 39 | 39.5 | 316.0 | 160.0 | 156.0  | 3904.1 | 1 |
| 9  | 5 | 26 | 2 | 40 | 43 | 41.5 | 332.0 | 160.0 | 172.0  | 4076.1 | 1 |
| 9  | 5 | 27 | 2 | 40 | 44 | 42.0 | 336.0 | 160.0 | 176.0  | 4252.1 | 1 |
| 9  | 5 | 28 | 2 | 40 | 46 | 43.0 | 344.0 | 160.0 | 184.0  | 4436.1 | 1 |
| 9  | 5 | 29 | 2 | 40 | 45 | 42.5 | 340.0 | 160.0 | 180.0  | 4616.1 | 1 |
| 9  | 5 | 30 | 2 | 32 | 20 | 26.0 | 208.0 | 102.4 | 105.6  | 4721.7 | 1 |
| 16 | 5 | 1  | 2 | 79 | 40 | 59.5 | 476.0 | 780.1 | -304.1 | -304.1 | 0 |
| 16 | 5 | 2  | 2 | 50 | 20 | 35.0 | 280.0 | 312.5 | -32.5  | -336.6 | 0 |
| 16 | 5 | 3  | 2 | 20 | 40 | 30.0 | 240.0 | 50.0  | 190.0  | -146.6 | 0 |
| 16 | 5 | 4  | 2 | 30 | 30 | 30.0 | 240.0 | 112.5 | 127.5  | -19.1  | 0 |
| 16 | 5 | 5  | 2 | 30 | 35 | 32.5 | 260.0 | 112.5 | 147.5  | 128.4  | 0 |
| 16 | 5 | 6  | 2 | 32 | 35 | 33.5 | 268.0 | 128.0 | 140.0  | 268.4  | 0 |
| 16 | 5 | 7  | 2 | 33 | 20 | 26.5 | 212.0 | 136.1 | 75.9   | 344.3  | 0 |
| 16 | 5 | 8  | 2 | 20 | 30 | 25.0 | 200.0 | 50.0  | 150.0  | 494.3  | 0 |

|    |   |    |   |    |    |      |       |       |       |        |   |
|----|---|----|---|----|----|------|-------|-------|-------|--------|---|
| 16 | 5 | 9  | 2 | 25 | 30 | 27.5 | 220.0 | 78.1  | 141.9 | 636.1  | 0 |
| 16 | 5 | 10 | 2 | 28 | 30 | 29.0 | 232.0 | 98.0  | 134.0 | 770.1  | 0 |
| 16 | 5 | 11 | 2 | 29 | 27 | 28.0 | 224.0 | 105.1 | 118.9 | 889.0  | 0 |
| 16 | 5 | 12 | 2 | 28 | 30 | 29.0 | 232.0 | 98.0  | 134.0 | 1023.0 | 0 |
| 16 | 5 | 13 | 2 | 29 | 27 | 28.0 | 224.0 | 105.1 | 118.9 | 1141.9 | 0 |
| 16 | 5 | 14 | 2 | 28 | 27 | 27.5 | 220.0 | 98.0  | 122.0 | 1263.9 | 0 |
| 16 | 5 | 15 | 2 | 28 | 35 | 31.5 | 252.0 | 98.0  | 154.0 | 1417.9 | 0 |
| 16 | 5 | 16 | 2 | 32 | 36 | 34.0 | 272.0 | 128.0 | 144.0 | 1561.9 | 0 |
| 16 | 5 | 17 | 2 | 34 | 35 | 34.5 | 276.0 | 144.5 | 131.5 | 1693.4 | 0 |
| 16 | 5 | 18 | 2 | 35 | 35 | 35.0 | 280.0 | 153.1 | 126.9 | 1820.3 | 0 |
| 16 | 5 | 19 | 2 | 35 | 37 | 36.0 | 288.0 | 153.1 | 134.9 | 1955.1 | 0 |
| 16 | 5 | 20 | 2 | 36 | 37 | 36.5 | 292.0 | 162.0 | 130.0 | 2085.1 | 0 |
| 16 | 5 | 21 | 2 | 37 | 36 | 36.5 | 292.0 | 171.1 | 120.9 | 2206.0 | 0 |
| 16 | 5 | 22 | 2 | 37 | 37 | 37.0 | 296.0 | 171.1 | 124.9 | 2330.9 | 0 |
| 16 | 5 | 23 | 2 | 37 | 38 | 37.5 | 300.0 | 171.1 | 128.9 | 2459.8 | 0 |
| 16 | 5 | 24 | 2 | 40 | 38 | 39.0 | 312.0 | 200.0 | 112.0 | 2571.8 | 0 |
| 16 | 5 | 25 | 2 | 39 | 40 | 39.5 | 316.0 | 190.1 | 125.9 | 2697.6 | 0 |
| 16 | 5 | 26 | 2 | 43 | 40 | 41.5 | 332.0 | 231.1 | 100.9 | 2798.5 | 0 |
| 16 | 5 | 27 | 2 | 44 | 40 | 42.0 | 336.0 | 242.0 | 94.0  | 2892.5 | 0 |
| 16 | 5 | 28 | 2 | 46 | 40 | 43.0 | 344.0 | 264.5 | 79.5  | 2972.0 | 0 |
| 16 | 5 | 29 | 2 | 45 | 40 | 42.5 | 340.0 | 253.1 | 86.9  | 3058.9 | 0 |
| 16 | 5 | 30 | 2 | 20 | 32 | 26.0 | 208.0 | 50.0  | 158.0 | 3216.9 | 0 |
| 10 | 6 | 1  | 2 | 40 | 60 | 50.0 | 400.0 | 200.0 | 200.0 | 200.0  | 0 |
| 10 | 6 | 2  | 2 | 30 | 65 | 47.5 | 380.0 | 112.5 | 267.5 | 467.5  | 0 |
| 10 | 6 | 3  | 2 | 39 | 48 | 43.5 | 348.0 | 190.1 | 157.9 | 625.4  | 0 |
| 10 | 6 | 4  | 2 | 40 | 54 | 47.0 | 376.0 | 200.0 | 176.0 | 801.4  | 0 |
| 10 | 6 | 5  | 2 | 39 | 56 | 47.5 | 380.0 | 190.1 | 189.9 | 991.3  | 0 |
| 10 | 6 | 6  | 2 | 39 | 57 | 48.0 | 384.0 | 190.1 | 193.9 | 1185.1 | 0 |
| 10 | 6 | 7  | 2 | 30 | 60 | 45.0 | 360.0 | 112.5 | 247.5 | 1432.6 | 0 |
| 10 | 6 | 8  | 2 | 30 | 52 | 41.0 | 328.0 | 112.5 | 215.5 | 1648.1 | 0 |
| 10 | 6 | 9  | 2 | 30 | 48 | 39.0 | 312.0 | 112.5 | 199.5 | 1847.6 | 0 |
| 10 | 6 | 10 | 2 | 30 | 45 | 37.5 | 300.0 | 112.5 | 187.5 | 2035.1 | 0 |
| 10 | 6 | 11 | 2 | 30 | 43 | 36.5 | 292.0 | 112.5 | 179.5 | 2214.6 | 0 |
| 10 | 6 | 12 | 2 | 39 | 40 | 39.5 | 316.0 | 190.1 | 125.9 | 2340.5 | 0 |
| 10 | 6 | 13 | 2 | 40 | 38 | 39.0 | 312.0 | 200.0 | 112.0 | 2452.5 | 0 |

|    |   |    |   |    |    |      |       |       |       |        |   |
|----|---|----|---|----|----|------|-------|-------|-------|--------|---|
| 10 | 6 | 14 | 2 | 40 | 36 | 38.0 | 304.0 | 200.0 | 104.0 | 2556.5 | 0 |
| 10 | 6 | 15 | 2 | 29 | 34 | 31.5 | 252.0 | 105.1 | 146.9 | 2703.4 | 0 |
| 10 | 6 | 16 | 2 | 29 | 30 | 29.5 | 236.0 | 105.1 | 130.9 | 2834.3 | 0 |
| 10 | 6 | 17 | 2 | 29 | 28 | 28.5 | 228.0 | 105.1 | 122.9 | 2957.1 | 0 |
| 10 | 6 | 18 | 2 | 30 | 26 | 28.0 | 224.0 | 112.5 | 111.5 | 3068.6 | 0 |
| 10 | 6 | 19 | 2 | 29 | 25 | 27.0 | 216.0 | 105.1 | 110.9 | 3179.5 | 0 |
| 10 | 6 | 20 | 2 | 37 | 24 | 30.5 | 244.0 | 171.1 | 72.9  | 3252.4 | 0 |
| 10 | 6 | 21 | 2 | 39 | 36 | 37.5 | 300.0 | 190.1 | 109.9 | 3362.3 | 0 |
| 10 | 6 | 22 | 2 | 30 | 38 | 34.0 | 272.0 | 112.5 | 159.5 | 3521.8 | 0 |
| 10 | 6 | 23 | 2 | 30 | 28 | 29.0 | 232.0 | 112.5 | 119.5 | 3641.3 | 0 |
| 10 | 6 | 24 | 2 | 30 | 26 | 28.0 | 224.0 | 112.5 | 111.5 | 3752.8 | 0 |
| 10 | 6 | 25 | 2 | 30 | 24 | 27.0 | 216.0 | 112.5 | 103.5 | 3856.3 | 0 |
| 10 | 6 | 26 | 2 | 39 | 26 | 32.5 | 260.0 | 190.1 | 69.9  | 3926.1 | 0 |
| 10 | 6 | 27 | 2 | 30 | 32 | 31.0 | 248.0 | 112.5 | 135.5 | 4061.6 | 0 |
| 10 | 6 | 28 | 2 | 30 | 28 | 29.0 | 232.0 | 112.5 | 119.5 | 4181.1 | 0 |
| 10 | 6 | 29 | 2 | 30 | 26 | 28.0 | 224.0 | 112.5 | 111.5 | 4292.6 | 0 |
| 10 | 6 | 30 | 2 | 35 | 24 | 29.5 | 236.0 | 153.1 | 82.9  | 4375.5 | 0 |
| 15 | 6 | 1  | 2 | 60 | 40 | 50.0 | 400.0 | 360.0 | 40.0  | 40.0   | 1 |
| 15 | 6 | 2  | 2 | 65 | 30 | 47.5 | 380.0 | 422.5 | -42.5 | -2.5   | 1 |
| 15 | 6 | 3  | 2 | 48 | 39 | 43.5 | 348.0 | 230.4 | 117.6 | 115.1  | 1 |
| 15 | 6 | 4  | 2 | 54 | 40 | 47.0 | 376.0 | 291.6 | 84.4  | 199.5  | 1 |
| 15 | 6 | 5  | 2 | 56 | 39 | 47.5 | 380.0 | 313.6 | 66.4  | 265.9  | 1 |
| 15 | 6 | 6  | 2 | 57 | 39 | 48.0 | 384.0 | 324.9 | 59.1  | 325.0  | 1 |
| 15 | 6 | 7  | 2 | 60 | 30 | 45.0 | 360.0 | 360.0 | 0.0   | 325.0  | 1 |
| 15 | 6 | 8  | 2 | 52 | 30 | 41.0 | 328.0 | 270.4 | 57.6  | 382.6  | 1 |
| 15 | 6 | 9  | 2 | 48 | 30 | 39.0 | 312.0 | 230.4 | 81.6  | 464.2  | 1 |
| 15 | 6 | 10 | 2 | 45 | 30 | 37.5 | 300.0 | 202.5 | 97.5  | 561.7  | 1 |
| 15 | 6 | 11 | 2 | 43 | 30 | 36.5 | 292.0 | 184.9 | 107.1 | 668.8  | 1 |
| 15 | 6 | 12 | 2 | 40 | 39 | 39.5 | 316.0 | 160.0 | 156.0 | 824.8  | 1 |
| 15 | 6 | 13 | 2 | 38 | 40 | 39.0 | 312.0 | 144.4 | 167.6 | 992.4  | 1 |
| 15 | 6 | 14 | 2 | 36 | 40 | 38.0 | 304.0 | 129.6 | 174.4 | 1166.8 | 1 |
| 15 | 6 | 15 | 2 | 34 | 29 | 31.5 | 252.0 | 115.6 | 136.4 | 1303.2 | 1 |
| 15 | 6 | 16 | 2 | 30 | 29 | 29.5 | 236.0 | 90.0  | 146.0 | 1449.2 | 1 |
| 15 | 6 | 17 | 2 | 28 | 29 | 28.5 | 228.0 | 78.4  | 149.6 | 1598.8 | 1 |
| 15 | 6 | 18 | 2 | 26 | 30 | 28.0 | 224.0 | 67.6  | 156.4 | 1755.2 | 1 |

|    |   |    |   |     |    |      |       |        |        |        |   |
|----|---|----|---|-----|----|------|-------|--------|--------|--------|---|
| 15 | 6 | 19 | 2 | 25  | 29 | 27.0 | 216.0 | 62.5   | 153.5  | 1908.7 | 1 |
| 15 | 6 | 20 | 2 | 24  | 37 | 30.5 | 244.0 | 57.6   | 186.4  | 2095.1 | 1 |
| 15 | 6 | 21 | 2 | 36  | 39 | 37.5 | 300.0 | 129.6  | 170.4  | 2265.5 | 1 |
| 15 | 6 | 22 | 2 | 38  | 30 | 34.0 | 272.0 | 144.4  | 127.6  | 2393.1 | 1 |
| 15 | 6 | 23 | 2 | 28  | 30 | 29.0 | 232.0 | 78.4   | 153.6  | 2546.7 | 1 |
| 15 | 6 | 24 | 2 | 26  | 30 | 28.0 | 224.0 | 67.6   | 156.4  | 2703.1 | 1 |
| 15 | 6 | 25 | 2 | 24  | 30 | 27.0 | 216.0 | 57.6   | 158.4  | 2861.5 | 1 |
| 15 | 6 | 26 | 2 | 26  | 39 | 32.5 | 260.0 | 67.6   | 192.4  | 3053.9 | 1 |
| 15 | 6 | 27 | 2 | 32  | 30 | 31.0 | 248.0 | 102.4  | 145.6  | 3199.5 | 1 |
| 15 | 6 | 28 | 2 | 28  | 30 | 29.0 | 232.0 | 78.4   | 153.6  | 3353.1 | 1 |
| 15 | 6 | 29 | 2 | 26  | 30 | 28.0 | 224.0 | 67.6   | 156.4  | 3509.5 | 1 |
| 15 | 6 | 30 | 2 | 24  | 35 | 29.5 | 236.0 | 57.6   | 178.4  | 3687.9 | 1 |
| 11 | 7 | 1  | 2 | 50  | 90 | 70.0 | 560.0 | 250.0  | 310.0  | 310.0  | 1 |
| 11 | 7 | 2  | 2 | 50  | 90 | 70.0 | 560.0 | 250.0  | 310.0  | 620.0  | 1 |
| 11 | 7 | 3  | 2 | 50  | 90 | 70.0 | 560.0 | 250.0  | 310.0  | 930.0  | 1 |
| 11 | 7 | 4  | 2 | 50  | 70 | 60.0 | 480.0 | 250.0  | 230.0  | 1160.0 | 1 |
| 11 | 7 | 5  | 2 | 50  | 70 | 60.0 | 480.0 | 250.0  | 230.0  | 1390.0 | 1 |
| 11 | 7 | 6  | 2 | 50  | 70 | 60.0 | 480.0 | 250.0  | 230.0  | 1620.0 | 1 |
| 11 | 7 | 7  | 2 | 50  | 60 | 55.0 | 440.0 | 250.0  | 190.0  | 1810.0 | 1 |
| 11 | 7 | 8  | 2 | 50  | 40 | 45.0 | 360.0 | 250.0  | 110.0  | 1920.0 | 1 |
| 11 | 7 | 9  | 2 | 100 | 30 | 65.0 | 520.0 | 1000.0 | -480.0 | 1440.0 | 1 |
| 11 | 7 | 10 | 2 | 50  | 20 | 35.0 | 280.0 | 250.0  | 30.0   | 1470.0 | 1 |
| 11 | 7 | 11 | 2 | 60  | 30 | 45.0 | 360.0 | 360.0  | 0.0    | 1470.0 | 1 |
| 11 | 7 | 12 | 2 | 50  | 50 | 50.0 | 400.0 | 250.0  | 150.0  | 1620.0 | 1 |
| 11 | 7 | 13 | 2 | 50  | 20 | 35.0 | 280.0 | 250.0  | 30.0   | 1650.0 | 1 |
| 11 | 7 | 14 | 2 | 50  | 30 | 40.0 | 320.0 | 250.0  | 70.0   | 1720.0 | 1 |
| 11 | 7 | 15 | 2 | 50  | 20 | 35.0 | 280.0 | 250.0  | 30.0   | 1750.0 | 1 |
| 11 | 7 | 16 | 2 | 50  | 25 | 37.5 | 300.0 | 250.0  | 50.0   | 1800.0 | 1 |
| 11 | 7 | 17 | 2 | 50  | 20 | 35.0 | 280.0 | 250.0  | 30.0   | 1830.0 | 1 |
| 11 | 7 | 18 | 2 | 50  | 17 | 33.5 | 268.0 | 250.0  | 18.0   | 1848.0 | 1 |
| 11 | 7 | 19 | 2 | 25  | 15 | 20.0 | 160.0 | 62.5   | 97.5   | 1945.5 | 1 |
| 11 | 7 | 20 | 2 | 15  | 30 | 22.5 | 180.0 | 22.5   | 157.5  | 2103.0 | 1 |
| 11 | 7 | 21 | 2 | 15  | 15 | 15.0 | 120.0 | 22.5   | 97.5   | 2200.5 | 1 |
| 11 | 7 | 22 | 2 | 20  | 20 | 20.0 | 160.0 | 40.0   | 120.0  | 2320.5 | 1 |
| 11 | 7 | 23 | 2 | 25  | 25 | 25.0 | 200.0 | 62.5   | 137.5  | 2458.0 | 1 |

|    |   |    |   |    |     |      |       |        |        |         |   |
|----|---|----|---|----|-----|------|-------|--------|--------|---------|---|
| 11 | 7 | 24 | 2 | 30 | 30  | 30.0 | 240.0 | 90.0   | 150.0  | 2608.0  | 1 |
| 11 | 7 | 25 | 2 | 35 | 35  | 35.0 | 280.0 | 122.5  | 157.5  | 2765.5  | 1 |
| 11 | 7 | 26 | 2 | 40 | 40  | 40.0 | 320.0 | 160.0  | 160.0  | 2925.5  | 1 |
| 11 | 7 | 27 | 2 | 45 | 45  | 45.0 | 360.0 | 202.5  | 157.5  | 3083.0  | 1 |
| 11 | 7 | 28 | 2 | 40 | 30  | 35.0 | 280.0 | 160.0  | 120.0  | 3203.0  | 1 |
| 11 | 7 | 29 | 2 | 25 | 25  | 25.0 | 200.0 | 62.5   | 137.5  | 3340.5  | 1 |
| 11 | 7 | 30 | 2 | 35 | 10  | 22.5 | 180.0 | 122.5  | 57.5   | 3398.0  | 1 |
| 14 | 7 | 1  | 2 | 90 | 50  | 70.0 | 560.0 | 1012.5 | -452.5 | -452.5  | 0 |
| 14 | 7 | 2  | 2 | 90 | 50  | 70.0 | 560.0 | 1012.5 | -452.5 | -905.0  | 0 |
| 14 | 7 | 3  | 2 | 90 | 50  | 70.0 | 560.0 | 1012.5 | -452.5 | -1357.5 | 0 |
| 14 | 7 | 4  | 2 | 70 | 50  | 60.0 | 480.0 | 612.5  | -132.5 | -1490.0 | 0 |
| 14 | 7 | 5  | 2 | 70 | 50  | 60.0 | 480.0 | 612.5  | -132.5 | -1622.5 | 0 |
| 14 | 7 | 6  | 2 | 70 | 50  | 60.0 | 480.0 | 612.5  | -132.5 | -1755.0 | 0 |
| 14 | 7 | 7  | 2 | 60 | 50  | 55.0 | 440.0 | 450.0  | -10.0  | -1765.0 | 0 |
| 14 | 7 | 8  | 2 | 40 | 50  | 45.0 | 360.0 | 200.0  | 160.0  | -1605.0 | 0 |
| 14 | 7 | 9  | 2 | 30 | 100 | 65.0 | 520.0 | 112.5  | 407.5  | -1197.5 | 0 |
| 14 | 7 | 10 | 2 | 20 | 50  | 35.0 | 280.0 | 50.0   | 230.0  | -967.5  | 0 |
| 14 | 7 | 11 | 2 | 30 | 60  | 45.0 | 360.0 | 112.5  | 247.5  | -720.0  | 0 |
| 14 | 7 | 12 | 2 | 50 | 50  | 50.0 | 400.0 | 312.5  | 87.5   | -632.5  | 0 |
| 14 | 7 | 13 | 2 | 20 | 50  | 35.0 | 280.0 | 50.0   | 230.0  | -402.5  | 0 |
| 14 | 7 | 14 | 2 | 30 | 50  | 40.0 | 320.0 | 112.5  | 207.5  | -195.0  | 0 |
| 14 | 7 | 15 | 2 | 20 | 50  | 35.0 | 280.0 | 50.0   | 230.0  | 35.0    | 0 |
| 14 | 7 | 16 | 2 | 25 | 50  | 37.5 | 300.0 | 78.1   | 221.9  | 256.9   | 0 |
| 14 | 7 | 17 | 2 | 20 | 50  | 35.0 | 280.0 | 50.0   | 230.0  | 486.9   | 0 |
| 14 | 7 | 18 | 2 | 17 | 50  | 33.5 | 268.0 | 36.1   | 231.9  | 718.8   | 0 |
| 14 | 7 | 19 | 2 | 15 | 25  | 20.0 | 160.0 | 28.1   | 131.9  | 850.6   | 0 |
| 14 | 7 | 20 | 2 | 30 | 15  | 22.5 | 180.0 | 112.5  | 67.5   | 918.1   | 0 |
| 14 | 7 | 21 | 2 | 15 | 15  | 15.0 | 120.0 | 28.1   | 91.9   | 1010.0  | 0 |
| 14 | 7 | 22 | 2 | 20 | 20  | 20.0 | 160.0 | 50.0   | 110.0  | 1120.0  | 0 |
| 14 | 7 | 23 | 2 | 25 | 25  | 25.0 | 200.0 | 78.1   | 121.9  | 1241.9  | 0 |
| 14 | 7 | 24 | 2 | 30 | 30  | 30.0 | 240.0 | 112.5  | 127.5  | 1369.4  | 0 |
| 14 | 7 | 25 | 2 | 35 | 35  | 35.0 | 280.0 | 153.1  | 126.9  | 1496.3  | 0 |
| 14 | 7 | 26 | 2 | 40 | 40  | 40.0 | 320.0 | 200.0  | 120.0  | 1616.3  | 0 |
| 14 | 7 | 27 | 2 | 45 | 45  | 45.0 | 360.0 | 253.1  | 106.9  | 1723.1  | 0 |
| 14 | 7 | 28 | 2 | 30 | 40  | 35.0 | 280.0 | 112.5  | 167.5  | 1890.6  | 0 |

|    |   |    |   |    |    |      |       |      |       |        |   |
|----|---|----|---|----|----|------|-------|------|-------|--------|---|
| 14 | 7 | 29 | 2 | 25 | 25 | 25.0 | 200.0 | 78.1 | 121.9 | 2012.5 | 0 |
| 14 | 7 | 30 | 2 | 10 | 35 | 22.5 | 180.0 | 12.5 | 167.5 | 2180.0 | 0 |
| 12 | 8 | 1  | 2 | 15 | 26 | 20.5 | 164.0 | 28.1 | 135.9 | 135.9  | 0 |
| 12 | 8 | 2  | 2 | 10 | 30 | 20.0 | 160.0 | 12.5 | 147.5 | 283.4  | 0 |
| 12 | 8 | 3  | 2 | 5  | 28 | 16.5 | 132.0 | 3.1  | 128.9 | 412.3  | 0 |
| 12 | 8 | 4  | 2 | 5  | 29 | 17.0 | 136.0 | 3.1  | 132.9 | 545.1  | 0 |
| 12 | 8 | 5  | 2 | 1  | 27 | 14.0 | 112.0 | 0.1  | 111.9 | 657.0  | 0 |
| 12 | 8 | 6  | 2 | 1  | 31 | 16.0 | 128.0 | 0.1  | 127.9 | 784.9  | 0 |
| 12 | 8 | 7  | 2 | 1  | 32 | 16.5 | 132.0 | 0.1  | 131.9 | 916.8  | 0 |
| 12 | 8 | 8  | 2 | 1  | 32 | 16.5 | 132.0 | 0.1  | 131.9 | 1048.6 | 0 |
| 12 | 8 | 9  | 2 | 1  | 30 | 15.5 | 124.0 | 0.1  | 123.9 | 1172.5 | 0 |
| 12 | 8 | 10 | 2 | 1  | 29 | 15.0 | 120.0 | 0.1  | 119.9 | 1292.4 | 0 |
| 12 | 8 | 11 | 2 | 1  | 29 | 15.0 | 120.0 | 0.1  | 119.9 | 1412.3 | 0 |
| 12 | 8 | 12 | 2 | 1  | 30 | 15.5 | 124.0 | 0.1  | 123.9 | 1536.1 | 0 |
| 12 | 8 | 13 | 2 | 1  | 31 | 16.0 | 128.0 | 0.1  | 127.9 | 1664.0 | 0 |
| 12 | 8 | 14 | 2 | 1  | 30 | 15.5 | 124.0 | 0.1  | 123.9 | 1787.9 | 0 |
| 12 | 8 | 15 | 2 | 1  | 30 | 15.5 | 124.0 | 0.1  | 123.9 | 1911.8 | 0 |
| 12 | 8 | 16 | 2 | 1  | 33 | 17.0 | 136.0 | 0.1  | 135.9 | 2047.6 | 0 |
| 12 | 8 | 17 | 2 | 1  | 29 | 15.0 | 120.0 | 0.1  | 119.9 | 2167.5 | 0 |
| 12 | 8 | 18 | 2 | 1  | 27 | 14.0 | 112.0 | 0.1  | 111.9 | 2279.4 | 0 |
| 12 | 8 | 19 | 2 | 1  | 29 | 15.0 | 120.0 | 0.1  | 119.9 | 2399.3 | 0 |
| 12 | 8 | 20 | 2 | 1  | 29 | 15.0 | 120.0 | 0.1  | 119.9 | 2519.1 | 0 |
| 12 | 8 | 21 | 2 | 1  | 31 | 16.0 | 128.0 | 0.1  | 127.9 | 2647.0 | 0 |
| 12 | 8 | 22 | 2 | 1  | 29 | 15.0 | 120.0 | 0.1  | 119.9 | 2766.9 | 0 |
| 12 | 8 | 23 | 2 | 1  | 28 | 14.5 | 116.0 | 0.1  | 115.9 | 2882.8 | 0 |
| 12 | 8 | 24 | 2 | 1  | 30 | 15.5 | 124.0 | 0.1  | 123.9 | 3006.6 | 0 |
| 12 | 8 | 25 | 2 | 1  | 29 | 15.0 | 120.0 | 0.1  | 119.9 | 3126.5 | 0 |
| 12 | 8 | 26 | 2 | 1  | 29 | 15.0 | 120.0 | 0.1  | 119.9 | 3246.4 | 0 |
| 12 | 8 | 27 | 2 | 1  | 30 | 15.5 | 124.0 | 0.1  | 123.9 | 3370.3 | 0 |
| 12 | 8 | 28 | 2 | 1  | 30 | 15.5 | 124.0 | 0.1  | 123.9 | 3494.1 | 0 |
| 12 | 8 | 29 | 2 | 1  | 31 | 16.0 | 128.0 | 0.1  | 127.9 | 3622.0 | 0 |
| 12 | 8 | 30 | 2 | 1  | 29 | 15.0 | 120.0 | 0.1  | 119.9 | 3741.9 | 0 |
| 13 | 8 | 1  | 2 | 26 | 15 | 20.5 | 164.0 | 67.6 | 96.4  | 96.4   | 1 |
| 13 | 8 | 2  | 2 | 30 | 10 | 20.0 | 160.0 | 90.0 | 70.0  | 166.4  | 1 |
| 13 | 8 | 3  | 2 | 28 | 5  | 16.5 | 132.0 | 78.4 | 53.6  | 220.0  | 1 |



|    |   |    |   |    |   |      |       |       |      |        |   |
|----|---|----|---|----|---|------|-------|-------|------|--------|---|
| 13 | 8 | 4  | 2 | 29 | 5 | 17.0 | 136.0 | 84.1  | 51.9 | 271.9  | 1 |
| 13 | 8 | 5  | 2 | 27 | 1 | 14.0 | 112.0 | 72.9  | 39.1 | 311.0  | 1 |
| 13 | 8 | 6  | 2 | 31 | 1 | 16.0 | 128.0 | 96.1  | 31.9 | 342.9  | 1 |
| 13 | 8 | 7  | 2 | 32 | 1 | 16.5 | 132.0 | 102.4 | 29.6 | 372.5  | 1 |
| 13 | 8 | 8  | 2 | 32 | 1 | 16.5 | 132.0 | 102.4 | 29.6 | 402.1  | 1 |
| 13 | 8 | 9  | 2 | 30 | 1 | 15.5 | 124.0 | 90.0  | 34.0 | 436.1  | 1 |
| 13 | 8 | 10 | 2 | 29 | 1 | 15.0 | 120.0 | 84.1  | 35.9 | 472.0  | 1 |
| 13 | 8 | 11 | 2 | 29 | 1 | 15.0 | 120.0 | 84.1  | 35.9 | 507.9  | 1 |
| 13 | 8 | 12 | 2 | 30 | 1 | 15.5 | 124.0 | 90.0  | 34.0 | 541.9  | 1 |
| 13 | 8 | 13 | 2 | 31 | 1 | 16.0 | 128.0 | 96.1  | 31.9 | 573.8  | 1 |
| 13 | 8 | 14 | 2 | 30 | 1 | 15.5 | 124.0 | 90.0  | 34.0 | 607.8  | 1 |
| 13 | 8 | 15 | 2 | 30 | 1 | 15.5 | 124.0 | 90.0  | 34.0 | 641.8  | 1 |
| 13 | 8 | 16 | 2 | 33 | 1 | 17.0 | 136.0 | 108.9 | 27.1 | 668.9  | 1 |
| 13 | 8 | 17 | 2 | 29 | 1 | 15.0 | 120.0 | 84.1  | 35.9 | 704.8  | 1 |
| 13 | 8 | 18 | 2 | 27 | 1 | 14.0 | 112.0 | 72.9  | 39.1 | 743.9  | 1 |
| 13 | 8 | 19 | 2 | 29 | 1 | 15.0 | 120.0 | 84.1  | 35.9 | 779.8  | 1 |
| 13 | 8 | 20 | 2 | 29 | 1 | 15.0 | 120.0 | 84.1  | 35.9 | 815.7  | 1 |
| 13 | 8 | 21 | 2 | 31 | 1 | 16.0 | 128.0 | 96.1  | 31.9 | 847.6  | 1 |
| 13 | 8 | 22 | 2 | 29 | 1 | 15.0 | 120.0 | 84.1  | 35.9 | 883.5  | 1 |
| 13 | 8 | 23 | 2 | 28 | 1 | 14.5 | 116.0 | 78.4  | 37.6 | 921.1  | 1 |
| 13 | 8 | 24 | 2 | 30 | 1 | 15.5 | 124.0 | 90.0  | 34.0 | 955.1  | 1 |
| 13 | 8 | 25 | 2 | 29 | 1 | 15.0 | 120.0 | 84.1  | 35.9 | 991.0  | 1 |
| 13 | 8 | 26 | 2 | 29 | 1 | 15.0 | 120.0 | 84.1  | 35.9 | 1026.9 | 1 |
| 13 | 8 | 27 | 2 | 30 | 1 | 15.5 | 124.0 | 90.0  | 34.0 | 1060.9 | 1 |
| 13 | 8 | 28 | 2 | 30 | 1 | 15.5 | 124.0 | 90.0  | 34.0 | 1094.9 | 1 |
| 13 | 8 | 29 | 2 | 31 | 1 | 16.0 | 128.0 | 96.1  | 31.9 | 1126.8 | 1 |
| 13 | 8 | 30 | 2 | 29 | 1 | 15.0 | 120.0 | 84.1  | 35.9 | 1162.7 | 1 |
